# Supplementary material
Source: PubMed Central journal article supplement (PMC4135602)
Supplement: MCB.01693-13_zmb999100531so2.pdf [file MCB.01693-13_zmb999100531so2.pdf]

**Table S1. Gene listing of MCF-IM inducible gene expression microarray profile.**

| Probeset | Symbol   | ENSEMBL         | Description                                                                      | Induced by PMA | Induced by TGF | More in CSC than NCSC | Induced by PMA (CSC) |
|----------|----------|-----------------|----------------------------------------------------------------------------------|----------------|----------------|-----------------------|----------------------|
| 7898663  | PINK1    | ENSG00000158828 | PTEN induced putative kinase 1                                                   | yes            | yes            | ---                   | ---                  |
| 7899018  | TMEM57   | ENSG00000204178 | transmembrane protein 57                                                         | yes            | yes            | ---                   | ---                  |
| 7899310  | TMEM222  | ENSG00000186501 | transmembrane protein 222                                                        | yes            | yes            | ---                   | ---                  |
| 7903507  | FAM102B  | ENSG00000162636 | family with sequence similarity 102, member B                                    | yes            | yes            | ---                   | ---                  |
| 7906061  | SYT11    | ENSG00000132718 | synaptotagmin XI                                                                 | yes            | yes            | ---                   | ---                  |
| 7923378  | CSRP1    | ENSG00000159176 | cysteine and glycine-rich protein 1                                              | yes            | yes            | ---                   | ---                  |
| 7909890  | HLX      | ENSG00000136630 | H2.0-like homeobox                                                               | yes            | yes            | ---                   | ---                  |
| 7912257  | CLSTN1   | ENSG00000171603 | calyntenin 1                                                                     | yes            | yes            | ---                   | ---                  |
| 7913655  | ID3      | ENSG00000117318 | inhibitor of DNA binding 3, dominant negative helix-loop-helix protein           | yes            | yes            | ---                   | ---                  |
| 7916304  | GLIS1    | ENSG00000174332 | GLIS family zinc finger 1                                                        | yes            | yes            | ---                   | ---                  |
| 7917885  | CNN3     | ENSG00000117519 | calponin 3, acidic                                                               | yes            | yes            | ---                   | ---                  |
| 7920258  | S100A6   | ENSG00000197956 | S100 calcium binding protein A6                                                  | yes            | yes            | ---                   | ---                  |
| 7928944  | PAPSS2   | ENSG00000198682 | 3'-phosphoadenosine 5'-phosphosulfate synthase 2                                 | yes            | yes            | ---                   | ---                  |
| 7931455  | LRRC27   | ENSG00000148814 | leucine rich repeat containing 27                                                | yes            | yes            | ---                   | ---                  |
| 7938485  | MICAL2   | ENSG00000133816 | microtubule associated monooxygenase, calponin and LIM domain containing 2       | yes            | yes            | ---                   | ---                  |
| 7939052  | FIBIN    | ENSG00000176971 | fin bud initiation factor homolog (zebrafish)                                    | yes            | yes            | ---                   | ---                  |
| 7942342  | INPPL1   | ENSG00000165458 | inositol polyphosphate phosphatase-like 1                                        | yes            | yes            | ---                   | ---                  |
| 7942957  | PRSS23   | ENSG00000150687 | protease, serine, 23                                                             | yes            | yes            | ---                   | ---                  |
| 7948987  | PLA2G16  | ENSG00000176485 | phospholipase A2, group XVI                                                      | yes            | yes            | ---                   | ---                  |
| 7950391  | PGM2L1   | ENSG00000165434 | phosphoglucomutase 2-like 1                                                      | yes            | yes            | ---                   | ---                  |
| 7958989  | PLBD2    | ENSG00000151176 | phospholipase B domain containing 2                                              | yes            | yes            | ---                   | ---                  |
| 7961514  | MGP      | ENSG00000111341 | matrix Gla protein                                                               | yes            | yes            | ---                   | ---                  |
| 7972936  | TMEM255B | ENSG00000184497 | transmembrane protein 255B                                                       | yes            | yes            | ---                   | ---                  |
| 7975324  | GALNT16  | ENSG00000100626 | UDP-N-acetyl-alpha-D-galactosamine:polypeptide N-acetylgalactosaminyltransferase | yes            | yes            | ---                   | ---                  |
| 7980152  | LTBP2    | ENSG00000119681 | latent transforming growth factor beta binding protein 2                         | yes            | yes            | ---                   | ---                  |
| 7975787  | JDP2     | ENSG00000140044 | Jun dimerization protein 2                                                       | yes            | yes            | ---                   | ---                  |
| 7977397  | CRIP2    | ENSG00000182809 | cysteine-rich protein 2                                                          | yes            | yes            | ---                   | ---                  |
| 7984079  | TPM1     | ENSG00000140416 | tropomyosin 1 (alpha)                                                            | yes            | yes            | ---                   | ---                  |
| 7990736  | ADAMTS7  | ENSG00000136378 | ADAM metallopeptidase with thrombospondin type 1 motif, 7                        | yes            | yes            | ---                   | ---                  |
| 7992474  | TSC2     | ENSG00000103197 | tuberous sclerosis 2                                                             | yes            | yes            | ---                   | ---                  |
| 7995976  | CPNE2    | ENSG00000140848 | copine II                                                                        | yes            | yes            | ---                   | ---                  |
| 7996490  | TMEM208  | ENSG00000168701 | transmembrane protein 208                                                        | yes            | yes            | ---                   | ---                  |
| 7997662  | KIAA0513 | ENSG00000135709 | KIAA0513                                                                         | yes            | yes            | ---                   | ---                  |
| 8002975  | CDYL2    | ENSG00000166446 | chromodomain protein, Y-like 2                                                   | yes            | yes            | ---                   | ---                  |
| 8004385  | NLGN2    | ENSG00000169992 | neuroligin 2                                                                     | yes            | yes            | ---                   | ---                  |

|         |          |                 |                                                                                |     |     |     |     |
|---------|----------|-----------------|--------------------------------------------------------------------------------|-----|-----|-----|-----|
| 8004571 | EFNB3    | ENSG00000108947 | ephrin-B3                                                                      | yes | yes | --- | --- |
| 8005865 | SARM1    | ENSG00000004139 | sterile alpha and TIR motif containing 1                                       | yes | yes | --- | --- |
| 8007323 | CNTNAP1  | ENSG00000108797 | contactin associated protein 1                                                 | yes | yes | --- | --- |
| 8012883 | HS3ST3A1 | ENSG00000153976 | heparan sulfate (glucosamine) 3-O-sulfotransferase 3A1                         | yes | yes | --- | --- |
| 8019149 | SLC38A10 | ENSG00000157637 | solute carrier family 38, member 10                                            | yes | yes | --- | --- |
| 8025633 | PDE4A    | ENSG00000065989 | phosphodiesterase 4A, cAMP-specific                                            | yes | yes | --- | --- |
| 8029236 | MEGF8    | ENSG00000105429 | multiple EGF-like-domains 8                                                    | yes | yes | --- | --- |
| 8040473 | RHOB     | ENSG00000143878 | ras homolog family member B                                                    | yes | yes | --- | --- |
| 8040698 | SLC35F6  | ENSG00000213699 | solute carrier family 35, member F6                                            | yes | yes | --- | --- |
| 8057898 | HECW2    | ENSG00000138411 | HECT, C2 and WW domain containing E3 ubiquitin protein ligase 2                | yes | yes | --- | --- |
| 8062312 | MYL9     | ENSG00000101335 | myosin, light chain 9, regulatory                                              | yes | yes | --- | --- |
| 8068496 | SIM2     | ENSG00000159263 | single-minded homolog 2 (Drosophila)                                           | yes | yes | --- | --- |
| 8070632 | CBS      | ENSG00000160200 | cystathionine-beta-synthase                                                    | yes | yes | --- | --- |
| 8072108 | ASPHD2   | ENSG00000128203 | aspartate beta-hydroxylase domain containing 2                                 | yes | yes | --- | --- |
| 8075182 | XBP1     | ENSG00000100219 | X-box binding protein 1                                                        | yes | yes | --- | --- |
| 8076673 | LDOC1L   | ENSG00000188636 | leucine zipper, down-regulated in cancer 1-like                                | yes | yes | --- | --- |
| 8083240 | AGTR1    | ENSG00000144891 | angiotensin II receptor, type 1                                                | yes | yes | --- | --- |
| 8086985 | COL7A1   | ENSG00000114270 | collagen, type VII, alpha 1                                                    | yes | yes | --- | --- |
| 8087461 | AMIGO3   | ENSG00000176020 | adhesion molecule with Ig-like domain 3                                        | yes | yes | --- | --- |
| 8090162 | ITGB5    | ENSG00000082781 | integrin, beta 5                                                               | yes | yes | --- | --- |
| 8090823 | SLCO2A1  | ENSG00000174640 | solute carrier organic anion transporter family, member 2A1                    | yes | yes | --- | --- |
| 8092839 | LRRC15   | ENSG00000172061 | leucine rich repeat containing 15                                              | yes | yes | --- | --- |
| 8094056 | HTRA3    | ENSG00000170801 | HtrA serine peptidase 3                                                        | yes | yes | --- | --- |
| 8098995 | MXD4     | ENSG00000123933 | MAX dimerization protein 4                                                     | yes | yes | --- | --- |
| 8099340 | WDR1     | ENSG00000071127 | WD repeat domain 1                                                             | yes | yes | --- | --- |
| 8099912 | SMIM14   | ENSG00000163683 | small integral membrane protein 14                                             | yes | yes | --- | --- |
| 8106986 | RHOBTB3  | ENSG00000164292 | Rho-related BTB domain containing 3                                            | yes | yes | --- | --- |
| 8113726 | PPIC     | ENSG00000168938 | peptidylprolyl isomerase C (cyclophilin C)                                     | yes | yes | --- | --- |
| 8122982 | ZDHC14   | ENSG00000175048 | zinc finger, DHHC-type containing 14                                           | yes | yes | --- | --- |
| 8123181 | IGF2R    | ENSG00000197081 | insulin-like growth factor 2 receptor                                          | yes | yes | --- | --- |
| 8126574 | YIPF3    | ENSG00000137207 | Yip1 domain family, member 3                                                   | yes | yes | --- | --- |
| 8130598 | LPAL2    | ENSG00000213071 | lipoprotein, Lp(a)-like 2, pseudogene                                          | yes | yes | --- | --- |
| 8132031 | PRR15    | ENSG00000176532 | proline rich 15                                                                | yes | yes | --- | --- |
| 8134880 | MOSPD3   | ENSG00000106330 | motile sperm domain containing 3                                               | yes | yes | --- | --- |
| 8135990 | FLNC     | ENSG00000128591 | filamin C, gamma                                                               | yes | yes | --- | --- |
| 8136918 | ZYX      | ENSG00000159840 | zyxin                                                                          | yes | yes | --- | --- |
| 8143307 | HIPK2    | ENSG00000064393 | homeodomain interacting protein kinase 2                                       | yes | yes | --- | --- |
| 8144786 | SLC7A2   | ENSG00000003989 | solute carrier family 7 (cationic amino acid transporter, y+ system), member 2 | yes | yes | --- | --- |

|         |           |                 |                                                                |     |     |     |     |
|---------|-----------|-----------------|----------------------------------------------------------------|-----|-----|-----|-----|
| 8144802 | PDGFRL    | ENSG00000104213 | platelet-derived growth factor receptor-like                   | yes | yes | --- | --- |
| 8149877 | PNMA2     | ENSG00000240694 | paraneoplastic Ma antigen 2                                    | yes | yes | --- | --- |
| 8155096 | CREB3     | ENSG00000107175 | cAMP responsive element binding protein 3                      | yes | yes | --- | --- |
| 8155169 | RECK      | ENSG00000122707 | reversion-inducing-cysteine-rich protein with kazal motifs     | yes | yes | --- | --- |
| 8164343 | FAM102A   | ENSG00000167106 | family with sequence similarity 102, member A                  | yes | yes | --- | --- |
| 8165077 | NACC2     | ENSG00000148411 | NACC family member 2, BEN and BTB (POZ) domain containing      | yes | yes | --- | --- |
| 8162117 | GOLM1     | ENSG00000135052 | golgi membrane protein 1                                       | yes | yes | --- | --- |
| 8164217 | FAM129B   | ENSG00000136830 | family with sequence similarity 129, member B                  | yes | yes | --- | --- |
| 8165258 | AGPAT2    | ENSG00000169692 | 1-acylglycerol-3-phosphate O-acyltransferase 2                 | yes | yes | --- | --- |
| 8170009 | FAM127A   | ENSG00000134590 | family with sequence similarity 127, member A                  | yes | yes | --- | --- |
| 8170704 | ABCD1     | ENSG00000101986 | ATP-binding cassette, sub-family D (ALD), member 1             | yes | yes | --- | --- |
| 8175574 | SLITRK4   | ENSG00000179542 | SLIT and NTRK-like family, member 4                            | yes | yes | --- | --- |
| 8176026 | FLNA      | ENSG00000196924 | filamin A, alpha                                               | yes | yes | --- | --- |
| 7939237 | KIAA1549L | ENSG00000110427 | KIAA1549-like                                                  | yes | yes | --- | --- |
| 8141791 | POLR2J3   | ENSG00000168255 | polymerase (RNA) II (DNA directed) polypeptide J3              | yes | yes | --- | --- |
| 8013157 | TOM1L2    | ENSG00000175662 | target of myb1-like 2 (chicken)                                | yes | yes | --- | --- |
| 7898693 | ALPL      | ENSG00000162551 | alkaline phosphatase, liver/bone/kidney                        | yes | yes | --- | --- |
| 7916493 | PPAP2B    | ENSG00000162407 | phosphatidic acid phosphatase type 2B                          | yes | yes | --- | --- |
| 7930208 | INA       | ENSG00000148798 | internexin neuronal intermediate filament protein, alpha       | yes | yes | --- | --- |
| 8145865 | GPR124    | ENSG00000020181 | G protein-coupled receptor 124                                 | yes | yes | --- | --- |
| 8147777 | CTHRC1    | ENSG00000164932 | collagen triple helix repeat containing 1                      | yes | yes | --- | --- |
| 7904158 | HIPK1     | ENSG00000163349 | homeodomain interacting protein kinase 1                       | yes | yes | --- | yes |
| 7906469 | DUSP23    | ENSG00000158716 | dual specificity phosphatase 23                                | yes | yes | --- | yes |
| 7908041 | LAMC1     | ENSG00000135862 | laminin, gamma 1 (formerly LAMB2)                              | yes | yes | --- | yes |
| 7908125 | RGL1      | ENSG00000143344 | ral guanine nucleotide dissociation stimulator-like 1          | yes | yes | --- | yes |
| 7909789 | TGFB2     | ENSG00000092969 | transforming growth factor, beta 2                             | yes | yes | --- | yes |
| 7913237 | CAMK2N1   | ENSG00000162545 | calcium/calmodulin-dependent protein kinase II inhibitor 1     | yes | yes | --- | yes |
| 7913566 | HTR1D     | ENSG00000179546 | 5-hydroxytryptamine (serotonin) receptor 1D, G protein-coupled | yes | yes | --- | yes |
| 7914467 | SPOCD1    | ENSG00000134668 | SPOC domain containing 1                                       | yes | yes | --- | yes |
| 7923183 | ZNF281    | ENSG00000162702 | zinc finger protein 281                                        | yes | yes | --- | yes |
| 7923991 | PLXNA2    | ENSG00000076356 | plexin A2                                                      | yes | yes | --- | yes |
| 7932985 | NRP1      | ENSG00000099250 | neuropilin 1                                                   | yes | yes | --- | yes |
| 7927747 | ZNF365    |                 |                                                                | yes | yes | --- | yes |
| 7927827 | MYPN      | ENSG00000138347 | myopalladin                                                    | yes | yes | --- | yes |
| 7934690 | ZCCHC24   | ENSG00000165424 | zinc finger, CCHC domain containing 24                         | yes | yes | --- | yes |
| 7930106 | TMEM180   | ENSG00000243628 |                                                                | yes | yes | --- | yes |
| 7930194 | CNNM2     | ENSG00000148842 | cyclin M2                                                      | yes | yes | --- | yes |
| 7931097 | HTRA1     | ENSG00000166033 | HtrA serine peptidase 1                                        | yes | yes | --- | yes |

|         |           |                 |                                                                                       |     |     |     |     |
|---------|-----------|-----------------|---------------------------------------------------------------------------------------|-----|-----|-----|-----|
| 7932453 | NEBL      | ENSG00000078114 | nebulette                                                                             | yes | yes | --- | yes |
| 7934906 | ACTA2     | ENSG00000107796 | actin, alpha 2, smooth muscle, aorta                                                  | yes | yes | --- | yes |
| 7936242 | ITPRIP    | ENSG00000148841 | inositol 1,4,5-trisphosphate receptor interacting protein                             | yes | yes | --- | yes |
| 7938834 | NAV2      | ENSG00000166833 | neuron navigator 2                                                                    | yes | yes | --- | yes |
| 7940904 | VEGFB     | ENSG00000173511 | vascular endothelial growth factor B                                                  | yes | yes | --- | yes |
| 7945680 | H19       | ENSG00000130600 | H19, imprinted maternally expressed transcript (non-protein coding)                   | yes | yes | --- | yes |
| 7945688 | IGF2      | ENSG00000167244 | insulin-like growth factor 2 (somatomedin A)                                          | yes | yes | --- | yes |
| 7947462 | ABTB2     | ENSG00000166016 | ankyrin repeat and BTB (POZ) domain containing 2                                      | yes | yes | --- | yes |
| 7949412 | LTBP3     | ENSG00000168056 | latent transforming growth factor beta binding protein 3                              | yes | yes | --- | yes |
| 7950374 | P4HA3     | ENSG00000149380 | prolyl 4-hydroxylase, alpha polypeptide III                                           | yes | yes | --- | yes |
| 7952268 | THY1      | ENSG00000154096 | Thy-1 cell surface antigen                                                            | yes | yes | --- | yes |
| 7958174 | TXNRD1    | ENSG00000198431 | thioredoxin reductase 1                                                               | yes | yes | --- | yes |
| 7958202 | CHST11    | ENSG00000171310 | carbohydrate (chondroitin 4) sulfotransferase 11                                      | yes | yes | --- | yes |
| 7959957 | ULK1      | ENSG00000177169 | unc-51 like autophagy activating kinase 1                                             | yes | yes | --- | yes |
| 7962659 | HDAC7     | ENSG00000061273 | histone deacetylase 7                                                                 | yes | yes | --- | yes |
| 7963054 | TUBA1A    | ENSG00000167552 | tubulin, alpha 1a                                                                     | yes | yes | --- | yes |
| 7963235 | CSRNP2    | ENSG00000110925 | cysteine-serine-rich nuclear protein 2                                                | yes | yes | --- | yes |
| 7965359 | ATP2B1    | ENSG00000070961 | ATPase, Ca++ transporting, plasma membrane 1                                          | yes | yes | --- | yes |
| 7965573 | NTN4      | ENSG00000074527 | netrin 4                                                                              | yes | yes | --- | yes |
| 7966003 | APPL2     | ENSG00000136044 | adaptor protein, phosphotyrosine interaction, PH domain and leucine zipper containing | yes | yes | --- | yes |
| 7966035 | CKAP4     | ENSG00000136026 | cytoskeleton-associated protein 4                                                     | yes | yes | --- | yes |
| 7970301 | TMCO3     | ENSG00000150403 | transmembrane and coiled-coil domains 3                                               | yes | yes | --- | yes |
| 7975799 | FLVCR2    | ENSG00000119686 | feline leukemia virus subgroup C cellular receptor family, member 2                   | yes | yes | --- | yes |
| 7976556 | C14orf132 | ENSG00000227051 | chromosome 14 open reading frame 132                                                  | yes | yes | --- | yes |
| 7977294 | ZBTB42    | ENSG00000179627 | zinc finger and BTB domain containing 42                                              | yes | yes | --- | yes |
| 7977965 | SLC22A17  | ENSG00000092096 | solute carrier family 22, member 17                                                   | yes | yes | --- | yes |
| 7984771 | LOXL1     | ENSG00000129038 | lysyl oxidase-like 1                                                                  | yes | yes | --- | yes |
| 7990345 | SEMA7A    | ENSG00000138623 | semaphorin 7A, GPI membrane anchor (John Milton Hagen blood group)                    | yes | yes | --- | yes |
| 7993349 | NPIPP1    | ENSG00000188599 | nuclear pore complex interacting protein pseudogene 1                                 | yes | yes | --- | yes |
| 7999614 | PKD1P5    | ENSG00000254681 | polycystic kidney disease 1 (autosomal dominant) pseudogene 5                         | yes | yes | --- | yes |
| 7993458 | C16orf45  | ENSG00000166780 | chromosome 16 open reading frame 45                                                   | yes | yes | --- | yes |
| 7995895 | HERPUD1   | ENSG00000051108 | homocysteine-inducible, endoplasmic reticulum stress-inducible, ubiquitin-like domain | yes | yes | --- | yes |
| 8003180 | ZDHC7     | ENSG00000153786 | zinc finger, DHHC-type containing 7                                                   | yes | yes | --- | yes |
| 8003639 | WDR81     | ENSG00000167716 | WD repeat domain 81                                                                   | yes | yes | --- | yes |
| 8005097 | HS3ST3B1  | ENSG00000125430 | heparan sulfate (glucosamine) 3-O-sulfotransferase 3B1                                | yes | yes | --- | yes |
| 8008933 | BCAS3     | ENSG00000141376 | breast carcinoma amplified sequence 3                                                 | yes | yes | --- | yes |
| 8010061 | SPHK1     | ENSG00000176170 | sphingosine kinase 1                                                                  | yes | yes | --- | yes |
| 8010770 | SLC16A3   | ENSG00000141526 | solute carrier family 16, member 3 (monocarboxylic acid transporter 4)                | yes | yes | --- | yes |

|         |          |                 |                                                     |     |     |     |     |
|---------|----------|-----------------|-----------------------------------------------------|-----|-----|-----|-----|
| 8010897 | METRNL   | ENSG00000176845 | meteorin, glial cell differentiation regulator-like | yes | yes | --- | yes |
| 8011924 | ACKR6    | ENSG00000091622 | atypical chemokine receptor 6                       | yes | yes | --- | yes |
| 8018966 | TIMP2    | ENSG00000035862 | TIMP metalloproteinase inhibitor 2                  | yes | yes | --- | yes |
| 8018972 | 0        | ENSG00000178404 | Protein DDC8 homolog                                | yes | yes | --- | yes |
| 8021707 | SOCS6    | ENSG00000170677 | suppressor of cytokine signaling 6                  | yes | yes | --- | yes |
| 8023995 | FSTL3    | ENSG00000070404 | folliculin-like 3 (secreted glycoprotein)           | yes | yes | --- | yes |
| 8024003 | PALM     | ENSG00000099864 | paralemmin                                          | yes | yes | --- | yes |
| 8025183 | MCOLN1   | ENSG00000090674 | mucopolysaccharin 1                                 | yes | yes | --- | yes |
| 8026047 | JUNB     | ENSG00000171223 | jun B proto-oncogene                                | yes | yes | --- | yes |
| 8027049 | KLHL26   | ENSG00000167487 | kelch-like family member 26                         | yes | yes | --- | yes |
| 8032214 | GAMT     | ENSG00000130005 | guanidinoacetate N-methyltransferase                | yes | yes | --- | yes |
| 8033241 | CD70     | ENSG00000125726 | CD70 molecule                                       | yes | yes | --- | yes |
| 8035506 | CRLF1    | ENSG00000060616 | cytokine receptor-like factor 1                     | yes | yes | --- | yes |
| 8037737 | NOVA2    | ENSG00000104967 | neuro-oncological ventral antigen 2                 | yes | yes | --- | yes |
| 8040365 | TRIB2    | ENSG00000071575 | tribbles homolog 2 (Drosophila)                     | yes | yes | --- | yes |
| 8042576 | NAGK     | ENSG00000124357 | N-acetylglucosaminase                               | yes | yes | --- | yes |
| 8044258 | LIMS1    | ENSG00000169756 | LIM and senescent cell antigen-like domains 1       | yes | yes | --- | yes |
| 8046861 | ITGAV    | ENSG00000138448 | integrin, alpha V                                   | yes | yes | --- | yes |
| 8052803 | AAK1     | ENSG00000115977 | AP2 associated kinase 1                             | yes | yes | --- | yes |
| 8053449 | TMEM150A | ENSG00000168890 | transmembrane protein 150A                          | yes | yes | --- | yes |
| 8054377 | FHL2     | ENSG00000115641 | four and a half LIM domains 2                       | yes | yes | --- | yes |
| 8054945 | BIN1     | ENSG00000136717 | bridging integrator 1                               | yes | yes | --- | yes |
| 8055038 | LIMS2    | ENSG00000072163 | LIM and senescent cell antigen-like domains 2       | yes | yes | --- | yes |
| 8059650 | SP110    | ENSG00000135899 | SP110 nuclear body protein                          | yes | yes | --- | yes |
| 8061542 | HM13     | ENSG00000101294 | histocompatibility (minor) 13                       | yes | yes | --- | yes |
| 8062034 | TP53INP2 | ENSG00000078804 | tumor protein p53 inducible nuclear protein 2       | yes | yes | --- | yes |
| 8063796 | CDH4     | ENSG00000179242 | cadherin 4, type 1, R-cadherin (retinal)            | yes | yes | --- | yes |
| 8066905 | ZNF1     | ENSG00000124201 | zinc finger, NFX1-type containing 1                 | yes | yes | --- | yes |
| 8067233 | PMEPA1   | ENSG00000124225 | prostate transmembrane protein, androgen induced 1  | yes | yes | --- | yes |
| 8067652 | EEF1A2   | ENSG00000101210 | eukaryotic translation elongation factor 1 alpha 2  | yes | yes | --- | yes |
| 8069269 | COL6A1   | ENSG00000142156 | collagen, type VI, alpha 1                          | yes | yes | --- | yes |
| 8069301 | COL6A2   | ENSG00000142173 | collagen, type VI, alpha 2                          | yes | yes | --- | yes |
| 8070194 | RUNX1    | ENSG00000159216 | runt-related transcription factor 1                 | yes | yes | --- | yes |
| 8074063 | ADM2     | ENSG00000128165 | adrenomedullin 2                                    | yes | yes | --- | yes |
| 8074617 | SCARF2   | ENSG00000244486 | scavenger receptor class F, member 2                | yes | yes | --- | yes |
| 8075720 | APOL2    | ENSG00000128335 | apolipoprotein L, 2                                 | yes | yes | --- | yes |
| 8076241 | MKL1     | ENSG00000196588 | megakaryoblastic leukemia (translocation) 1         | yes | yes | --- | yes |
| 8077441 | BHLHE40  | ENSG00000134107 | basic helix-loop-helix family, member e40           | yes | yes | --- | yes |

|         |          |                   |                                                                                               |       |     |     |     |
|---------|----------|-------------------|-----------------------------------------------------------------------------------------------|-------|-----|-----|-----|
| 8078014 | SLC6A6   | ENSG00000131389   | solute carrier family 6 (neurotransmitter transporter, taurine), member 6                     | yes   | yes | --- | yes |
| 8083901 | FNDC3B   | ENSG00000075420   | fibronectin type III domain containing 3B                                                     | yes   | yes | --- | yes |
| 8085138 | OXTR     | ENSG00000180914   | oxytocin receptor                                                                             | yes   | yes | --- | yes |
| 8086051 | SUSD5    | ENSG00000173705   | sushi domain containing 5                                                                     | yes   | yes | --- | yes |
| 8099897 | UGDH     | ENSG00000109814   | UDP-glucose 6-dehydrogenase                                                                   | yes   | yes | --- | yes |
| 8101158 | SCARB2   | ENSG00000138760   | scavenger receptor class B, member 2                                                          | yes   | yes | --- | yes |
| 8104601 | BASP1    | ENSG00000176788   | brain abundant, membrane attached signal protein 1                                            | yes   | yes | --- | yes |
| 8109612 | ADRA1B   | ENSG00000170214   | adrenoceptor alpha 1B                                                                         | yes   | yes | --- | yes |
| 8110569 | SQSTM1   | ENSG00000161011   | sequestosome 1                                                                                | yes   | yes | --- | yes |
| 8110783 | TERT     | ENSG00000164362   | telomerase reverse transcriptase                                                              | yes   | yes | --- | yes |
| 8115814 | SH3PXD2B | ENSG00000174705   | SH3 and PX domains 2B                                                                         | yes   | yes | --- | yes |
| 8116051 | DBN1     | ENSG00000113758   | drebrin 1                                                                                     | yes   | yes | --- | yes |
| 8117054 | CAP2     | ENSG00000112186   | CAP, adenylate cyclase-associated protein, 2 (yeast)                                          | yes   | yes | --- | yes |
| 8120043 | RUNX2    | ENSG00000124813   | runt-related transcription factor 2                                                           | yes   | yes | --- | yes |
| 8122099 | ENPP1    | ENSG00000197594   | ectonucleotide pyrophosphatase/phosphodiesterase 1                                            | yes   | yes | --- | yes |
| 8124413 | HIST1H4D | ENSG00000188987   | histone cluster 1, H4d                                                                        | yes   | yes | --- | yes |
| 8124448 | HIST1H4H | ENSG00000158406   | histone cluster 1, H4h                                                                        | yes   | yes | --- | yes |
| 8179819 | DDAH2    | ENSG00000213722   | dimethylarginine dimethylaminohydrolase 2                                                     | yes   | yes | --- | yes |
| 8125139 | NEU1     | ENSG00000204386   | sialidase 1 (lysosomal sialidase)                                                             | yes   | yes | --- | yes |
| 8129418 | PTPRK    | ENSG00000152894   | protein tyrosine phosphatase, receptor type, K                                                | yes   | yes | --- | yes |
| 8130739 | RPS6KA2  | ENSG00000071242   | ribosomal protein S6 kinase, 90kDa, polypeptide 2                                             | yes   | yes | --- | yes |
| 8135069 | SERPINE1 | ENSG00000106366   | serpin peptidase inhibitor, clade E (nexin, plasminogen activator inhibitor type 1), member 1 | yes   | yes | --- | yes |
| 8149774 | LOXL2    | ENSG00000134013   | lysyl oxidase-like 2                                                                          | yes   | yes | --- | yes |
| 8150036 | KIF13B   | ENSG00000197892   | kinesin family member 13B                                                                     | yes   | yes | --- | yes |
| 8152703 | FBXO32   | ENSG00000156804   | F-box protein 32                                                                              | yes   | yes | --- | yes |
| 8154491 | ADAMTSL1 | ENSG00000178031   | ADAMTS-like 1                                                                                 | yes   | yes | --- | yes |
| 8156278 | C9orf47  | ENSG00000186354   | chromosome 9 open reading frame 47                                                            | yes   | yes | --- | yes |
| 8158240 | TMSB4XP1 | ENSG00000236876   | thymosin beta 4, X-linked pseudogene 1                                                        | yes   | yes | --- | yes |
| 8161044 | TPM2     | ENSG00000198467   | tropomyosin 2 (beta)                                                                          | yes   | yes | --- | yes |
| 8164269 | ENG      | ENSG00000106991   | endoglin                                                                                      | yes   | yes | --- | yes |
| 8168424 | SLC16A2  | ENSG00000147100   | solute carrier family 16, member 2 (thyroid hormone transporter)                              | yes   | yes | --- | yes |
| 8172043 | SRPX     | ENSG00000101955   | sushi-repeat containing protein, X-linked                                                     | yes   | yes | --- | yes |
| 8175288 | MOSPD1   | ENSG00000101928   | motile sperm domain containing 1                                                              | yes   | yes | --- | yes |
| 8175593 | IDS      | ENSG00000010404   | iduronate 2-sulfatase                                                                         | yes   | yes | --- | yes |
| 8115732 |          |                   |                                                                                               | yes   | yes | --- | yes |
| 8052798 |          | 0 ENSG00000188971 |                                                                                               | 0 yes | yes | --- | yes |
| 7989037 | CCPG1    | ENSG00000260916   | cell cycle progression 1                                                                      | yes   | yes | --- | yes |
| 7993359 | NPIPP1   | ENSG00000188599   | nuclear pore complex interacting protein pseudogene 1                                         | yes   | yes | --- | yes |

|         |            |                 |                                                                                               |     |     |     |     |
|---------|------------|-----------------|-----------------------------------------------------------------------------------------------|-----|-----|-----|-----|
| 8178590 | DDAH2      | ENSG00000213722 | dimethylarginine dimethylaminohydrolase 2                                                     | yes | yes | --- | yes |
| 7999634 | PKD1P5     | ENSG00000254681 | polycystic kidney disease 1 (autosomal dominant) pseudogene 5                                 | yes | yes | --- | yes |
| 8125048 | DDAH2      | ENSG00000213722 | dimethylarginine dimethylaminohydrolase 2                                                     | yes | yes | --- | yes |
| 8152491 | EXT1       | ENSG00000182197 | exostosin glycosyltransferase 1                                                               | yes | yes | --- | yes |
| 8013307 | FOXO3B     | ENSG00000240445 | forkhead box O3B pseudogene                                                                   | yes | yes | --- | yes |
| 8044295 | SH3RF3     | ENSG00000172985 | SH3 domain containing ring finger 3                                                           | yes | yes | --- | yes |
| 7997765 | ZNF469     | ENSG00000225614 | zinc finger protein 469                                                                       | yes | yes | --- | yes |
| 8179851 | NEU1       | ENSG00000204386 | sialidase 1 (lysosomal sialidase)                                                             | yes | yes | --- | yes |
| 8178676 | NEU1       | ENSG00000204386 | sialidase 1 (lysosomal sialidase)                                                             | yes | yes | --- | yes |
| 8006779 | ARHGAP23   | ENSG00000225485 | Rho GTPase activating protein 23                                                              | yes | yes | --- | yes |
| 8067007 | TMSB4XP1   | ENSG00000236876 | thymosin beta 4, X-linked pseudogene 1                                                        | yes | yes | --- | yes |
| 8052204 | RTN4       | ENSG00000115310 | reticulon 4                                                                                   | yes | yes | --- | yes |
| 7917232 | GNG5       | ENSG00000174021 | guanine nucleotide binding protein (G protein), gamma 5                                       | yes | yes | --- | yes |
| 7946245 | DCHS1      | ENSG00000166341 | dachsous 1 (Drosophila)                                                                       | yes | yes | --- | yes |
| 8093413 | TMEM175    | ENSG00000127419 | transmembrane protein 175                                                                     | yes | yes | --- | yes |
| 8165492 | RNF208     | ENSG00000212864 | ring finger protein 208                                                                       | yes | yes | --- | yes |
| 7993404 | NPIPP1     | ENSG00000188599 | nuclear pore complex interacting protein pseudogene 1                                         | yes | yes | --- | yes |
| 8165637 | RNF208     | ENSG00000212864 | ring finger protein 208                                                                       | yes | yes | --- | yes |
| 7927146 | CSGALNACT2 | ENSG00000169826 | chondroitin sulfate N-acetylgalactosaminyltransferase 2                                       | yes | yes | yes | yes |
| 7927631 | DKK1       | ENSG00000107984 | dickkopf WNT signaling pathway inhibitor 1                                                    | yes | yes | yes | yes |
| 7934570 | KCNMA1     | ENSG00000156113 | potassium large conductance calcium-activated channel, subfamily M, alpha member              | yes | yes | yes | yes |
| 7963786 | ITGA5      | ENSG00000161638 | integrin, alpha 5 (fibronectin receptor, alpha polypeptide)                                   | yes | yes | yes | yes |
| 7968417 | FRY        | ENSG00000073910 | furry homolog (Drosophila)                                                                    | yes | yes | yes | yes |
| 7969060 | FNDC3A     | ENSG00000102531 | fibronectin type III domain containing 3A                                                     | yes | yes | yes | yes |
| 8000574 | NUPR1      | ENSG00000176046 | nuclear protein, transcriptional regulator, 1                                                 | yes | yes | yes | yes |
| 8007141 | EIF1       | ENSG00000173812 | eukaryotic translation initiation factor 1                                                    | yes | yes | yes | yes |
| 8056005 | ACVR1      | ENSG00000115170 | activin A receptor, type I                                                                    | yes | yes | yes | yes |
| 8059376 | SERPINE2   | ENSG00000135919 | serpin peptidase inhibitor, clade E (nexin, plasminogen activator inhibitor type 1), member 2 | yes | yes | yes | yes |
| 8077458 | EDEM1      | ENSG00000134109 | ER degradation enhancer, mannosidase alpha-like 1                                             | yes | yes | yes | yes |
| 8085665 | RFTN1      | ENSG00000131378 | raftlin, lipid raft linker 1                                                                  | yes | yes | yes | yes |
| 8102800 | SLC7A11    | ENSG00000151012 | solute carrier family 7 (anionic amino acid transporter light chain, xc- system), member 1    | yes | yes | yes | yes |
| 8101828 | TSPAN5     | ENSG00000168785 | tetraspanin 5                                                                                 | yes | yes | yes | yes |
| 8106098 | MAP1B      | ENSG00000131711 | microtubule-associated protein 1B                                                             | yes | yes | yes | yes |
| 8124040 | ATXN1      | ENSG00000124788 | ataxin 1                                                                                      | yes | yes | yes | yes |
| 8135480 | DNAJB9     | ENSG00000128590 | DnaJ (Hsp40) homolog, subfamily B, member 9                                                   | yes | yes | yes | yes |
| 8139656 | GRB10      | ENSG00000106070 | growth factor receptor-bound protein 10                                                       | yes | yes | yes | yes |
| 8141150 | ASNS       | ENSG00000070669 | asparagine synthetase (glutamine-hydrolyzing)                                                 | yes | yes | yes | yes |
| 8151816 | GEM        | ENSG00000164949 | GTP binding protein overexpressed in skeletal muscle                                          | yes | yes | yes | yes |

Induced with TGF and P1

Induced with TGF

|         |           |                 |                                                                                      |       |     |     |     |    |                                 |
|---------|-----------|-----------------|--------------------------------------------------------------------------------------|-------|-----|-----|-----|----|---------------------------------|
| 8163002 | KLF4      | ENSG00000136826 | Kruppel-like factor 4 (gut)                                                          | yes   | yes | yes | yes | MA | and more in CSC than NS or NCSC |
| 8136807 | PRSS3P1   | ENSG00000250591 | protease, serine, 3 pseudogene 1                                                     | yes   | yes | yes | yes |    |                                 |
| 8085867 | NEK10     | ENSG00000163491 | NIMA-related kinase 10                                                               | ---   | yes | yes | yes |    |                                 |
| 7958200 | EID3      | ENSG00000255150 | EP300 interacting inhibitor of differentiation 3                                     | ---   | yes | yes | yes |    |                                 |
| 7968577 | NBEA      | ENSG00000172915 | neurobeachin                                                                         | ---   | yes | yes | yes |    |                                 |
| 7979204 | FERMT2    | ENSG00000073712 | fermitin family member 2                                                             | ---   | yes | yes | yes |    |                                 |
| 8047097 | GLS       | ENSG00000115419 | glutaminase                                                                          | ---   | yes | yes | yes |    |                                 |
| 8057700 | ORMDL1    | ENSG00000128699 | ORM1-like 1 ( <i>S. cerevisiae</i> )                                                 | ---   | yes | yes | yes |    |                                 |
| 8069487 | BAGE2     | ENSG00000187172 | B melanoma antigen family, member 2                                                  | ---   | yes | yes | yes |    |                                 |
| 8069532 | HSPA13    | ENSG00000155304 | heat shock protein 70kDa family, member 13                                           | ---   | yes | yes | yes |    |                                 |
| 8091283 | PLOD2     | ENSG00000152952 | procollagen-lysine, 2-oxoglutarate 5-dioxygenase 2                                   | ---   | yes | yes | yes |    |                                 |
| 8102619 | ANXA5     | ENSG00000164111 | annexin A5                                                                           | ---   | yes | yes | yes |    |                                 |
| 8103951 | ACSL1     | ENSG00000151726 | acyl-CoA synthetase long-chain family member 1                                       | ---   | yes | yes | yes |    |                                 |
| 8108217 | TGFBI     | ENSG00000120708 | transforming growth factor, beta-induced, 68kDa                                      | ---   | yes | yes | yes |    |                                 |
| 8113914 | FNIP1     | ENSG00000217128 | folliculin interacting protein 1                                                     | ---   | yes | yes | yes |    |                                 |
| 8132070 | GARS      | ENSG00000106105 | glycyl-tRNA synthetase                                                               | ---   | yes | yes | yes |    |                                 |
| 8135514 | IFRD1     | ENSG00000006652 | interferon-related developmental regulator 1                                         | ---   | yes | yes | yes |    |                                 |
| 8150988 | ASPH      | ENSG00000198363 | aspartate beta-hydroxylase                                                           | ---   | yes | yes | yes |    |                                 |
| 8158242 | URM1      | ENSG00000167118 | ubiquitin related modifier 1                                                         | ---   | yes | yes | yes |    |                                 |
| 8164165 | HSPA5     | ENSG00000044574 | heat shock 70kDa protein 5 (glucose-regulated protein, 78kDa)                        | ---   | yes | yes | yes |    |                                 |
| 8074734 |           | ENSG00000188424 |                                                                                      | 0 --- | yes | yes | yes |    |                                 |
| 8174654 | KLHL13    | ENSG00000003096 | kelch-like family member 13                                                          | yes   | --- | yes | yes |    |                                 |
| 8141206 | BAIAP2L1  | ENSG00000006453 | BAI1-associated protein 2-like 1                                                     | yes   | --- | yes | yes |    |                                 |
| 8143341 | JHDM1D    | ENSG00000006459 | jumonji C domain containing histone demethylase 1 homolog D ( <i>S. cerevisiae</i> ) | yes   | --- | yes | yes |    |                                 |
| 8037374 | PLAUR     | ENSG00000011422 | plasminogen activator, urokinase receptor                                            | yes   | --- | yes | yes |    |                                 |
| 8150757 | RB1CC1    | ENSG00000023287 | RB1-inducible coiled-coil 1                                                          | yes   | --- | yes | yes |    |                                 |
| 7943413 | BIRC3     | ENSG00000023445 | baculoviral IAP repeat containing 3                                                  | yes   | --- | yes | yes |    |                                 |
| 7939341 | CD44      | ENSG00000026508 | CD44 molecule (Indian blood group)                                                   | yes   | --- | yes | yes |    |                                 |
| 8129861 | IFNGR1    | ENSG00000027697 | interferon gamma receptor 1                                                          | yes   | --- | yes | yes |    |                                 |
| 8085914 | SLC4A7    | ENSG00000033867 | solute carrier family 4, sodium bicarbonate cotransporter, member 7                  | yes   | --- | yes | yes |    |                                 |
| 8021301 | RAB27B    | ENSG00000041353 | RAB27B, member RAS oncogene family                                                   | yes   | --- | yes | yes |    |                                 |
| 8091385 | CP        | ENSG00000047457 | ceruloplasmin (ferroxidase)                                                          | yes   | --- | yes | yes |    |                                 |
| 8122317 | HEBP2     | ENSG00000051620 | heme binding protein 2                                                               | yes   | --- | yes | yes |    |                                 |
| 8098195 | MSMO1     | ENSG00000052802 | methylsterol monooxygenase 1                                                         | yes   | --- | yes | yes |    |                                 |
| 7908072 | LAMC2     | ENSG00000058085 | laminin, gamma 2                                                                     | yes   | --- | yes | yes |    |                                 |
| 8042503 | MXD1      | ENSG00000059728 | MAX dimerization protein 1                                                           | yes   | --- | yes | yes |    |                                 |
| 8092134 | PLD1      | ENSG00000075651 | phospholipase D1, phosphatidylcholine-specific                                       | yes   | --- | yes | yes |    |                                 |
| 8091715 | LXN       | ENSG00000079257 | latexin                                                                              | yes   | --- | yes | yes |    |                                 |
| 8030128 | PPP1R15A  | ENSG00000087074 | protein phosphatase 1, regulatory subunit 15A                                        | yes   | --- | yes | yes |    |                                 |
| 8118734 | ITPR3     | ENSG00000096433 | inositol 1,4,5-trisphosphate receptor, type 3                                        | yes   | --- | yes | yes |    |                                 |
| 7927082 | HSD17B7P2 | ENSG00000099251 | hydroxysteroid (17-beta) dehydrogenase 7 pseudogene 2                                | yes   | --- | yes | yes |    |                                 |



|         |          |                 |                                                                                         |     |     |     |     |
|---------|----------|-----------------|-----------------------------------------------------------------------------------------|-----|-----|-----|-----|
| 7974851 | HIF1A    | ENSG00000100644 | hypoxia inducible factor 1, alpha subunit (basic helix-loop-helix transcription factor) | yes | --- | yes | yes |
| 7996022 | CCL22    | ENSG00000102962 | chemokine (C-C motif) ligand 22                                                         | yes | --- | yes | yes |
| 7985317 | KIAA1199 | ENSG00000103888 | KIAA1199                                                                                | yes | --- | yes | yes |
| 7987454 | BMF      | ENSG00000104081 | Bcl2 modifying factor                                                                   | yes | --- | yes | yes |
| 8153002 | NDRG1    | ENSG00000104419 | N-myc downstream regulated 1                                                            | yes | --- | yes | yes |
| 8029086 | CEACAM5  | ENSG00000105388 | carcinoembryonic antigen-related cell adhesion molecule 5                               | yes | --- | yes | yes |
| 8142120 | NAMPT    | ENSG00000105835 | nicotinamide phosphoribosyltransferase                                                  | yes | --- | yes | yes |
| 8131614 | AHR      | ENSG00000106546 | aryl hydrocarbon receptor                                                               | yes | --- | yes | yes |
| 8161747 | ZFAND5   | ENSG00000107372 | zinc finger, AN1-type domain 5                                                          | yes | --- | yes | yes |
| 8005765 | WSB1     | ENSG00000109046 | WD repeat and SOCS box containing 1                                                     | yes | --- | yes | yes |
| 8095736 | AREG     | ENSG00000109321 | amphiregulin                                                                            | yes | --- | yes | yes |
| 8095744 | AREG     | ENSG00000109321 | amphiregulin                                                                            | yes | --- | yes | yes |
| 8094599 | KLF3     | ENSG00000109787 | Kruppel-like factor 3 (basic)                                                           | yes | --- | yes | yes |
| 7954388 | GOLT1B   | ENSG00000111711 | golgi transport 1B                                                                      | yes | --- | yes | yes |
| 8130556 | SOD2     | ENSG00000112096 | superoxide dismutase 2, mitochondrial                                                   | yes | --- | yes | yes |
| 8119898 | VEGFA    | ENSG00000112715 | vascular endothelial growth factor A                                                    | yes | --- | yes | yes |
| 8114572 | HBEGF    | ENSG00000113070 | heparin-binding EGF-like growth factor                                                  | yes | --- | yes | yes |
| 8043283 | KDM3A    | ENSG00000115548 | lysine (K)-specific demethylase 3A                                                      | yes | --- | yes | yes |
| 8044021 | IL1RL1   | ENSG00000115602 | interleukin 1 receptor-like 1                                                           | yes | --- | yes | yes |
| 8055688 | RND3     | ENSG00000115963 | Rho family GTPase 3                                                                     | yes | --- | yes | yes |
| 8041781 | EPAS1    | ENSG00000116016 | endothelial PAS domain protein 1                                                        | yes | --- | yes | yes |
| 7912157 | ERRFI1   | ENSG00000116285 | ERBB receptor feedback inhibitor 1                                                      | yes | --- | yes | yes |
| 7902227 | GADD45A  | ENSG00000116717 | growth arrest and DNA-damage-inducible, alpha                                           | yes | --- | yes | yes |
| 7918902 | CD58     | ENSG00000116815 | CD58 molecule                                                                           | yes | --- | yes | yes |
| 7906819 | ATF6     | ENSG00000118217 | activating transcription factor 6                                                       | yes | --- | yes | yes |
| 8113220 | ELL2     | ENSG00000118985 | elongation factor, RNA polymerase II, 2                                                 | yes | --- | yes | yes |
| 7929052 | IFIT3    | ENSG00000119917 | interferon-induced protein with tetratricopeptide repeats 3                             | yes | --- | yes | yes |
| 7929047 | IFIT2    | ENSG00000119922 | interferon-induced protein with tetratricopeptide repeats 2                             | yes | --- | yes | yes |
| 8060850 | BMP2     | ENSG00000125845 | bone morphogenetic protein 2                                                            | yes | --- | yes | yes |
| 8014956 | NR1D1    | ENSG00000126368 | nuclear receptor subfamily 1, group D, member 1                                         | yes | --- | yes | yes |
| 8003571 | PRDM7    | ENSG00000126856 | PR domain containing 7                                                                  | yes | --- | yes | yes |
| 8011270 | METTL16  | ENSG00000127804 | methyltransferase like 16                                                               | yes | --- | yes | yes |
| 8133788 | PTPN12   | ENSG00000127947 | protein tyrosine phosphatase, non-receptor type 12                                      | yes | --- | yes | yes |
| 8075981 | C22orf23 | ENSG00000128346 | chromosome 22 open reading frame 23                                                     | yes | --- | yes | yes |
| 8027002 | GDF15    | ENSG00000130513 | growth differentiation factor 15                                                        | yes | --- | yes | yes |
| 8173299 | EDA2R    | ENSG00000131080 | ectodysplasin A2 receptor                                                               | yes | --- | yes | yes |
| 7940775 | RARRES3  | ENSG00000133321 | retinoic acid receptor responder (tazarotene induced) 3                                 | yes | --- | yes | yes |
| 8077450 | ARL8B    | ENSG00000134108 | ADP-ribosylation factor-like 8B                                                         | yes | --- | yes | yes |
| 8040080 | RSAD2    | ENSG00000134321 | radical S-adenosyl methionine domain containing 2                                       | yes | --- | yes | yes |
| 8156228 | CTSL     | ENSG00000135047 | cathepsin L                                                                             | yes | --- | yes | yes |
| 7967117 | OASL     | ENSG00000135114 | 2'-5'-oligoadenylate synthetase-like                                                    | yes | --- | yes | yes |
| 7956989 | MDM2     | ENSG00000135679 | MDM2 oncogene, E3 ubiquitin protein ligase                                              | yes | --- | yes | yes |
| 7971461 | LCP1     | ENSG00000136167 | lymphocyte cytosolic protein 1 (L-plastin)                                              | yes | --- | yes | yes |
| 8146550 | SDCBP    | ENSG00000137575 | syndecan binding protein (syntenin)                                                     | yes | --- | yes | yes |
| 7951309 | MMP13    | ENSG00000137745 | matrix metalloproteinase 13 (collagenase 3)                                             | yes | --- | yes | yes |
| 7930413 | DUSP5    | ENSG00000138166 | dual specificity phosphatase 5                                                          | yes | --- | yes | yes |

|         |           |                 |                                                                                           |     |     |     |     |
|---------|-----------|-----------------|-------------------------------------------------------------------------------------------|-----|-----|-----|-----|
| 8096361 | HERC5     | ENSG00000138646 | HECT and RLD domain containing E3 ubiquitin protein ligase 5                              | yes | --- | yes | yes |
| 7962375 | PRICKLE1  | ENSG00000139174 | prickle homolog 1 (Drosophila)                                                            | yes | --- | yes | yes |
| 7962559 | SLC38A4   | ENSG00000139209 | solute carrier family 38, member 4                                                        | yes | --- | yes | yes |
| 7965040 | PHLDA1    | ENSG00000139289 | pleckstrin homology-like domain, family A, member 1                                       | yes | --- | yes | yes |
| 7965335 | DUSP6     | ENSG00000139318 | dual specificity phosphatase 6                                                            | yes | --- | yes | yes |
| 7981290 | WARS      | ENSG00000140105 | tryptophanyl-tRNA synthetase                                                              | yes | --- | yes | yes |
| 7990391 | CYP1A1    | ENSG00000140465 | cytochrome P450, family 1, subfamily A, polypeptide 1                                     | yes | --- | yes | yes |
| 8021470 | PMAIP1    | ENSG00000141682 | phorbol-12-myristate-13-acetate-induced protein 1                                         | yes | --- | yes | yes |
| 8030823 | IGLON5    | ENSG00000142549 | IgLON family member 5                                                                     | yes | --- | yes | yes |
| 7917338 | BCL10     | ENSG00000142867 | B-cell CLL/lymphoma 10                                                                    | yes | --- | yes | yes |
| 8044499 | SLC20A1   | ENSG00000144136 | solute carrier family 20 (phosphate transporter), member 1                                | yes | --- | yes | yes |
| 8058708 | ABCA12    | ENSG00000144452 | ATP-binding cassette, sub-family A (ABC1), member 12                                      | yes | --- | yes | yes |
| 8107520 | TNFAIP8   | ENSG00000145779 | tumor necrosis factor, alpha-induced protein 8                                            | yes | --- | yes | yes |
| 8132860 | EGFR      | ENSG00000146648 | epidermal growth factor receptor                                                          | yes | --- | yes | yes |
| 8147145 | ATP6V0D2  | ENSG00000147614 | ATPase, H+ transporting, lysosomal 38kDa, V0 subunit d2                                   | yes | --- | yes | yes |
| 8148184 | FAM83A    | ENSG00000147689 | family with sequence similarity 83, member A                                              | yes | --- | yes | yes |
| 8158167 | LCN2      | ENSG00000148346 | lipocalin 2                                                                               | yes | --- | yes | yes |
| 7932966 | ITGB1     | ENSG00000150093 | integrin, beta 1 (fibronectin receptor, beta polypeptide, antigen CD29 includes MDF2, yes | yes | --- | yes | yes |
| 7951686 | IL18      | ENSG00000150782 | interleukin 18 (interferon-gamma-inducing factor)                                         | yes | --- | yes | yes |
| 7931832 | AKR1C2    | ENSG00000151632 | aldo-keto reductase family 1, member C2                                                   | yes | --- | yes | yes |
| 8022559 | ANKRD29   | ENSG00000154065 | ankyrin repeat domain 29                                                                  | yes | --- | yes | yes |
| 8068593 | ETS2      | ENSG00000157557 | v-ets avian erythroblastosis virus E26 oncogene homolog 2                                 | yes | --- | yes | yes |
| 8117382 | HIST1H2BD | ENSG00000158373 | histone cluster 1, H2bd                                                                   | yes | --- | yes | yes |
| 8042942 | HK2       | ENSG00000159399 | hexokinase 2                                                                              | yes | --- | yes | yes |
| 8014316 | CCL5      | ENSG00000161570 | chemokine (C-C motif) ligand 5                                                            | yes | --- | yes | yes |
| 7912537 | DHRS3     | ENSG00000162496 | dehydrogenase/reductase (SDR family) member 3                                             | yes | --- | yes | yes |
| 7908793 | ELF3      | ENSG00000163435 | E74-like factor 3 (ets domain transcription factor, epithelial-specific )                 | yes | --- | yes | yes |
| 8091658 | CCNL1     | ENSG00000163660 | cyclin L1                                                                                 | yes | --- | yes | yes |
| 8084627 | C3orf65   | ENSG00000163915 | chromosome 3 open reading frame 65                                                        | yes | --- | yes | yes |
| 8093950 | S100P     | ENSG00000163993 | S100 calcium binding protein P                                                            | yes | --- | yes | yes |
| 8110032 | CREBRF    | ENSG00000164463 | CREB3 regulatory factor                                                                   | yes | --- | yes | yes |
| 8151457 | HEY1      | ENSG00000164683 | hairy/enhancer-of-split related with YRPW motif 1                                         | yes | --- | yes | yes |
| 8152512 | TNFRSF11B | ENSG00000164761 | tumor necrosis factor receptor superfamily, member 11b                                    | yes | --- | yes | yes |
| 8162276 | NFIL3     | ENSG00000165030 | nuclear factor, interleukin 3 regulated                                                   | yes | --- | yes | yes |
| 7958262 | TCP11L2   | ENSG00000166046 | t-complex 11, testis-specific-like 2                                                      | yes | --- | yes | yes |
| 7951259 | MMP10     | ENSG00000166670 | matrix metalloproteinase 10 (stromelysin 2)                                               | yes | --- | yes | yes |
| 8006531 | SLFN5     | ENSG00000166750 | schlafen family member 5                                                                  | yes | --- | yes | yes |
| 7984364 | SMAD3     | ENSG00000166949 | SMAD family member 3                                                                      | yes | --- | yes | yes |
| 7928308 | DDIT4     | ENSG00000168209 | DNA-damage-inducible transcript 4                                                         | yes | --- | yes | yes |
| 8091411 | TM4SF1    | ENSG00000169908 | transmembrane 4 L six family member 1                                                     | yes | --- | yes | yes |
| 8060758 | PRNP      | ENSG00000171867 | prion protein                                                                             | yes | --- | yes | yes |
| 8063386 | CEBPB     | ENSG00000172216 | CCAAT/enhancer binding protein (C/EBP), beta                                              | yes | --- | yes | yes |
| 8126629 | GTPBP2    | ENSG00000172432 | GTP binding protein 2                                                                     | yes | --- | yes | yes |
| 7962884 | RND1      | ENSG00000172602 | Rho family GTPase 1                                                                       | yes | --- | yes | yes |
| 8014298 | C17orf66  | ENSG00000172653 | chromosome 17 open reading frame 66                                                       | yes | --- | yes | yes |
| 7942118 | MYEOV     | ENSG00000172927 | myeloma overexpressed                                                                     | yes | --- | yes | yes |

|         |            |                   |                                                                              |       |     |     |     |
|---------|------------|-------------------|------------------------------------------------------------------------------|-------|-----|-----|-----|
| 8113214 | GLRX       | ENSG00000173221   | glutaredoxin (thioltransferase)                                              | yes   | --- | yes | yes |
| 8005473 |            | 0 ENSG00000174977 |                                                                              | 0 yes | --- | yes | yes |
| 7964460 | DDIT3      | ENSG00000175197   | DNA-damage-inducible transcript 3                                            | yes   | --- | yes | yes |
| 7999440 | PRM1       | ENSG00000175646   | protamine 1                                                                  | yes   | --- | yes | yes |
| 8151679 | DCAF4L2    | ENSG00000176566   | DDB1 and CUL4 associated factor 4-like 2                                     | yes   | --- | yes | yes |
| 8084206 | B3GNT5     | ENSG00000176597   | UDP-GlcNAc:betaGal beta-1,3-N-acetylglucosaminyltransferase 5                | yes   | --- | yes | yes |
| 8063337 | ZFAS1      | ENSG00000177410   | ZNFX1 antisense RNA 1                                                        | yes   | --- | yes | yes |
| 7965112 | PAWR       | ENSG00000177425   | PRKC, apoptosis, WT1, regulator                                              | yes   | --- | yes | yes |
| 8017555 | ERN1       | ENSG00000178607   | endoplasmic reticulum to nucleus signaling 1                                 | yes   | --- | yes | yes |
| 8049722 | GPR35      | ENSG00000178623   | G protein-coupled receptor 35                                                | yes   | --- | yes | yes |
| 7969472 | C13orf45   | ENSG00000178734   | chromosome 13 open reading frame 45                                          | yes   | --- | yes | yes |
| 8117372 | HIST1H2AC  | ENSG00000180573   | histone cluster 1, H2ac                                                      | yes   | --- | yes | yes |
| 8083457 | RAP2B      | ENSG00000181467   | RAP2B, member of RAS oncogene family                                         | yes   | --- | yes | yes |
| 8066574 | WFDC10B    | ENSG00000182931   | WAP four-disulfide core domain 10B                                           | yes   | --- | yes | yes |
| 7905067 | HIST2H4A   | ENSG00000183941   | histone cluster 2, H4a                                                       | yes   | --- | yes | yes |
| 7919627 | HIST2H4A   | ENSG00000183941   | histone cluster 2, H4a                                                       | yes   | --- | yes | yes |
| 7989493 | RPS27L     | ENSG00000185088   | ribosomal protein S27-like                                                   | yes   | --- | yes | yes |
| 7981514 | AHNAK2     | ENSG00000185567   | AHNAK nucleoprotein 2                                                        | yes   | --- | yes | yes |
| 8120992 | ZNF292     | ENSG00000188994   | zinc finger protein 292                                                      | yes   | --- | yes | yes |
| 7909332 | CD55       | ENSG00000196352   | CD55 molecule, decay accelerating factor for complement (Cromer blood group) | yes   | --- | yes | yes |
| 7951271 | MMP1       | ENSG00000196611   | matrix metalloproteinase 1 (interstitial collagenase)                        | yes   | --- | yes | yes |
| 8019798 | MAFG       | ENSG00000197063   | v-maf avian musculoaponeurotic fibrosarcoma oncogene homolog G               | yes   | --- | yes | yes |
| 8056222 | DPP4       | ENSG00000197635   | dipeptidyl-peptidase 4                                                       | yes   | --- | yes | yes |
| 7979179 | ERO1L      | ENSG00000197930   | ERO1-like (S. cerevisiae)                                                    | yes   | --- | yes | yes |
| 8118310 | HSPA1A     | ENSG00000204389   | heat shock 70kDa protein 1A                                                  | yes   | --- | yes | yes |
| 8179322 | HSPA1A     | ENSG00000204389   | heat shock 70kDa protein 1A                                                  | yes   | --- | yes | yes |
| 8178070 | LY6G6F     | ENSG00000204424   | lymphocyte antigen 6 complex, locus G6F                                      | yes   | --- | yes | yes |
| 8179309 | LY6G6F     | ENSG00000204424   | lymphocyte antigen 6 complex, locus G6F                                      | yes   | --- | yes | yes |
| 7937709 | KRTAP5-6   | ENSG00000205864   | keratin associated protein 5-6                                               | yes   | --- | yes | yes |
| 8094165 | HSP90AB2P  | ENSG00000205940   | heat shock protein 90kDa alpha (cytosolic), class B member 2, pseudogene     | yes   | --- | yes | yes |
| 8084739 |            | 0 ENSG00000213132 | Uncharacterized protein                                                      | yes   | --- | yes | yes |
| 8063531 | FAM209B    | ENSG00000213714   | family with sequence similarity 209, member B                                | yes   | --- | yes | yes |
| 7999360 | RPL21P28   | ENSG00000220749   | ribosomal protein L21 pseudogene 28                                          | yes   | --- | yes | yes |
| 8166509 | SUPT20HL2  | ENSG00000223611   | suppressor of Ty 20 homolog (S. cerevisiae)-like 2                           | yes   | --- | yes | yes |
| 8171844 | SUPT20HL2  | ENSG00000223611   | suppressor of Ty 20 homolog (S. cerevisiae)-like 2                           | yes   | --- | yes | yes |
| 7921344 | ELL2P1     | ENSG00000227295   | elongation factor, RNA polymerase II, 2 pseudogene 1                         | yes   | --- | yes | yes |
| 8105908 |            | 0 ENSG00000230847 |                                                                              | 0 yes | --- | yes | yes |
| 8005689 | USP32P2    | ENSG00000233327   | ubiquitin specific peptidase 32 pseudogene 2                                 | yes   | --- | yes | yes |
| 7948211 |            | 0 ENSG00000238692 | Small nucleolar RNA U13                                                      | yes   | --- | yes | yes |
| 7919584 | HIST2H2BB  | ENSG00000240929   | histone cluster 2, H2bb (pseudogene)                                         | yes   | --- | yes | yes |
| 8156905 | MSANTD3-TM | ENSG00000251349   | MSANTD3-TMEFF1 readthrough                                                   | yes   | --- | yes | yes |
| 8000217 |            | 0 ENSG00000254634 |                                                                              | 0 yes | --- | yes | yes |
| 7998405 | SSTR5-AS1  | ENSG00000261713   | SSTR5 antisense RNA 1                                                        | yes   | --- | yes | yes |
| 7948092 | LOC441601  |                   |                                                                              | yes   | --- | yes | yes |
| 8135585 |            |                   |                                                                              | yes   | --- | yes | yes |
| 8127158 | GCLC       | ENSG00000001084   | glutamate-cysteine ligase, catalytic subunit                                 | ---   | --- | yes | yes |

|         |         |                 |                                                                                     |     |     |     |     |
|---------|---------|-----------------|-------------------------------------------------------------------------------------|-----|-----|-----|-----|
| 8016745 | SPAG9   | ENSG00000008294 | sperm associated antigen 9                                                          | --- | --- | yes | yes |
| 8129953 | HIVP2   | ENSG00000010818 | human immunodeficiency virus type I enhancer binding protein 2                      | --- | --- | yes | yes |
| 8051707 | MAP4K3  | ENSG00000011566 | mitogen-activated protein kinase kinase kinase 3                                    | --- | --- | yes | yes |
| 8058127 | CLK1    | ENSG00000013441 | CDC-like kinase 1                                                                   | --- | --- | yes | yes |
| 7974870 | SNAPC1  | ENSG00000023608 | small nuclear RNA activating complex, polypeptide 1, 43kDa                          | --- | --- | yes | yes |
| 8128123 | RRAGD   | ENSG00000025039 | Ras-related GTP binding D                                                           | --- | --- | yes | yes |
| 8104788 | RAI14   | ENSG00000039560 | retinoic acid induced 14                                                            | --- | --- | yes | yes |
| 8166104 | OFD1    | ENSG00000046651 | oral-facial-digital syndrome 1                                                      | --- | --- | yes | yes |
| 7939434 | TTC17   | ENSG00000052841 | tetratricopeptide repeat domain 17                                                  | --- | --- | yes | yes |
| 8122672 | TAB2    | ENSG00000055208 | TGF-beta activated kinase 1/MAP3K7 binding protein 2                                | --- | --- | yes | yes |
| 7965652 | CDK17   | ENSG00000059758 | cyclin-dependent kinase 17                                                          | --- | --- | yes | yes |
| 7930276 | SLK     | ENSG00000065613 | STE20-like kinase                                                                   | --- | --- | yes | yes |
| 8127854 | ME1     | ENSG00000065833 | malic enzyme 1, NADP(+)-dependent, cytosolic                                        | --- | --- | yes | yes |
| 7980940 | ATXN3   | ENSG00000066427 | ataxin 3                                                                            | --- | --- | yes | yes |
| 7983763 | MAPK6   | ENSG00000069956 | mitogen-activated protein kinase 6                                                  | --- | --- | yes | yes |
| 7950838 | PICALM  | ENSG00000073921 | phosphatidylinositol binding clathrin assembly protein                              | --- | --- | yes | yes |
| 8128977 | TUBE1   | ENSG00000074935 | tubulin, epsilon 1                                                                  | --- | --- | yes | yes |
| 8092348 | LAMP3   | ENSG00000078081 | lysosomal-associated membrane protein 3                                             | --- | --- | yes | yes |
| 7926565 | MLLT10  | ENSG00000078403 | myeloid/lymphoid or mixed-lineage leukemia (trithorax homolog, Drosophila); translo | --- | --- | yes | yes |
| 8089062 | CLDND1  | ENSG00000080822 | claudin domain containing 1                                                         | --- | --- | yes | yes |
| 8081055 | CHMP2B  | ENSG00000083937 | charged multivesicular body protein 2B                                              | --- | --- | yes | yes |
| 8095163 | EXOC1   | ENSG00000090989 | exocyst complex component 1                                                         | --- | --- | yes | yes |
| 8130394 | RGS17   | ENSG00000091844 | regulator of G-protein signaling 17                                                 | --- | --- | yes | yes |
| 7973770 | SCFD1   | ENSG00000092108 | sec1 family domain containing 1                                                     | --- | --- | yes | yes |
| 7926851 | WAC     | ENSG00000095787 | WW domain containing adaptor with coiled-coil                                       | --- | --- | yes | yes |
| 8074364 | DGCR14  | ENSG00000100056 | DiGeorge syndrome critical region gene 14                                           | --- | --- | yes | yes |
| 8076436 | TCF20   | ENSG00000100207 | transcription factor 20 (AR1)                                                       | --- | --- | yes | yes |
| 7980833 | SMEK1   | ENSG00000100796 | SMEK homolog 1, suppressor of mek1 (Dictyostelium)                                  | --- | --- | yes | yes |
| 7980923 | TRIP11  | ENSG00000100815 | thyroid hormone receptor interactor 11                                              | --- | --- | yes | yes |
| 8062890 | PABPC1L | ENSG00000101104 | poly(A) binding protein, cytoplasmic 1-like                                         | --- | --- | yes | yes |
| 8063453 | PFDN4   | ENSG00000101132 | prefoldin subunit 4                                                                 | --- | --- | yes | yes |
| 8020068 | ANKRD12 | ENSG00000101745 | ankyrin repeat domain 12                                                            | --- | --- | yes | yes |
| 8020508 | RIOK3   | ENSG00000101782 | RIO kinase 3                                                                        | --- | --- | yes | yes |
| 8174448 | GUCY2F  | ENSG00000101890 | guanylate cyclase 2F, retinal                                                       | --- | --- | yes | yes |
| 7988687 | GABPB1  | ENSG00000104064 | GA binding protein transcription factor, beta subunit 1                             | --- | --- | yes | yes |
| 8151561 | ZFAND1  | ENSG00000104231 | zinc finger, AN1-type domain 1                                                      | --- | --- | yes | yes |
| 8147351 | ESRP1   | ENSG00000104413 | epithelial splicing regulatory protein 1                                            | --- | --- | yes | yes |
| 8038309 | KCNA7   | ENSG00000104848 | potassium voltage-gated channel, shaker-related subfamily, member 7                 | --- | --- | yes | yes |
| 8026398 | CASP14  | ENSG00000105141 | caspase 14, apoptosis-related cysteine peptidase                                    | --- | --- | yes | yes |
| 7933084 | NAMPT   | ENSG00000105835 | nicotinamide phosphoribosyltransferase                                              | --- | --- | yes | yes |
| 8135601 | MET     | ENSG00000105976 | met proto-oncogene                                                                  | --- | --- | yes | yes |
| 8131475 | C1GALT1 | ENSG00000106392 | core 1 synthase, glycoprotein-N-acetylgalactosamine 3-beta-galactosyltransferase, 1 | --- | --- | yes | yes |
| 8016832 | MMD     | ENSG00000108960 | monocyte to macrophage differentiation-associated                                   | --- | --- | yes | yes |
| 7950983 | CHORDC1 | ENSG00000110172 | cysteine and histidine-rich domain (CHORD) containing 1                             | --- | --- | yes | yes |
| 7958425 | DAO     | ENSG00000110887 | D-amino-acid oxidase                                                                | --- | --- | yes | yes |
| 8121734 | ASF1A   | ENSG00000111875 | anti-silencing function 1A histone chaperone                                        | --- | --- | yes | yes |

|         |           |                 |                                                                      |     |     |     |     |
|---------|-----------|-----------------|----------------------------------------------------------------------|-----|-----|-----|-----|
| 8120431 | PTP4A1    | ENSG00000112245 | protein tyrosine phosphatase type IVA, member 1                      | --- | --- | yes | yes |
| 8120758 | SENP6     | ENSG00000112701 | SUMO1/sentrin specific peptidase 6                                   | --- | --- | yes | yes |
| 8111941 | HMGCS1    | ENSG00000112972 | 3-hydroxy-3-methylglutaryl-CoA synthase 1 (soluble)                  | --- | --- | yes | yes |
| 8083063 | SLC25A36  | ENSG00000114120 | solute carrier family 25 (pyrimidine nucleotide carrier ), member 36 | --- | --- | yes | yes |
| 8088958 | GBE1      | ENSG00000114480 | glucan (1,4-alpha-), branching enzyme 1                              | --- | --- | yes | yes |
| 8078962 | EIF1B     | ENSG00000114784 | eukaryotic translation initiation factor 1B                          | --- | --- | yes | yes |
| 8048864 | CCL20     | ENSG00000115009 | chemokine (C-C motif) ligand 20                                      | --- | --- | yes | yes |
| 8056977 | NFE2L2    | ENSG00000116044 | nuclear factor (erythroid-derived 2)-like 2                          | --- | --- | yes | yes |
| 7914603 | RNF19B    | ENSG00000116514 | ring finger protein 19B                                              | --- | --- | yes | yes |
| 7915160 | RRAGC     | ENSG00000116954 | Ras-related GTP binding C                                            | --- | --- | yes | yes |
| 7910950 | KMO       | ENSG00000117009 | kynurenine 3-monooxygenase (kynurenine 3-hydroxylase)                | --- | --- | yes | yes |
| 8122265 | TNFAIP3   | ENSG00000118503 | tumor necrosis factor, alpha-induced protein 3                       | --- | --- | yes | yes |
| 8041273 | YIPF4     | ENSG00000119820 | Yip1 domain family, member 4                                         | --- | --- | yes | yes |
| 8042291 | AFTPH     | ENSG00000119844 | aftiphilin                                                           | --- | --- | yes | yes |
| 8017711 | GNA13     | ENSG00000120063 | guanine nucleotide binding protein (G protein), alpha 13             | --- | --- | yes | yes |
| 8149733 | TNFRSF10B | ENSG00000120889 | tumor necrosis factor receptor superfamily, member 10b               | --- | --- | yes | yes |
| 8146921 | RDH10     | ENSG00000121039 | retinol dehydrogenase 10 (all-trans)                                 | --- | --- | yes | yes |
| 7954382 | PYROXD1   | ENSG00000121350 | pyridine nucleotide-disulphide oxidoreductase domain 1               | --- | --- | yes | yes |
| 7957186 | TBC1D15   | ENSG00000121749 | TBC1 domain family, member 15                                        | --- | --- | yes | yes |
| 8079392 | CCR2      | ENSG00000121807 | chemokine (C-C motif) receptor 2                                     | --- | --- | yes | yes |
| 8099850 | TMEM156   | ENSG00000121895 | transmembrane protein 156                                            | --- | --- | yes | yes |
| 7918467 | LRIF1     | ENSG00000121931 | ligand dependent nuclear receptor interacting factor 1               | --- | --- | yes | yes |
| 8174979 | ACTRT1    | ENSG00000123165 | actin-related protein T1                                             | --- | --- | yes | yes |
| 8064868 | GPCPD1    | ENSG00000125772 | glycerophosphocholine phosphodiesterase GDE1 homolog (S. cerevisiae) | --- | --- | yes | yes |
| 8136645 | TAS2R4    | ENSG00000127364 | taste receptor, type 2, member 4                                     | --- | --- | yes | yes |
| 8140840 | STEAP4    | ENSG00000127954 | STEAP family member 4                                                | --- | --- | yes | yes |
| 8095139 | SRD5A3    | ENSG00000128039 | steroid 5 alpha-reductase 3                                          | --- | --- | yes | yes |
| 8062461 | LBP       | ENSG00000129988 | lipopolysaccharide binding protein                                   | --- | --- | yes | yes |
| 7919305 | PRKAB2    | ENSG00000131791 | protein kinase, AMP-activated, beta 2 non-catalytic subunit          | --- | --- | yes | yes |
| 7991598 | SNRPA1    | ENSG00000131876 | small nuclear ribonucleoprotein polypeptide A'                       | --- | --- | yes | yes |
| 8066402 | OSER1     | ENSG00000132823 | oxidative stress responsive serine-rich 1                            | --- | --- | yes | yes |
| 7970428 | ZMYM5     | ENSG00000132950 | zinc finger, MYM-type 5                                              | --- | --- | yes | yes |
| 7968199 | CDK8      | ENSG00000132964 | cyclin-dependent kinase 8                                            | --- | --- | yes | yes |
| 8174239 | BEX2      | ENSG00000133134 | brain expressed X-linked 2                                           | --- | --- | yes | yes |
| 7965423 | BTG1      | ENSG00000133639 | B-cell translocation gene 1, anti-proliferative                      | --- | --- | yes | yes |
| 8022356 | SPIRE1    | ENSG00000134278 | spire homolog 1 (Drosophila)                                         | --- | --- | yes | yes |
| 8112139 | IL6ST     | ENSG00000134352 | interleukin 6 signal transducer (gp130, oncostatin M receptor)       | --- | --- | yes | yes |
| 8161857 | RFK       | ENSG00000135002 | riboflavin kinase                                                    | --- | --- | yes | yes |
| 7939314 | EHF       | ENSG00000135373 | ets homologous factor                                                | --- | --- | yes | yes |
| 7958414 | ISCU      | ENSG00000136003 | iron-sulfur cluster scaffold homolog (E. coli)                       | --- | --- | yes | yes |
| 7968931 | COG3      | ENSG00000136152 | component of oligomeric golgi complex 3                              | --- | --- | yes | yes |
| 8131803 | IL6       | ENSG00000136244 | interleukin 6 (interferon, beta 2)                                   | --- | --- | yes | yes |
| 7988767 | CYP19A1   | ENSG00000137869 | cytochrome P450, family 19, subfamily A, polypeptide 1               | --- | --- | yes | yes |
| 7989013 | RSL24D1   | ENSG00000137876 | ribosomal L24 domain containing 1                                    | --- | --- | yes | yes |
| 7917754 | BCAR3     | ENSG00000137936 | breast cancer anti-estrogen resistance 3                             | --- | --- | yes | yes |
| 8051583 | CYP1B1    | ENSG00000138061 | cytochrome P450, family 1, subfamily B, polypeptide 1                | --- | --- | yes | yes |

|         |            |                 |                                                                              |     |     |     |     |
|---------|------------|-----------------|------------------------------------------------------------------------------|-----|-----|-----|-----|
| 7929012 | STAMBPL1   | ENSG00000138134 | STAM binding protein-like 1                                                  | --- | --- | yes | yes |
| 7936809 | CUZD1      | ENSG00000138161 | CUB and zona pellucida-like domains 1                                        | --- | --- | yes | yes |
| 8096004 | BMP2K      | ENSG00000138756 | BMP2 inducible kinase                                                        | --- | --- | yes | yes |
| 8102162 | INTS12     | ENSG00000138785 | integrator complex subunit 12                                                | --- | --- | yes | yes |
| 7955117 | ANP32D     | ENSG00000139223 | acidic (leucine-rich) nuclear phosphoprotein 32 family, member D             | --- | --- | yes | yes |
| 7968132 | NUPL1      | ENSG00000139496 | nucleoporin like 1                                                           | --- | --- | yes | yes |
| 7975406 | ADAM21     | ENSG00000139985 | ADAM metallopeptidase domain 21                                              | --- | --- | yes | yes |
| 7989315 | GTF2A2     | ENSG00000140307 | general transcription factor IIA, 2, 12kDa                                   | --- | --- | yes | yes |
| 8022803 | GAREM      | ENSG00000141441 | GRB2 associated, regulator of MAPK1                                          | --- | --- | yes | yes |
| 8022473 | ESCO1      | ENSG00000141446 | establishment of sister chromatid cohesion N-acetyltransferase 1             | --- | --- | yes | yes |
| 8022531 | NPC1       | ENSG00000141458 | Niemann-Pick disease, type C1                                                | --- | --- | yes | yes |
| 7921786 | PFDN2      | ENSG00000143256 | prefoldin subunit 2                                                          | --- | --- | yes | yes |
| 8051605 | HNRNPLL    | ENSG00000143889 | heterogeneous nuclear ribonucleoprotein L-like                               | --- | --- | yes | yes |
| 8078214 | RAB5A      | ENSG00000144566 | RAB5A, member RAS oncogene family                                            | --- | --- | yes | yes |
| 8105040 | OSMR       | ENSG00000145623 | oncostatin M receptor                                                        | --- | --- | yes | yes |
| 8106504 | BHMT       | ENSG00000145692 | betaine--homocysteine S-methyltransferase                                    | --- | --- | yes | yes |
| 8166956 | KDM6A      | ENSG00000147050 | lysine (K)-specific demethylase 6A                                           | --- | --- | yes | yes |
| 8149574 | CSGALNACT1 | ENSG00000147408 | chondroitin sulfate N-acetylgalactosaminyltransferase 1                      | --- | --- | yes | yes |
| 8160297 | PLIN2      | ENSG00000147872 | perilipin 2                                                                  | --- | --- | yes | yes |
| 8163896 | STOM       | ENSG00000148175 | stomatin                                                                     | --- | --- | yes | yes |
| 8063019 | SPINT4     | ENSG00000149651 | serine peptidase inhibitor, Kunitz type 4                                    | --- | --- | yes | yes |
| 8050190 | ADAM17     | ENSG00000151694 | ADAM metallopeptidase domain 17                                              | --- | --- | yes | yes |
| 7962185 | AMN1       | ENSG00000151743 | antagonist of mitotic exit network 1 homolog (S. cerevisiae)                 | --- | --- | yes | yes |
| 8046408 | PDK1       | ENSG00000152256 | pyruvate dehydrogenase kinase, isozyme 1                                     | --- | --- | yes | yes |
| 8106516 | JMY        | ENSG00000152409 | junction mediating and regulatory protein, p53 cofactor                      | --- | --- | yes | yes |
| 8041644 | PLEKHH2    | ENSG00000152527 | pleckstrin homology domain containing, family H (with MyTH4 domain) member 2 | --- | --- | yes | yes |
| 8041422 | RASGRP3    | ENSG00000152689 | RAS guanyl releasing protein 3 (calcium and DAG-regulated)                   | --- | --- | yes | yes |
| 8102877 | CLGN       | ENSG00000153132 | calmegin                                                                     | --- | --- | yes | yes |
| 8056206 | RBMS1      | ENSG00000153250 | RNA binding motif, single stranded interacting protein 1                     | --- | --- | yes | yes |
| 8154381 | LURAP1L    | ENSG00000153714 | leucine rich adaptor protein 1-like                                          | --- | --- | yes | yes |
| 8027566 | CEBPG      | ENSG00000153879 | CCAAT/enhancer binding protein (C/EBP), gamma                                | --- | --- | yes | yes |
| 8152222 | AZIN1      | ENSG00000155096 | antizyme inhibitor 1                                                         | --- | --- | yes | yes |
| 7918474 | DRAM2      | ENSG00000156171 | DNA-damage regulated autophagy modulator 2                                   | --- | --- | yes | yes |
| 8022488 | ABHD3      | ENSG00000158201 | abhydrolase domain containing 3                                              | --- | --- | yes | yes |
| 8054192 | MITD1      | ENSG00000158411 | MIT, microtubule interacting and transport, domain containing 1              | --- | --- | yes | yes |
| 8066939 | B4GALT5    | ENSG00000158470 | UDP-Gal:betaGlcNAc beta 1,4- galactosyltransferase, polypeptide 5            | --- | --- | yes | yes |
| 7905154 | C1orf51    | ENSG00000159208 | chromosome 1 open reading frame 51                                           | --- | --- | yes | yes |
| 8086689 | MYL3       | ENSG00000160808 | myosin, light chain 3, alkali; ventricular, skeletal, slow                   | --- | --- | yes | yes |
| 7901720 | PRKAA2     | ENSG00000162409 | protein kinase, AMP-activated, alpha 2 catalytic subunit                     | --- | --- | yes | yes |
| 7917331 | C1orf52    | ENSG00000162642 | chromosome 1 open reading frame 52                                           | --- | --- | yes | yes |
| 8058108 | TYW5       | ENSG00000162971 | tRNA-yW synthesizing protein 5                                               | --- | --- | yes | yes |
| 8047854 | CCNYL1     | ENSG00000163249 | cyclin Y-like 1                                                              | --- | --- | yes | yes |
| 8089584 | C3orf17    | ENSG00000163608 | chromosome 3 open reading frame 17                                           | --- | --- | yes | yes |
| 8080419 | GNL3       | ENSG00000163938 | guanine nucleotide binding protein-like 3 (nucleolar)                        | --- | --- | yes | yes |
| 8111698 | RICTOR     | ENSG00000164327 | RPTOR independent companion of MTOR, complex 2                               | --- | --- | yes | yes |
| 8106534 | PAPD4      | ENSG00000164329 | PAP associated domain containing 4                                           | --- | --- | yes | yes |

|         |           |                 |                                                                                  |     |     |     |     |
|---------|-----------|-----------------|----------------------------------------------------------------------------------|-----|-----|-----|-----|
| 8112596 | ANKRA2    | ENSG00000164331 | ankyrin repeat, family A (RFXANK-like), 2                                        | --- | --- | yes | yes |
| 8109597 | UBLCP1    | ENSG00000164332 | ubiquitin-like domain containing CTD phosphatase 1                               | --- | --- | yes | yes |
| 8171418 | PIGA      | ENSG00000165195 | phosphatidylinositol glycan anchor biosynthesis, class A                         | --- | --- | yes | yes |
| 7951008 | TAF1D     | ENSG00000166012 | TATA box binding protein (TBP)-associated factor, RNA polymerase I, D, 41kDa     | --- | --- | yes | yes |
| 7984641 | ARIH1     | ENSG00000166233 | ariadne homolog, ubiquitin-conjugating enzyme E2 binding protein, 1 (Drosophila) | --- | --- | yes | yes |
| 8021453 | SEC11C    | ENSG00000166562 | SEC11 homolog C (S. cerevisiae)                                                  | --- | --- | yes | yes |
| 8161164 | OR13J1    | ENSG00000168828 | olfactory receptor, family 13, subfamily J, member 1                             | --- | --- | yes | yes |
| 8101126 | CXCL10    | ENSG00000169245 | chemokine (C-X-C motif) ligand 10                                                | --- | --- | yes | yes |
| 8113873 | HINT1     | ENSG00000169567 | histidine triad nucleotide binding protein 1                                     | --- | --- | yes | yes |
| 8078262 | UBE2E1    | ENSG00000170142 | ubiquitin-conjugating enzyme E2E 1                                               | --- | --- | yes | yes |
| 8078397 | CMTM8     | ENSG00000170293 | CKLF-like MARVEL transmembrane domain containing 8                               | --- | --- | yes | yes |
| 8041902 | FOXN2     | ENSG00000170802 | forkhead box N2                                                                  | --- | --- | yes | yes |
| 7968928 | TPT1-AS1  | ENSG00000170919 | TPT1 antisense RNA 1                                                             | --- | --- | yes | yes |
| 7942889 | TMEM126A  | ENSG00000171202 | transmembrane protein 126A                                                       | --- | --- | yes | yes |
| 8166919 | GPR82     | ENSG00000171657 | G protein-coupled receptor 82                                                    | --- | --- | yes | yes |
| 7933877 | JMJD1C    | ENSG00000171988 | jumonji domain containing 1C                                                     | --- | --- | yes | yes |
| 8040211 | KLF11     | ENSG00000172059 | Kruppel-like factor 11                                                           | --- | --- | yes | yes |
| 7927513 | FAM21C    | ENSG00000172661 | family with sequence similarity 21, member C                                     | --- | --- | yes | yes |
| 8092230 | ZMAT3     | ENSG00000172667 | zinc finger, matrin-type 3                                                       | --- | --- | yes | yes |
| 8070557 | ZBTB21    | ENSG00000173276 | zinc finger and BTB domain containing 21                                         | --- | --- | yes | yes |
| 8078272 | NR1D2     | ENSG00000174738 | nuclear receptor subfamily 1, group D, member 2                                  | --- | --- | yes | yes |
| 8169603 | LONRF3    | ENSG00000175556 | LON peptidase N-terminal domain and ring finger 3                                | --- | --- | yes | yes |
| 8136979 | CTAGE15   | ENSG00000176227 | CTAGE family, member 15                                                          | --- | --- | yes | yes |
| 8129560 | CTAGE15   | ENSG00000176227 | CTAGE family, member 15                                                          | --- | --- | yes | yes |
| 7914550 | ZBTB8OS   | ENSG00000176261 | zinc finger and BTB domain containing 8 opposite strand                          | --- | --- | yes | yes |
| 8043105 | KCMF1     | ENSG00000176407 | potassium channel modulatory factor 1                                            | --- | --- | yes | yes |
| 8171762 | RPS6KA3   | ENSG00000177189 | ribosomal protein S6 kinase, 90kDa, polypeptide 3                                | --- | --- | yes | yes |
| 7971563 | PCNPP5    | ENSG00000177197 | PEST containing nuclear protein pseudogene 5                                     | --- | --- | yes | yes |
| 7929562 | ZNF518A   | ENSG00000177853 | zinc finger protein 518A                                                         | --- | --- | yes | yes |
| 8137709 | ZFAND2A   | ENSG00000178381 | zinc finger, AN1-type domain 2A                                                  | --- | --- | yes | yes |
| 7968883 | LACC1     | ENSG00000179630 | laccase (multicopper oxidoreductase) domain containing 1                         | --- | --- | yes | yes |
| 7993999 | 0         | ENSG00000180747 |                                                                                  | 0   | --- | yes | yes |
| 7946025 | OR52A1    | ENSG00000182070 | olfactory receptor, family 52, subfamily A, member 1                             | --- | --- | yes | yes |
| 8078252 | UBE2E2    | ENSG00000182247 | ubiquitin-conjugating enzyme E2E 2                                               | --- | --- | yes | yes |
| 7978739 | TRAPPC6B  | ENSG00000182400 | trafficking protein particle complex 6B                                          | --- | --- | yes | yes |
| 8010624 | TSPAN10   | ENSG00000182612 | tetraspanin 10                                                                   | --- | --- | yes | yes |
| 8000167 | 0         | ENSG00000183604 |                                                                                  | 0   | --- | yes | yes |
| 8132725 | UPP1      | ENSG00000183696 | uridine phosphorylase 1                                                          | --- | --- | yes | yes |
| 8129120 | FAM162B   | ENSG00000183807 | family with sequence similarity 162, member B                                    | --- | --- | yes | yes |
| 7972239 | SLITRK6   | ENSG00000184564 | SLIT and NTRK-like family, member 6                                              | --- | --- | yes | yes |
| 7956785 | XPOT      | ENSG00000184575 | exportin, tRNA                                                                   | --- | --- | yes | yes |
| 8006336 | LRRC37B   | ENSG00000185158 | leucine rich repeat containing 37B                                               | --- | --- | yes | yes |
| 7974146 | PRPF39    | ENSG00000185246 | PRP39 pre-mRNA processing factor 39 homolog (S. cerevisiae)                      | --- | --- | yes | yes |
| 7983704 | GLDN      | ENSG00000186417 | gliomedin                                                                        | --- | --- | yes | yes |
| 8091764 | KPNA4     | ENSG00000186432 | karyopherin alpha 4 (importin alpha 3)                                           | --- | --- | yes | yes |
| 8069838 | KRTAP19-5 | ENSG00000186977 | keratin associated protein 19-5                                                  | --- | --- | yes | yes |

|         |               |                 |                                                                      |     |     |     |     |
|---------|---------------|-----------------|----------------------------------------------------------------------|-----|-----|-----|-----|
| 8044450 | ZC3H6         | ENSG00000188177 | zinc finger CCCH-type containing 6                                   | --- | --- | yes | yes |
| 8000028 | DCUN1D3       | ENSG00000188215 | DCN1, defective in cullin neddylation 1, domain containing 3         | --- | --- | yes | yes |
| 7962194 | H3F3C         | ENSG00000188375 | H3 histone, family 3C                                                | --- | --- | yes | yes |
| 8017259 | 0             | ENSG00000196861 |                                                                      | 0   | --- | yes | yes |
| 7951372 | CASP4         | ENSG00000196954 | caspase 4, apoptosis-related cysteine peptidase                      | --- | --- | yes | yes |
| 7937079 | BNIP3P1       | ENSG00000197358 | BCL2/adenovirus E1B 19kDa interacting protein 3 pseudogene 1         | --- | --- | yes | yes |
| 8102988 | GYPE          | ENSG00000197465 | glycophorin E (MNS blood group)                                      | --- | --- | yes | yes |
| 8112409 | SGTB          | ENSG00000197860 | small glutamine-rich tetratricopeptide repeat (TPR)-containing, beta | --- | --- | yes | yes |
| 7914202 | SNHG12        | ENSG00000197989 | small nucleolar RNA host gene 12 (non-protein coding)                | --- | --- | yes | yes |
| 7909011 | MDM4          | ENSG00000198625 | Mdm4 p53 binding protein homolog (mouse)                             | --- | --- | yes | yes |
| 8174972 | DCAF12L1      | ENSG00000198889 | DDB1 and CUL4 associated factor 12-like 1                            | --- | --- | yes | yes |
| 8163341 | LRRRC37A5P    | ENSG00000204173 | leucine rich repeat containing 37, member A5, pseudogene             | --- | --- | yes | yes |
| 8000651 | 0             | ENSG00000205534 |                                                                      | 0   | --- | yes | yes |
| 8000834 | 0             | ENSG00000205534 |                                                                      | 0   | --- | yes | yes |
| 8105104 | C5orf51       | ENSG00000205765 | chromosome 5 open reading frame 51                                   | --- | --- | yes | yes |
| 8149350 | DEFB134       | ENSG00000205882 | defensin, beta 134                                                   | --- | --- | yes | yes |
| 8105862 | 0             | ENSG00000213194 |                                                                      | 0   | --- | yes | yes |
| 8177462 | 0             | ENSG00000213194 |                                                                      | 0   | --- | yes | yes |
| 8017704 | AMZ2P1        | ENSG00000214174 | archaelysin family metallopeptidase 2 pseudogene 1                   | --- | --- | yes | yes |
| 8023252 | RPL17-C18orf1 | ENSG00000215472 | RPL17-C18orf32 readthrough                                           | --- | --- | yes | yes |
| 7968226 | RPL21P28      | ENSG00000220749 | ribosomal protein L21 pseudogene 28                                  | --- | --- | yes | yes |
| 8049961 | 0             | ENSG00000220804 |                                                                      | 0   | --- | yes | yes |
| 8145440 | PPP2R2A       | ENSG00000221914 | protein phosphatase 2, regulatory subunit B, alpha                   | --- | --- | yes | yes |
| 8039075 | VN1R4         | ENSG00000228567 | vomeroneasal 1 receptor 4                                            | --- | --- | yes | yes |
| 8126952 | 0             | ENSG00000232702 |                                                                      | 0   | --- | yes | yes |
| 7979904 | ADAM21P1      | ENSG00000235812 | ADAM metallopeptidase domain 21 pseudogene 1                         | --- | --- | yes | yes |
| 7952126 | RPL23AP64     | ENSG00000240970 | ribosomal protein L23a pseudogene 64                                 | --- | --- | yes | yes |
| 7994006 | 0             | ENSG00000254634 |                                                                      | 0   | --- | yes | yes |
| 8000156 | 0             | ENSG00000254634 |                                                                      | 0   | --- | yes | yes |
| 7975645 | 0             | ENSG00000258653 | Uncharacterized protein                                              | --- | --- | yes | yes |
| 8009255 | CEP95         | ENSG00000258890 | centrosomal protein 95kDa                                            | --- | --- | yes | yes |
| 7989885 | 0             | ENSG00000259924 |                                                                      | 0   | --- | yes | yes |
| 7995258 | 0             | ENSG00000262657 |                                                                      | 0   | --- | yes | yes |
| 8004510 | SNORA67       | ENSG00000264772 | small nucleolar RNA, H/ACA box 67                                    | --- | --- | yes | yes |
| 7926609 | COMMD3-BMI1   | ENSG00000269897 | COMMD3-BMI1 readthrough                                              | --- | --- | yes | yes |
| 8168387 | FAM226A       | ENSG00000269911 | family with sequence similarity 226, member A (non-protein coding)   | --- | --- | yes | yes |
| 8101501 |               |                 |                                                                      | --- | --- | yes | yes |

More in CSC than Nonstimulated and NCSC



**Table S2. GSEA report for stimulated (ST) vs non-stimulated (NS)**

| NAME                                                      | SIZE | ES         | NES       | NOM p-val | FDR q-val | FWER p-val |
|-----------------------------------------------------------|------|------------|-----------|-----------|-----------|------------|
| MISSIAGLIA_REGULATED_BY_METHYLATION_UP                    | 106  | 0.7575327  | 3.2196376 | 0         | 0         | 0          |
| DUTERTRE ESTRADIOL_RESPONSE_24HR_DN                       | 470  | 0.58940184 | 2.9775474 | 0         | 0         | 0          |
| MOSERLE_IFNA_RESPONSE                                     | 30   | 0.89596575 | 2.9335487 | 0         | 0         | 0          |
| HECKER_IFNB1_TARGETS                                      | 87   | 0.7185145  | 2.9276676 | 0         | 0         | 0          |
| PEDERSEN_METASTASIS_BY_ERBB2_ISOFORM_1                    | 42   | 0.82571083 | 2.9120982 | 0         | 0         | 0          |
| ZHANG_RESPONSE_TO_IKK_INHIBITOR_AND_TNF_UP                | 200  | 0.61385417 | 2.8384557 | 0         | 0         | 0          |
| LIANG_SILENCED_BY_METHYLATION_2                           | 50   | 0.7730708  | 2.825356  | 0         | 0         | 0          |
| STAMBOLSKY_TARGETS_OF_MUTATED_TP53_DN                     | 43   | 0.792124   | 2.8105314 | 0         | 0         | 0          |
| DAUER_STAT3_TARGETS_DN                                    | 46   | 0.75971293 | 2.7886515 | 0         | 0         | 0          |
| DER_IFN_ALPHA_RESPONSE_UP                                 | 69   | 0.70287746 | 2.7558482 | 0         | 0         | 0          |
| BROWNE_INTERFERON_RESPONSIVE_GENES                        | 63   | 0.7138035  | 2.7402694 | 0         | 0         | 0          |
| TAKEDA_TARGETS_OF_NUP98_HOXA9_FUSION_3D_UP                | 157  | 0.6060114  | 2.7139838 | 0         | 0         | 0          |
| SANA_TNF_SIGNALING_UP                                     | 78   | 0.6696812  | 2.7132013 | 0         | 0         | 0          |
| JOHNSTONE_PARVB_TARGETS_3_UP                              | 386  | 0.5515398  | 2.7037892 | 0         | 0         | 0          |
| DER_IFN_BETA_RESPONSE_UP                                  | 96   | 0.64201415 | 2.6793425 | 0         | 0         | 0          |
| ELVIDGE_HYPOXIA_BY_DMOG_UP                                | 116  | 0.61944276 | 2.671809  | 0         | 0         | 0          |
| BENNETT_SYSTEMIC_LUPUS_ERYTHEMATOSUS                      | 28   | 0.82565093 | 2.6568213 | 0         | 0         | 0          |
| PEDERSEN_TARGETS_OF_611CTF_ISOFORM_OF_ERBB2               | 71   | 0.68479246 | 2.6521013 | 0         | 0         | 0          |
| ZHANG_INTERFERON_RESPONSE                                 | 23   | 0.843808   | 2.6491656 | 0         | 0         | 0          |
| EINAV_INTERFERON_SIGNATURE_IN_CANCER                      | 26   | 0.841185   | 2.6461213 | 0         | 0         | 0          |
| SEITZ NEOPLASTIC_TRANSFORMATION_BY_8P_DELETION_UP         | 68   | 0.66818714 | 2.6313422 | 0         | 0         | 0          |
| GAJATE_RESPONSE_TO TRABECTEDIN_UP                         | 61   | 0.66629833 | 2.6239002 | 0         | 0         | 0          |
| KINSEY_TARGETS_OF_EWSR1_FLII_FUSION_DN                    | 289  | 0.53816754 | 2.6119616 | 0         | 0         | 0          |
| HENDRICKS_SMARCA4_TARGETS_UP                              | 54   | 0.7149049  | 2.6046743 | 0         | 0         | 0          |
| PODAR_RESPONSE_TO_ADAPHOSTIN_UP                           | 132  | 0.6016681  | 2.5921633 | 0         | 0         | 0          |
| SARRIO_EPITHELIAL_MESENCHYMAL_TRANSITION_DN               | 137  | 0.5846353  | 2.5842204 | 0         | 0         | 0          |
| ONDER_CDH1_TARGETS_2_DN                                   | 433  | 0.5084539  | 2.5557318 | 0         | 0         | 0          |
| KIM_LRRC3B_TARGETS                                        | 28   | 0.783433   | 2.5460315 | 0         | 0         | 0          |
| TAKEDA_TARGETS_OF_NUP98_HOXA9_FUSION_8D_UP                | 137  | 0.5840697  | 2.545877  | 0         | 0         | 0          |
| BOWIE_RESPONSE_TO_TAMOXIFEN                               | 18   | 0.8731276  | 2.5363333 | 0         | 0         | 0          |
| FARMER_BREAST_CANCER_CLUSTER_1                            | 38   | 0.7317757  | 2.53344   | 0         | 0         | 0          |
| DER_IFN_GAMMA_RESPONSE_UP                                 | 66   | 0.6423198  | 2.5312881 | 0         | 0         | 0          |
| BECKER_TAMOXIFEN_RESISTANCE_UP                            | 47   | 0.6951153  | 2.524051  | 0         | 0         | 0          |
| DELYS_THYROID_CANCER_UP                                   | 410  | 0.49447244 | 2.5035548 | 0         | 0         | 0          |
| NAGASHIMA_NRG1_SIGNALING_UP                               | 164  | 0.5568401  | 2.499764  | 0         | 0         | 0          |
| FURUKAWA_DUSP6_TARGETS_PCI35_UP                           | 62   | 0.64329255 | 2.496092  | 0         | 0         | 0          |
| TSAI_RESPONSE_TO_RADIATION_THERAPY                        | 31   | 0.74149334 | 2.4901378 | 0         | 0         | 0          |
| GALINDO_IMMUNE_RESPONSE_TO_ENTEROTOXIN                    | 78   | 0.62155706 | 2.484655  | 0         | 0         | 0          |
| AMIT_EGF_RESPONSE_480_HELA                                | 147  | 0.5659984  | 2.4805572 | 0         | 0         | 0          |
| SANA_RESPONSE_TO_IFNG_UP                                  | 63   | 0.6452311  | 2.465172  | 0         | 0         | 0          |
| BOSCO_INTERFERON_INDUCED_ANTIVIRAL_MODULE                 | 68   | 0.6263192  | 2.4637656 | 0         | 0         | 0          |
| HUPER_BREAST_BASAL_VS_LUMINAL_DN                          | 56   | 0.64836055 | 2.4567425 | 0         | 0         | 0          |
| TONKS_TARGETS_OF_RUNX1_RUNX1T1_FUSION_ERYTHROCYTE_UP      | 145  | 0.5570548  | 2.4496841 | 0         | 0         | 0          |
| APPEL_IMATINIB_RESPONSE                                   | 31   | 0.7438213  | 2.4490073 | 0         | 0         | 0          |
| ELVIDGE_HYPOXIA_UP                                        | 151  | 0.54986197 | 2.4489572 | 0         | 0         | 0          |
| NIKOLSKY_BREAST_CANCER_16P13_AMPLICON                     | 88   | 0.5942371  | 2.4454079 | 0         | 0         | 0          |
| LIN_SILENCED_BY_TUMOR_MICROENVIRONMENT                    | 101  | 0.57912105 | 2.4435372 | 0         | 0         | 0          |
| JOHNSTONE_PARVB_TARGETS_2_UP                              | 128  | 0.56143826 | 2.438389  | 0         | 0         | 0          |
| KRASNOSELSKAYA_ILF3_TARGETS_UP                            | 35   | 0.7220519  | 2.4381742 | 0         | 0         | 0          |
| RODRIGUES_THYROID_CARCINOMA_DN                            | 66   | 0.6236411  | 2.4301884 | 0         | 0         | 0          |
| TAKEDA_TARGETS_OF_NUP98_HOXA9_FUSION_10D_UP               | 172  | 0.5318044  | 2.4030454 | 0         | 0         | 0          |
| MAHADEVAN_RESPONSE_TO_MP470_DN                            | 18   | 0.8221337  | 2.368514  | 0         | 0         | 0          |
| RADAEVA_RESPONSE_TO_IFNA1_UP                              | 49   | 0.64401054 | 2.365806  | 0         | 0         | 0          |
| MASRI_RESISTANCE_TO_TAMOXIFEN_AND_AROMATASE_INHIBITORS_DN | 18   | 0.8227468  | 2.3599927 | 0         | 0         | 0          |
| BOWIE_RESPONSE_TO_EXTRACELLULAR_MATRIX                    | 16   | 0.8680786  | 2.3594434 | 0         | 0         | 0          |
| MARKEY_RB1_ACUTE_LOF_UP                                   | 191  | 0.50214    | 2.3285055 | 0         | 2.69E-05  | 0.001      |
| RICKMAN_METASTASIS_DN                                     | 220  | 0.4998286  | 2.3356307 | 0         | 2.74E-05  | 0.001      |
| RASHI_RESPONSE_TO_IONIZING_RADIATION_2                    | 111  | 0.5445986  | 2.340206  | 0         | 2.78E-05  | 0.001      |
| ALTEMEIER_RESPONSE_TO_LPS_WITH_MECHANICAL_VENTILATION     | 114  | 0.54775256 | 2.3411148 | 0         | 2.83E-05  | 0.001      |
| ZWANG_CLASS_3_TRANSIENTLY_INDUCED_BY_EGF                  | 196  | 0.5134745  | 2.3432279 | 0         | 2.88E-05  | 0.001      |
| CHANG_CORE_SERUM_RESPONSE_DN                              | 175  | 0.51950866 | 2.3485572 | 0         | 2.93E-05  | 0.001      |
| ICHIBA_GRAFT_VERSUS_HOST_DISEASE_D7_UP                    | 89   | 0.57400745 | 2.3494427 | 0         | 2.98E-05  | 0.001      |
| KRIGE_AMINO_ACID_DEPRIVATION                              | 29   | 0.71669376 | 2.317877  | 0         | 8.15E-05  | 0.003      |
| AMIT_SERUM_RESPONSE_240_MCF10A                            | 53   | 0.61518806 | 2.2889814 | 0         | 9.88E-05  | 0.004      |
| MURATA_VIRULENCE_OF_H_PILORI                              | 24   | 0.757331   | 2.290532  | 0         | 1.00E-04  | 0.004      |
| ODONNELL_TARGETS_OF_MYC_AND_TFRC_UP                       | 73   | 0.57581383 | 2.293401  | 0         | 1.02E-04  | 0.004      |
| REN_ALVEOLAR_RHABDOMYOSARCOMA_DN                          | 379  | 0.4581439  | 2.2970507 | 0         | 1.03E-04  | 0.004      |
| LINDSTEDT_DENDRITIC_CELL_MATURATION_A                     | 61   | 0.59402543 | 2.3009984 | 0         | 1.05E-04  | 0.004      |
| WINZEN_DEGRADED_VIA_KHSRP                                 | 92   | 0.54170454 | 2.2567239 | 0         | 1.06E-04  | 0.005      |
| HAHTOLA_MYCOSIS_FUNGOIDES_CD4_UP                          | 60   | 0.613198   | 2.3013783 | 0         | 1.06E-04  | 0.004      |
| CERVERA_SDHB_TARGETS_1_UP                                 | 98   | 0.55222034 | 2.2626235 | 0         | 1.07E-04  | 0.005      |
| PASINI_SUZ12_TARGETS_DN                                   | 297  | 0.4755338  | 2.305953  | 0         | 1.08E-04  | 0.004      |
| GROSS_HYPOXIA_VIA_ELK3_ONLY_UP                            | 32   | 0.67870146 | 2.2668731 | 0         | 1.09E-04  | 0.005      |
| AMIT_EGF_RESPONSE_120_HELA                                | 60   | 0.5898571  | 2.267323  | 0         | 1.10E-04  | 0.005      |
| PETROVA_ENDOTHELIUM_LYMPHATIC_VS_BLOOD_DN                 | 156  | 0.51507545 | 2.269474  | 0         | 1.11E-04  | 0.005      |
| PHONG_TNF_TARGETS_UP                                      | 60   | 0.596065   | 2.269863  | 0         | 1.13E-04  | 0.005      |
| NADLER_OBESITY_UP                                         | 58   | 0.59530526 | 2.2303247 | 0         | 1.13E-04  | 0.006      |

|                                                                   |     |            |           |   |          |       |
|-------------------------------------------------------------------|-----|------------|-----------|---|----------|-------|
| SEKI_INFLAMMATORY_RESPONSE_LPS_UP                                 | 70  | 0.56195676 | 2.2314155 | 0 | 1.14E-04 | 0.006 |
| XU_AKT1_TARGETS_6HR                                               | 26  | 0.7194544  | 2.2706835 | 0 | 1.14E-04 | 0.005 |
| NAKAMURA_ADIPOGENESIS_EARLY_DN                                    | 37  | 0.65027505 | 2.2331877 | 0 | 1.16E-04 | 0.006 |
| JAEGER_METASTASIS_DN                                              | 238 | 0.47823355 | 2.2719688 | 0 | 1.16E-04 | 0.005 |
| PHONG_TNF_RESPONSE_VIA_P38_PARTIAL                                | 148 | 0.50850976 | 2.2344234 | 0 | 1.17E-04 | 0.006 |
| RODWELL_AGING_KIDNEY_UP                                           | 389 | 0.46173692 | 2.2755399 | 0 | 1.18E-04 | 0.005 |
| TONKS_TARGETS_OF_RUNX1_RUNX1T1_FUSION_SUSTAINED_IN_MONOCYTE_UP    | 19  | 0.76047724 | 2.2369332 | 0 | 1.18E-04 | 0.006 |
| PROVENZANI_METASTASIS_DN                                          | 128 | 0.50512034 | 2.2040114 | 0 | 1.19E-04 | 0.007 |
| CHARAFE_BREAST_CANCER_BASAL_VS_MESENCHYMAL_UP                     | 110 | 0.53505325 | 2.2779725 | 0 | 1.19E-04 | 0.005 |
| WU_CELL_MIGRATION                                                 | 172 | 0.49969092 | 2.2412307 | 0 | 1.20E-04 | 0.006 |
| HINATA_NFKB_TARGETS KERATINOCYTE_UP                               | 85  | 0.5482921  | 2.2042303 | 0 | 1.20E-04 | 0.007 |
| TAKEDA_TARGETS_OF_NUP98_HOXA9_FUSION_16D_UP                       | 154 | 0.5083354  | 2.2783363 | 0 | 1.21E-04 | 0.005 |
| GRAHAM_CML_DIVIDING_VS_NORMAL QUIESCENT_DN                        | 87  | 0.5500455  | 2.2438192 | 0 | 1.21E-04 | 0.006 |
| HOFMANN_MYELODYSPLASTIC_SYNDROM_LOW_RISK_DN                       | 27  | 0.6807773  | 2.206232  | 0 | 1.21E-04 | 0.007 |
| HAN_JNK_SIGNALING_UP                                              | 34  | 0.6622097  | 2.2087975 | 0 | 1.22E-04 | 0.007 |
| GRAHAM_CML QUIESCENT_VS_NORMAL QUIESCENT_DN                       | 42  | 0.6194006  | 2.2439706 | 0 | 1.22E-04 | 0.006 |
| AZARE NEOPLASTIC_TRANSFORMATION_BY_STAT3_DN                       | 110 | 0.5112777  | 2.2095742 | 0 | 1.24E-04 | 0.007 |
| ZHU_CMV_8_HR_UP                                                   | 43  | 0.63681257 | 2.2545505 | 0 | 1.24E-04 | 0.006 |
| NAGASHIMA_EGF_SIGNALING_UP                                        | 54  | 0.6140817  | 2.2106383 | 0 | 1.25E-04 | 0.007 |
| PLASARI_TGFB1_TARGETS_10HR_UP                                     | 184 | 0.49289063 | 2.255583  | 0 | 1.25E-04 | 0.006 |
| MCLACHLAN_DENTAL_CARIES_UP                                        | 214 | 0.4683886  | 2.2106895 | 0 | 1.26E-04 | 0.007 |
| KOBAYASHI_EGFR_SIGNALING_24HR_UP                                  | 87  | 0.54260045 | 2.2118568 | 0 | 1.27E-04 | 0.007 |
| GRAESSMANN_RESPONSE_TO_MC_AND_SERUM_DEPRIVATION_UP                | 181 | 0.48390785 | 2.215208  | 0 | 1.29E-04 | 0.007 |
| ELVIDGE_HIF1A_AND_HIF2A_TARGETS_DN                                | 92  | 0.5304791  | 2.2189083 | 0 | 1.30E-04 | 0.007 |
| YAN_ESCAPE_FROM_ANOIKIS                                           | 20  | 0.7461564  | 2.1970735 | 0 | 1.34E-04 | 0.008 |
| GROSS_HYPOXIA_VIA_ELK3_DN                                         | 144 | 0.49250498 | 2.1964855 | 0 | 1.50E-04 | 0.009 |
| VERHAAK_GLIOMASTOMA_NEURAL                                        | 187 | 0.46564093 | 2.181103  | 0 | 1.53E-04 | 0.01  |
| DELPUECH_FOXO3_TARGETS_UP                                         | 64  | 0.5677779  | 2.1811447 | 0 | 1.54E-04 | 0.01  |
| CHANG_IMMORTALIZED_BY_HPV31_DN                                    | 61  | 0.56211007 | 2.1815653 | 0 | 1.55E-04 | 0.01  |
| PRAMOONJAGO_SOX4_TARGETS_UP                                       | 49  | 0.583161   | 2.1830235 | 0 | 1.57E-04 | 0.01  |
| CHARAFE_BREAST_CANCER_LUMINAL_VS_BASAL_DN                         | 412 | 0.4371991  | 2.1831477 | 0 | 1.58E-04 | 0.01  |
| FERRANDO_T_ALL_WITH_MLL_ENL_FUSION_UP                             | 81  | 0.5354423  | 2.1834314 | 0 | 1.60E-04 | 0.01  |
| DUTERTRE ESTRADIOL_RESPONSE_6HR_DN                                | 84  | 0.5485074  | 2.1847484 | 0 | 1.61E-04 | 0.01  |
| MUELLER METHYLATED_IN_GLIOMASTOMA                                 | 36  | 0.64036083 | 2.1862545 | 0 | 1.63E-04 | 0.01  |
| BOYLAN_MULTIPLE_MYELOMA_PCA1_UP                                   | 95  | 0.5243611  | 2.1958058 | 0 | 1.64E-04 | 0.01  |
| SIMBULAN_PARP1_TARGETS_UP                                         | 31  | 0.65348834 | 2.1765664 | 0 | 1.66E-04 | 0.011 |
| WUNDER_INFLAMMATORY_RESPONSE_AND_CHOLESTEROL_UP                   | 47  | 0.59456664 | 2.1723647 | 0 | 1.78E-04 | 0.012 |
| MEISSNER_BRAIN_HCP_WITH_H3K27ME3                                  | 230 | 0.45701182 | 2.173227  | 0 | 1.80E-04 | 0.012 |
| LIU_VAV3_PROSTATE_CARCINOGENESIS_UP                               | 79  | 0.53622323 | 2.1571233 | 0 | 1.99E-04 | 0.014 |
| FRASOR_RESPONSE_TO ESTRADIOL_DN                                   | 76  | 0.5423046  | 2.163517  | 0 | 2.00E-04 | 0.014 |
| GAVIN_PDE3B_TARGETS                                               | 21  | 0.7174318  | 2.1660624 | 0 | 2.02E-04 | 0.014 |
| WIEDERSCHAIN_TARGETS_OF_BMI1_AND_PCGF2                            | 53  | 0.5834365  | 2.1667643 | 0 | 2.04E-04 | 0.014 |
| BILD_HRAS_ONCOGENIC_SIGNATURE                                     | 229 | 0.4579762  | 2.1708772 | 0 | 2.06E-04 | 0.014 |
| TONKS_TARGETS_OF_RUNX1_RUNX1T1_FUSION_HSC_UP                      | 169 | 0.47748387 | 2.1473613 | 0 | 2.32E-04 | 0.017 |
| JECHLINGER_EPITHELIAL_TO_MESENCHYMAL_TRANSITION_UP                | 66  | 0.5559945  | 2.147612  | 0 | 2.34E-04 | 0.017 |
| RICKMAN_TUMOR_DIFFERENTIATED_WELL_VS_POORLY_DN                    | 335 | 0.43521303 | 2.147667  | 0 | 2.36E-04 | 0.017 |
| NAKAYAMA_SOFT_TISSUE_TUMORS_PCA1_UP                               | 66  | 0.5517411  | 2.1479897 | 0 | 2.38E-04 | 0.017 |
| RUIZ_TNC_TARGETS_UP                                               | 137 | 0.49069202 | 2.1520205 | 0 | 2.40E-04 | 0.017 |
| JI_METASTASIS_REPRESSED_BY_STK11                                  | 26  | 0.68064874 | 2.1440916 | 0 | 2.44E-04 | 0.018 |
| TONKS_TARGETS_OF_RUNX1_RUNX1T1_FUSION_SUSTAINED_IN_ERYTHROCYTE_UP | 43  | 0.59654593 | 2.141974  | 0 | 2.69E-04 | 0.02  |
| PARK_APL_PATHOGENESIS_DN                                          | 45  | 0.6058055  | 2.1359363 | 0 | 2.76E-04 | 0.021 |
| HIRSCH_CELLULAR_TRANSFORMATION_SIGNATURE_UP                       | 220 | 0.4622152  | 2.136984  | 0 | 2.78E-04 | 0.021 |
| DEMAGALHAES_AGING_UP                                              | 50  | 0.5822762  | 2.1384237 | 0 | 2.80E-04 | 0.021 |
| AIYAR_COBRA1_TARGETS_UP                                           | 34  | 0.6386619  | 2.1327837 | 0 | 3.00E-04 | 0.023 |
| RODWELL_AGING_KIDNEY_NO_BLOOD_UP                                  | 189 | 0.46798623 | 2.1324275 | 0 | 3.10E-04 | 0.024 |
| HAMAI_APOPTOSIS_VIA_TRAIL_DN                                      | 157 | 0.4758844  | 2.1312423 | 0 | 3.20E-04 | 0.025 |
| JISON_SICKLE_CELL_DISEASE_UP                                      | 170 | 0.47640413 | 2.1255198 | 0 | 3.31E-04 | 0.026 |
| COLIN_PILOCYTIC_ASTROCYTOMA_VS_GLIOMASTOMA_UP                     | 35  | 0.63633466 | 2.1244948 | 0 | 3.41E-04 | 0.027 |
| HELLEBREKERS_SILENCED_DURING_TUMOR_ANGIOGENESIS                   | 75  | 0.5393204  | 2.12262   | 0 | 3.51E-04 | 0.028 |
| GUENTHER_GROWTH_SPHERICAL_VS_ADHERENT_DN                          | 25  | 0.6610327  | 2.1122394 | 0 | 3.65E-04 | 0.03  |
| YAO_TEMPORAL_RESPONSE_TO_PROGESTERONE_CLUSTER_9                   | 69  | 0.53848356 | 2.1127837 | 0 | 3.68E-04 | 0.03  |
| NEMETH_INFLAMMATORY_RESPONSE_LPS_UP                               | 83  | 0.5251709  | 2.113452  | 0 | 3.70E-04 | 0.03  |
| LIANG_SILENCED_BY METHYLATION_UP                                  | 28  | 0.66625285 | 2.1141496 | 0 | 3.73E-04 | 0.03  |
| LIAN_NEUTROPHIL_GRANULE_CONSTITUENTS                              | 24  | 0.67830724 | 2.109071  | 0 | 3.75E-04 | 0.03  |
| ZHAN_MULTIPLE_MYELOMA_LB_DN                                       | 36  | 0.6177069  | 2.1012945 | 0 | 4.21E-04 | 0.034 |
| DASU_IL6_SIGNALING_UP                                             | 55  | 0.5535253  | 2.0956793 | 0 | 4.51E-04 | 0.037 |
| BURTON_ADIPOGENESIS_7                                             | 47  | 0.5819035  | 2.0967522 | 0 | 4.54E-04 | 0.037 |
| COATES_MACROPHAGE_M1_VS_M2_DN                                     | 60  | 0.558115   | 2.0932422 | 0 | 4.80E-04 | 0.039 |
| WANG_BARRETTES_ESOPHAGUS_UP                                       | 40  | 0.59201    | 2.0939667 | 0 | 4.83E-04 | 0.039 |
| CASTELLANO_NRAS_TARGETS_UP                                        | 60  | 0.5494275  | 2.0896251 | 0 | 4.88E-04 | 0.04  |
| ZHANG_ANTIVIRAL_RESPONSE_TO_RIBAVIRIN_UP                          | 26  | 0.6704639  | 2.0887477 | 0 | 4.97E-04 | 0.041 |
| HUANG_FOXA2_TARGETS_DN                                            | 35  | 0.61564445 | 2.0866747 | 0 | 5.05E-04 | 0.042 |
| KAAB_FAILED_HEART_VENTRICLE_DN                                    | 35  | 0.6130022  | 2.070523  | 0 | 5.19E-04 | 0.046 |
| SMID_BREAST_CANCER_ERBB2_UP                                       | 126 | 0.48225307 | 2.0705807 | 0 | 5.23E-04 | 0.046 |
| MARSON_FOXP3_TARGETS_UP                                           | 61  | 0.5533455  | 2.071895  | 0 | 5.26E-04 | 0.046 |
| BOSCO_EPITHELIAL_DIFFERENTIATION_MODULE                           | 57  | 0.551242   | 2.069138  | 0 | 5.27E-04 | 0.047 |
| ZHAN_MULTIPLE_MYELOMA_SPIKED                                      | 20  | 0.6992107  | 2.0721054 | 0 | 5.29E-04 | 0.046 |
| QI_HYPOXIA_TARGETS_OF_HIF1A_AND_FOXA2                             | 36  | 0.60543156 | 2.0779402 | 0 | 5.32E-04 | 0.045 |
| BURTON_ADIPOGENESIS_1                                             | 32  | 0.6051996  | 2.0743957 | 0 | 5.33E-04 | 0.046 |

|                                                       |     |            |           |   |            |       |
|-------------------------------------------------------|-----|------------|-----------|---|------------|-------|
| ZUCCHI_METASTASIS_DN                                  | 41  | 0.5972896  | 2.0810902 | 0 | 5.36E-04   | 0.045 |
| LEI_MYB_TARGETS                                       | 298 | 0.42957202 | 2.0756254 | 0 | 5.36E-04   | 0.046 |
| FERREIRA_EWINGS_SARCOMA_UNSTABLE_VS_STABLE_DN         | 80  | 0.5203834  | 2.0759633 | 0 | 5.40E-04   | 0.046 |
| HUPER_BREAST_BASAL_VS_LUMINAL_UP                      | 51  | 0.5617432  | 2.066769  | 0 | 5.45E-04   | 0.049 |
| TAVOR_CEBPA_TARGETS_DN                                | 28  | 0.63783836 | 2.060892  | 0 | 6.26E-04   | 0.057 |
| SATO_SILENCED_BY_METHYLATION_IN_PANCREATIC_CANCER_1   | 375 | 0.41368696 | 2.0561216 | 0 | 6.42E-04   | 0.06  |
| KEEN_RESPONSE_TO_ROSIGLITAZONE_DN                     | 96  | 0.49603128 | 2.0581543 | 0 | 6.46E-04   | 0.06  |
| MIKKELSEN_IPS_LCP_WITH_H3K4ME3                        | 138 | 0.46803522 | 2.0585828 | 0 | 6.50E-04   | 0.06  |
| ENK_UV_RESPONSE_KERATINOCYTE_UP                       | 486 | 0.40602797 | 2.059411  | 0 | 6.54E-04   | 0.06  |
| SATO_SILENCED_BY_DEACETYLATION_IN_PANCREATIC_CANCER   | 39  | 0.5716595  | 2.0491786 | 0 | 7.21E-04   | 0.067 |
| GAVIN_FOXP3_TARGETS_CLUSTER_P7                        | 78  | 0.507908   | 2.047471  | 0 | 7.58E-04   | 0.071 |
| FRIDMAN_SENESCENCE_UP                                 | 72  | 0.5192101  | 2.0413    | 0 | 8.43E-04   | 0.08  |
| VERRECCHIA_EARLY_RESPONSE_TO_TGFB1                    | 53  | 0.5441138  | 2.0410876 | 0 | 8.59E-04   | 0.082 |
| SAGIV_CD24_TARGETS_DN                                 | 43  | 0.5820791  | 2.0396707 | 0 | 8.64E-04   | 0.083 |
| MCBRYAN_PUBERTAL_BREAST_4_5WK_UP                      | 250 | 0.4268999  | 2.0375047 | 0 | 9.08E-04   | 0.087 |
| ZHANG_TLX_TARGETS_36HR_UP                             | 207 | 0.43711784 | 2.035886  | 0 | 9.32E-04   | 0.09  |
| MAHADEVAN_RESPONSE_TO_MP470_UP                        | 19  | 0.71814394 | 2.0357141 | 0 | 9.36E-04   | 0.091 |
| FULCHER_INFLAMMATORY_RESPONSE_LLECTIN_VS_LPS_DN       | 391 | 0.4086167  | 2.0325003 | 0 | 9.39E-04   | 0.093 |
| XU_HGF_SIGNALING_NOT_VIA_AKT1_48HR_UP                 | 31  | 0.6146287  | 2.0329664 | 0 | 9.40E-04   | 0.093 |
| MIKKELSEN_MCV6_HCP_WITH_H3K27ME3                      | 379 | 0.41214988 | 2.0349169 | 0 | 9.41E-04   | 0.092 |
| PHONG_TNF_RESPONSE_NOT_VIA_P38                        | 317 | 0.4184202  | 2.0325131 | 0 | 9.44E-04   | 0.093 |
| MANALO_HYPOXIA_UP                                     | 187 | 0.44453603 | 2.0337877 | 0 | 9.45E-04   | 0.093 |
| ZHANG_TLX_TARGETS_60HR_UP                             | 269 | 0.42524993 | 2.0310314 | 0 | 9.52E-04   | 0.095 |
| MIKKELSEN_NPC_HCP_WITH_H3K4ME3_AND_H3K27ME3           | 193 | 0.4403945  | 2.0269186 | 0 | 9.89E-04   | 0.099 |
| GRAHAM_NORMAL_QUIESCENT_VS_NORMAL_DIVIDING_UP         | 61  | 0.5293056  | 2.027531  | 0 | 9.94E-04   | 0.099 |
| BURTON_ADIPOGENESIS_8                                 | 76  | 0.50683147 | 2.0216577 | 0 | 0.00103961 | 0.104 |
| UROSEVIC_RESPONSE_TO_IMIQUIMOD                        | 21  | 0.6816274  | 2.020763  | 0 | 0.00104309 | 0.105 |
| GU_PDEF_TARGETS_DN                                    | 35  | 0.5979395  | 2.0194077 | 0 | 0.00106503 | 0.108 |
| AIGNER_ZEB1_TARGETS                                   | 32  | 0.60024774 | 2.0187483 | 0 | 0.00109658 | 0.112 |
| HUMMERICH_SKIN_CANCER_PROGRESSION_UP                  | 84  | 0.49662608 | 2.0161242 | 0 | 0.00112184 | 0.116 |
| HUANG_DASATINIB_RESISTANCE_UP                         | 72  | 0.50686014 | 2.0162473 | 0 | 0.00112788 | 0.116 |
| LIU_SMARCA4_TARGETS                                   | 56  | 0.53227466 | 2.013655  | 0 | 0.00117892 | 0.121 |
| ROZANOV_MMP14_TARGETS_UP                              | 235 | 0.42501345 | 2.0099065 | 0 | 0.00123534 | 0.126 |
| CHIARADONNA_NEOPLASTIC_TRANSFORMATION_KRAS_CDC25_UP   | 51  | 0.5472883  | 2.008028  | 0 | 0.00124225 | 0.127 |
| AMIT_EGF_RESPONSE_60_MCF10A                           | 36  | 0.5894771  | 2.008202  | 0 | 0.00124875 | 0.127 |
| HOFFMANN_PRE_BI_TO_LARGE_PRE_BII_LYMPHOCYTE_DN        | 64  | 0.51689166 | 2.0085135 | 0 | 0.00125533 | 0.127 |
| LI_AMPLIFIED_IN_LUNG_CANCER                           | 160 | 0.4499257  | 2.0041442 | 0 | 0.00131497 | 0.135 |
| CROONQUIST_IL6_DEPRIVATION_UP                         | 18  | 0.70276916 | 2.0019073 | 0 | 0.00134294 | 0.138 |
| CROMER_TUMORIGENESIS_UP                               | 58  | 0.52800995 | 2.0017502 | 0 | 0.00134485 | 0.139 |
| LI_INDUCED_T_TO_NATURAL_KILLER_UP                     | 271 | 0.4161125  | 1.994811  | 0 | 0.00134833 | 0.145 |
| BASSO_CD40_SIGNALING_UP                               | 95  | 0.47768593 | 1.9973916 | 0 | 0.00135504 | 0.145 |
| KIM_RESPONSE_TO_TSA_AND_DECITABINE_UP                 | 113 | 0.4701203  | 2.0014255 | 0 | 0.00135507 | 0.141 |
| BROWN_MYELOID_CELL_DEVELOPMENT_UP                     | 145 | 0.45310965 | 1.9975412 | 0 | 0.00136181 | 0.145 |
| CHIARADONNA_NEOPLASTIC_TRANSFORMATION_CDC25_DN        | 137 | 0.4545374  | 1.9987465 | 0 | 0.00136865 | 0.145 |
| HINATA_NFKB_TARGETS_KERATINOCYTE_DN                   | 22  | 0.6538606  | 1.9987885 | 0 | 0.00137557 | 0.145 |
| TARTE_PLASMA_CELL_VS_PLASMABLAST_UP                   | 346 | 0.40401727 | 1.9991639 | 0 | 0.00138255 | 0.145 |
| LEE_LIVER_CANCER_ACOX1_UP                             | 61  | 0.52394754 | 1.9904345 | 0 | 0.00144375 | 0.155 |
| ELVIDGE_HIF1A_TARGETS_DN                              | 79  | 0.4923666  | 1.9912844 | 0 | 0.00145086 | 0.155 |
| PACHER_TARGETS_OF_IGF1_AND_IGF2_UP                    | 35  | 0.5888134  | 1.988802  | 0 | 0.00146267 | 0.158 |
| KERLEY_RESPONSE_TO_CISPLATIN_UP                       | 40  | 0.56724507 | 1.9879392 | 0 | 0.00146402 | 0.159 |
| ZHANG_TLX_TARGETS_DN                                  | 101 | 0.47974476 | 1.9889054 | 0 | 0.0014698  | 0.158 |
| WANG_BARRETTES_ESOPHAGUS_DN                           | 25  | 0.63709235 | 1.985672  | 0 | 0.00150577 | 0.165 |
| BRUECKNER_TARGETS_OF_MIRLET7A3_DN                     | 72  | 0.50188315 | 1.9840701 | 0 | 0.00151531 | 0.167 |
| YAMAZAKI_TCEB3_TARGETS_UP                             | 162 | 0.43292063 | 1.9842719 | 0 | 0.00152256 | 0.167 |
| KOHOUTEK_CCNT1_TARGETS                                | 42  | 0.56694543 | 1.9818066 | 0 | 0.00152396 | 0.169 |
| NOJIMA_SFRP2_TARGETS_DN                               | 23  | 0.6425267  | 1.9799802 | 0 | 0.00155081 | 0.173 |
| LEIN_ASTROCYTE_MARKERS                                | 39  | 0.5774429  | 1.9795852 | 0 | 0.0015592  | 0.175 |
| HUMMERICH_MALIGNANT_SKIN_TUMOR_UP                     | 15  | 0.72617567 | 1.9783219 | 0 | 0.00159129 | 0.178 |
| WINTER_HYPOXIA_METAGENE                               | 218 | 0.41765454 | 1.9777567 | 0 | 0.00159957 | 0.18  |
| WANG_ESOPHAGUS_CANCER_VS_NORMAL_UP                    | 105 | 0.46661377 | 1.977002  | 0 | 0.00160824 | 0.182 |
| TARTE_PLASMA_CELL_VS_B_LYMPHOCYTE_UP                  | 70  | 0.50598025 | 1.9747173 | 0 | 0.0016411  | 0.187 |
| COLDREN_GEFITINIB_RESISTANCE_DN                       | 203 | 0.42620158 | 1.9749429 | 0 | 0.00164862 | 0.187 |
| GENTILE_UV_LOW_DOSE_UP                                | 23  | 0.62804884 | 1.9726107 | 0 | 0.00165684 | 0.19  |
| MIKKELSEN_MCV6_LCP_WITH_H3K4ME3                       | 135 | 0.4487092  | 1.9729822 | 0 | 0.00165695 | 0.189 |
| DIRMEIER_LMP1_RESPONSE_EARLY                          | 65  | 0.5083239  | 1.9717991 | 0 | 0.00166453 | 0.192 |
| GARGALOVIC_RESPONSE_TO_OXIDIZED_PHOSPHOLIPIDS_GREY_DN | 55  | 0.5199415  | 1.9677945 | 0 | 0.00174908 | 0.201 |
| GESERICK_TERT_TARGETS_DN                              | 20  | 0.6627339  | 1.9621431 | 0 | 0.00183306 | 0.211 |
| YAO_TEMPORAL_RESPONSE_TO_PROGESTERONE_CLUSTER_5       | 27  | 0.6094216  | 1.9610964 | 0 | 0.00184756 | 0.214 |
| CHIARADONNA_NEOPLASTIC_TRANSFORMATION_KRAS_DN         | 133 | 0.44048533 | 1.9604095 | 0 | 0.00187701 | 0.219 |
| RODRIGUES_NTN1_TARGETS_DN                             | 133 | 0.44381094 | 1.9582734 | 0 | 0.00195096 | 0.229 |
| WORSCHER_TUMOR_REJECTION_UP                           | 51  | 0.5376549  | 1.9569465 | 0 | 0.00197236 | 0.232 |
| LEONARD_HYPOXIA                                       | 44  | 0.5458048  | 1.9551346 | 0 | 0.00199196 | 0.235 |
| ZHOU_INFLAMMATORY_RESPONSE_LPS_UP                     | 357 | 0.3918461  | 1.9556006 | 0 | 0.00199301 | 0.234 |
| HORIUCHI_WTAP_TARGETS_UP                              | 254 | 0.41330746 | 1.9539512 | 0 | 0.00204116 | 0.241 |
| BURTON_ADIPOGENESIS_PEAK_AT_2HR                       | 50  | 0.5373255  | 1.9507618 | 0 | 0.00215428 | 0.255 |
| BANDRES_RESPONSE_TO_CARMUSTIN_MGMT_48HR_DN            | 153 | 0.44067907 | 1.9508591 | 0 | 0.00216352 | 0.255 |
| SABATES_COLORECTAL_ADENOMA_UP                         | 122 | 0.452054   | 1.9496477 | 0 | 0.00218137 | 0.257 |
| ZHANG_PROLIFERATING_VS_QUIESCENT                      | 48  | 0.53636044 | 1.9490502 | 0 | 0.00220046 | 0.261 |
| KAMIKUBO_MYELOID_CEBPA_NETWORK                        | 28  | 0.5972733  | 1.9457998 | 0 | 0.00227747 | 0.27  |

|                                                        |     |            |           |   |            |       |
|--------------------------------------------------------|-----|------------|-----------|---|------------|-------|
| DELACROIX_RARG_BOUND_MEF                               | 326 | 0.39684162 | 1.9452043 | 0 | 0.00229611 | 0.273 |
| GEISS_RESPONSE_TO_DSRNA_UP                             | 33  | 0.57845074 | 1.9430585 | 0 | 0.00231703 | 0.275 |
| PATTERSON_DOCETAXEL_RESISTANCE                         | 28  | 0.6103417  | 1.9433774 | 0 | 0.00231947 | 0.275 |
| HAN_SATB1_TARGETS_DN                                   | 388 | 0.39028168 | 1.943468  | 0 | 0.00232917 | 0.275 |
| AMIT_SERUM_RESPONSE_60_MCF10A                          | 56  | 0.5166964  | 1.9425364 | 0 | 0.00233541 | 0.279 |
| YAMASHITA_METHYLATED_IN_PROSTATE_CANCER                | 49  | 0.5318164  | 1.9411712 | 0 | 0.00236035 | 0.282 |
| LEE_LIVER_CANCER_MYC_TGFA_UP                           | 57  | 0.5121595  | 1.9404808 | 0 | 0.00237817 | 0.285 |
| TRAYNOR_RETT_SYNDROM_UP                                | 40  | 0.56881064 | 1.9400675 | 0 | 0.00238889 | 0.288 |
| XU_HGF_TARGETS_INDUCED_BY_AKT1_6HR                     | 19  | 0.6685791  | 1.9382788 | 0 | 0.00242057 | 0.293 |
| MCBRYAN_PUBERTAL_TGFB1_TARGETS_UP                      | 158 | 0.43294418 | 1.9343004 | 0 | 0.0025614  | 0.309 |
| FERRARI_RESPONSE_TO_FENRETINIDE_UP                     | 18  | 0.6789848  | 1.9332161 | 0 | 0.00256445 | 0.313 |
| BASAKI_YBX1_TARGETS_DN                                 | 318 | 0.39925286 | 1.9336182 | 0 | 0.00257142 | 0.312 |
| HELLER_SILENCED_BY_METHYLATION_UP                      | 241 | 0.40882346 | 1.9321061 | 0 | 0.00259192 | 0.317 |
| WEINMANN_ADAPTATION_TO_HYPOXIA_DN                      | 37  | 0.5560344  | 1.9313772 | 0 | 0.00260199 | 0.32  |
| BAELDE_DIABETIC_NEPHROPATHY_DN                         | 406 | 0.38352677 | 1.9307029 | 0 | 0.00260801 | 0.322 |
| BOQUEST_STEM_CELL_DN                                   | 196 | 0.41363665 | 1.9303021 | 0 | 0.00261133 | 0.323 |
| TIEN_INTESTINE_PROBIOTICS_24HR_DN                      | 195 | 0.41946998 | 1.9279506 | 0 | 0.00269587 | 0.337 |
| KHETCHOUMIAN_TRIM24_TARGETS_UP                         | 44  | 0.53764004 | 1.928077  | 0 | 0.00270015 | 0.336 |
| MENSE_HYPOXIA_UP                                       | 81  | 0.4716533  | 1.9257642 | 0 | 0.00279331 | 0.352 |
| FLECHNER_BIOPSY_KIDNEY_TRANSPLANT_REJECTED_VS_OK_UP    | 81  | 0.4712955  | 1.9221956 | 0 | 0.00294741 | 0.373 |
| WALLACE_PROSTATE_CANCER_RACE_UP                        | 254 | 0.4035075  | 1.9208827 | 0 | 0.00296382 | 0.377 |
| DANG_REGULATED_BY_MYC_DN                               | 232 | 0.40834054 | 1.9182451 | 0 | 0.00299477 | 0.387 |
| PETROVA_PROX1_TARGETS_DN                               | 62  | 0.49841514 | 1.9195247 | 0 | 0.00299799 | 0.384 |
| SMID_BREAST_CANCER_RELAPSE_IN_BONE_DN                  | 276 | 0.39595148 | 1.9184316 | 0 | 0.0029997  | 0.386 |
| MEISSNER_NPC_HCP_WITH_H3K27ME3                         | 71  | 0.4885445  | 1.9169586 | 0 | 0.00302728 | 0.39  |
| SMIRNOV_CIRCULATING_ENDOTHELIOCYTES_IN_CANCER_UP       | 150 | 0.42742363 | 1.9129423 | 0 | 0.00311167 | 0.4   |
| ODONNELL_TFRC_TARGETS_UP                               | 352 | 0.38662443 | 1.9116625 | 0 | 0.00316399 | 0.405 |
| LEE_LIVER_CANCER_E2F1_UP                               | 57  | 0.5012397  | 1.9097416 | 0 | 0.00326478 | 0.416 |
| NAKAMURA_METASTASIS_MODEL_DN                           | 39  | 0.54612887 | 1.9088305 | 0 | 0.0032907  | 0.42  |
| POTTI_ADRIAMYCIN_SENSITIVITY                           | 73  | 0.48135382 | 1.9076846 | 0 | 0.0033097  | 0.424 |
| GROSS_HYPOXIA_VIA_ELK3_AND_HIF1A_UP                    | 131 | 0.43875644 | 1.9061816 | 0 | 0.00337375 | 0.431 |
| HARRIS_HYPOXIA                                         | 77  | 0.47737557 | 1.9048309 | 0 | 0.00342361 | 0.437 |
| BROWNE_HCMV_INFECTION_4HR_UP                           | 50  | 0.5194882  | 1.9040031 | 0 | 0.00344186 | 0.44  |
| ONDER_CDH1_SIGNALING_VIA_CTNNB1                        | 78  | 0.46990636 | 1.9009652 | 0 | 0.00357048 | 0.452 |
| RIGGINS_TAMOXIFEN_RESISTANCE_DN                        | 203 | 0.40754256 | 1.8986264 | 0 | 0.00366806 | 0.461 |
| VANDESLUIS_COMMD1_TARGETS_GROUP_3_UP                   | 81  | 0.4629367  | 1.8981285 | 0 | 0.00367932 | 0.463 |
| SWEET_KRAS_TARGETS_UP                                  | 73  | 0.4778792  | 1.893543  | 0 | 0.00384181 | 0.484 |
| KIM_WT1_TARGETS_UP                                     | 196 | 0.40910417 | 1.8921056 | 0 | 0.00389881 | 0.495 |
| SWEET_LUNG_CANCER_KRAS_UP                              | 436 | 0.37611434 | 1.886469  | 0 | 0.00415874 | 0.511 |
| FALVELLA_SMOKERS_WITH_LUNG_CANCER                      | 68  | 0.47959784 | 1.8853436 | 0 | 0.00422717 | 0.52  |
| WOO_LIVER_CANCER_RECURRENCE_UP                         | 95  | 0.45532373 | 1.8837088 | 0 | 0.00427768 | 0.525 |
| TURASHVILI_BREAST_DUCTAL_CARCINOMA_VS_DUCTAL_NORMAL_DN | 171 | 0.41613138 | 1.8825046 | 0 | 0.00432747 | 0.53  |
| BAE_BRCA1_TARGETS_UP                                   | 69  | 0.47948995 | 1.8819568 | 0 | 0.00434786 | 0.533 |
| SESTO_RESPONSE_TO_UV_C1                                | 63  | 0.49012515 | 1.880746  | 0 | 0.00438627 | 0.538 |
| ONDER_CDH1_TARGETS_1_UP                                | 120 | 0.4359501  | 1.8790674 | 0 | 0.00443853 | 0.545 |
| LIM_MAMMARY_LUMINAL_PROGENITOR_UP                      | 54  | 0.49863148 | 1.8776418 | 0 | 0.0044934  | 0.549 |
| KIM_WT1_TARGETS_12HR_UP                                | 150 | 0.4253584  | 1.8769075 | 0 | 0.00451835 | 0.55  |
| LAIHO_COLORECTAL_CANCER_SERRATED_UP                    | 99  | 0.4488743  | 1.8759574 | 0 | 0.00456703 | 0.556 |
| CONCANNON_APOPTOSIS_BY_EPOXOMICIN_UP                   | 214 | 0.40255952 | 1.8740681 | 0 | 0.00465707 | 0.568 |
| ISSAEVA_MLL2_TARGETS                                   | 53  | 0.5040147  | 1.8742864 | 0 | 0.00467285 | 0.568 |
| LIAN_LIPA_TARGETS_6M                                   | 65  | 0.48969096 | 1.8725555 | 0 | 0.00474077 | 0.573 |
| MIKKELSEN_ES_LCP_WITH_H3K4ME3                          | 104 | 0.45119813 | 1.8719605 | 0 | 0.00474206 | 0.574 |
| TAKEDA_TARGETS_OF_NUP98_HOXA9_FUSION_10D_DN            | 128 | 0.4282269  | 1.8706425 | 0 | 0.00479493 | 0.582 |
| CHEOK_RESPONSE_TO_HD_MTX_UP                            | 17  | 0.66367865 | 1.8688164 | 0 | 0.00483892 | 0.595 |
| MCLACHLAN_DENTAL_CARIES_DN                             | 212 | 0.40461177 | 1.8694316 | 0 | 0.00484177 | 0.591 |
| DUNNE_TARGETS_OF_AML1_MTG8_FUSION_UP                   | 44  | 0.5238567  | 1.8688883 | 0 | 0.00484927 | 0.594 |
| SENGUPTA_EBNA1_ANTICORRELATED                          | 130 | 0.4277105  | 1.8679991 | 0 | 0.00485206 | 0.597 |
| YAO_TEMPORAL_RESPONSE_TO_PROGESTERONE_CLUSTER_6        | 69  | 0.485492   | 1.8696663 | 0 | 0.00485785 | 0.591 |
| ENGELMANN_CANCER_PROGENITORS_UP                        | 43  | 0.52351934 | 1.8664061 | 0 | 0.00490793 | 0.6   |
| ONDER_CDH1_TARGETS_3_DN                                | 53  | 0.5033523  | 1.865228  | 0 | 0.00495217 | 0.602 |
| WIERENGA_STAT5A_TARGETS_UP                             | 194 | 0.40574744 | 1.8650227 | 0 | 0.00495253 | 0.602 |
| DAUER_STAT3_TARGETS_UP                                 | 48  | 0.51795954 | 1.8644278 | 0 | 0.0049645  | 0.606 |
| LEE_AGING_CEREBELLUM_UP                                | 79  | 0.4601765  | 1.860666  | 0 | 0.00515562 | 0.629 |
| SWEET_KRAS_ONCOGENIC_SIGNATURE                         | 84  | 0.4560225  | 1.8588103 | 0 | 0.00519777 | 0.634 |
| MOHANKUMAR_TLX1_TARGETS_DN                             | 148 | 0.4163774  | 1.8590572 | 0 | 0.00519852 | 0.633 |
| CREIGHTON_ENDOCRINE_THERAPY_RESISTANCE_5               | 415 | 0.37207228 | 1.8591255 | 0 | 0.00521508 | 0.633 |
| CORRE_MULTIPLE_MYELOMA_UP                              | 61  | 0.4836337  | 1.855092  | 0 | 0.00544888 | 0.651 |
| WILSON_PROTEASES_AT_TUMOR_BONE_INTERFACE_UP            | 20  | 0.6288986  | 1.8518226 | 0 | 0.00558562 | 0.663 |
| MCBRYAN_PUBERTAL_BREAST_3_4WK_UP                       | 198 | 0.39569753 | 1.8507646 | 0 | 0.00564785 | 0.666 |
| KARLSSON_TGFB1_TARGETS_DN                              | 181 | 0.40061003 | 1.8478891 | 0 | 0.00583827 | 0.68  |
| MCBRYAN_PUBERTAL_TGFB1_TARGETS_DN                      | 59  | 0.48706684 | 1.8422779 | 0 | 0.00620233 | 0.696 |
| DIRMEIER_LMP1_RESPONSE_LATE_UP                         | 53  | 0.49730232 | 1.8425359 | 0 | 0.00621598 | 0.696 |
| LU_EZH2_TARGETS_UP                                     | 218 | 0.3945471  | 1.8397058 | 0 | 0.00637101 | 0.705 |
| CHIBA_RESPONSE_TO_TSA_UP                               | 48  | 0.50004286 | 1.8390446 | 0 | 0.00637367 | 0.707 |
| BROWNE_HCMV_INFECTION_24HR_DN                          | 142 | 0.413954   | 1.8334737 | 0 | 0.00664144 | 0.729 |
| NELSON_RESPONSE_TO_ANDROGEN_UP                         | 79  | 0.4501096  | 1.83209   | 0 | 0.00667262 | 0.732 |
| HOSHIDA_LIVER_CANCER_SUBCLASS_S1                       | 214 | 0.39476246 | 1.8279074 | 0 | 0.00688823 | 0.748 |
| WANG_SMARCE1_TARGETS_UP                                | 257 | 0.3835885  | 1.828318  | 0 | 0.00688834 | 0.745 |
| VILIMAS_NOTCH1_TARGETS_UP                              | 48  | 0.49899793 | 1.8261824 | 0 | 0.00698754 | 0.756 |

|                                                    |     |            |           |   |            |       |
|----------------------------------------------------|-----|------------|-----------|---|------------|-------|
| DORN_ADENOVIRUS_INFECTION_32HR_DN                  | 35  | 0.5377247  | 1.8262174 | 0 | 0.0070081  | 0.756 |
| WANG_CLIM2_TARGETS_DN                              | 155 | 0.41110462 | 1.825248  | 0 | 0.00705749 | 0.761 |
| PASQUALUCCI_LYMPHOMA_BY_GC_STAGE_UP                | 249 | 0.3835043  | 1.8233693 | 0 | 0.00714554 | 0.77  |
| WILCOX_PRESPONSE_TO_ROGESTERONE_DN                 | 52  | 0.49206    | 1.8200248 | 0 | 0.00731417 | 0.782 |
| LIAN_LIPA_TARGETS_3M                               | 51  | 0.489297   | 1.8201004 | 0 | 0.00732995 | 0.782 |
| LEE_EARLY_T_LYMPHOCYTE_DN                          | 48  | 0.5023487  | 1.8175197 | 0 | 0.00749278 | 0.79  |
| MEISSNER_NPC_HCP_WITH_H3K4ME3_AND_H3K27ME3         | 130 | 0.4119506  | 1.8140593 | 0 | 0.00775371 | 0.795 |
| AMIT_EGF_RESPONSE_60_HELA                          | 40  | 0.52281344 | 1.8111515 | 0 | 0.00789522 | 0.805 |
| RICKMAN_TUMOR_DIFFERENTIATED_WELL_VS_MODERATELY_DN | 102 | 0.43695045 | 1.8120636 | 0 | 0.00790151 | 0.804 |
| HUANG_GATA2_TARGETS_UP                             | 132 | 0.41667715 | 1.8112808 | 0 | 0.00790783 | 0.805 |
| MARTINEZ_RESPONSE_TO TRABECTEDIN_UP                | 60  | 0.4730671  | 1.8084131 | 0 | 0.00812428 | 0.818 |
| EBAUER_MYOGENIC_TARGETS_OF_PAX3_FOXO1_FUSION       | 47  | 0.49972138 | 1.806866  | 0 | 0.00821578 | 0.822 |
| MARTORIATI_MDM4_TARGETS_NEUROEPITHELIUM_UP         | 149 | 0.39937517 | 1.8054127 | 0 | 0.00829686 | 0.825 |
| WIERENGA_STAT5A_TARGETS_GROUP1                     | 123 | 0.41710427 | 1.8047476 | 0 | 0.0083297  | 0.827 |
| BIDUS_METASTASIS_DN                                | 138 | 0.40918615 | 1.803015  | 0 | 0.00838301 | 0.834 |
| SCHRAETS_MLL_TARGETS_DN                            | 31  | 0.54147947 | 1.8015984 | 0 | 0.00839762 | 0.838 |
| RUTELLA_RESPONSE_TO_CSF2RB_AND_IL4_DN              | 279 | 0.37401628 | 1.8036634 | 0 | 0.00840569 | 0.833 |
| CROONQUIST_STROMAL_STIMULATION_UP                  | 55  | 0.4751879  | 1.8016548 | 0 | 0.0084205  | 0.838 |
| ZWANG_CLASS_1_TRANSIENTLY_INDUCED_BY_EGF           | 448 | 0.35772514 | 1.8037784 | 0 | 0.00842891 | 0.833 |
| ABE_INNER_EAR                                      | 42  | 0.50670695 | 1.8009855 | 0 | 0.00843079 | 0.838 |
| TSUNODA_CISPLATIN_RESISTANCE_DN                    | 43  | 0.51538944 | 1.800096  | 0 | 0.00847702 | 0.838 |
| UDAYAKUMAR_MED1_TARGETS_DN                         | 213 | 0.3852352  | 1.7958953 | 0 | 0.00882928 | 0.849 |
| LABBE_TARGETS_OF_TGFB1_AND_WNT3A_DN                | 101 | 0.42347392 | 1.7908126 | 0 | 0.00924265 | 0.863 |
| BERENJENO_ROCK_SIGNALING_NOT_VIA_RHOA_DN           | 46  | 0.49732763 | 1.7910091 | 0 | 0.00925375 | 0.863 |
| CLASPER_LYMPHATIC_VESSELS_DURING_METASTASIS_DN     | 33  | 0.5426584  | 1.7901481 | 0 | 0.00930439 | 0.869 |
| CHARAFE_BREAST_CANCER_LUMINAL_VS_MESENCHYMAL_UP    | 389 | 0.3542514  | 1.7847431 | 0 | 0.00981496 | 0.883 |
| RUTELLA_RESPONSE_TO_HGF_VS_CSF2RB_AND_IL4_UP       | 369 | 0.36339152 | 1.7815108 | 0 | 0.01012463 | 0.893 |
| BROCKE_APOPTOSIS_REVERSED_BY_IL6                   | 135 | 0.40581033 | 1.7773131 | 0 | 0.01050039 | 0.906 |
| NATSUME_RESPONSE_TO_INTERFERON_BETA_UP             | 66  | 0.45853928 | 1.7757518 | 0 | 0.01059939 | 0.907 |
| CHEN_LVAD_SUPPORT_OF_FAILING_HEART_UP              | 96  | 0.41305226 | 1.7690454 | 0 | 0.01124486 | 0.921 |
| GAUSSMANN_MLL_AF4_FUSION_TARGETS_F_UP              | 173 | 0.3885792  | 1.7669854 | 0 | 0.01144622 | 0.928 |
| BOYLAN_MULTIPLE_MYELOMA_C_D_DN                     | 234 | 0.36956382 | 1.7661303 | 0 | 0.01150837 | 0.93  |
| VERHAAC_AML_WITH_NPM1_MUTATED_UP                   | 166 | 0.39633456 | 1.7639775 | 0 | 0.01169132 | 0.936 |
| NIKOLSKY_BREAST_CANCER_11Q12_Q14_AMPLICON          | 129 | 0.40658054 | 1.7640764 | 0 | 0.01171252 | 0.936 |
| MIKKELSEN_NPC_HCP_WITH_H3K27ME3                    | 300 | 0.36178172 | 1.7611626 | 0 | 0.01197706 | 0.942 |
| STAMBOLSKY_RESPONSE_TO_VITAMIN_D3_UP               | 71  | 0.46000186 | 1.758883  | 0 | 0.01216765 | 0.945 |
| BOQUEST_STEM_CELL_CULTURED_VS_FRESH_UP             | 392 | 0.3545896  | 1.7590287 | 0 | 0.01218978 | 0.945 |
| FOSTER_TOLERANT_MACROPHAGE_UP                      | 141 | 0.3992228  | 1.7568448 | 0 | 0.01230138 | 0.946 |
| FUJII_YBX1_TARGETS_UP                              | 41  | 0.49437985 | 1.7547246 | 0 | 0.01247678 | 0.948 |
| BLUM_RESPONSE_TO_SALIRASIB_UP                      | 228 | 0.36681968 | 1.7456608 | 0 | 0.01338591 | 0.959 |
| CROONQUIST_NRAS_SIGNALING_UP                       | 33  | 0.511055   | 1.7448688 | 0 | 0.01343195 | 0.961 |
| COULOUARN_TEMPORAL_TGFB1_SIGNATURE_UP              | 99  | 0.42298663 | 1.7450314 | 0 | 0.01343566 | 0.96  |
| KATSANOUE_ELAVL1_TARGETS_UP                        | 146 | 0.39678466 | 1.744048  | 0 | 0.01355574 | 0.963 |
| LABBE_TGFB1_TARGETS_UP                             | 94  | 0.42070785 | 1.7429324 | 0 | 0.01361878 | 0.965 |
| DAZARD_RESPONSE_TO_UV_NHEK_UP                      | 206 | 0.37751952 | 1.7412353 | 0 | 0.01381942 | 0.966 |
| VERHAAC_AML_WITH_NPM1_MUTATED_DN                   | 227 | 0.3701422  | 1.7364086 | 0 | 0.01420399 | 0.968 |
| PEDRIOLI_MIR31_TARGETS_DN                          | 352 | 0.3526977  | 1.7364798 | 0 | 0.01422988 | 0.968 |
| HEIDENBLAD_AMPLICON_8Q24_DN                        | 40  | 0.50047874 | 1.7349606 | 0 | 0.01432732 | 0.97  |
| DIAZ_CHRONIC_MEYLOGENOUS_LEUKEMIA_DN               | 107 | 0.408336   | 1.7339389 | 0 | 0.01443986 | 0.97  |
| NING_CHRONIC_OBSTRUCTIVE_PULMONARY_DISEASE_DN      | 112 | 0.400728   | 1.7341111 | 0 | 0.01446203 | 0.97  |
| SENESE_HDAC3_TARGETS_UP                            | 439 | 0.34426832 | 1.7336063 | 0 | 0.01446621 | 0.971 |
| MEISSNER_NPC_HCP_WITH_H3K4ME2_AND_H3K27ME3         | 303 | 0.35739788 | 1.732079  | 0 | 0.01464909 | 0.973 |
| ZHONG_SECRETOME_OF_LUNG_CANCER_AND_MACROPHAGE      | 72  | 0.4355154  | 1.7298415 | 0 | 0.01482015 | 0.98  |
| RUTELLA_RESPONSE_TO_HGF_DN                         | 204 | 0.36987013 | 1.7304387 | 0 | 0.01482108 | 0.978 |
| MEISSNER_NPC_HCP_WITH_H3_UNMETHYLATED              | 452 | 0.34448442 | 1.7262833 | 0 | 0.01524366 | 0.982 |
| ICHIBA_GRAFT_VERSUS_HOST_DISEASE_35D_UP            | 113 | 0.40540412 | 1.7200017 | 0 | 0.01596978 | 0.989 |
| ACOSTA_PROLIFERATION_INDEPENDENT_MYC_TARGETS_DN    | 100 | 0.40801206 | 1.7192624 | 0 | 0.01599069 | 0.989 |
| GU_PDEF_TARGETS_UP                                 | 70  | 0.43358868 | 1.7183176 | 0 | 0.016072   | 0.99  |
| BURTON_ADIPOGENESIS_2                              | 62  | 0.44795623 | 1.7173594 | 0 | 0.01612157 | 0.991 |
| LEE_AGING_NEOCORTEX_UP                             | 84  | 0.42493168 | 1.7176206 | 0 | 0.01612398 | 0.99  |
| WAMUNYOKOLI_OVARIAN_CANCER_LMP_UP                  | 229 | 0.36673793 | 1.715005  | 0 | 0.01652337 | 0.991 |
| NATSUME_RESPONSE_TO_INTERFERON_BETA_DN             | 46  | 0.47251445 | 1.7099653 | 0 | 0.0172904  | 0.993 |
| SENESE_HDAC1_AND_HDAC2_TARGETS_UP                  | 217 | 0.36374527 | 1.7079241 | 0 | 0.01744516 | 0.993 |
| CASORELLI_ACUTE_PROMYELOCYTIC_LEUKEMIA_UP          | 149 | 0.3914873  | 1.7071441 | 0 | 0.01752673 | 0.993 |
| WIELAND_UP_BY_HBV_INFECTION                        | 89  | 0.41870457 | 1.7060616 | 0 | 0.01762449 | 0.993 |
| QI_HYPOXIA                                         | 123 | 0.39303768 | 1.7061123 | 0 | 0.0176479  | 0.993 |
| SWEET_KRAS_TARGETS_DN                              | 58  | 0.44878495 | 1.7030373 | 0 | 0.01795222 | 0.993 |
| HESS_TARGETS_OF_HOXA9_AND_MEIS1_DN                 | 70  | 0.43701994 | 1.7031087 | 0 | 0.01798405 | 0.993 |
| SUNG_METASTASIS_STROMA_UP                          | 98  | 0.40948343 | 1.7026013 | 0 | 0.01799048 | 0.993 |
| KUMAR_TARGETS_OF_MLL_AF9_FUSION                    | 361 | 0.3411685  | 1.702023  | 0 | 0.0180222  | 0.993 |
| ZHONG_SECRETOME_OF_LUNG_CANCER_AND_FIBROBLAST      | 121 | 0.39000908 | 1.7008383 | 0 | 0.01821489 | 0.993 |
| ZHU_CMV_ALL_UP                                     | 109 | 0.40461668 | 1.6991824 | 0 | 0.01831944 | 0.993 |
| GERY_CEBP_TARGETS                                  | 113 | 0.39903197 | 1.6961608 | 0 | 0.01863526 | 0.994 |
| KONDO_EZH2_TARGETS                                 | 207 | 0.3684483  | 1.6962242 | 0 | 0.01866764 | 0.994 |
| LENAOUR_DENDRITIC_CELL_MATURATION_DN               | 124 | 0.3878657  | 1.6933943 | 0 | 0.01896456 | 0.994 |
| GHANDHI_DIRECT_IRRADIATION_UP                      | 94  | 0.41242734 | 1.6918293 | 0 | 0.01912854 | 0.994 |
| MIKKELSEN_MCV6_ICP_WITH_H3K27ME3                   | 65  | 0.4374177  | 1.6910982 | 0 | 0.019228   | 0.994 |
| MIKKELSEN_ES_ICP_WITH_H3K4ME3_AND_H3K27ME3         | 122 | 0.38881496 | 1.6889384 | 0 | 0.01949886 | 0.995 |
| TORCHIA_TARGETS_OF_EWSR1_FLI1_FUSION_UP            | 241 | 0.35678765 | 1.6873436 | 0 | 0.01975085 | 0.996 |

|                                                            |     |            |           |   |            |       |
|------------------------------------------------------------|-----|------------|-----------|---|------------|-------|
| ENK_UV_RESPONSE_EPIDERMIS_DN                               | 469 | 0.33589035 | 1.6840824 | 0 | 0.02022261 | 0.996 |
| MARKEY_RB1_CHRONIC_LOF_DN                                  | 108 | 0.40186167 | 1.6812087 | 0 | 0.02054934 | 0.996 |
| MIYAGAWA_TARGETS_OF_EWSR1_ETS_FUSIONS_UP                   | 226 | 0.3556381  | 1.6741192 | 0 | 0.02164413 | 0.998 |
| TAKEDA_TARGETS_OF_NUP98_HOXA9_FUSION_8D_DN                 | 187 | 0.3616213  | 1.67432   | 0 | 0.02169793 | 0.997 |
| DURCHDEWALD_SKIN_CARCIANOGENESIS_DN                        | 245 | 0.35379696 | 1.6720101 | 0 | 0.02197555 | 0.998 |
| VART_KSHV_INFECTION_ANGIOGENIC_MARKERS_UP                  | 151 | 0.3710514  | 1.6712725 | 0 | 0.02202626 | 0.998 |
| PICCALUGA_ANGIOIMMUNOBLASTIC_LYMPHOMA_DN                   | 120 | 0.39231434 | 1.671282  | 0 | 0.02206731 | 0.998 |
| HOELZEL_NF1_TARGETS_UP                                     | 126 | 0.383458   | 1.6693604 | 0 | 0.02236973 | 0.998 |
| SCHUETZ_BREAST_CANCER_DUCTAL_INVASIVE_UP                   | 320 | 0.3400888  | 1.6672173 | 0 | 0.02272532 | 0.998 |
| PECE_MAMMARY_STEM_CELL_DN                                  | 120 | 0.38736615 | 1.6623807 | 0 | 0.02347607 | 0.999 |
| KIM_WT1_TARGETS_8HR_UP                                     | 152 | 0.37567356 | 1.6621234 | 0 | 0.02347609 | 0.999 |
| LENAOUR_DENDRITIC_CELL_MATURATION_UP                       | 105 | 0.390471   | 1.6610556 | 0 | 0.02353573 | 0.999 |
| ACEVEDO_FGFR1_TARGETS_IN_PROSTATE_CANCER_MODEL_UP          | 263 | 0.3457843  | 1.6587327 | 0 | 0.02382754 | 0.999 |
| HAN_SATB1_TARGETS_UP                                       | 340 | 0.33585453 | 1.6581388 | 0 | 0.02391064 | 0.999 |
| DEBIASI_APOPTOSIS_BY_REOVIRUS_INFECTION_UP                 | 277 | 0.3422986  | 1.6553946 | 0 | 0.02422382 | 0.999 |
| RUTELLA_RESPONSE_TO_HGF_UP                                 | 382 | 0.33192307 | 1.6554034 | 0 | 0.02426701 | 0.999 |
| RICKMAN_HEAD_AND_NECK_CANCER_E                             | 79  | 0.40668184 | 1.6445243 | 0 | 0.02590236 | 1     |
| GAUSSMANN_MLL_AF4_FUSION_TARGETS_E_UP                      | 87  | 0.39751437 | 1.6439378 | 0 | 0.02597861 | 1     |
| RUAN_RESPONSE_TO_TNF_DN                                    | 80  | 0.4042631  | 1.6402824 | 0 | 0.02650894 | 1     |
| CHIANG_LIVER_CANCER_SUBCLASS_CTNNB1_DN                     | 158 | 0.36362544 | 1.639457  | 0 | 0.02659475 | 1     |
| RHEIN_ALL_GLUCCORTICOID_THERAPY_UP                         | 72  | 0.41563064 | 1.6394606 | 0 | 0.0266441  | 1     |
| PEDERSEN_METASTASIS_BY_ERBB2_ISOFORM_4                     | 97  | 0.38772923 | 1.6382998 | 0 | 0.02677    | 1     |
| ZHONG_RESPONSE_TO_AZACITIDINE_AND_TSA_UP                   | 162 | 0.3619389  | 1.6371353 | 0 | 0.02703486 | 1     |
| MOREAUX_B_LYMPHOCYTE_MATURATION_BY_TACI_UP                 | 74  | 0.40950876 | 1.6349344 | 0 | 0.02726741 | 1     |
| JIANG_HYPOXIA_NORMAL                                       | 270 | 0.3389636  | 1.6306338 | 0 | 0.02805112 | 1     |
| BROWNE_HCMV_INFECTION_6HR_UP                               | 64  | 0.4221425  | 1.6299689 | 0 | 0.02812063 | 1     |
| CERVERA_SDHB_TARGETS_2                                     | 101 | 0.39036307 | 1.627389  | 0 | 0.02851321 | 1     |
| ZHU_CMV_ALL_DN                                             | 123 | 0.3782635  | 1.6259552 | 0 | 0.02877075 | 1     |
| GRAESSMANN_APOPTOSIS_BY_SERUM_DEPRIVATION_UP               | 475 | 0.3203645  | 1.6244421 | 0 | 0.02910822 | 1     |
| ZWANG_EGF_INTERVAL_DN                                      | 177 | 0.35575894 | 1.6204423 | 0 | 0.02986994 | 1     |
| SHAFFER_IRF4_TARGETS_IN_PLASMA_CELL_VS_MATURE_B_LYMPHOCYTE | 63  | 0.42187196 | 1.6206051 | 0 | 0.02990989 | 1     |
| YAO_HOXA10_TARGETS_VIA_PROGESTERONE_UP                     | 67  | 0.4087277  | 1.6199063 | 0 | 0.02994358 | 1     |
| SCHAEFFER_PROSTATE_DEVELOPMENT_48HR_UP                     | 433 | 0.32402295 | 1.616494  | 0 | 0.03052244 | 1     |
| ZHOU_TNF_SIGNALING_4HR                                     | 51  | 0.4421735  | 1.6124684 | 0 | 0.03146386 | 1     |
| RAY_TUMORIGENESIS_BY_ERBB2_CDC25A_DN                       | 142 | 0.36350578 | 1.6070702 | 0 | 0.03247906 | 1     |
| FULCHER_INFLAMMATORY_RESPONSE_LECTIN_VS_LPS_UP             | 496 | 0.31215858 | 1.6072798 | 0 | 0.03248172 | 1     |
| GERHOLD_ADIPOGENESIS_DN                                    | 59  | 0.4159782  | 1.6074452 | 0 | 0.03250581 | 1     |
| GRUETZMANN_PANCREATIC_CANCER_UP                            | 332 | 0.32664305 | 1.6061885 | 0 | 0.0325524  | 1     |
| HUTTMANN_B_CLL_POOR_SURVIVAL_UP                            | 239 | 0.33638784 | 1.6062702 | 0 | 0.03257632 | 1     |
| LINDVALL_IMMORTALIZED_BY_TERT_DN                           | 66  | 0.40155032 | 1.6005034 | 0 | 0.03359279 | 1     |
| SENESE_HDAC1_AND_HDAC2_TARGETS_DN                          | 199 | 0.3492454  | 1.6009575 | 0 | 0.03366973 | 1     |
| TONKS_TARGETS_OF_RUNX1_RUNX1T1_FUSION_MONOCYTE_UP          | 180 | 0.34800458 | 1.597334  | 0 | 0.03392399 | 1     |
| CAIRO_HEPATOBLASTOMA_CLASSES_DN                            | 196 | 0.34864664 | 1.5915315 | 0 | 0.03504435 | 1     |
| KAYO_CALORIE_RESTRICTION_MUSCLE_UP                         | 88  | 0.3903771  | 1.5893768 | 0 | 0.03545127 | 1     |
| ENK_UV_RESPONSE_EPIDERMIS_UP                               | 262 | 0.33350816 | 1.5888791 | 0 | 0.03552435 | 1     |
| MEISSNER_NPC_HCP_WITH_H3K4ME2                              | 429 | 0.31829154 | 1.5839423 | 0 | 0.03646073 | 1     |
| LIU_PROSTATE_CANCER_DN                                     | 424 | 0.3148048  | 1.5827706 | 0 | 0.03677563 | 1     |
| LIM_MAMMARY_STEM_CELL_UP                                   | 435 | 0.31501776 | 1.5800158 | 0 | 0.037309   | 1     |
| MIKKELSEN_MEF_LCP_WITH_H3K4ME3                             | 105 | 0.37916324 | 1.5789398 | 0 | 0.03748539 | 1     |
| SENGUPTA_NASOPHARYNGEAL_CARCINOMA_DN                       | 270 | 0.3327119  | 1.5783398 | 0 | 0.03761594 | 1     |
| TAKEDA_TARGETS_OF_NUP98_HOXA9_FUSION_16D_DN                | 122 | 0.36636618 | 1.5748862 | 0 | 0.03831507 | 1     |
| TONKS_TARGETS_OF_RUNX1_RUNX1T1_FUSION_HSC_DN               | 170 | 0.34748602 | 1.5710132 | 0 | 0.03925678 | 1     |
| SANSOM_APC_TARGETS_DN                                      | 329 | 0.3173438  | 1.5666888 | 0 | 0.04027872 | 1     |
| BERENJENO_TRANSFORMED_BY_RHOA_DN                           | 354 | 0.3176327  | 1.5643985 | 0 | 0.04089133 | 1     |
| QI_PLASMACYTOMA_UP                                         | 242 | 0.3284234  | 1.5633827 | 0 | 0.04117962 | 1     |
| PEREZ_TP63_TARGETS                                         | 303 | 0.32296106 | 1.5618926 | 0 | 0.04164497 | 1     |
| ZHOU_INFLAMMATORY_RESPONSE_LIVE_UP                         | 403 | 0.31484926 | 1.5603534 | 0 | 0.04214526 | 1     |
| FOSTER_KDM1A_TARGETS_UP                                    | 236 | 0.32885975 | 1.5574085 | 0 | 0.04274475 | 1     |
| NING_CHRONIC_OBSTRUCTIVE_PULMONARY_DISEASE_UP              | 139 | 0.3574384  | 1.5571095 | 0 | 0.04278547 | 1     |
| RUTELLA_RESPONSE_TO_CSF2RB_AND_IL4_UP                      | 307 | 0.3195202  | 1.5559142 | 0 | 0.0430443  | 1     |
| LINDGREN_BLADDER_CANCER_CLUSTER_2B                         | 345 | 0.31662372 | 1.5549818 | 0 | 0.04322128 | 1     |
| LEE_NEURAL_CRESCENT_STEM_CELL_UP                           | 135 | 0.3539775  | 1.5532125 | 0 | 0.04364141 | 1     |
| LI_WILMS_TUMOR_VS_FETAL_KIDNEY_1_UP                        | 168 | 0.34608632 | 1.5514624 | 0 | 0.04413613 | 1     |
| BROWNE_HCMV_INFECTION_18HR_DN                              | 161 | 0.34564328 | 1.5472512 | 0 | 0.04514827 | 1     |
| GARY_CD5_TARGETS_UP                                        | 424 | 0.30382353 | 1.5394648 | 0 | 0.04721205 | 1     |
| KOYAMA_SEMA3B_TARGETS_UP                                   | 238 | 0.32435322 | 1.5369538 | 0 | 0.04770203 | 1     |
| ZHOU_INFLAMMATORY_RESPONSE_FIMA_UP                         | 439 | 0.30264053 | 1.5327146 | 0 | 0.04889934 | 1     |
| MITSIANES_RESPONSE_TO_APLIDIN_UP                           | 380 | 0.30802134 | 1.5319983 | 0 | 0.04906492 | 1     |
| UEDA_PERIPHERAL_CLOCK                                      | 156 | 0.34465712 | 1.522136  | 0 | 0.05214192 | 1     |
| ZHU_CMV_24_HR_DN                                           | 87  | 0.36707145 | 1.5194191 | 0 | 0.05255199 | 1     |
| FOSTER_TOLERANT_MACROPHAGE_DN                              | 375 | 0.30604082 | 1.5030909 | 0 | 0.05753301 | 1     |
| SHEDDEN_LUNG_CANCER_GOOD_SURVIVAL_A12                      | 258 | 0.31710315 | 1.4974717 | 0 | 0.05959015 | 1     |
| SENESE_HDAC1_TARGETS_DN                                    | 208 | 0.32563844 | 1.4972663 | 0 | 0.05959025 | 1     |
| RUTELLA_RESPONSE_TO_HGF_VS_CSF2RB_AND_IL4_DN               | 217 | 0.31705254 | 1.4966736 | 0 | 0.05977111 | 1     |
| DURAND_STROMA_MAX_UP                                       | 269 | 0.3133287  | 1.495736  | 0 | 0.06002541 | 1     |
| MIYAGAWA_TARGETS_OF_EWSR1_ETS_FUSIONS_DN                   | 200 | 0.32162693 | 1.4946029 | 0 | 0.06038577 | 1     |
| JAATINEN_HEMATOPOIETIC_STEM_CELL_DN                        | 202 | 0.32081395 | 1.4915559 | 0 | 0.06113517 | 1     |
| LIM_MAMMARY_STEM_CELL_DN                                   | 377 | 0.29909787 | 1.489268  | 0 | 0.06193389 | 1     |
| MILI_PSEUDOPODIA_CHEMOTAXIS_DN                             | 421 | 0.29971227 | 1.4852859 | 0 | 0.06353755 | 1     |

|                                                      |     |            |           |            |            |       |
|------------------------------------------------------|-----|------------|-----------|------------|------------|-------|
| KRIEG_KDM3A_TARGETS_NOT_HYPOXIA                      | 155 | 0.3326714  | 1.4840941 | 0          | 0.06403522 | 1     |
| MOREAUX_MULTIPLE_MYELOMA_BY_TACI_UP                  | 358 | 0.30109495 | 1.4804544 | 0          | 0.06529552 | 1     |
| OSWALD_HEMATOPOIETIC_STEM_CELL_IN_COLLAGEN_GEL_UP    | 216 | 0.31453362 | 1.4732555 | 0          | 0.06803384 | 1     |
| CAIRO_LIVER_DEVELOPMENT_DN                           | 211 | 0.31968856 | 1.4692752 | 0          | 0.06959318 | 1     |
| DOUGLAS_BMI1_TARGETS_DN                              | 282 | 0.30509117 | 1.4583634 | 0          | 0.07349034 | 1     |
| HELLER_HDAC_TARGETS_SILENCED_BY_METHYLATION_UP       | 398 | 0.2913915  | 1.4468652 | 0          | 0.07834723 | 1     |
| HELLER_HDAC_TARGETS_UP                               | 269 | 0.2934797  | 1.4105806 | 0          | 0.09463813 | 1     |
| BRUINS_UVC_RESPONSE_VIA_TP53_GROUP_B                 | 477 | 0.27393216 | 1.397331  | 0          | 0.10035459 | 1     |
| CHYLA_CBFA2T3_TARGETS_UP                             | 335 | 0.27930957 | 1.3823569 | 0          | 0.10936227 | 1     |
| SMID_BREAST_CANCER_NORMAL_LIKE_UP                    | 416 | 0.26890048 | 1.3534995 | 0          | 0.12531014 | 1     |
| MARTINEZ_RB1_TARGETS_DN                              | 486 | 0.26011539 | 1.3044708 | 0          | 0.15826248 | 1     |
| BROWNE_HCMV_INFECTION_48HR_DN                        | 457 | 0.25483757 | 1.2833189 | 0          | 0.17489946 | 1     |
| RASHI_NFKB1_TARGETS                                  | 17  | 0.6961831  | 1.9806641 | 0.00210526 | 0.00154965 | 0.172 |
| LEE_LIVER_CANCER_HEPATOBlast                         | 16  | 0.68868965 | 1.9332163 | 0.00210526 | 0.00257475 | 0.313 |
| XU_RESPONSE_TO_TRETINOIN_AND_NSC682994_UP            | 16  | 0.6808944  | 1.920886  | 0.0021645  | 0.00297513 | 0.377 |
| GILDEA_METASTASIS                                    | 26  | 0.58170795 | 1.8382398 | 0.00218818 | 0.00636725 | 0.71  |
| VARELA_ZMPSTE24_TARGETS_UP                           | 33  | 0.57636666 | 1.912627  | 0.00220264 | 0.00311904 | 0.402 |
| ZIRN_TRETINOIN_RESPONSE_WT1_UP                       | 21  | 0.57083845 | 1.7054311 | 0.00220264 | 0.01768261 | 0.993 |
| HERNANDEZ_ABERRANT_MITOSIS_BY_DOCETACEL_4NM_UP       | 21  | 0.654663   | 1.9311928 | 0.00224215 | 0.00259175 | 0.32  |
| DORN_ADENOVIRUS_INFECTION_12HR_UP                    | 27  | 0.6045822  | 1.9329932 | 0.00224719 | 0.00256782 | 0.314 |
| SEITZ_NEOPLASTIC_TRANSFORMATION_BY_8P_DELETION_DN    | 30  | 0.548792   | 1.7926699 | 0.00225734 | 0.00908712 | 0.857 |
| ROZANOV_MMP14_TARGETS_SUBSET                         | 32  | 0.5461749  | 1.847512  | 0.00226244 | 0.00586204 | 0.681 |
| KANG_CISPLATIN_RESISTANCE_UP                         | 16  | 0.64877445 | 1.8354868 | 0.0022779  | 0.00651233 | 0.72  |
| DAZARD_UV_RESPONSE_CLUSTER_G24                       | 23  | 0.6048751  | 1.9272552 | 0.00229358 | 0.00270485 | 0.34  |
| VALK_AML_CLUSTER_11                                  | 35  | 0.53942955 | 1.8502122 | 0.00229885 | 0.00566767 | 0.667 |
| NOJIMA_SFRP2_TARGETS_UP                              | 28  | 0.5842745  | 1.8630873 | 0.00230947 | 0.00500377 | 0.612 |
| LUI_THYROID_CANCER_PAX8_PPARG_DN                     | 40  | 0.4946696  | 1.7219132 | 0.00231482 | 0.01577026 | 0.986 |
| GENTILE_UV_HIGH_DOSE_UP                              | 21  | 0.6251432  | 1.8792564 | 0.00233645 | 0.00444204 | 0.544 |
| LUI_TARGETS_OF_PAX8_PPARG_FUSION                     | 28  | 0.55019534 | 1.7469866 | 0.00233645 | 0.01328535 | 0.959 |
| HAHTOLA_MYCOSIS_FUNGOIDES_UP                         | 17  | 0.6551306  | 1.8309897 | 0.00234192 | 0.00672315 | 0.734 |
| NAKAMURA_ADIPOGENESIS_LATE_DN                        | 35  | 0.51603884 | 1.7623324 | 0.00234742 | 0.01183007 | 0.941 |
| DELACROIX_RAR_TARGETS_UP                             | 42  | 0.53896856 | 1.9721514 | 0.00235849 | 0.00165712 | 0.191 |
| UZONYI_RESPONSE_TO_LEUKOTRIENE_AND_THROMBIN          | 33  | 0.54128873 | 1.8194107 | 0.00235849 | 0.00733131 | 0.784 |
| CHO_NR4A1_TARGETS                                    | 31  | 0.5352316  | 1.7412325 | 0.0023753  | 0.0137862  | 0.966 |
| HUI_MAPK14_TARGETS_UP                                | 19  | 0.58450085 | 1.6828735 | 0.0023753  | 0.02038493 | 0.996 |
| WANG_TNF_TARGETS                                     | 23  | 0.5938958  | 1.8388987 | 0.00239234 | 0.00636471 | 0.707 |
| KASLER_HDAC7_TARGETS_2_DN                            | 30  | 0.5793943  | 1.8885745 | 0.00239808 | 0.00402243 | 0.502 |
| FARDIN_HYPOXIA_11                                    | 26  | 0.5894049  | 1.8681917 | 0.00241546 | 0.00486792 | 0.597 |
| DOANE_BREAST_CANCER_ESR1_DN                          | 46  | 0.45957994 | 1.6751448 | 0.00243309 | 0.02168146 | 0.997 |
| MCDOWELL_ACUTE_LUNG_INJURY_UP                        | 43  | 0.48378113 | 1.7281326 | 0.00245098 | 0.01500677 | 0.981 |
| BOYALT_LIVER_CANCER_SUBCLASS_G56_DN                  | 16  | 0.6044683  | 1.7033436 | 0.00245098 | 0.01799316 | 0.993 |
| VALK_AML_CLUSTER_9                                   | 34  | 0.56344706 | 1.8926257 | 0.002457   | 0.00387067 | 0.488 |
| COLIN_PILOCYTIC_ASTROCYTOMA_VS_GLIOMASTOMA_DN        | 27  | 0.5570669  | 1.7812874 | 0.002457   | 0.01012049 | 0.895 |
| ZHU_CMV_8_HR_DN                                      | 51  | 0.46101633 | 1.6860988 | 0.00248139 | 0.01989729 | 0.996 |
| KANG_GIST_WITH_PDGFRB_UP                             | 48  | 0.4710455  | 1.6659584 | 0.00248139 | 0.02289893 | 0.998 |
| DIRMEIER_LMP1_RESPONSE_LATE_DN                       | 30  | 0.51557565 | 1.7206028 | 0.00248756 | 0.01592456 | 0.987 |
| MEISSNER_BRAIN_HCP_WITH_H3K4ME2_AND_H3K27ME3         | 54  | 0.44986206 | 1.6617942 | 0.00248756 | 0.02343747 | 0.999 |
| SESTO_RESPONSE_TO_UV_C2                              | 49  | 0.4734863  | 1.7482984 | 0.00250627 | 0.01318875 | 0.956 |
| HERNANDEZ_MITOTIC_ARREST_BY_DOCETAXEL_2_UP           | 56  | 0.44519353 | 1.6965688 | 0.00250627 | 0.01867082 | 0.994 |
| GEORGANTAS_HSC_MARKERS                               | 61  | 0.43038425 | 1.645132  | 0.00253165 | 0.02582572 | 0.999 |
| AMIT_EGF_RESPONSE_120_MCF10A                         | 35  | 0.48625267 | 1.6283728 | 0.00253807 | 0.02833679 | 1     |
| WANG_METHYLATED_IN_BREAST_CANCER                     | 35  | 0.5042112  | 1.7270414 | 0.00254453 | 0.01514537 | 0.981 |
| RAGHAVACHARI_PLATELET_SPECIFIC_GENES                 | 67  | 0.4155925  | 1.6355697 | 0.00254453 | 0.02728648 | 1     |
| CROMER_METASTASIS_DN                                 | 72  | 0.43939114 | 1.7438474 | 0.00255755 | 0.01353934 | 0.963 |
| LEE_LIVER_CANCER_CIPROFIBRATE_UP                     | 54  | 0.46185583 | 1.7379586 | 0.00255755 | 0.01406472 | 0.968 |
| HALMOS_CEBPA_TARGETS_DN                              | 43  | 0.49917626 | 1.8029557 | 0.00260417 | 0.00836465 | 0.834 |
| ZHAN_MULTIPLE_MYELOMA_CD1_VS_CD2_DN                  | 49  | 0.4718516  | 1.7382352 | 0.00260417 | 0.01403335 | 0.968 |
| YAO_TEMPORAL_RESPONSE_TO_PROGESTERONE_CLUSTER_0      | 64  | 0.46325883 | 1.7933251 | 0.00261097 | 0.00904727 | 0.854 |
| KRIEG_HYPOXIA_VIA_KDM3A                              | 47  | 0.4920876  | 1.7950591 | 0.00262467 | 0.00889275 | 0.851 |
| ZHENG_IL22_SIGNALING_UP                              | 49  | 0.4601948  | 1.6620378 | 0.00262467 | 0.02344669 | 0.999 |
| ZHENG_GLIOMASTOMA_PLASTICITY_DN                      | 54  | 0.43588656 | 1.6407257 | 0.00262467 | 0.02642133 | 1     |
| JI_RESPONSE_TO_FSH_UP                                | 66  | 0.40303507 | 1.5695239 | 0.00262467 | 0.03958058 | 1     |
| SMIRNOV_RESPONSE_TO_IR_2HR_UP                        | 46  | 0.49313045 | 1.7858372 | 0.00263158 | 0.00971951 | 0.88  |
| STEARMAN_TUMOR_FIELD_EFFECT_UP                       | 32  | 0.5057143  | 1.693882  | 0.00263852 | 0.01892922 | 0.994 |
| QUELLET_CULTURED_OVARIAN_CANCER_INVASIVE_VS_LMP_DN   | 30  | 0.5510112  | 1.8392304 | 0.00265252 | 0.0063829  | 0.707 |
| RICKMAN_TUMOR_DIFFERENTIATED_MODERATELY_VS_POORLY_UP | 102 | 0.37383044 | 1.5548549 | 0.00266667 | 0.04321241 | 1     |
| NAKAYAMA_FRA2_TARGETS                                | 41  | 0.51432425 | 1.8203808 | 0.00268097 | 0.00732126 | 0.781 |
| KUNINGER_IGF1_VS_PDGFRB_TARGETS_UP                   | 76  | 0.4195396  | 1.6518294 | 0.00268097 | 0.02466014 | 0.999 |
| ZHU_CMV_24_HR_UP                                     | 84  | 0.4201531  | 1.6949698 | 0.0027027  | 0.0187822  | 0.994 |
| BURTON_ADIPOGENESIS_9                                | 85  | 0.40129122 | 1.6307496 | 0.00271739 | 0.02810938 | 1     |
| MORI_LARGE_PRE_BII_LYMPHOCYTE_DN                     | 53  | 0.4813785  | 1.8033739 | 0.00273224 | 0.00839675 | 0.834 |
| DELASERNA_MYOD_TARGETS_UP                            | 85  | 0.39395538 | 1.5940068 | 0.00273224 | 0.03453025 | 1     |
| SCHUETZ_BREAST_CANCER_DUCTAL_INVASIVE_DN             | 80  | 0.4054865  | 1.6607764 | 0.00273973 | 0.02355956 | 0.999 |
| LINDSTEDT_DENDRITIC_CELL_MATURATION_B                | 48  | 0.49048817 | 1.7718937 | 0.00274725 | 0.01096764 | 0.915 |
| KIM_GLI2_TARGETS_UP                                  | 80  | 0.40157315 | 1.6306696 | 0.00276243 | 0.02809254 | 1     |
| MIKKELSEN_MEF_LCP_WITH_H3K27ME3                      | 56  | 0.43635285 | 1.6646    | 0.0027933  | 0.02311044 | 0.999 |
| NGUYEN_NOTCH1_TARGETS_DN                             | 82  | 0.37502337 | 1.5285156 | 0.00280112 | 0.05011533 | 1     |
| LIEN_BREAST_CARCINOMA_METAPLASTIC_VS_DUCTAL_UP       | 79  | 0.40459284 | 1.5985719 | 0.0028169  | 0.03367865 | 1     |
| BHAT_ESR1_TARGETS_NOT_VIA_AKT1_DN                    | 80  | 0.4485892  | 1.7896016 | 0.00287356 | 0.00935553 | 0.872 |

|                                                    |     |            |           |            |            |       |
|----------------------------------------------------|-----|------------|-----------|------------|------------|-------|
| MIKKELSEN_IPS_ICP_WITH_H3K4ME3_AND_H327ME3         | 111 | 0.4009055  | 1.7299445 | 0.00288184 | 0.01485058 | 0.98  |
| WANG_HCP_PROSTATE_CANCER                           | 102 | 0.4002188  | 1.675088  | 0.00290698 | 0.0216441  | 0.997 |
| HINATA_NFKB_TARGETS_FIBROBLAST_UP                  | 77  | 0.38010246 | 1.5213302 | 0.00291545 | 0.05223592 | 1     |
| MAHAJAN_RESPONSE_TO_IL1A_UP                        | 72  | 0.40294257 | 1.5895857 | 0.00292398 | 0.03546469 | 1     |
| SERVITJA_ISLET_HNF1A_TARGETS_UP                    | 153 | 0.3553789  | 1.598584  | 0.00293255 | 0.03373264 | 1     |
| LIM_MAMMARY_LUMINAL_MATURE_DN                      | 89  | 0.37810376 | 1.545219  | 0.00294985 | 0.04564249 | 1     |
| SAFFORD_T_LYMPHOCYTE_AENERGY                       | 84  | 0.38938767 | 1.5990137 | 0.00298508 | 0.03366126 | 1     |
| LABBE_TARGETS_OF_TGFB1_AND_WNT3A_UP                | 105 | 0.35910422 | 1.4933847 | 0.00299401 | 0.0606748  | 1     |
| RODRIGUES_DCC_TARGETS_DN                           | 114 | 0.3777801  | 1.6034492 | 0.00301205 | 0.03311787 | 1     |
| POTTI_TOPOTECAN_SENSITIVITY                        | 119 | 0.35737535 | 1.5433459 | 0.00301205 | 0.04620435 | 1     |
| NIKOLSKY_BREAST_CANCER_20Q12_Q13_AMPLICON          | 118 | 0.33949992 | 1.4571301 | 0.00301205 | 0.07384767 | 1     |
| LIM_MAMMARY_LUMINAL_MATURE_UP                      | 98  | 0.3931625  | 1.6354399 | 0.00304878 | 0.0272083  | 1     |
| KAN_RESPONSE_TO_ARSENIC_TRIOXIDE                   | 116 | 0.34963968 | 1.5152699 | 0.00311527 | 0.05376092 | 1     |
| IGLESIAS_E2F_TARGETS_UP                            | 138 | 0.31911263 | 1.4123497 | 0.00320513 | 0.09379222 | 1     |
| SMIRNOV_RESPONSE_TO_IR_6HR_UP                      | 140 | 0.33591095 | 1.5049561 | 0.00321543 | 0.05703208 | 1     |
| PICCALUGA_ANGIOIMMUNOBLASTIC_LYMPHOMA_UP           | 189 | 0.31618768 | 1.4515693 | 0.00324675 | 0.07642504 | 1     |
| LANDIS_ERBB2_BREAST_TUMORS_324_DN                  | 138 | 0.32164887 | 1.4030002 | 0.00327869 | 0.09805448 | 1     |
| DAVICIONI_MOLECULAR_ARMS_VS_ERMS_DN                | 165 | 0.32951403 | 1.4736099 | 0.00333333 | 0.06797765 | 1     |
| PEREZ_TP53_AND_TP63_TARGETS                        | 174 | 0.32028815 | 1.4474791 | 0.003367   | 0.07813169 | 1     |
| MIKKELSEN_MEF_ICP_WITH_H3K27ME3                    | 174 | 0.37828368 | 1.7071102 | 0.00350877 | 0.01748821 | 0.993 |
| WANG_CISPLATIN_RESPONSE_AND_XPC_DN                 | 202 | 0.31263927 | 1.4414183 | 0.00350877 | 0.08022767 | 1     |
| SHEDDEN_LUNG_CANCER_GOOD_SURVIVAL_A4               | 179 | 0.31002155 | 1.4173276 | 0.00362319 | 0.09134724 | 1     |
| BARRIER_COLON_CANCER_RECURRENCE_DN                 | 17  | 0.66327506 | 1.8729761 | 0.00440529 | 0.00472761 | 0.571 |
| CREIGHTON_AKT1_SIGNALING_VIA_MTOR_DN               | 19  | 0.6362766  | 1.8692154 | 0.00444445 | 0.0048369  | 0.592 |
| SENESE_HDAC1_TARGETS_UP                            | 404 | 0.2489118  | 1.2609209 | 0.00444445 | 0.1918957  | 1     |
| OZEN_MIR125B1_TARGETS                              | 23  | 0.5918144  | 1.8248209 | 0.00446429 | 0.00706674 | 0.764 |
| BRACHAT_RESPONSE_TO_CAMPTOTHECIN_UP                | 25  | 0.5847952  | 1.8383234 | 0.00448431 | 0.00638133 | 0.71  |
| AKL_HTLV1_INFECTON_UP                              | 19  | 0.6264054  | 1.8199601 | 0.00451467 | 0.00729827 | 0.782 |
| SHI_SPARC_TARGETS_UP                               | 19  | 0.5981049  | 1.7196089 | 0.00454545 | 0.01596489 | 0.989 |
| MISHRA_CARCINOMA_ASSOCIATED_FIBROBLAST_DN          | 22  | 0.5899895  | 1.8377106 | 0.00456621 | 0.00636868 | 0.711 |
| VILIMAS_NOTCH1_TARGETS_DN                          | 18  | 0.6407629  | 1.8139174 | 0.00456621 | 0.00774607 | 0.795 |
| GOLUB_ALL_VS_AML_DN                                | 22  | 0.60122377 | 1.817071  | 0.0045977  | 0.00750976 | 0.79  |
| ZHU_SKIL_TARGETS_UP                                | 19  | 0.59543973 | 1.7744222 | 0.0046083  | 0.01071619 | 0.909 |
| JOSEPH_RESPONSE_TO_SODIUM_BUTYRATE_UP              | 25  | 0.5495296  | 1.6981953 | 0.00465116 | 0.01844422 | 0.993 |
| JEON_SMAD6_TARGETS_UP                              | 21  | 0.6175724  | 1.8224543 | 0.00466201 | 0.00714942 | 0.77  |
| FARMER_BREAST_CANCER_CLUSTER_4                     | 16  | 0.67266744 | 1.8573154 | 0.00470588 | 0.00529961 | 0.643 |
| MARTENS_BOUND_BY_PML_RARA_FUSION                   | 399 | 0.2642935  | 1.3163683 | 0.00471698 | 0.14921445 | 1     |
| MURAKAMI_UV_RESPONSE_6HR_UP                        | 33  | 0.52645147 | 1.7847131 | 0.00473934 | 0.00979814 | 0.883 |
| CHIBA_RESPONSE_TO_TSA                              | 41  | 0.5202109  | 1.8489072 | 0.00485437 | 0.00574599 | 0.674 |
| ABBUD_LIF_SIGNALING_1_UP                           | 40  | 0.48747486 | 1.7189301 | 0.00487805 | 0.01602046 | 0.99  |
| KANNAN_TP53_TARGETS_UP                             | 51  | 0.46311074 | 1.6962471 | 0.00487805 | 0.01870374 | 0.994 |
| CHEN_LVAD_SUPPORT_OF_FAILING_HEART_DN              | 40  | 0.4608049  | 1.6355573 | 0.00487805 | 0.02723641 | 1     |
| DORN_ADENOVIRUS_INFECTON_48HR_DN                   | 35  | 0.52016604 | 1.7766019 | 0.00488998 | 0.01055607 | 0.906 |
| CROMER_TUMORIGENESIS_DN                            | 49  | 0.45317146 | 1.6553882 | 0.0049505  | 0.02417732 | 0.999 |
| RUAN_RESPONSE_TO_TROGLITAZONE_UP                   | 23  | 0.5495427  | 1.6921587 | 0.00502513 | 0.01911118 | 0.994 |
| BEIER_GLIOMA_STEM_CELL_DN                          | 58  | 0.4228476  | 1.5977662 | 0.00508906 | 0.03385808 | 1     |
| TAVOR_CEBPA_TARGETS_UP                             | 44  | 0.4501134  | 1.6141248 | 0.00514139 | 0.0311094  | 1     |
| CHIANG_LIVER_CANCER_SUBCLASS_POLYSOMY7_UP          | 65  | 0.43757883 | 1.7005763 | 0.00522193 | 0.01819424 | 0.993 |
| LEIN_MEDULLA_MARKERS                               | 76  | 0.39241263 | 1.5503447 | 0.00526316 | 0.04432962 | 1     |
| GHANDHI_BYSTANDER_IRRADIATION_UP                   | 76  | 0.3965598  | 1.6006126 | 0.00530504 | 0.03362679 | 1     |
| AMIT_SERUM_RESPONSE_120_MCF10A                     | 56  | 0.45609117 | 1.7287209 | 0.00533333 | 0.01494685 | 0.981 |
| VANHARANTA_UTERINE_FIBROID_DN                      | 60  | 0.43297055 | 1.6633884 | 0.00534759 | 0.02332289 | 0.999 |
| JACKSON_DNMT1_TARGETS_UP                           | 74  | 0.40017152 | 1.5846316 | 0.00550964 | 0.03636537 | 1     |
| ZAMORA_NOS2_TARGETS_DN                             | 88  | 0.35081664 | 1.4299302 | 0.00554017 | 0.08525831 | 1     |
| HELLER_SILENCED_BY_METHYLATION_DN                  | 94  | 0.3952982  | 1.631672  | 0.00576369 | 0.0279343  | 1     |
| BERTUCCI_MEDULLARY_VS_DUCTAL_BREAST_CANCER_DN      | 145 | 0.34252474 | 1.498992  | 0.0060423  | 0.05893093 | 1     |
| SCHAEFFER_PROSTATE_DEVELOPMENT_12HR_UP             | 107 | 0.3732321  | 1.5688373 | 0.00630915 | 0.0397166  | 1     |
| KIM_WT1_TARGETS_12HR_DN                            | 181 | 0.29786736 | 1.3621173 | 0.00634921 | 0.11978679 | 1     |
| VART_KSHV_INFECTON_ANGIOGENIC_MARKERS_DN           | 127 | 0.3460804  | 1.5017219 | 0.00655738 | 0.05794688 | 1     |
| MARTORIATI_MDM4_TARGETS_FETAL_LIVER_UP             | 192 | 0.31701368 | 1.4560552 | 0.00657895 | 0.07428537 | 1     |
| LINDGREN_BLADDER_CANCER_CLUSTER_3_DN               | 195 | 0.30991673 | 1.4436786 | 0.00680272 | 0.07945768 | 1     |
| NIELSEN_SYNOVIAL_SARCOMA_DN                        | 19  | 0.5753909  | 1.6542944 | 0.00686499 | 0.02434727 | 0.999 |
| KANG_FLUOROURACIL_RESISTANCE_DN                    | 16  | 0.65560466 | 1.7580123 | 0.00704225 | 0.01223874 | 0.945 |
| MARCHINI TRABECTEDIN_RESISTANCE_UP                 | 20  | 0.56548685 | 1.6892393 | 0.00705882 | 0.01947915 | 0.995 |
| ZHAN_MULTIPLE_MYELOMA_CD1_DN                       | 39  | 0.4497797  | 1.5823715 | 0.00719425 | 0.03683824 | 1     |
| TAKEDA_TARGETS_OF_NUP98_HOXA9_FUSION_6HR_DN        | 36  | 0.49319357 | 1.6559314 | 0.00728155 | 0.02424615 | 0.999 |
| BURTON_ADIPOGENESIS_PEAK_AT_8HR                    | 32  | 0.51234746 | 1.7249085 | 0.00742574 | 0.01541311 | 0.983 |
| BANDRES_RESPONSE_TO_CARMUSTIN_WITHOUT_MGMT_48HR_DN | 28  | 0.5544736  | 1.75063   | 0.00744417 | 0.01296043 | 0.955 |
| OSADA_ASCL1_TARGETS_DN                             | 23  | 0.5406218  | 1.6668478 | 0.00744417 | 0.02274098 | 0.998 |
| NAKAJIMA_MAST_CELL                                 | 44  | 0.45692316 | 1.6709949 | 0.00746269 | 0.02204922 | 0.998 |
| SHEN_SMARCA2_TARGETS_DN                            | 296 | 0.27721718 | 1.3509965 | 0.00746269 | 0.12684633 | 1     |
| DAVICIONI_TARGETS_OF_PAX_FOXO1_FUSIONS_UP          | 235 | 0.305524   | 1.4466394 | 0.00754717 | 0.07827367 | 1     |
| BAELDE_DIABETIC_NEPHROPATHY_UP                     | 79  | 0.38804767 | 1.5756922 | 0.00759494 | 0.03824272 | 1     |
| PAPASPYRIDONOS_UNSTABLE_ATEROSCLEROTIC_PLAQUE_UP   | 42  | 0.44658652 | 1.6158482 | 0.00763359 | 0.03066309 | 1     |
| HELLER_HDAC_TARGETS_SILENCED_BY_METHYLATION_DN     | 242 | 0.2782618  | 1.3168337 | 0.00766284 | 0.14901069 | 1     |
| CADWELL_ATG16L1_TARGETS_UP                         | 85  | 0.38709393 | 1.5687301 | 0.0078125  | 0.0396674  | 1     |
| LEE_METASTASIS_AND_ALTERNATIVE_SPLICING_UP         | 70  | 0.38146737 | 1.5157561 | 0.00802139 | 0.0535834  | 1     |
| THUM_SYSTOLIC_HEART_FAILURE_UP                     | 371 | 0.25869137 | 1.2846425 | 0.00803213 | 0.17396557 | 1     |
| ZHONG_SECRETOME_OF_LUNG_CANCER_AND_ENDOTHELIUM     | 58  | 0.4043805  | 1.545393  | 0.00813008 | 0.04566747 | 1     |



|                                                |     |            |           |            |            |       |
|------------------------------------------------|-----|------------|-----------|------------|------------|-------|
| GAVIN_FOXP3_TARGETS_CLUSTER_T4                 | 81  | 0.39112014 | 1.560019  | 0.00815217 | 0.04213343 | 1     |
| LINDSTEDT_DENDRITIC_CELL_MATURATION_C          | 64  | 0.41427594 | 1.6267667 | 0.00852273 | 0.02862096 | 1     |
| WAMUNYOKOLI_OVARIAN_CANCER_GRADES_1_2_UP       | 122 | 0.3333969  | 1.4264419 | 0.00862069 | 0.08694469 | 1     |
| SASSON_RESPONSE_TO_FORSKOLIN_DN                | 83  | 0.3724605  | 1.5115844 | 0.00864553 | 0.05496653 | 1     |
| CHANDRAN_METASTASIS_DN                         | 262 | 0.28764755 | 1.3898293 | 0.00865801 | 0.10466283 | 1     |
| LE_SKI_TARGETS_UP                              | 17  | 0.58800405 | 1.6760818 | 0.00886918 | 0.02156583 | 0.997 |
| MAINA_VHL_TARGETS_DN                           | 17  | 0.6302562  | 1.7886904 | 0.00888889 | 0.00945231 | 0.875 |
| CHIARADONNA_NEOPLASTIC_TRANSFORMATION_CDC25_UP | 114 | 0.35382015 | 1.5095111 | 0.00898204 | 0.05551484 | 1     |
| ROY_WOUND_BLOOD_VESSEL_DN                      | 20  | 0.5958339  | 1.7558147 | 0.00902935 | 0.01240205 | 0.946 |
| VERRECCHIA_RESPONSE_TO_TGFB1_C2                | 24  | 0.5703322  | 1.777644  | 0.00909091 | 0.01050156 | 0.905 |
| ZIRN_TRETINOIN_RESPONSE_UP                     | 18  | 0.6079697  | 1.7114098 | 0.00913242 | 0.01712048 | 0.992 |
| FIGUEROA_AML_METHYLATION_CLUSTER_6_DN          | 31  | 0.47025448 | 1.5750352 | 0.00925926 | 0.03832719 | 1     |
| SEMENZA_HIF1_TARGETS                           | 34  | 0.5140627  | 1.7094182 | 0.00947867 | 0.01726248 | 0.993 |
| POMEROY_MEDULLOBLASTOMA_PROGNOSIS_UP           | 40  | 0.44957918 | 1.5946813 | 0.00947867 | 0.03446952 | 1     |
| OLSSON_E2F3_TARGETS_UP                         | 25  | 0.54124326 | 1.6741439 | 0.00952381 | 0.02168143 | 0.998 |
| HSIAO_HOUSEKEEPING_GENES                       | 351 | 0.2525113  | 1.2456019 | 0.00952381 | 0.20488614 | 1     |
| WANG_METASTASIS_OF_BREAST_CANCER_ESR1_DN       | 24  | 0.53973985 | 1.6604158 | 0.00954654 | 0.02361643 | 0.999 |
| GAUSSMANN_MLL_AF4_FUSION_TARGETS_F_DN          | 29  | 0.52613914 | 1.6909351 | 0.00961539 | 0.01922708 | 0.994 |
| WINNEPENNINCKX_MELANOMA_METASTASIS_DN          | 38  | 0.47012556 | 1.6234671 | 0.00973236 | 0.0292833  | 1     |
| ZHAN_V1_LATE_DIFFERENTIATION_GENES_UP          | 32  | 0.4826035  | 1.6177012 | 0.00980392 | 0.03032666 | 1     |

**Table S3. GSEA report for cancer stem cells (CSC) vs non-stimulation (NS)**

| NAME                                                       | SIZE | ES         | NES       | NOM p-val | FDR q-val | FWER p-val |
|------------------------------------------------------------|------|------------|-----------|-----------|-----------|------------|
| MISSIAGLIA_REGULATED_BY_METHYLATION_UP                     | 106  | 0.7293896  | 3.057931  | 0         | 0         | 0          |
| PODAR_RESPONSE_TO_ADAPHOSTIN_UP                            | 132  | 0.6993402  | 3.0442166 | 0         | 0         | 0          |
| ZHANG_RESPONSE_TO_IKK_INHIBITOR_AND_TNF_UP                 | 200  | 0.6587559  | 3.0314295 | 0         | 0         | 0          |
| ELVIDGE_HYPOXIA_BY_DMOG_UP                                 | 116  | 0.71219075 | 3.0027227 | 0         | 0         | 0          |
| MOSERLE_IFNA_RESPONSE                                      | 30   | 0.918825   | 2.967307  | 0         | 0         | 0          |
| HECKER_IFNB1_TARGETS                                       | 87   | 0.70694256 | 2.9013548 | 0         | 0         | 0          |
| DUTERTRE ESTRADIOL_RESPONSE_24HR_DN                        | 470  | 0.5787904  | 2.8720818 | 0         | 0         | 0          |
| NAGASHIMA_NRG1_SIGNALING_UP                                | 164  | 0.6353387  | 2.853858  | 0         | 0         | 0          |
| LIANG_SILENCED_BY_METHYLATION_2                            | 50   | 0.7857653  | 2.8437648 | 0         | 0         | 0          |
| PEDERSEN_TARGETS_OF_611CTF_ISOFORM_OF_ERBB2                | 71   | 0.7244628  | 2.8422348 | 0         | 0         | 0          |
| PEDERSEN_METASTASIS_BY_ERBB2_ISOFORM_1                     | 42   | 0.81176305 | 2.8410213 | 0         | 0         | 0          |
| DAUER_STAT3_TARGETS_DN                                     | 46   | 0.7819136  | 2.793226  | 0         | 0         | 0          |
| ZWANG_CLASS_3_TRANSIENTLY_INDUCED_BY_EGF                   | 196  | 0.6046638  | 2.7596319 | 0         | 0         | 0          |
| ELVIDGE_HYPOXIA_UP                                         | 151  | 0.6251611  | 2.7380078 | 0         | 0         | 0          |
| HIRSCH_CELLULAR_TRANSFORMATION_SIGNATURE_UP                | 220  | 0.5830129  | 2.7237706 | 0         | 0         | 0          |
| STAMBOLSKY_TARGETS_OF_MUTATED_TP53_DN                      | 43   | 0.786343   | 2.720371  | 0         | 0         | 0          |
| BOWIE_RESPONSE_TO_TAMOXIFEN                                | 18   | 0.9423749  | 2.6918771 | 0         | 0         | 0          |
| GALINDO_IMMUNE_RESPONSE_TO_ENTEROTOXIN                     | 78   | 0.6771553  | 2.6802526 | 0         | 0         | 0          |
| DER_IFN_BETA_RESPONSE_UP                                   | 96   | 0.64499927 | 2.6347268 | 0         | 0         | 0          |
| WINZEN_DEGRADED_VIA_KHSRP                                  | 92   | 0.6506383  | 2.633151  | 0         | 0         | 0          |
| SANA_TNF_SIGNALING_UP                                      | 78   | 0.663363   | 2.6136773 | 0         | 0         | 0          |
| PRAMOONJAGO_SOX4_TARGETS_UP                                | 49   | 0.7346835  | 2.6108518 | 0         | 0         | 0          |
| DER_IFN_ALPHA_RESPONSE_UP                                  | 69   | 0.6764367  | 2.6045108 | 0         | 0         | 0          |
| ZHANG_INTERFERON_RESPONSE                                  | 23   | 0.8421849  | 2.6031234 | 0         | 0         | 0          |
| SEITZ_NEOPLASTIC_TRANSFORMATION_BY_8P_DELETION_UP          | 68   | 0.6834277  | 2.5948036 | 0         | 0         | 0          |
| ALTEMEIER_RESPONSE_TO_LPS_WITH_MECHANICAL_VENTILATION      | 114  | 0.6079756  | 2.585817  | 0         | 0         | 0          |
| PHONG_TNF_TARGETS_UP                                       | 60   | 0.6830423  | 2.5829682 | 0         | 0         | 0          |
| TAKEDA_TARGETS_OF_NUP98_HOXA9_FUSION_3D_UP                 | 157  | 0.5725755  | 2.5801861 | 0         | 0         | 0          |
| TIEN_INTESTINE_PROBIOTICS_24HR_DN                          | 195  | 0.5776692  | 2.5660875 | 0         | 0         | 0          |
| SARRIO_EPITHELIAL_MESENCHYMAL_TRANSITION_DN                | 137  | 0.59149975 | 2.5648036 | 0         | 0         | 0          |
| CHARAFE_BREAST_CANCER_LUMINAL_VS_BASAL_DN                  | 412  | 0.5271776  | 2.5631874 | 0         | 0         | 0          |
| MENSE_HYPOXIA_UP                                           | 81   | 0.62613344 | 2.5487711 | 0         | 0         | 0          |
| BROWNE_INTERFERON_RESPONSIVE_GENES                         | 63   | 0.66698015 | 2.5270178 | 0         | 0         | 0          |
| BOSCO_INTERFERON_INDUCED_ANTIVIRAL_MODULE                  | 68   | 0.6507187  | 2.5191126 | 0         | 0         | 0          |
| BENNETT_SYSTEMIC_LUPUS_ERYTHEMATOSUS                       | 28   | 0.79069394 | 2.5171309 | 0         | 0         | 0          |
| TAKEDA_TARGETS_OF_NUP98_HOXA9_FUSION_8D_UP                 | 137  | 0.5785836  | 2.513306  | 0         | 0         | 0          |
| NAGASHIMA_EGF_SIGNALING_UP                                 | 54   | 0.684926   | 2.5074222 | 0         | 0         | 0          |
| AMIT_EGF_RESPONSE_120_HELA                                 | 60   | 0.67117006 | 2.5044954 | 0         | 0         | 0          |
| PACHER_TARGETS_OF_IGF1_AND_IGF2_UP                         | 35   | 0.7331994  | 2.499071  | 0         | 0         | 0          |
| GROSS_HYPOXIA_VIA_ELK3_DN                                  | 144  | 0.5610772  | 2.496308  | 0         | 0         | 0          |
| BOWIE_RESPONSE_TO_EXTRACELLULAR_MATRIX                     | 16   | 0.90632313 | 2.4877367 | 0         | 0         | 0          |
| ONDER_CDH1_TARGETS_2_DN                                    | 433  | 0.49483523 | 2.4826772 | 0         | 0         | 0          |
| GAJATE_RESPONSE_TO TRABECTEDIN_UP                          | 61   | 0.64250255 | 2.4807878 | 0         | 0         | 0          |
| KIM_LRRC3B_TARGETS                                         | 28   | 0.7811797  | 2.4647965 | 0         | 0         | 0          |
| BLUM_RESPONSE_TO_SALIRASIB_UP                              | 228  | 0.5277439  | 2.4576268 | 0         | 0         | 0          |
| LINDSTEDT_DENDRITIC_CELL_MATURATION_A                      | 61   | 0.6521481  | 2.454089  | 0         | 0         | 0          |
| ELVIDGE_HIF1A_AND_HIF2A_TARGETS_DN                         | 92   | 0.6006417  | 2.450192  | 0         | 0         | 0          |
| EINAV_INTERFERON_SIGNATURE_IN_CANCER                       | 26   | 0.7734808  | 2.4440365 | 0         | 0         | 0          |
| KRIGE_AMINO_ACID_DEPRIVATION                               | 29   | 0.75170827 | 2.443355  | 0         | 0         | 0          |
| BURTON_ADIPOGENESIS_1                                      | 32   | 0.73402303 | 2.4403167 | 0         | 0         | 0          |
| PHONG_TNF_RESPONSE_VIA_P38_PARTIAL                         | 148  | 0.55113953 | 2.426761  | 0         | 0         | 0          |
| GHANDHI_DIRECT_IRRADIATION_UP                              | 94   | 0.58822703 | 2.426441  | 0         | 0         | 0          |
| CROMER_TUMORIGENESIS_UP                                    | 58   | 0.63576174 | 2.4214728 | 0         | 0         | 0          |
| SANA_RESPONSE_TO_IFNG_UP                                   | 63   | 0.6404561  | 2.4152598 | 0         | 0         | 0          |
| TAKEDA_TARGETS_OF_NUP98_HOXA9_FUSION_10D_UP                | 172  | 0.5391363  | 2.4149804 | 0         | 0         | 0          |
| AMIT_SERUM_RESPONSE_240_MCF10A                             | 53   | 0.6563013  | 2.4095612 | 0         | 0         | 0          |
| CHANG_CORE_SERUM_RESPONSE_DN                               | 175  | 0.53348994 | 2.4070175 | 0         | 0         | 0          |
| MAHADEVAN_RESPONSE_TO_MP470_DN                             | 18   | 0.85108364 | 2.40036   | 0         | 0         | 0          |
| DER_IFN_GAMMA_RESPONSE_UP                                  | 66   | 0.6272581  | 2.4003272 | 0         | 0         | 0          |
| RASHI_RESPONSE_TO_IONIZING_RADIATION_2                     | 111  | 0.56350505 | 2.3856387 | 0         | 0         | 0          |
| HENDRICKS_SMARCA4_TARGETS_UP                               | 54   | 0.64409167 | 2.380033  | 0         | 0         | 0          |
| HUPER_BREAST_BASAL_VS_LUMINAL_UP                           | 51   | 0.65075123 | 2.3791826 | 0         | 0         | 0          |
| PICCALUGA_ANGIOIMMUNOBLASTIC_LYMPHOMA_DN                   | 120  | 0.5600636  | 2.370341  | 0         | 0         | 0          |
| GROSS_HYPOXIA_VIA_ELK3_ONLY_UP                             | 32   | 0.71694654 | 2.3678668 | 0         | 0         | 0          |
| YAMASHITA_METHYLATED_IN_PROSTATE_CANCER                    | 49   | 0.64300907 | 2.3650973 | 0         | 0         | 0          |
| NEMETH_INFLAMMATORY_RESPONSE_LPS_UP                        | 83   | 0.5958849  | 2.3611436 | 0         | 0         | 0          |
| FARMER_BREAST_CANCER_CLUSTER_1                             | 38   | 0.69028413 | 2.3570125 | 0         | 0         | 0          |
| MARKEY_RB1_ACUTE_LOF_UP                                    | 191  | 0.5187861  | 2.3486888 | 0         | 0         | 0          |
| GROSS_HYPOXIA_VIA_ELK3_AND_HIF1A_UP                        | 131  | 0.5415093  | 2.3292553 | 0         | 0         | 0          |
| AMIT_SERUM_RESPONSE_60_MCF10A                              | 56   | 0.6294554  | 2.327757  | 0         | 0         | 0          |
| GARGALOVIC_RESPONSE_TO_OXIDIZED_PHOSPHOLIPIDS_TURQUOISE_UP | 72   | 0.5964552  | 2.323348  | 0         | 0         | 0          |
| HUANG_DASATINIB_RESISTANCE_UP                              | 72   | 0.6043739  | 2.3182454 | 0         | 0         | 0          |
| AMIT_EGF_RESPONSE_480_HELA                                 | 147  | 0.5250099  | 2.3088734 | 0         | 0         | 0          |
| HAN_JNK_SIGNALING_UP                                       | 34   | 0.67839295 | 2.3040671 | 0         | 0         | 0          |
| YAN_ESCAPE_FROM_ANOIKIS                                    | 20   | 0.79459786 | 2.2970972 | 0         | 0         | 0          |
| CHANG_IMMORTALIZED_BY_HP31_DN                              | 61   | 0.6128991  | 2.2969403 | 0         | 0         | 0          |
| BILD_HRAS_ONCOGENIC_SIGNATURE                              | 229  | 0.4911492  | 2.2965846 | 0         | 0         | 0          |

|                                                                |     |            |           |   |          |       |
|----------------------------------------------------------------|-----|------------|-----------|---|----------|-------|
| HAHTOLA_MYCOSIS_FUNGOIDES_CD4_UP                               | 60  | 0.6093679  | 2.2943704 | 0 | 0        | 0     |
| XU_HGF_SIGNALING_NOT_VIA_AKT1_48HR_UP                          | 31  | 0.70182794 | 2.2860923 | 0 | 0        | 0     |
| RICKMAN_TUMOR_DIFFERENTIATED_WELL_VS_POORLY_DN                 | 335 | 0.46873343 | 2.2849898 | 0 | 0        | 0     |
| WINTER_HYPOXIA_METAGENE                                        | 218 | 0.4967555  | 2.283081  | 0 | 0        | 0     |
| SEKI_INFLAMMATORY_RESPONSE_LPS_UP                              | 70  | 0.58901054 | 2.2825549 | 0 | 0        | 0     |
| TRAYNOR_RETT_SYNDROM_UP                                        | 40  | 0.66923624 | 2.276549  | 0 | 0        | 0     |
| JECHLINGER_EPITHELIAL_TO_MESENCHYMAL_TRANSITION_UP             | 66  | 0.5907212  | 2.2747343 | 0 | 0        | 0     |
| KERLEY_RESPONSE_TO_CISPLATIN_UP                                | 40  | 0.6479545  | 2.2746668 | 0 | 0        | 0     |
| RODRIGUES_THYROID_CARCINOMA_DN                                 | 66  | 0.59765226 | 2.269986  | 0 | 0        | 0     |
| AMIT_EGF_RESPONSE_60_MCF10A                                    | 36  | 0.65129495 | 2.2697742 | 0 | 0        | 0     |
| JI_METASTASIS_REPRESSED_BY_STK11                               | 26  | 0.7284544  | 2.268739  | 0 | 0        | 0     |
| JOHNSTONE_PARVB_TARGETS_3_UP                                   | 386 | 0.46408284 | 2.265432  | 0 | 0        | 0     |
| ZWANG_CLASS_1_TRANSIENTLY_INDUCED_BY_EGF                       | 448 | 0.45606282 | 2.2642658 | 0 | 0        | 0     |
| FURUKAWA_DUSP6_TARGETS_PCI35_UP                                | 62  | 0.5915279  | 2.262403  | 0 | 0        | 0     |
| MUELLER_METHYLATED_IN_GLIOMASTOMA                              | 36  | 0.685832   | 2.2606936 | 0 | 0        | 0     |
| TSAI_RESPONSE_TO_RADIATION_THERAPY                             | 31  | 0.71015644 | 2.2566469 | 0 | 1.93E-05 | 0.001 |
| WUNDER_INFLAMMATORY_RESPONSE_AND_CHOLESTEROL_UP                | 47  | 0.6281637  | 2.2566226 | 0 | 1.91E-05 | 0.001 |
| BURTON_ADIPOGENESIS_PEAK_AT_2HR                                | 50  | 0.60837215 | 2.2485104 | 0 | 1.89E-05 | 0.001 |
| SENESE_HDAC3_TARGETS_UP                                        | 439 | 0.45497918 | 2.2480788 | 0 | 1.87E-05 | 0.001 |
| AZARE_NEOPLASTIC_TRANSFORMATION_BY_STAT3_DN                    | 110 | 0.5320731  | 2.243859  | 0 | 1.85E-05 | 0.001 |
| NAKAMURA_ADIPOGENESIS_EARLY_DN                                 | 37  | 0.6602386  | 2.2430341 | 0 | 1.83E-05 | 0.001 |
| TONKS_TARGETS_OF_RUNX1_RUNX1T1_FUSION_ERYTHROCYTE_UP           | 145 | 0.5102405  | 2.2396066 | 0 | 1.82E-05 | 0.001 |
| ELVIDGE_HIF1A_TARGETS_DN                                       | 79  | 0.5665348  | 2.2370842 | 0 | 1.80E-05 | 0.001 |
| MURATA_VIRULENCE_OF_H_PILORI                                   | 24  | 0.7455786  | 2.2367089 | 0 | 1.78E-05 | 0.001 |
| HINATA_NFKB_TARGETS_KERATINOCYTE_UP                            | 85  | 0.5627292  | 2.2329383 | 0 | 5.27E-05 | 0.003 |
| TAKEDA_TARGETS_OF_NUP98_HOXA9_FUSION_16D_UP                    | 154 | 0.501276   | 2.2306368 | 0 | 5.22E-05 | 0.003 |
| INGA_TP53_TARGETS                                              | 16  | 0.78778696 | 2.2286289 | 0 | 5.17E-05 | 0.003 |
| KRASNOSELSKAYA_ILF3_TARGETS_UP                                 | 35  | 0.6619861  | 2.2283957 | 0 | 5.12E-05 | 0.003 |
| DELPUECH_FOXO3_TARGETS_UP                                      | 64  | 0.5737239  | 2.2262752 | 0 | 5.07E-05 | 0.003 |
| ICHIBA_GRAFT_VERSUS_HOST_DISEASE_D7_UP                         | 89  | 0.5517318  | 2.226007  | 0 | 5.02E-05 | 0.003 |
| PLASARI_TGFB1_TARGETS_10HR_UP                                  | 184 | 0.49677658 | 2.22296   | 0 | 6.68E-05 | 0.004 |
| KINSEY_TARGETS_OF_EWSR1_FLII_FUSION_DN                         | 289 | 0.46179307 | 2.2195325 | 0 | 6.62E-05 | 0.004 |
| GESERICK_TERT_TARGETS_DN                                       | 20  | 0.7646296  | 2.2187989 | 0 | 6.56E-05 | 0.004 |
| ZHU_CMV_8_HR_UP                                                | 43  | 0.6380379  | 2.2163517 | 0 | 6.50E-05 | 0.004 |
| BECKER_TAMOXIFEN_RESISTANCE_UP                                 | 47  | 0.6279284  | 2.2142496 | 0 | 6.44E-05 | 0.004 |
| DIRMEIER_LMP1_RESPONSE_EARLY                                   | 65  | 0.5671411  | 2.2099729 | 0 | 6.38E-05 | 0.004 |
| CHARAFE_BREAST_CANCER_BASAL_VS_MESENCHYMAL_UP                  | 110 | 0.5229648  | 2.2064033 | 0 | 6.33E-05 | 0.004 |
| FOSTER_TOLERANT_MACROPHAGE_UP                                  | 141 | 0.49034768 | 2.2030292 | 0 | 7.83E-05 | 0.005 |
| HORIUCHI_WTAP_TARGETS_UP                                       | 254 | 0.46691296 | 2.198037  | 0 | 9.29E-05 | 0.006 |
| BROWNE_HCMV_INFECTION_4HR_UP                                   | 50  | 0.6042146  | 2.1868804 | 0 | 1.08E-04 | 0.007 |
| WU_CELL_MIGRATION                                              | 172 | 0.48307118 | 2.1863225 | 0 | 1.07E-04 | 0.007 |
| GHANDHI_BYSTANDER_IRRADIATION_UP                               | 76  | 0.55451447 | 2.1762922 | 0 | 1.21E-04 | 0.008 |
| SESTO_RESPONSE_TO_UV_C1                                        | 63  | 0.56623954 | 2.1740084 | 0 | 1.20E-04 | 0.008 |
| BASAKI_YBX1_TARGETS_DN                                         | 318 | 0.45408028 | 2.170573  | 0 | 1.19E-04 | 0.008 |
| COATES_MACROPHAGE_M1_VS_M2_DN                                  | 60  | 0.5829428  | 2.1694171 | 0 | 1.18E-04 | 0.008 |
| SMIRNOV_RESPONSE_TO_IR_2HR_UP                                  | 46  | 0.6009151  | 2.1659176 | 0 | 1.17E-04 | 0.008 |
| TONKS_TARGETS_OF_RUNX1_RUNX1T1_FUSION_SUSTAINED_IN_MONOCYTE_UP | 19  | 0.7448264  | 2.1655116 | 0 | 1.16E-04 | 0.008 |
| KOBAYASHI_EGFR_SIGNALING_24HR_UP                               | 87  | 0.53121793 | 2.1631098 | 0 | 1.15E-04 | 0.008 |
| PETROVA_ENDOTHELIUM_LYMPHATIC_VS_BLOOD_DN                      | 156 | 0.49082464 | 2.1613803 | 0 | 1.14E-04 | 0.008 |
| CASTELLANO_NRAS_TARGETS_UP                                     | 60  | 0.5865231  | 2.159215  | 0 | 1.27E-04 | 0.009 |
| FULCHER_INFLAMMATORY_RESPONSE_LLECTIN_VS_LPS_DN                | 391 | 0.43811232 | 2.1575701 | 0 | 1.26E-04 | 0.009 |
| FARDIN_HYPOXIA_11                                              | 26  | 0.67808795 | 2.1461627 | 0 | 1.69E-04 | 0.012 |
| XU_AKT1_TARGETS_6HR                                            | 26  | 0.66891676 | 2.1384857 | 0 | 2.10E-04 | 0.015 |
| APPEL_IMATINIB_RESPONSE                                        | 31  | 0.666035   | 2.1343644 | 0 | 2.08E-04 | 0.015 |
| MCLACHLAN_DENTAL_CARIES_UP                                     | 214 | 0.45838204 | 2.1331055 | 0 | 2.20E-04 | 0.016 |
| LEONARD_HYPOXIA                                                | 44  | 0.5898035  | 2.132728  | 0 | 2.18E-04 | 0.016 |
| NOJIMA_SFRP2_TARGETS_UP                                        | 28  | 0.6639126  | 2.1308067 | 0 | 2.16E-04 | 0.016 |
| SAGIV_CD24_TARGETS_DN                                          | 43  | 0.6174969  | 2.1288404 | 0 | 2.15E-04 | 0.016 |
| STAMBOLSKY_RESPONSE_TO_VITAMIN_D3_UP                           | 71  | 0.54418635 | 2.1270847 | 0 | 2.13E-04 | 0.016 |
| HOFFMANN_PRE_BI_TO_LARGE_PRE_BII_LYMPHOCYTE_DN                 | 64  | 0.55329156 | 2.1201866 | 0 | 2.52E-04 | 0.019 |
| KIM_WT1_TARGETS_UP                                             | 196 | 0.46382558 | 2.11623   | 0 | 2.64E-04 | 0.02  |
| DORN_ADENOVIRUS_INFECTION_12HR_UP                              | 27  | 0.6681869  | 2.1104257 | 0 | 2.87E-04 | 0.022 |
| MANALO_HYPOXIA_UP                                              | 187 | 0.462293   | 2.1096206 | 0 | 2.98E-04 | 0.023 |
| CASORELLI_ACUTE_PROMYELOCYTIC_LEUKEMIA_UP                      | 149 | 0.47301468 | 2.1094024 | 0 | 3.22E-04 | 0.025 |
| BOYLAN_MULTIPLE_MYELOMA_PCA1_UP                                | 95  | 0.5238396  | 2.1093607 | 0 | 3.20E-04 | 0.025 |
| PASINI_SUZ12_TARGETS_DN                                        | 297 | 0.44051334 | 2.1074662 | 0 | 3.30E-04 | 0.026 |
| JISON_SICKLE_CELL_DISEASE_UP                                   | 170 | 0.48126784 | 2.1072898 | 0 | 3.28E-04 | 0.026 |
| VILIMAS_NOTCH1_TARGETS_UP                                      | 48  | 0.5729236  | 2.1051588 | 0 | 3.26E-04 | 0.026 |
| CONCANNON_APOPTOSIS_BY_EPOXOMICIN_UP                           | 214 | 0.44754565 | 2.1048648 | 0 | 3.23E-04 | 0.026 |
| LEE_LIVER_CANCER_HEPATOBLAST                                   | 16  | 0.7651594  | 2.1047044 | 0 | 3.21E-04 | 0.026 |
| COLIN_PILOCYTIC_ASTROCYTOMA_VS_GLIOMASTOMA_DN                  | 27  | 0.6790476  | 2.1024415 | 0 | 3.44E-04 | 0.028 |
| DELYS_THYROID_CANCER_UP                                        | 410 | 0.426143   | 2.099099  | 0 | 3.54E-04 | 0.029 |
| WANG_CLIM2_TARGETS_DN                                          | 155 | 0.4759369  | 2.099059  | 0 | 3.51E-04 | 0.029 |
| FERRARI_RESPONSE_TO_FENRETINIDE_UP                             | 18  | 0.7540442  | 2.0951984 | 0 | 3.61E-04 | 0.03  |
| THEILGAARD_NEUTROPHIL_AT_SKIN_WOUND_UP                         | 73  | 0.54033035 | 2.0949774 | 0 | 3.70E-04 | 0.031 |
| JAEGER_METASTASIS_DN                                           | 238 | 0.44471094 | 2.0930145 | 0 | 3.92E-04 | 0.033 |
| DEBIASI_APOPTOSIS_BY_REOVIRUS_INFECTION_UP                     | 277 | 0.44408023 | 2.089115  | 0 | 4.13E-04 | 0.035 |
| JEON_SMAD6_TARGETS_UP                                          | 21  | 0.70743066 | 2.0867648 | 0 | 4.23E-04 | 0.036 |
| TAVOR_CEBPA_TARGETS_DN                                         | 28  | 0.65814334 | 2.0861285 | 0 | 4.20E-04 | 0.036 |

|                                                            |     |            |           |   |            |       |
|------------------------------------------------------------|-----|------------|-----------|---|------------|-------|
| GRAESSMANN_RESPONSE_TO_MC_AND_SERUM_DEPRIVATION_UP         | 181 | 0.45994198 | 2.0857918 | 0 | 4.17E-04   | 0.036 |
| NAKAYAMA_FRA2_TARGETS                                      | 41  | 0.59916866 | 2.085664  | 0 | 4.15E-04   | 0.036 |
| BROCKE_APOPTOSIS_REVERSED_BY_IL6                           | 135 | 0.47969928 | 2.078726  | 0 | 4.68E-04   | 0.041 |
| NOJIMA_SFRP2_TARGETS_DN                                    | 23  | 0.69026136 | 2.0746746 | 0 | 5.11E-04   | 0.043 |
| NAKAYAMA_SOFT_TISSUE_TUMORS_PCA1_UP                        | 66  | 0.5335496  | 2.0727894 | 0 | 5.20E-04   | 0.044 |
| GRAHAM_NORMAL QUIESCENT_VS_NORMAL_DIVIDING_UP              | 61  | 0.5448384  | 2.0726209 | 0 | 5.27E-04   | 0.045 |
| DASU_IL6_SIGNALING_UP                                      | 55  | 0.5578205  | 2.0685859 | 0 | 5.45E-04   | 0.047 |
| DORN_ADENOVIRUS_INFECTION_48HR_DN                          | 35  | 0.62630546 | 2.0669491 | 0 | 5.64E-04   | 0.049 |
| GEISS_RESPONSE_TO_DSRNA_UP                                 | 33  | 0.64099336 | 2.0665536 | 0 | 5.71E-04   | 0.05  |
| KIM_PTEN_TARGETS_UP                                        | 15  | 0.752369   | 2.0664833 | 0 | 5.68E-04   | 0.05  |
| DORSAM_HOXA9_TARGETS_DN                                    | 29  | 0.6450368  | 2.065869  | 0 | 5.75E-04   | 0.051 |
| RICKMAN_TUMOR_DIFFERENTIATED_WELL_VS_MODERATELY_DN         | 102 | 0.49626684 | 2.0644433 | 0 | 5.82E-04   | 0.052 |
| FRASOR_RESPONSE_TO ESTRADIOL_DN                            | 76  | 0.5250712  | 2.0593154 | 0 | 6.64E-04   | 0.06  |
| WANG_TNF_TARGETS                                           | 23  | 0.6967606  | 2.058146  | 0 | 7.04E-04   | 0.064 |
| CORRE_MULTIPLE_MYELOMA_UP                                  | 61  | 0.54422957 | 2.0560842 | 0 | 7.21E-04   | 0.066 |
| WIERENGA_STAT5A_TARGETS_UP                                 | 194 | 0.44802564 | 2.054654  | 0 | 7.17E-04   | 0.066 |
| LINDSTEDT_DENDRITIC_CELL_MATURATION_B                      | 48  | 0.58739865 | 2.0509799 | 0 | 7.86E-04   | 0.073 |
| LIAN_LIPA_TARGETS_6M                                       | 65  | 0.5406639  | 2.0483298 | 0 | 8.22E-04   | 0.076 |
| BAELDE_DIABETIC_NEPHROPATHY_DN                             | 406 | 0.4051208  | 2.0474222 | 0 | 8.28E-04   | 0.077 |
| BROWN_MYELOID_CELL_DEVELOPMENT_UP                          | 145 | 0.4713967  | 2.047323  | 0 | 8.24E-04   | 0.077 |
| GRAHAM_CML_DIVIDING_VS_NORMAL QUIESCENT_DN                 | 87  | 0.5158514  | 2.0444894 | 0 | 8.81E-04   | 0.083 |
| BAE_BRCA1_TARGETS_UP                                       | 69  | 0.53226745 | 2.044264  | 0 | 8.86E-04   | 0.084 |
| WORSCHER_TUMOR_REJECTION_UP                                | 51  | 0.56233156 | 2.0436552 | 0 | 9.01E-04   | 0.086 |
| GROSS_ELK3_TARGETS_DN                                      | 32  | 0.6228013  | 2.0432935 | 0 | 9.06E-04   | 0.087 |
| FALVELLA_SMOKERS_WITH_LUNG_CANCER                          | 68  | 0.5284936  | 2.041535  | 0 | 9.11E-04   | 0.088 |
| FARMER_BREAST_CANCER_CLUSTER_4                             | 16  | 0.73552364 | 2.040223  | 0 | 9.15E-04   | 0.089 |
| REN_ALVEOLAR_RHABDOMYOSARCOMA_DN                           | 379 | 0.41493782 | 2.0382462 | 0 | 9.30E-04   | 0.091 |
| UROSEVIC_RESPONSE_TO_IMIQUIMOD                             | 21  | 0.6872002  | 2.0382152 | 0 | 9.25E-04   | 0.091 |
| AMIT_EGF_RESPONSE_60_HELA                                  | 40  | 0.5898137  | 2.037977  | 0 | 9.20E-04   | 0.091 |
| HARRIS_HYPOXIA                                             | 77  | 0.51442    | 2.0341728 | 0 | 9.53E-04   | 0.094 |
| PARK_APL_PATHOGENESIS_DN                                   | 45  | 0.58220303 | 2.0327828 | 0 | 9.48E-04   | 0.094 |
| XU_HGF_SIGNALING_NOT_VIA_AKT1_6HR                          | 23  | 0.65863645 | 2.031974  | 0 | 9.73E-04   | 0.097 |
| ONDER_CDH1_TARGETS_1_UP                                    | 120 | 0.46716276 | 2.0317163 | 0 | 9.68E-04   | 0.097 |
| LAIHO_COLORECTAL_CANCER_SERRATED_UP                        | 99  | 0.4915328  | 2.028615  | 0 | 9.82E-04   | 0.099 |
| GRAHAM_CML QUIESCENT_VS_NORMAL_DIVIDING_UP                 | 48  | 0.5552447  | 2.0278318 | 0 | 9.77E-04   | 0.099 |
| NEWMAN_ERCC6_TARGETS_UP                                    | 22  | 0.6815408  | 2.0253766 | 0 | 0.00101022 | 0.102 |
| CERVERA_SDHB_TARGETS_1_UP                                  | 98  | 0.48750496 | 2.0249846 | 0 | 0.00101422 | 0.103 |
| PHONG_TNF_RESPONSE_NOT_VIA_P38                             | 317 | 0.42495838 | 2.0247796 | 0 | 0.00100899 | 0.103 |
| AMIT_SERUM_RESPONSE_120_MCF10A                             | 56  | 0.54347044 | 2.0239499 | 0 | 0.00102263 | 0.104 |
| RADAEVA_RESPONSE_TO_IFNA1_UP                               | 49  | 0.55551845 | 2.0236247 | 0 | 0.00101742 | 0.104 |
| RUIZ_TNC_TARGETS_UP                                        | 137 | 0.46315044 | 2.0235345 | 0 | 0.00101225 | 0.104 |
| HESS_TARGETS_OF_HOXA9_AND_MEIS1_DN                         | 70  | 0.51925695 | 2.0234818 | 0 | 0.00100714 | 0.104 |
| MITSIADES_RESPONSE_TO_APLIDIN_UP                           | 380 | 0.4039283  | 2.0218437 | 0 | 0.00102869 | 0.107 |
| SMIRNOV_RESPONSE_TO_IR_6HR_UP                              | 140 | 0.46230045 | 2.021692  | 0 | 0.00102355 | 0.107 |
| LIN_SILENCED_BY_TUMOR_MICROENVIRONMENT                     | 101 | 0.47805452 | 2.015696  | 0 | 0.00111039 | 0.114 |
| SHAFFER_IRF4_TARGETS_IN_PLASMA_CELL_VS_MATURE_B_LYMPHOCYTE | 63  | 0.5350347  | 2.015462  | 0 | 0.00112261 | 0.116 |
| LEE_LIVER_CANCER_ACOX1_UP                                  | 61  | 0.525969   | 2.0103412 | 0 | 0.00120632 | 0.126 |
| ZHANG_RESPONSE_TO_CANTHARIDIN_UP                           | 18  | 0.710821   | 2.0079389 | 0 | 0.00123676 | 0.13  |
| VERHAAS_GLIOMASTOMA_NEURAL                                 | 187 | 0.44514042 | 2.0045583 | 0 | 0.00126021 | 0.134 |
| SMID_BREAST_CANCER_RELAPSE_IN_BONE_DN                      | 276 | 0.42216086 | 2.0031393 | 0 | 0.00127162 | 0.136 |
| SMIRNOV_CIRCULATING_ENDOTHELIOCYTES_IN_CANCER_UP           | 150 | 0.45690006 | 2.0011184 | 0 | 0.00131802 | 0.142 |
| HELLER_SILENCED_BY METHYLATION_DN                          | 94  | 0.48959514 | 2.0007057 | 0 | 0.00131172 | 0.142 |
| RASHI_NFKB1_TARGETS                                        | 17  | 0.7106629  | 1.9990544 | 0 | 0.00132271 | 0.144 |
| KIM_RESPONSE_TO_TSA_AND_DECITABINE_UP                      | 113 | 0.48424923 | 1.9975315 | 0 | 0.00135077 | 0.147 |
| ODONNELL_TARGETS_OF_MYC_AND_TFRC_UP                        | 73  | 0.5177413  | 1.9971998 | 0 | 0.0013444  | 0.147 |
| WEINMANN_ADAPTATION_TO_HYPOXIA_DN                          | 37  | 0.57822496 | 1.9961988 | 0 | 0.00133809 | 0.147 |
| ONDER_CDH1_SIGNALING_VIA_CTNNB1                            | 78  | 0.49662074 | 1.9951446 | 0 | 0.00134838 | 0.149 |
| GENTILE_UV_LOW_DOSE_UP                                     | 23  | 0.6502147  | 1.9947363 | 0 | 0.00134211 | 0.149 |
| COULOUARN_TEMPORAL_TGFB1_SIGNATURE_UP                      | 99  | 0.48266858 | 1.9945031 | 0 | 0.0013359  | 0.149 |
| KHETCHOUMIAN_TRIM24_TARGETS_UP                             | 44  | 0.5689374  | 1.9931362 | 0 | 0.00137207 | 0.154 |
| HELLEBREKERS_SILENCED_DURING_TUMOR_ANGIOGENESIS            | 75  | 0.5017247  | 1.992545  | 0 | 0.00137437 | 0.155 |
| TOMIDA_METASTASIS_DN                                       | 15  | 0.74485433 | 1.9914266 | 0 | 0.00138426 | 0.156 |
| GUENTHER_GROWTH_SPHERICAL_VS_ADHERENT_DN                   | 25  | 0.6500604  | 1.9900036 | 0 | 0.00141126 | 0.16  |
| TONKS_TARGETS_OF_RUNX1_RUNX1T1_FUSION_HSC_UP               | 169 | 0.444417   | 1.9882531 | 0 | 0.00146275 | 0.166 |
| WILSON_PROTEASES_AT_TUMOR_BONE_INTERFACE_UP                | 20  | 0.6730795  | 1.9882505 | 0 | 0.00145616 | 0.166 |
| SENESE_HDAC1_AND_HDAC2_TARGETS_UP                          | 217 | 0.42446652 | 1.987181  | 0 | 0.00149069 | 0.17  |
| OSADA_ASCL1_TARGETS_DN                                     | 23  | 0.64029276 | 1.9857514 | 0 | 0.00150026 | 0.171 |
| CHEN_LVAD_SUPPORT_OF_FAILING_HEART_UP                      | 96  | 0.47994056 | 1.985057  | 0 | 0.00150169 | 0.172 |
| SEITZ NEOPLASTIC_TRANSFORMATION_BY_8P_DELETION_DN          | 30  | 0.6051102  | 1.9828556 | 0 | 0.00154334 | 0.176 |
| SWEET_KRAS_ONCOGENIC_SIGNATURE                             | 84  | 0.4929668  | 1.9812382 | 0 | 0.00160834 | 0.182 |
| TIAN_TNF_SIGNALING_NOT_VIA_NFKB                            | 20  | 0.67179525 | 1.9809651 | 0 | 0.00160129 | 0.182 |
| KAAB_FAILED_HEART_VENTRICLE_DN                             | 35  | 0.58716583 | 1.9807953 | 0 | 0.00159429 | 0.182 |
| FLECHNER_BIOPSY_KIDNEY_TRANSPLANT_REJECTED_VS_OK_UP        | 81  | 0.49758896 | 1.9774494 | 0 | 0.00170551 | 0.195 |
| SATO_SILENCED_BY METHYLATION_IN_PANCREATIC_CANCER_1        | 375 | 0.40392965 | 1.9770994 | 0 | 0.00170579 | 0.196 |
| DUTERTRE ESTRADIOL_RESPONSE_6HR_DN                         | 84  | 0.49703676 | 1.9758418 | 0 | 0.00171434 | 0.198 |
| ZHOU_INFLAMMATORY_RESPONSE_LPS_UP                          | 357 | 0.4048464  | 1.9757117 | 0 | 0.00170698 | 0.198 |
| AMIT_EGF_RESPONSE_240_HELA                                 | 55  | 0.5272374  | 1.9757098 | 0 | 0.00169968 | 0.198 |
| NAKAMURA_METASTASIS_MODEL_DN                               | 39  | 0.56793696 | 1.9750239 | 0 | 0.00171617 | 0.201 |
| TAKEDA_TARGETS_OF_NUP98_HOXA9_FUSION_10D_DN                | 128 | 0.45995614 | 1.9734157 | 0 | 0.00172404 | 0.203 |

|                                                           |     |            |           |   |            |       |
|-----------------------------------------------------------|-----|------------|-----------|---|------------|-------|
| BRUECKNER_TARGETS_OF_MIRLET7A3_UP                         | 96  | 0.4781302  | 1.9706062 | 0 | 0.00178655 | 0.211 |
| NADLER_OBESITY_UP                                         | 58  | 0.53178877 | 1.9696958 | 0 | 0.00177904 | 0.211 |
| RIGGINS_TAMOXIFEN_RESISTANCE_DN                           | 203 | 0.42567715 | 1.9633048 | 0 | 0.0019685  | 0.23  |
| VERHAAK_AML_WITH_NPM1_MUTATED_UP                          | 166 | 0.4362228  | 1.9608785 | 0 | 0.00200557 | 0.236 |
| MCDOWELL_ACUTE_LUNG_INJURY_UP                             | 43  | 0.56090933 | 1.9601684 | 0 | 0.00200471 | 0.237 |
| CHO_NR4A1_TARGETS                                         | 31  | 0.5952138  | 1.9578763 | 0 | 0.00210245 | 0.248 |
| DORN_ADENOVIRUS_INFECTION_32HR_DN                         | 35  | 0.58046204 | 1.9548118 | 0 | 0.00217587 | 0.257 |
| DANG_REGULATED_BY_MYC_DN                                  | 232 | 0.42131683 | 1.9546835 | 0 | 0.00217423 | 0.257 |
| GARGALOVIC_RESPONSE_TO_OXIDIZED_PHOSPHOLIPIDS_BLACK_UP    | 32  | 0.5905885  | 1.9515932 | 0 | 0.002229   | 0.264 |
| GARGALOVIC_RESPONSE_TO_OXIDIZED_PHOSPHOLIPIDS_GREY_DN     | 55  | 0.5203459  | 1.95086   | 0 | 0.00227092 | 0.268 |
| BRACHAT_RESPONSE_TO_CAMPTOTHECIN_UP                       | 25  | 0.6269081  | 1.9501637 | 0 | 0.00229119 | 0.271 |
| HUMMERICH_SKIN_CANCER_PROGRESSION_UP                      | 84  | 0.48851445 | 1.9497198 | 0 | 0.0022965  | 0.273 |
| WIEDERSCHAIN_TARGETS_OF_BMI1_AND_PCGF2                    | 53  | 0.5286003  | 1.9477355 | 0 | 0.00233026 | 0.279 |
| DELACROIX_RAR_TARGETS_UP                                  | 42  | 0.5611221  | 1.9474585 | 0 | 0.00234302 | 0.282 |
| GRAHAM_CML QUIESCENT VS NORMAL QUIESCENT_DN               | 42  | 0.5620494  | 1.9473022 | 0 | 0.00233373 | 0.282 |
| ZHAN_MULTIPLE_MYELOMA_LB_DN                               | 36  | 0.569666   | 1.9472523 | 0 | 0.0023245  | 0.282 |
| CHIARADONNA NEOPLASTIC TRANSFORMATION KRAS CDC25_UP       | 51  | 0.52288383 | 1.9459264 | 0 | 0.00240224 | 0.29  |
| KIM_HYPOXIA                                               | 25  | 0.6280077  | 1.9447902 | 0 | 0.00242863 | 0.294 |
| BASSO_CD40_SIGNALING_UP                                   | 95  | 0.47140038 | 1.9437336 | 0 | 0.00244727 | 0.297 |
| HAN_SATB1_TARGETS_DN                                      | 388 | 0.39309123 | 1.9433032 | 0 | 0.00245914 | 0.3   |
| VARELA_ZMPSTE24_TARGETS_UP                                | 33  | 0.57706416 | 1.9411925 | 0 | 0.00259793 | 0.315 |
| TARTE_PLASMA_CELL_VS_B_LYMPHOCYTE_UP                      | 70  | 0.5132482  | 1.9407067 | 0 | 0.00260204 | 0.316 |
| KOBAYASHI_EGFR_SIGNALING_6HR_DN                           | 17  | 0.6817885  | 1.9390491 | 0 | 0.00263424 | 0.321 |
| GARGALOVIC_RESPONSE_TO_OXIDIZED_PHOSPHOLIPIDS_BLUE_UP     | 113 | 0.46257815 | 1.9381585 | 0 | 0.00267955 | 0.329 |
| MASRI_RESISTANCE_TO_TAMOXIFEN_AND_AROMATASE_INHIBITORS_DN | 18  | 0.6732063  | 1.9381132 | 0 | 0.00266932 | 0.329 |
| HUANG_FOXA2_TARGETS_DN                                    | 35  | 0.56860894 | 1.9375216 | 0 | 0.00267274 | 0.331 |
| GAUSSMANN_MLL_AF4_FUSION_TARGETS_E_UP                     | 87  | 0.47839585 | 1.9354075 | 0 | 0.00275874 | 0.342 |
| CROONQUIST_IL6_DEPRIVATION_UP                             | 18  | 0.68676776 | 1.931595  | 0 | 0.00287916 | 0.357 |
| UDAYAKUMAR_MED1_TARGETS_DN                                | 213 | 0.4227212  | 1.9299738 | 0 | 0.00296342 | 0.365 |
| YAO_TEMPORAL_RESPONSE_TO_PROGESTERONE_CLUSTER_0           | 64  | 0.50713515 | 1.9287342 | 0 | 0.0029685  | 0.368 |
| WANG_SMARCE1_TARGETS_UP                                   | 257 | 0.41177547 | 1.9278426 | 0 | 0.00299883 | 0.371 |
| ZHU_SKIL_TARGETS_UP                                       | 19  | 0.6618885  | 1.9264426 | 0 | 0.00304822 | 0.378 |
| KRIEG_HYPOXIA_VIA_KDM3A                                   | 47  | 0.5356403  | 1.9259052 | 0 | 0.00303697 | 0.378 |
| COLIN_PILOCYTIC_ASTROCYTOMA_VS_GLIOMASTOMA_UP             | 35  | 0.5826306  | 1.9231495 | 0 | 0.00312612 | 0.384 |
| TAKEDA_TARGETS_OF_NUP98_HOXA9_FUSION_8D_DN                | 187 | 0.42388752 | 1.9225972 | 0 | 0.00312812 | 0.386 |
| JOHNSTONE_PARVB_TARGETS_2_UP                              | 128 | 0.44282743 | 1.9219594 | 0 | 0.00313677 | 0.388 |
| KAMIKUBO_MYELOID_CEBPA_NETWORK                            | 28  | 0.5847725  | 1.9178246 | 0 | 0.00329203 | 0.404 |
| ZHANG_ANTIVIRAL_RESPONSE_TO_RIBAVIRIN_DN                  | 49  | 0.52651215 | 1.9160413 | 0 | 0.00334799 | 0.409 |
| VALK_AML_CLUSTER_1                                        | 27  | 0.6123189  | 1.9097192 | 0 | 0.00356084 | 0.431 |
| SATO_SILENCED_BY_DEACETYLATION_IN_PANCREATIC_CANCER       | 39  | 0.56129223 | 1.9094958 | 0 | 0.00356116 | 0.432 |
| KEEN_RESPONSE_TO_ROSIGLITAZONE_DN                         | 96  | 0.45990992 | 1.9072365 | 0 | 0.00363823 | 0.439 |
| RUTELLA_RESPONSE_TO_CSF2RB_AND_IL4_DN                     | 279 | 0.3982899  | 1.9066362 | 0 | 0.00364462 | 0.44  |
| MCLACHLAN_DENTAL_CARIES_DN                                | 212 | 0.4109084  | 1.9061468 | 0 | 0.00365102 | 0.442 |
| ZHANG_TLX_TARGETS_DN                                      | 101 | 0.46249628 | 1.9058076 | 0 | 0.00364439 | 0.442 |
| SHIPP_DLCL_CURED_VS_FATAL_UP                              | 36  | 0.56545323 | 1.9036877 | 0 | 0.003714   | 0.45  |
| TURASHVILI_BREAST_DUCTAL_CARCINOMA_VS_DUCTAL_NORMAL_DN    | 171 | 0.42525798 | 1.9033211 | 0 | 0.00372005 | 0.452 |
| SHAFFER_IRF4_MULTIPLE_MYELOMA_PROGRAM                     | 34  | 0.575149   | 1.9023038 | 0 | 0.00373885 | 0.453 |
| SHI_SPARC_TARGETS_UP                                      | 19  | 0.6646466  | 1.9023037 | 0 | 0.00372587 | 0.453 |
| RUTELLA_RESPONSE_TO_HGF_VS_CSF2RB_AND_IL4_UP              | 369 | 0.38540825 | 1.9022584 | 0 | 0.00371298 | 0.453 |
| SESTO_RESPONSE_TO_UV_C2                                   | 49  | 0.52365005 | 1.9012889 | 0 | 0.00374419 | 0.456 |
| YAO_TEMPORAL_RESPONSE_TO_PROGESTERONE_CLUSTER_9           | 69  | 0.49193606 | 1.9009347 | 0 | 0.00373132 | 0.456 |
| WIERENGA_STAT5A_TARGETS_GROUP2                            | 52  | 0.5148417  | 1.900458  | 0 | 0.00375697 | 0.461 |
| KANNAN_TP53_TARGETS_UP                                    | 51  | 0.5145272  | 1.8999307 | 0 | 0.00376877 | 0.462 |
| HUPER_BREAST_BASAL_VS_LUMINAL_DN                          | 56  | 0.51786244 | 1.8994962 | 0 | 0.0037867  | 0.464 |
| KUROZUMI_RESPONSE_TO_ONCOCYTIC_VIRUS                      | 42  | 0.5588002  | 1.8992407 | 0 | 0.00378651 | 0.466 |
| DAZARD_UV_RESPONSE_CLUSTER_G24                            | 23  | 0.6236934  | 1.8987294 | 0 | 0.00377949 | 0.468 |
| LIANG_SILENCED_BY_METHYLATION_UP                          | 28  | 0.60919267 | 1.8987018 | 0 | 0.00376681 | 0.468 |
| BURTON_ADIPOGENESIS_7                                     | 47  | 0.53179264 | 1.8959558 | 0 | 0.0038894  | 0.481 |
| LIAN_LIPA_TARGETS_3M                                      | 51  | 0.5290932  | 1.8945222 | 0 | 0.00393127 | 0.487 |
| ZHU_CMV_ALL_UP                                            | 109 | 0.45408612 | 1.8933651 | 0 | 0.00396062 | 0.493 |
| GAURNIER_PSMD4_TARGETS                                    | 65  | 0.49136373 | 1.8916713 | 0 | 0.00402011 | 0.501 |
| DIRMEIER_LMP1_RESPONSE_LATE_UP                            | 53  | 0.5231013  | 1.8903768 | 0 | 0.00403069 | 0.503 |
| NAKAMURA_ADIPOGENESIS_LATE_DN                             | 35  | 0.5693909  | 1.8903453 | 0 | 0.00402346 | 0.504 |
| KONDO_EZH2_TARGETS                                        | 207 | 0.4107946  | 1.8882061 | 0 | 0.00411204 | 0.514 |
| RHEIN_ALL_GLUCOCORTICOID_THERAPY_UP                       | 72  | 0.48080143 | 1.88813   | 0 | 0.00410458 | 0.514 |
| SIMBULAN_PARP1_TARGETS_UP                                 | 31  | 0.5859395  | 1.8852761 | 0 | 0.00420194 | 0.526 |
| HOELZEL_NF1_TARGETS_UP                                    | 126 | 0.43284187 | 1.8847744 | 0 | 0.00419986 | 0.528 |
| UZONYI_RESPONSE_TO_LEUKOTRIENE_AND_THROMBIN               | 33  | 0.5772855  | 1.8818935 | 0 | 0.0043154  | 0.541 |
| KANG_FLUOROURACIL_RESISTANCE_DN                           | 16  | 0.6843564  | 1.8771547 | 0 | 0.00447558 | 0.554 |
| DURCHDEWALD_SKIN_CARCINOGENESIS_DN                        | 245 | 0.404865   | 1.8768895 | 0 | 0.00447298 | 0.555 |
| FLOTHO_PEDIATRIC_ALL_THERAPY_RESPONSE_UP                  | 49  | 0.51034844 | 1.8728436 | 0 | 0.00462601 | 0.568 |
| RODRIGUES_NTN1_AND_DCC_TARGETS                            | 33  | 0.553128   | 1.8720227 | 0 | 0.00468093 | 0.573 |
| HERNANDEZ_ABERRANT_MITOSIS_BY_DOCETACEL_4NM_UP            | 21  | 0.6294028  | 1.8693895 | 0 | 0.00475262 | 0.576 |
| JIANG_HYPOXIA_NORMAL                                      | 270 | 0.39001337 | 1.867414  | 0 | 0.00483227 | 0.584 |
| SABATES_COLORECTAL_ADENOMA_UP                             | 122 | 0.4376493  | 1.8669246 | 0 | 0.004874   | 0.589 |
| SENESE_HDAC1_TARGETS_UP                                   | 404 | 0.3818454  | 1.8657364 | 0 | 0.00492612 | 0.594 |
| ENK_UV_RESPONSE_EPIDERMIS_DN                              | 469 | 0.36848062 | 1.8511347 | 0 | 0.00578922 | 0.663 |
| SHAFFER_IRF4_TARGETS_IN_MYELOMA_VS_MATURE_B_LYMPHOCYTE    | 94  | 0.45090365 | 1.84945   | 0 | 0.00586087 | 0.668 |
| ZHAN_MULTIPLE_MYELOMA_SPIKED                              | 20  | 0.63044727 | 1.8480431 | 0 | 0.00592056 | 0.671 |

|                                             |     |            |           |   |            |       |
|---------------------------------------------|-----|------------|-----------|---|------------|-------|
| HALMOS_CEBPA_TARGETS_UP                     | 48  | 0.52241695 | 1.8464257 | 0 | 0.00597432 | 0.674 |
| ZUCCHI_METASTASIS_DN                        | 41  | 0.52521807 | 1.842619  | 0 | 0.00612501 | 0.687 |
| BOYLAN_MULTIPLE_MYELOMA_C_D_DN              | 234 | 0.39351627 | 1.8422823 | 0 | 0.0061065  | 0.687 |
| LI_INDUCED_T_TO_NATURAL_KILLER_UP           | 271 | 0.3805934  | 1.8412971 | 0 | 0.00612436 | 0.688 |
| KIM_WT1_TARGETS_12HR_UP                     | 150 | 0.41807562 | 1.8334445 | 0 | 0.00648202 | 0.711 |
| RODWELL_AGING_KIDNEY_UP                     | 389 | 0.37661025 | 1.8334434 | 0 | 0.00646273 | 0.711 |
| NELSON_RESPONSE_TO_ANDROGEN_UP              | 79  | 0.462562   | 1.8320613 | 0 | 0.00656677 | 0.718 |
| ODONNELL_TFRC_TARGETS_UP                    | 352 | 0.3747915  | 1.8314958 | 0 | 0.00661083 | 0.723 |
| BOQUEST_STEM_CELL_DN                        | 196 | 0.41099593 | 1.8312603 | 0 | 0.00659686 | 0.723 |
| ZHANG_PROLIFERATING_VS_QUIESCENT            | 48  | 0.51036894 | 1.8279369 | 0 | 0.00680812 | 0.736 |
| MARSON_FOXP3_TARGETS_UP                     | 61  | 0.49053493 | 1.8229271 | 0 | 0.00722576 | 0.759 |
| MIKKELSEN_IPS_LCP_WITH_H3K4ME3              | 138 | 0.42365956 | 1.8200542 | 0 | 0.00745852 | 0.774 |
| DAUER_STAT3_TARGETS_UP                      | 48  | 0.5049943  | 1.8193879 | 0 | 0.00747881 | 0.777 |
| LUI_THYROID_CANCER_PAX8_PPARG_DN            | 40  | 0.5250976  | 1.8192827 | 0 | 0.00747311 | 0.778 |
| GERHOLD_ADIPOGENESIS_UP                     | 47  | 0.5116582  | 1.8181173 | 0 | 0.00755058 | 0.785 |
| CHIANG_LIVER_CANCER_SUBCLASS_CTNNB1_DN      | 158 | 0.40281656 | 1.8180399 | 0 | 0.00753406 | 0.785 |
| HELLER_SILENCED_BY_METHYLATION_UP           | 241 | 0.380628   | 1.8172942 | 0 | 0.00755889 | 0.786 |
| ROZANOV_MMP14_TARGETS_UP                    | 235 | 0.39518848 | 1.81338   | 0 | 0.00785708 | 0.797 |
| HAMAI_APOPTOSIS_VIA_TRAIL_DN                | 157 | 0.40910867 | 1.8121814 | 0 | 0.0079527  | 0.802 |
| RICKMAN_METASTASIS_DN                       | 220 | 0.39010432 | 1.8114494 | 0 | 0.00798201 | 0.803 |
| CREIGHTON_ENDOCRINE_THERAPY_RESISTANCE_5    | 415 | 0.36370927 | 1.8111323 | 0 | 0.00796769 | 0.804 |
| BOSCO_EPITHELIAL_DIFFERENTIATION_MODULE     | 57  | 0.48840672 | 1.8095852 | 0 | 0.00801947 | 0.808 |
| RODWELL_AGING_KIDNEY_NO_BLOOD_UP            | 189 | 0.39983752 | 1.8094743 | 0 | 0.00799706 | 0.808 |
| MOHANKUMAR_TLX1_TARGETS_DN                  | 148 | 0.41625112 | 1.8093094 | 0 | 0.00798494 | 0.808 |
| WIERENGA_STAT5A_TARGETS_GROUP1              | 123 | 0.42571118 | 1.8079717 | 0 | 0.00809968 | 0.813 |
| KIM_WT1_TARGETS_8HR_UP                      | 152 | 0.41703564 | 1.8048623 | 0 | 0.00841332 | 0.829 |
| PASQUALUCCI_LYMPHOMA_BY_GC_STAGE_UP         | 249 | 0.38748294 | 1.8046322 | 0 | 0.00840512 | 0.829 |
| GENTILE_UV_RESPONSE_CLUSTER_D1              | 15  | 0.6672005  | 1.804353  | 0 | 0.008417   | 0.829 |
| WALLACE_PROSTATE_CANCER_RACE_UP             | 254 | 0.37997952 | 1.8042047 | 0 | 0.00842397 | 0.83  |
| FRIDMAN_SENESCENCE_UP                       | 72  | 0.46384263 | 1.8001966 | 0 | 0.00886337 | 0.848 |
| MIYAGAWA_TARGETS_OF_EWSR1_ETS_FUSIONS_DN    | 200 | 0.3906223  | 1.7980844 | 0 | 0.00900279 | 0.857 |
| DAZARD_RESPONSE_TO_UV_NHEK_UP               | 206 | 0.39718166 | 1.7972139 | 0 | 0.00906325 | 0.863 |
| MEISSNER_BRAIN_HCP_WITH_H3K27ME3            | 230 | 0.3862834  | 1.7925822 | 0 | 0.00944918 | 0.871 |
| SARTIPY_NORMAL_AT_INSULIN_RESISTANCE_UP     | 29  | 0.55813557 | 1.7903569 | 0 | 0.00962101 | 0.88  |
| VART_KSHV_INFECTION_ANGIOGENIC_MARKERS_UP   | 151 | 0.40152422 | 1.7892222 | 0 | 0.00970127 | 0.882 |
| DOANE_BREAST_CANCER_ESR1_DN                 | 46  | 0.49843454 | 1.7816455 | 0 | 0.01033755 | 0.895 |
| JACKSON_DNMT1_TARGETS_UP                    | 74  | 0.45492205 | 1.7809939 | 0 | 0.01036295 | 0.895 |
| PEDRIOLI_MIR31_TARGETS_DN                   | 352 | 0.36424163 | 1.7804803 | 0 | 0.01038337 | 0.895 |
| MIKKELSEN_ES_ICP_WITH_H3K4ME3_AND_H3K27ME3  | 122 | 0.4121545  | 1.7797878 | 0 | 0.01041761 | 0.898 |
| RUTELLA_RESPONSE_TO_HGF_DN                  | 204 | 0.38831687 | 1.777896  | 0 | 0.01059737 | 0.903 |
| NIKOLSKY_BREAST_CANCER_16P13_AMPLICON       | 88  | 0.4296887  | 1.7702454 | 0 | 0.01137857 | 0.919 |
| SCHUETZ_BREAST_CANCER_DUCTAL_INVASIVE_UP    | 320 | 0.3657695  | 1.7687185 | 0 | 0.01148529 | 0.92  |
| PROVENZANI_METASTASIS_DN                    | 128 | 0.41060555 | 1.7682604 | 0 | 0.0115161  | 0.92  |
| DELACROIX_RARG_BOUND_MEF                    | 326 | 0.36432493 | 1.7660683 | 0 | 0.01168961 | 0.926 |
| RODRIGUES_DCC_TARGETS_DN                    | 114 | 0.4080086  | 1.7618289 | 0 | 0.01214431 | 0.934 |
| NGUYEN_NOTCH1_TARGETS_DN                    | 82  | 0.44284293 | 1.7612338 | 0 | 0.01215985 | 0.935 |
| PETROVA_PROX1_TARGETS_DN                    | 62  | 0.46359366 | 1.7573742 | 0 | 0.01263892 | 0.939 |
| GERY_CEBP_TARGETS                           | 113 | 0.41698998 | 1.7568789 | 0 | 0.01267095 | 0.94  |
| OZEN_MIR125B1_TARGETS                       | 23  | 0.57663846 | 1.7567352 | 0 | 0.01265272 | 0.94  |
| MARKEY_RB1_CHRONIC_LOF_DN                   | 108 | 0.41638002 | 1.7545104 | 0 | 0.01290796 | 0.942 |
| BROWNE_HCMV_INFECTION_24HR_DN               | 142 | 0.39798132 | 1.7484194 | 0 | 0.01358277 | 0.947 |
| GU_PDEF_TARGETS_UP                          | 70  | 0.45404163 | 1.7456301 | 0 | 0.01394987 | 0.951 |
| SUNG_METASTASIS_STROMA_UP                   | 98  | 0.42152965 | 1.7454644 | 0 | 0.01392433 | 0.951 |
| SWEET_LUNG_CANCER_KRAS_UP                   | 436 | 0.34850794 | 1.7448065 | 0 | 0.01392818 | 0.954 |
| RUTELLA_RESPONSE_TO_CSF2RB_AND_IL4_UP       | 307 | 0.35809335 | 1.7447242 | 0 | 0.01390317 | 0.955 |
| RUTELLA_RESPONSE_TO_HGF_UP                  | 382 | 0.35773692 | 1.7446781 | 0 | 0.01387373 | 0.955 |
| AIYAR_COBRA1_TARGETS_UP                     | 34  | 0.51786506 | 1.743565  | 0 | 0.0140039  | 0.955 |
| LU_IL4_SIGNALING                            | 83  | 0.4446212  | 1.7420801 | 0 | 0.01414346 | 0.956 |
| MIKKELSEN_MCV6_LCP_WITH_H3K4ME3             | 135 | 0.39396024 | 1.7363586 | 0 | 0.01483495 | 0.964 |
| MIKKELSEN_MCV6_HCP_WITH_H3K27ME3            | 379 | 0.35481042 | 1.734133  | 0 | 0.0151978  | 0.964 |
| LIU_SMARCA4_TARGETS                         | 56  | 0.4700165  | 1.7318242 | 0 | 0.01555814 | 0.969 |
| FOSTER_TOLERANT_MACROPHAGE_DN               | 375 | 0.36067533 | 1.7311611 | 0 | 0.0155945  | 0.969 |
| LINDSTEDT_DENDRITIC_CELL_MATURATION_D       | 64  | 0.44555482 | 1.7246345 | 0 | 0.01631092 | 0.977 |
| TAKEDA_TARGETS_OF_NUP98_HOXA9_FUSION_16D_DN | 122 | 0.3986664  | 1.7235703 | 0 | 0.016448   | 0.977 |
| MIKKELSEN_MEF_ICP_WITH_H3K27ME3             | 174 | 0.38392603 | 1.7215083 | 0 | 0.0166382  | 0.979 |
| SEIDEN_ONCOGENESIS_BY_MET                   | 73  | 0.43595198 | 1.7209694 | 0 | 0.0166677  | 0.979 |
| MAHAJAN_RESPONSE_TO_IL1A_UP                 | 72  | 0.43913034 | 1.7169604 | 0 | 0.01711555 | 0.984 |
| CROONQUIST_STROMAL_STIMULATION_UP           | 55  | 0.46441978 | 1.7100855 | 0 | 0.01799421 | 0.99  |
| LEE_AGING_CEREBELLUM_UP                     | 79  | 0.43446174 | 1.7100035 | 0 | 0.01796162 | 0.99  |
| LABBE_TARGETS_OF_TGFB1_AND_WNT3A_DN         | 101 | 0.4103484  | 1.7081703 | 0 | 0.018172   | 0.991 |
| ZHOU_INFLAMMATORY_RESPONSE_LIVE_UP          | 403 | 0.34533456 | 1.7053957 | 0 | 0.01855946 | 0.991 |
| YAMAZAKI_TCEB3_TARGETS_UP                   | 162 | 0.382906   | 1.7032243 | 0 | 0.01883296 | 0.993 |
| ZHU_CMV_24_HR_UP                            | 84  | 0.42390466 | 1.702512  | 0 | 0.01880998 | 0.994 |
| SMID_BREAST_CANCER_ERBB2_UP                 | 126 | 0.40805548 | 1.6981335 | 0 | 0.019285   | 0.995 |
| MIKKELSEN_ES_LCP_WITH_H3K4ME3               | 104 | 0.4099487  | 1.6961373 | 0 | 0.01963018 | 0.996 |
| MCBRYAN_PUBERTAL_TGFB1_TARGETS_UP           | 158 | 0.38415012 | 1.6942147 | 0 | 0.01990967 | 0.996 |
| GAUSSMANN_MLL_AF4_FUSION_TARGETS_F_UP       | 173 | 0.3738722  | 1.6938238 | 0 | 0.01994576 | 0.996 |
| KATSANOUE_ELAVL1_TARGETS_UP                 | 146 | 0.38730845 | 1.6936909 | 0 | 0.01992191 | 0.996 |
| AMIT_EGF_RESPONSE_40_HELA                   | 40  | 0.49558422 | 1.692931  | 0 | 0.02000906 | 0.996 |

|                                                   |     |            |           |            |            |       |
|---------------------------------------------------|-----|------------|-----------|------------|------------|-------|
| EBAUER_MYOGENIC_TARGETS_OF_PAX3_FOXO1_FUSION      | 47  | 0.47067192 | 1.6898121 | 0          | 0.02049507 | 0.997 |
| MIKKELSEN_IPS_ICP_WITH_H3K4ME3_AND_H327ME3        | 111 | 0.3936109  | 1.6801516 | 0          | 0.02194334 | 0.999 |
| PHONG_TNF_RESPONSE_VIA_P38_COMPLETE               | 207 | 0.36144    | 1.679394  | 0          | 0.02201264 | 0.999 |
| BOQUEST_STEM_CELL_CULTURED_VS_FRESH_UP            | 392 | 0.3469815  | 1.6780163 | 0          | 0.02224747 | 1     |
| MIKKELSEN_NPC_HCP_WITH_H3K4ME3_AND_H3K27ME3       | 193 | 0.36477983 | 1.677398  | 0          | 0.02227323 | 1     |
| ZHOU_INFLAMMATORY_RESPONSE_FIMA_UP                | 439 | 0.33612224 | 1.676561  | 0          | 0.02237647 | 1     |
| ZHONG_RESPONSE_TO_AZACITIDINE_AND_TSA_UP          | 162 | 0.37703043 | 1.6704885 | 0          | 0.02333745 | 1     |
| IZADPANAH_STEM_CELL_ADIPOSE_VS_BONE_UP            | 111 | 0.39430612 | 1.6641691 | 0          | 0.02422028 | 1     |
| COLDREN_GEFITINIB_RESISTANCE_DN                   | 203 | 0.3608997  | 1.6612732 | 0          | 0.02469966 | 1     |
| PEDERSEN_METASTASIS_BY_ERBB2_ISOFORM_4            | 97  | 0.3979033  | 1.6612592 | 0          | 0.02465284 | 1     |
| LIEN_BREAST_CARCINOMA_METAPLASTIC_VS_DUCTAL_UP    | 79  | 0.4169679  | 1.6530565 | 0          | 0.02630167 | 1     |
| OSWALD_HEMATOPOIETIC_STEM_CELL_IN_COLLAGEN_GEL_UP | 216 | 0.35148346 | 1.6524945 | 0          | 0.02637436 | 1     |
| PUIFFE_INVASION_INHIBITED_BY_ASCITES_DN           | 129 | 0.38297975 | 1.6510109 | 0          | 0.02641052 | 1     |
| KUMAR_TARGETS_OF_MLL_AF9_FUSION                   | 361 | 0.33702624 | 1.6479326 | 0          | 0.02694202 | 1     |
| RUTELLA_RESPONSE_TO_HGF_VS_CSF2RB_AND_IL4_DN      | 217 | 0.35251418 | 1.6454536 | 0          | 0.02735085 | 1     |
| MCBRYAN_PUBERTAL_TGFB1_TARGETS_DN                 | 59  | 0.43839237 | 1.6406476 | 0          | 0.02805567 | 1     |
| CHEN_HOXA5_TARGETS_9HR_UP                         | 190 | 0.35780206 | 1.636711  | 0          | 0.02878724 | 1     |
| ICHIBA_GRAFT_VERSUS_HOST_DISEASE_35D_UP           | 113 | 0.37432212 | 1.633559  | 0          | 0.029479   | 1     |
| VERHAAC_AML_WITH_NPM1_MUTATED_DN                  | 227 | 0.35016093 | 1.6312859 | 0          | 0.0298158  | 1     |
| ENK_UV_RESPONSE_EPIDERMIS_UP                      | 262 | 0.34131807 | 1.6297351 | 0          | 0.03009978 | 1     |
| HELLER_HDAC_TARGETS_SILENCED_BY_METHYLATION_DN    | 242 | 0.34995103 | 1.6269009 | 0          | 0.03074262 | 1     |
| WOO_LIVER_CANCER_RECURRENCE_UP                    | 95  | 0.39067492 | 1.6259261 | 0          | 0.03085467 | 1     |
| LEI_MYB_TARGETS                                   | 298 | 0.34088463 | 1.6240857 | 0          | 0.03112832 | 1     |
| QI_PLASMACYTOMA_UP                                | 242 | 0.34661818 | 1.6208524 | 0          | 0.0318632  | 1     |
| CAIRO_HEPATOBLASTOMA_CLASSES_DN                   | 196 | 0.35224393 | 1.6182678 | 0          | 0.0324176  | 1     |
| ZHENG_FOXP3_TARGETS_IN_THYMUS_UP                  | 169 | 0.3560929  | 1.615141  | 0          | 0.03308638 | 1     |
| KRIEG_KDM3A_TARGETS_NOT_HYPOXIA                   | 155 | 0.36432934 | 1.614318  | 0          | 0.03324526 | 1     |
| MCBRYAN_PUBERTAL_BREAST_3_4WK_UP                  | 198 | 0.3540096  | 1.6140305 | 0          | 0.03318576 | 1     |
| ENK_UV_RESPONSE_KERATINOCYTE_UP                   | 486 | 0.32137257 | 1.6132483 | 0          | 0.0332857  | 1     |
| WANG_CISPLATIN_RESPONSE_AND_XPC_DN                | 202 | 0.350754   | 1.6125183 | 0          | 0.03336789 | 1     |
| TONKS_TARGETS_OF_RUNX1_RUNX1T1_FUSION_MONOCYTE_UP | 180 | 0.35751548 | 1.6100593 | 0          | 0.03379717 | 1     |
| TARTE_PLASMA_CELL_VS_PLASMABLAST_UP               | 346 | 0.33152664 | 1.6097654 | 0          | 0.03381904 | 1     |
| AMUNDSON_RESPONSE_TO_ARSENITE                     | 201 | 0.3534896  | 1.60512   | 0          | 0.03474396 | 1     |
| LI_AMPLIFIED_IN_LUNG_CANCER                       | 160 | 0.36024824 | 1.6018705 | 0          | 0.03550741 | 1     |
| MCBRYAN_PUBERTAL_BREAST_4_5WK_UP                  | 250 | 0.34352234 | 1.5995709 | 0          | 0.03587901 | 1     |
| ZWANG_EGF_INTERVAL_DN                             | 177 | 0.35355955 | 1.5994161 | 0          | 0.03578333 | 1     |
| NAKAMURA_ADIPOGENESIS_EARLY_UP                    | 56  | 0.42554766 | 1.5948893 | 0          | 0.03689506 | 1     |
| ZHANG_TLX_TARGETS_60HR_UP                         | 269 | 0.33458057 | 1.5948154 | 0          | 0.03684596 | 1     |
| MARTORIATI_MDM4_TARGETS_NEUROEPITHELIUM_UP        | 149 | 0.36611125 | 1.5919391 | 0          | 0.03742456 | 1     |
| MARTORIATI_MDM4_TARGETS_FETAL_LIVER_UP            | 192 | 0.34710225 | 1.5910119 | 0          | 0.03767025 | 1     |
| DEURIG_T_CELL_PROLYMPHOCYTIC_LEUKEMIA_DN          | 278 | 0.331391   | 1.5879012 | 0          | 0.0381689  | 1     |
| DOUGLAS_BMI1_TARGETS_DN                           | 282 | 0.3361515  | 1.5823976 | 0          | 0.03960861 | 1     |
| BOSCO_ALLERGEN_INDUCED_TH2_ASSOCIATED_MODULE      | 131 | 0.36354494 | 1.5710701 | 0          | 0.04257761 | 1     |
| KIM_WT1_TARGETS_12HR_DN                           | 181 | 0.34429288 | 1.564863  | 0          | 0.04417183 | 1     |
| HAN_SATB1_TARGETS_UP                              | 340 | 0.31759694 | 1.5598435 | 0          | 0.04557367 | 1     |
| OKUMURA_INFLAMMATORY_RESPONSE_LPS                 | 164 | 0.34593594 | 1.5508168 | 0          | 0.04832399 | 1     |
| LU_EZH2_TARGETS_UP                                | 218 | 0.33790436 | 1.54916   | 0          | 0.04871538 | 1     |
| WANG_LMO4_TARGETS_DN                              | 303 | 0.31903937 | 1.5475632 | 0          | 0.04903748 | 1     |
| GRAESSMANN_APOPTOSIS_BY_SERUM_DEPRIVATION_UP      | 475 | 0.3107231  | 1.5351479 | 0          | 0.05292661 | 1     |
| GARY_CD5_TARGETS_UP                               | 424 | 0.31072634 | 1.526542  | 0          | 0.05533378 | 1     |
| POTTI_TOPOTECAN_SENSITIVITY                       | 119 | 0.35638547 | 1.5246258 | 0          | 0.05561632 | 1     |
| SENGUPTA_NASOPHARYNGEAL_CARCINOMA_WITH_LMP1_UP    | 356 | 0.31423908 | 1.5219445 | 0          | 0.05640493 | 1     |
| ZHANG_TLX_TARGETS_36HR_UP                         | 207 | 0.33179355 | 1.5190939 | 0          | 0.05727606 | 1     |
| SERVITJA_ISLET_HNF1A_TARGETS_UP                   | 153 | 0.34325638 | 1.5190698 | 0          | 0.05719195 | 1     |
| FULCHER_INFLAMMATORY_RESPONSE_LLECTIN_VS_LPS_UP   | 496 | 0.3034031  | 1.5159516 | 0          | 0.05822728 | 1     |
| HOSHIDA_LIVER_CANCER_SUBCLASS_S1                  | 214 | 0.32679465 | 1.5145528 | 0          | 0.05855142 | 1     |
| KIM_GLIS2_TARGETS_UP                              | 80  | 0.38137192 | 1.4949799 | 0          | 0.06579723 | 1     |
| RAY_TUMORIGENESIS_BY_ERBB2_CDC25A_DN              | 142 | 0.3418597  | 1.4917732 | 0          | 0.06731953 | 1     |
| MIYAGAWA_TARGETS_OF_EWSR1_ETS_FUSIONS_UP          | 226 | 0.31529263 | 1.4741755 | 0          | 0.07365949 | 1     |
| WANG_RESPONSE_TO_GSK3_INHIBITOR_SB216763_UP       | 304 | 0.30912468 | 1.4655021 | 0          | 0.07717134 | 1     |
| FOSTER_KDM1A_TARGETS_UP                           | 236 | 0.31094024 | 1.465135  | 0          | 0.07727158 | 1     |
| THUM_SYSTOLIC_HEART_FAILURE_UP                    | 371 | 0.29941317 | 1.4572192 | 0          | 0.08055622 | 1     |
| LU_AGING_BRAIN_UP                                 | 247 | 0.30424228 | 1.424873  | 0          | 0.09606776 | 1     |
| LI_WILMS_TUMOR_VS_FETAL_KIDNEY_1_UP               | 168 | 0.31358457 | 1.423426  | 0          | 0.09679796 | 1     |
| GRUETZMANN_PANCREATIC_CANCER_UP                   | 332 | 0.29504415 | 1.4211311 | 0          | 0.09796382 | 1     |
| BRUINS_UVC_RESPONSE_VIA_TP53_GROUP_B              | 477 | 0.28138337 | 1.417232  | 0          | 0.09990516 | 1     |
| SMID_BREAST_CANCER_NORMAL_LIKE_UP                 | 416 | 0.28390896 | 1.4149281 | 0          | 0.10119931 | 1     |
| YAGI_AML_FAB_MARKERS                              | 175 | 0.31392834 | 1.4138684 | 0          | 0.10170098 | 1     |
| ACEVEDO_FGFR1_TARGETS_IN_PROSTATE_CANCER_MODEL_UP | 263 | 0.29669416 | 1.4086735 | 0          | 0.10435177 | 1     |
| FLECHNER_BIOPSY_KIDNEY_TRANSPLANT_OK_VS_DONOR_UP  | 497 | 0.27928284 | 1.4084964 | 0          | 0.10432083 | 1     |
| JAATINEN_HEMATOPOIETIC_STEM_CELL_DN               | 202 | 0.30008328 | 1.3885592 | 0          | 0.1150326  | 1     |
| LIU_PROSTATE_CANCER_DN                            | 424 | 0.27535006 | 1.379217  | 0          | 0.12003058 | 1     |
| LIM_MAMMARY_STEM_CELL_UP                          | 435 | 0.27335915 | 1.3760084 | 0          | 0.1217685  | 1     |
| LINDGREN_BLADDER_CANCER_CLUSTER_2B                | 345 | 0.28103662 | 1.3543286 | 0          | 0.13531648 | 1     |
| ROME_INSULIN_TARGETS_IN_MUSCLE_UP                 | 386 | 0.2647506  | 1.3239609 | 0          | 0.15418062 | 1     |
| CHARAFE_BREAST_CANCER_LUMINAL_VS_MESENCHYMAL_DN   | 423 | 0.26380327 | 1.3112075 | 0          | 0.1632071  | 1     |
| MEISSNER_NPC_HCP_WITH_H3_UNMETHYLATED             | 452 | 0.26132706 | 1.2944905 | 0          | 0.17473085 | 1     |
| MILI_PSEUDOPODIA_CHEMOTAXIS_DN                    | 421 | 0.25186345 | 1.2479762 | 0          | 0.21201335 | 1     |
| HAHTOLA_MYCOSIS_FUNGOIDES_UP                      | 17  | 0.6726459  | 1.8867761 | 0.00215983 | 0.00415029 | 0.52  |

|                                                                   |     |            |           |            |            |       |
|-------------------------------------------------------------------|-----|------------|-----------|------------|------------|-------|
| MARCHINI TRABECTEDIN RESISTANCE_UP                                | 20  | 0.61269593 | 1.8363258 | 0.002331   | 0.00632523 | 0.702 |
| GENTILE UV HIGH DOSE_UP                                           | 21  | 0.65542984 | 1.9294741 | 0.00239234 | 0.00295232 | 0.365 |
| BERENJENO TRANSFORMED_BY_RHOA_FOREVER_UP                          | 18  | 0.6132746  | 1.7394631 | 0.00239808 | 0.01443352 | 0.959 |
| CROONQUIST NRAS SIGNALING_UP                                      | 33  | 0.5385956  | 1.8260608 | 0.00246305 | 0.00698002 | 0.746 |
| HAHTOLA CTCL PATHOGENESIS                                         | 15  | 0.70054823 | 1.875279  | 0.00249377 | 0.00454247 | 0.561 |
| YAO TEMPORAL RESPONSE_TO_PROGESTERONE_CLUSTER_5                   | 27  | 0.60831636 | 1.9166278 | 0.0025     | 0.00334027 | 0.408 |
| AMIT_EGF_RESPONSE_240_MCF10A                                      | 19  | 0.63576466 | 1.8693746 | 0.00250627 | 0.00474355 | 0.577 |
| SABATES COLORECTAL ADENOMA_SIZE_UP                                | 16  | 0.65902615 | 1.8114065 | 0.0025641  | 0.00796449 | 0.803 |
| BRACHAT_RESPONSE_TO_METHOTREXATE_UP                               | 21  | 0.58778685 | 1.7308152 | 0.0025974  | 0.01561361 | 0.969 |
| DORN ADENOVIRUS INFECTION_24HR_DN                                 | 39  | 0.533637   | 1.8511981 | 0.0027027  | 0.0058014  | 0.663 |
| QI_HYPOXIA_TARGETS_OF_HIF1A_AND_FOXA2                             | 36  | 0.5008148  | 1.6693854 | 0.0027248  | 0.02339365 | 1     |
| AMIT_EGF_RESPONSE_120_MCF10A                                      | 35  | 0.59376425 | 2.0052977 | 0.00273224 | 0.00126635 | 0.134 |
| LEIN_ASTROCYTE_MARKERS                                            | 39  | 0.47342682 | 1.6009483 | 0.00274725 | 0.03561037 | 1     |
| DORN ADENOVIRUS INFECTION_12HR_DN                                 | 30  | 0.5225016  | 1.7231358 | 0.00275482 | 0.01645162 | 0.977 |
| FUJII_YBX1_TARGETS_UP                                             | 41  | 0.5091749  | 1.7508453 | 0.00277778 | 0.01328458 | 0.945 |
| SEMENZA_HIF1_TARGETS                                              | 34  | 0.5321995  | 1.7921485 | 0.00280899 | 0.00945163 | 0.874 |
| VALK_AML_CLUSTER_11                                               | 35  | 0.5473861  | 1.8436872 | 0.002849   | 0.00606641 | 0.683 |
| TSUNODA CISPLATIN RESISTANCE_DN                                   | 43  | 0.5028428  | 1.7831688 | 0.00287356 | 0.01022268 | 0.892 |
| WESTON_VEGFA_TARGETS_12HR                                         | 33  | 0.52321786 | 1.7252218 | 0.00290698 | 0.01624975 | 0.976 |
| VANHARANTA UTERINE FIBROID_DN                                     | 60  | 0.45652875 | 1.7062095 | 0.00294118 | 0.01847    | 0.991 |
| BURTON_ADIPOGENESIS_11                                            | 54  | 0.4574923  | 1.644624  | 0.00294985 | 0.02745585 | 1     |
| ZHU_CMV_8_HR_DN                                                   | 51  | 0.48245642 | 1.7669022 | 0.003003   | 0.01162125 | 0.923 |
| LINDVALL_IMMORTALIZED_BY_TERT_DN                                  | 66  | 0.4430834  | 1.7119436 | 0.00306749 | 0.01781322 | 0.99  |
| RAGHAVACHARI_PLATELET_SPECIFIC_GENES                              | 67  | 0.41286546 | 1.595901  | 0.00311527 | 0.03676029 | 1     |
| FERRANDO_T_ALL_WITH_MLL_ENL_FUSION_UP                             | 81  | 0.4127388  | 1.6649524 | 0.003125   | 0.02413693 | 1     |
| HERNANDEZ_ABERRANT_MITOSIS_BY_DOCETACEL_2NM_UP                    | 75  | 0.41532382 | 1.6516917 | 0.003125   | 0.02633067 | 1     |
| MARCHINI TRABECTEDIN RESISTANCE_DN                                | 45  | 0.44180754 | 1.5951059 | 0.003125   | 0.03689576 | 1     |
| NATSUME_RESPONSE_TO_INTERFERON_BETA_UP                            | 66  | 0.42913786 | 1.6524001 | 0.0031746  | 0.02633202 | 1     |
| LIU_VAV3_PROSTATE_CARCINOGENESIS_UP                               | 79  | 0.4168809  | 1.6413951 | 0.0031746  | 0.02792501 | 1     |
| GEORGANTAS_HSC_MARKERS                                            | 61  | 0.41559303 | 1.593062  | 0.00321543 | 0.03723924 | 1     |
| YAO_TEMPORAL_RESPONSE_TO_PROGESTERONE_CLUSTER_6                   | 69  | 0.47334075 | 1.798379  | 0.00322581 | 0.00900272 | 0.854 |
| SWEET_KRAS_TARGETS_UP                                             | 73  | 0.46098393 | 1.7922558 | 0.00322581 | 0.00945793 | 0.873 |
| VANDESLUIS_COMMD1_TARGETS_GROUP_3_UP                              | 81  | 0.40704954 | 1.6500939 | 0.00324675 | 0.0266124  | 1     |
| CHIANG_LIVER_CANCER_SUBCLASS_UNANNOTATED_UP                       | 69  | 0.45476398 | 1.7657294 | 0.00335571 | 0.01171612 | 0.926 |
| HINATA_NFKB_TARGETS_FIBROBLAST_UP                                 | 77  | 0.41464898 | 1.6424421 | 0.00342466 | 0.02777297 | 1     |
| BROWNE_HCMV_INFECTION_6HR_UP                                      | 64  | 0.39607388 | 1.533918  | 0.0034965  | 0.05327864 | 1     |
| FERREIRA_EWINGS_SARCOMA_UNSTABLE_VS_STABLE_DN                     | 80  | 0.4114141  | 1.6385984 | 0.0035461  | 0.02847425 | 1     |
| WANG_HCP_PROSTATE_CANCER                                          | 102 | 0.41591394 | 1.7217637 | 0.00357143 | 0.01662163 | 0.978 |
| DIAZ_CHRONIC_MEYLOGENOUS_LEUKEMIA_DN                              | 107 | 0.36871907 | 1.5328591 | 0.00363636 | 0.05362454 | 1     |
| BHAT_ESR1_TARGETS_NOT_VIA_AKT1_DN                                 | 80  | 0.41613108 | 1.6750314 | 0.00367647 | 0.02260645 | 1     |
| RICKMAN_HEAD_AND_NECK_CANCER_C                                    | 93  | 0.36558768 | 1.4992516 | 0.00371747 | 0.06425785 | 1     |
| BIDUS_METASTASIS_DN                                               | 138 | 0.37899452 | 1.6520709 | 0.00373134 | 0.02627716 | 1     |
| CHIARADONNA_NEOPLASTIC_TRANSFORMATION_CDC25_UP                    | 114 | 0.3647159  | 1.5371522 | 0.00378788 | 0.05246627 | 1     |
| WESTON_VEGFA_TARGETS                                              | 102 | 0.3555222  | 1.5040717 | 0.00378788 | 0.06278529 | 1     |
| CHIARADONNA_NEOPLASTIC_TRANSFORMATION_CDC25_DN                    | 137 | 0.34814617 | 1.4879256 | 0.00395257 | 0.06884542 | 1     |
| LENAOUR_DENDRITIC_CELL_MATURATION_DN                              | 124 | 0.3945892  | 1.6800978 | 0.00406504 | 0.02190404 | 0.999 |
| NING_CHRONIC_OBSTRUCTIVE_PULMONARY_DISEASE_DN                     | 112 | 0.3506723  | 1.4771096 | 0.00406504 | 0.07257526 | 1     |
| ZHU_CMV_ALL_DN                                                    | 123 | 0.36961192 | 1.5708838 | 0.00413223 | 0.04254561 | 1     |
| QI_HYPOXIA                                                        | 123 | 0.38388836 | 1.6312304 | 0.00414938 | 0.0297619  | 1     |
| HUANG_GATA2_TARGETS_UP                                            | 132 | 0.37487555 | 1.6419796 | 0.00416667 | 0.02785023 | 1     |
| BERTUCCI_MEDULLARY_VS_DUCTAL_BREAST_CANCER_DN                     | 145 | 0.3420962  | 1.5010399 | 0.00420168 | 0.06369738 | 1     |
| UEDA_PERIFERAL_CLOCK                                              | 156 | 0.3324667  | 1.4709073 | 0.00429185 | 0.07504998 | 1     |
| TSAI_RESPONSE_TO_IONIZING_RADIATION                               | 137 | 0.33990332 | 1.4822073 | 0.00448431 | 0.07106648 | 1     |
| SUH_COEXPRESSED_WITH_ID1_AND_ID2_UP                               | 17  | 0.6277041  | 1.7736723 | 0.00453515 | 0.01103277 | 0.908 |
| MCCABE_HOXC6_TARGETS_CANCER_DN                                    | 19  | 0.61334556 | 1.7529969 | 0.00478469 | 0.01309723 | 0.943 |
| SARTIPY_BLUNTED_BY_INSULIN_RESISTANCE_UP                          | 17  | 0.64662397 | 1.8105365 | 0.00479616 | 0.0079964  | 0.807 |
| BOYAULT_LIVER_CANCER_SUBCLASS_G56_DN                              | 16  | 0.6749321  | 1.842161  | 0.00483092 | 0.00609906 | 0.687 |
| AMIT_DELAYED_EARLY_GENES                                          | 18  | 0.67319995 | 1.9108648 | 0.00488998 | 0.00349395 | 0.423 |
| XU_RESPONSE_TO_TRETINOIN_AND_NSC682994_UP                         | 16  | 0.6447384  | 1.8135104 | 0.00490196 | 0.00787953 | 0.797 |
| DUTTA_APOPTOSIS_VIA_NFKB                                          | 31  | 0.5510462  | 1.7970382 | 0.00492611 | 0.00904864 | 0.864 |
| MAHADEVAN_IMATINIB_RESISTANCE_UP                                  | 18  | 0.61488396 | 1.7089239 | 0.00493827 | 0.01807791 | 0.99  |
| BANDRES_RESPONSE_TO_CARMUSTIN_MGMT_48HR_DN                        | 153 | 0.332408   | 1.4612693 | 0.00497512 | 0.07894015 | 1     |
| SESTO_RESPONSE_TO_UV_C3                                           | 20  | 0.64466506 | 1.8559175 | 0.005      | 0.00545844 | 0.634 |
| CHEOK_RESPONSE_TO_HD_MTX_UP                                       | 17  | 0.6210071  | 1.719318  | 0.005      | 0.0168391  | 0.982 |
| MAHADEVAN_RESPONSE_TO_MP470_UP                                    | 19  | 0.6588646  | 1.8760142 | 0.00501253 | 0.00453376 | 0.56  |
| XU_HGF_TARGETS_INDUCED_BY_AKT1_6HR                                | 19  | 0.6250035  | 1.8582408 | 0.00501253 | 0.00536839 | 0.626 |
| DAZARD_UV_RESPONSE_CLUSTER_G28                                    | 20  | 0.60569835 | 1.8266321 | 0.00512821 | 0.00693074 | 0.74  |
| BURTON_ADIPOGENESIS_PEAK_AT_8HR                                   | 32  | 0.49159408 | 1.6427959 | 0.00519481 | 0.02774859 | 1     |
| ZHANG_ANTIVIRAL_RESPONSE_TO_RIBAVIRIN_UP                          | 26  | 0.5674382  | 1.7900693 | 0.00527705 | 0.00960973 | 0.881 |
| HOFMANN_MYELODYSPLASTIC_SYNDROM_LOW_RISK_DN                       | 27  | 0.60372406 | 1.951732  | 0.00530504 | 0.00222335 | 0.263 |
| WANG_BARRETTES_ESOPHAGUS_UP                                       | 40  | 0.52079517 | 1.7589728 | 0.00537634 | 0.0124469  | 0.937 |
| SIMBULAN_UV_RESPONSE_NORMAL_DN                                    | 31  | 0.5009406  | 1.6669055 | 0.00547945 | 0.02380073 | 1     |
| VALK_AML_CLUSTER_9                                                | 34  | 0.51117    | 1.711974  | 0.00552486 | 0.0178457  | 0.99  |
| MULLIGHAN_MLL_SIGNATURE_2_DN                                      | 260 | 0.30030397 | 1.4178154 | 0.00558659 | 0.09965973 | 1     |
| TONKS_TARGETS_OF_RUNX1_RUNX1T1_FUSION_SUSTAINED_IN_ERYTHROCYTE_UP | 43  | 0.5103172  | 1.7432295 | 0.00564972 | 0.01402348 | 0.955 |
| MIKKELSEN_MCV6_LCP_WITH_H3K27ME3                                  | 24  | 0.5688732  | 1.7203941 | 0.00564972 | 0.01673836 | 0.981 |
| WANG METHYLATED_IN_BREAST_CANCER                                  | 35  | 0.5100748  | 1.7023821 | 0.00564972 | 0.01875515 | 0.994 |
| HALMOS_CEBPA_TARGETS_DN                                           | 43  | 0.50430936 | 1.7680418 | 0.00566572 | 0.01150561 | 0.921 |
| ONDER_CDH1_TARGETS_3_DN                                           | 53  | 0.46669105 | 1.7265489 | 0.00568182 | 0.0161632  | 0.975 |



|                                                    |     |            |           |            |            |       |
|----------------------------------------------------|-----|------------|-----------|------------|------------|-------|
| KANG_GIST_WITH_PDGFR_A_UP                          | 48  | 0.46149018 | 1.6521113 | 0.00574713 | 0.0263192  | 1     |
| ENGELMANN_CANCER_PROGENITORS_UP                    | 43  | 0.46709308 | 1.6434339 | 0.00574713 | 0.02767098 | 1     |
| TAKEDA_TARGETS_OF_NUP98_HOXA9_FUSION_6HR_DN        | 36  | 0.52432317 | 1.7828989 | 0.00578035 | 0.01021981 | 0.892 |
| BERENJENO_ROCK_SIGNALING_NOT_VIA_RHOA_DN           | 46  | 0.47528094 | 1.7008584 | 0.00598802 | 0.01892132 | 0.995 |
| LIM_MAMMARY_LUMINAL_PROGENITOR_UP                  | 54  | 0.4542483  | 1.6888542 | 0.00600601 | 0.0206124  | 0.997 |
| TORCHIA_TARGETS_OF_EWSR1_FLI1_FUSION_UP            | 241 | 0.28885886 | 1.3418065 | 0.0060241  | 0.14229342 | 1     |
| ZHENG_IL22_SIGNALING_UP                            | 49  | 0.4642206  | 1.669315  | 0.00606061 | 0.02336426 | 1     |
| OSWALD_HEMATOPOIETIC_STEM_CELL_IN_COLLAGEN_GEL_DN  | 239 | 0.27770677 | 1.3031499 | 0.00609756 | 0.16914372 | 1     |
| HERNANDEZ_MITOTIC_ARREST_BY_DOCETAXEL_2_UP         | 56  | 0.45650482 | 1.6776886 | 0.00621118 | 0.0222816  | 1     |
| LEE_LIVER_CANCER_E2F1_UP                           | 57  | 0.42891213 | 1.5780864 | 0.00632911 | 0.04066098 | 1     |
| BOYLAN_MULTIPLE_MYELOMA_PCA3_UP                    | 71  | 0.42837945 | 1.6500129 | 0.00636943 | 0.02657372 | 1     |
| MUNSHI_MULTIPLE_MYELOMA_UP                         | 76  | 0.3993554  | 1.6015846 | 0.00638978 | 0.03551449 | 1     |
| GROSS_HYPOXIA_VIA_HIF1A_DN                         | 99  | 0.3729222  | 1.5385792 | 0.00662252 | 0.05204425 | 1     |
| GAVIN_FOXP3_TARGETS_CLUSTER_P7                     | 78  | 0.40996164 | 1.6067716 | 0.00696864 | 0.03441806 | 1     |
| WANG_BARRETTS_ESOPHAGUS_DN                         | 25  | 0.5419389  | 1.702552  | 0.00721154 | 0.01885187 | 0.994 |
| WANG_ESOPHAGUS_CANCER_VS_NORMAL_UP                 | 105 | 0.38686058 | 1.5690305 | 0.00724638 | 0.04287696 | 1     |
| OUELLET_CULTURED_OVARIAN_CANCER_INVASIVE_VS_LMP_DN | 30  | 0.5147213  | 1.6742815 | 0.00733496 | 0.0227051  | 1     |
| LIAN_NEUTROPHIL_GRANULE_CONSTITUENTS               | 24  | 0.6190366  | 1.8991609 | 0.00737101 | 0.00377371 | 0.466 |
| PEREZ_TP63_TARGETS                                 | 303 | 0.2672885  | 1.2863721 | 0.00746269 | 0.1806171  | 1     |
| KASLER_HDAC7_TARGETS_2_DN                          | 30  | 0.5350505  | 1.7512293 | 0.00759494 | 0.01328159 | 0.944 |
| ZIRN_TRETINOIN_RESPONSE_UP                         | 18  | 0.6153175  | 1.7448869 | 0.00771208 | 0.01395776 | 0.954 |
| CAFFAREL_RESPONSE_TO_THC_UP                        | 31  | 0.50108683 | 1.6091572 | 0.00787402 | 0.03394017 | 1     |
| AIGNER_ZEB1_TARGETS                                | 32  | 0.5371249  | 1.7415437 | 0.00793651 | 0.01413244 | 0.956 |
| YOSHIMURA_MAPK8_TARGETS_DN                         | 334 | 0.2869028  | 1.4221977 | 0.00793651 | 0.09748088 | 1     |
| MEISSNER_NPC_HCP_WITH_H3K4ME3_AND_H3K27ME3         | 130 | 0.3375901  | 1.4462373 | 0.00858369 | 0.08540312 | 1     |
| CHIBA_RESPONSE_TO_TSA_UP                           | 48  | 0.4382253  | 1.5803576 | 0.00859599 | 0.04014097 | 1     |
| TIEN_INTESTINE_PROBIOTICS_6HR_UP                   | 47  | 0.41283974 | 1.4822489 | 0.00869565 | 0.07115378 | 1     |
| RODRIGUES_NTN1_TARGETS_DN                          | 133 | 0.36598742 | 1.561912  | 0.00873363 | 0.04496157 | 1     |
| HAN_JNK_SIGNALING_DN                               | 37  | 0.4876849  | 1.6557974 | 0.00877193 | 0.02578902 | 1     |
| MOLENAAR_TARGETS_OF_CCND1_AND_CDK4_UP              | 54  | 0.43846428 | 1.6204404 | 0.00903614 | 0.03189207 | 1     |
| KORKOLA_EMBRYONIC_CARCINOMA_VS_SEMINOMA_UP         | 21  | 0.58761626 | 1.727226  | 0.0090703  | 0.01606868 | 0.974 |
| ADDYA_ERYTHROID_DIFFERENTIATION_BY_HEMIN           | 67  | 0.43663532 | 1.6646916 | 0.00923077 | 0.02415497 | 1     |
| GOTZMANN_EPITHELIAL_TO_MESENCHYMAL_TRANSITION_DN   | 192 | 0.28592116 | 1.3078643 | 0.00925926 | 0.16567521 | 1     |
| SCHAEFFER_PROSTATE_DEVELOPMENT_48HR_UP             | 433 | 0.27308512 | 1.3587124 | 0.00943396 | 0.13266738 | 1     |
| ZHAN_MULTIPLE_MYELOMA_CD1_VS_CD2_UP                | 60  | 0.44406858 | 1.6700448 | 0.00952381 | 0.02330202 | 1     |
| MIKKELSEN_MCV6_ICP_WITH_H3K27ME3                   | 65  | 0.3973975  | 1.562322  | 0.00952381 | 0.04487525 | 1     |
| VILIMAS_NOTCH1_TARGETS_DN                          | 18  | 0.6143922  | 1.7611396 | 0.00961539 | 0.01214288 | 0.935 |
| BURTON_ADIPOGENESIS_8                              | 76  | 0.39831674 | 1.5778772 | 0.00967742 | 0.04065691 | 1     |
| SCHUETZ_BREAST_CANCER_DUCTAL_INVASIVE_DN           | 80  | 0.37420243 | 1.4880444 | 0.00977199 | 0.06888032 | 1     |
| GAVIN_PDE3B_TARGETS                                | 21  | 0.57746416 | 1.7367777 | 0.00990099 | 0.0148051  | 0.963 |
| SENESE_HDAC1_AND_HDAC2_TARGETS_DN                  | 199 | 0.30715534 | 1.4094434 | 0.01       | 0.10401254 | 1     |

**Table S4. Gene listing of PKC-driven inducible genes that are sensitive to the PKC-θ pathway.**

| Probeset | Symbol       | ENSEMBL          | Description                                                                                   | Induced by TGF | More in CSC than NCSC |
|----------|--------------|------------------|-----------------------------------------------------------------------------------------------|----------------|-----------------------|
| 16704182 | CSGALNACT2   | ENSG00000169826  | chondroitin sulfate N-acetylgalactosaminyltransferase 2                                       | yes            | yes                   |
| 16705011 | DKK1         | ENSG00000107984  | dickkopf 1 homolog                                                                            | yes            | yes                   |
| 16707327 | PCGF5        | ENSG00000180628  | polycomb group ring finger 5                                                                  | yes            | yes                   |
| 16716478 | ANKRD1       | ENSG00000148677  | ankyrin repeat domain 1                                                                       | yes            | yes                   |
| 16756202 | EID3         | ENSG00000255150  | EP300 interacting inhibitor of differentiation 3                                              | yes            | yes                   |
| 16765558 | ITGA5        | ENSG00000161638  | integrin, alpha 5 (fibronectin receptor, alpha polypeptide)                                   | yes            | yes                   |
| 16773759 | FRY          | ENSG00000073910  | furry homolog                                                                                 | yes            | yes                   |
| 16774727 | FNDC3A       | ENSG00000102531  | fibronectin type III domain containing 3A                                                     | yes            | yes                   |
| 16825371 | NUPR1        | ENSG00000176046  | nuclear protein, transcriptional regulator, 1                                                 | yes            | yes                   |
| 16867074 | MFSD12       | ENSG00000161091  | major facilitator superfamily domain containing 12                                            | yes            | yes                   |
| 16909021 | SERPINE2     | ENSG00000135919  | serpin peptidase inhibitor, clade E (nexin, plasminogen activator inhibitor type 1), member 2 | yes            | yes                   |
| 16933470 | TTC28        | ENSG00000100154  | tetratricopeptide repeat domain 28                                                            | yes            | yes                   |
| 16979917 | SLC7A11      | ENSG00000151012  | solute carrier family 7 (anionic amino acid transporter light chain, xc- system), member 11   | yes            | yes                   |
| 16985950 | MAP1B        | ENSG00000131711  | microtubule-associated protein 1B                                                             | yes            | yes                   |
| 16989736 | EGR1         | ENSG00000120738  | early growth response 1                                                                       | yes            | yes                   |
| 17000463 | EGR1         | ENSG00000120738  | early growth response 1                                                                       | yes            | yes                   |
| 17015862 | ATXN1        | ENSG00000124788  | ataxin 1                                                                                      | yes            | yes                   |
| 17050381 | IFRD1        | ENSG00000006652  | interferon-related developmental regulator 1                                                  | yes            | yes                   |
| 17060061 | ASNS         | ENSG00000070669  | asparagine synthetase                                                                         | yes            | yes                   |
| 17077594 | ASPH         | ENSG00000198363  | aspartate beta-hydroxylase                                                                    | yes            | yes                   |
| 17079210 | GEM          | ENSG00000164949  | GTP binding protein overexpressed in skeletal muscle                                          | yes            | yes                   |
| 16665182 | PRKAA2       | ENSG00000162409  | protein kinase, AMP-activated, alpha 2 catalytic subunit                                      | no             | yes                   |
| 16670479 | C1orf51      | ENSG00000159208  | chromosome 1 open reading frame 51                                                            | no             | yes                   |
| 16674845 | LAMC2        | ENSG00000058085  | laminin, gamma 2                                                                              | no             | yes                   |
| 16675924 | ELF3         | ENSG00000163435  | E74-like factor 3 (ets domain transcription factor, epithelial-specific )                     | no             | yes                   |
| 16681304 | ERF1         | ENSG00000116285  | ERBB receptor feedback inhibitor 1                                                            | no             | yes                   |
| 16681827 | DHRS3        | ENSG00000162496  | dehydrogenase/reductase                                                                       | no             | yes                   |
| 16684812 | RNF19B       | ENSG00000116514  | ring finger protein 19B                                                                       | no             | yes                   |
| 16691403 | CD58         | ENSG00000116815  | CD58 molecule                                                                                 | no             | yes                   |
| 16697981 | LOC100289488 | NA               | uncharacterized LOC100289488                                                                  | no             | yes                   |
| 16705961 | DDIT4        | ENSG00000168209  | DNA-damage-inducible transcript 4                                                             | no             | yes                   |
| 16706499 | PPIF         | ENSG00000108179  | peptidylprolyl isomerase F                                                                    | no             | yes                   |
| 16707120 | STAMBPL1     | ENSG00000138134  | STAM binding protein-like 1                                                                   | no             | yes                   |
| 16707180 | IFIT2        | ENSG00000119922  | interferon-induced protein with tetratricopeptide repeats 2                                   | no             | yes                   |
| 16707184 | IFIT3        | ENSG00000119917  | interferon-induced protein with tetratricopeptide repeats 3                                   | no             | yes                   |
| 16709128 | DUSP5        | ENSG00000138166  | dual specificity phosphatase 5                                                                | no             | yes                   |
| 16711343 | AKR1C2       | ENSG00000151632  | aldo-keto reductase family 1, member C2                                                       | no             | yes                   |
| 16713144 | ITGB1        | ENSG00000150093  | integrin, beta 1 (fibronectin receptor, beta polypeptide, antigen CD29 includes MDF2, MSK12)  | no             | yes                   |
| 16723614 | CD44         | ENSG00000026508  | CD44 molecule                                                                                 | no             | yes                   |
| 16723653 | CD44         | ENSG00000026508  | CD44 molecule                                                                                 | no             | yes                   |
| 16728227 | MYEOV        | ENSG00000172927  | myeloma overexpressed                                                                         | no             | yes                   |
| 16730522 | BIRC3        | ENSG00000023445  | baculoviral IAP repeat containing 3                                                           | no             | yes                   |
| 16743707 | MMP10        | ENSG00000166670  | matrix metalloproteinase 10                                                                   | no             | yes                   |
| 16743721 | MMP1         | ENSG00000196611  | matrix metalloproteinase 1                                                                    | no             | yes                   |
| 16743764 | MMP13        | ENSG00000137745  | matrix metalloproteinase 13                                                                   | no             | yes                   |
| 16744415 | IL18         | ENSG00000150782  | interleukin 18                                                                                | no             | yes                   |
| 16754397 | PHLDA1       | NA               | pleckstrin homology-like domain, family A, member 1                                           | no             | yes                   |
| 16756310 | TCP11L2      | ENSG00000166046  | t-complex 11                                                                                  | no             | yes                   |
| 16764053 | RND1         | ENSG00000172602  | Rho family GTPase 1                                                                           | no             | yes                   |
| 16766578 | DDIT3        | ENSG00000175197  | DNA-damage-inducible transcript 3                                                             | no             | yes                   |
| 16768297 | DUSP6        | ENSG00000139318  | dual specificity phosphatase 6                                                                | no             | yes                   |
| 16771417 | OASL         | ENSG00000135114  | 2'-5'-oligoadenylate synthetase-like                                                          | no             | yes                   |
| 16784226 | ERO1L        | ENSG00000197930  | ERO1-like                                                                                     | no             | yes                   |
| 16793024 | ERO1L        | ENSG00000197930  | ERO1-like                                                                                     | no             | yes                   |
| 16796694 | WARS         | ENSG00000140105  | tryptophanyl-tRNA synthetase                                                                  | no             | yes                   |
| 16802251 | SMAD3        | ENSG00000166949  | SMAD family member 3                                                                          | no             | yes                   |
| 16803018 | ARID3B       | ENSG00000179361  | AT rich interactive domain 3B                                                                 | no             | yes                   |
| 16803754 | KIAA1199     | ENSG00000103888  | KIAA1199                                                                                      | no             | yes                   |
| 16819478 | CCL22        | ENSG00000102962  | chemokine                                                                                     | no             | yes                   |
| 16821330 | PLCG2        | ENSG00000197943  | phospholipase C, gamma 2 (phosphatidylinositol-specific)                                      | no             | yes                   |
| 16830577 | CD68         | ENSG00000129226  | CD68 molecule                                                                                 | no             | yes                   |
| 16833060 | LRR37B       | ENSG00000185158  | leucine rich repeat containing 37B                                                            | no             | yes                   |
| 16843511 | CCL5         | ENSG00000161570  | chemokine                                                                                     | no             | yes                   |
| 16844294 | NR1D1        | ENSG00000126368  | nuclear receptor subfamily 1, group D, member 1                                               | no             | yes                   |
| 16846864 | MMD          | ENSG00000108960  | monocyte to macrophage differentiation-associated                                             | no             | yes                   |
| 16847771 | ERN1         | ENSG00000178607  | endoplasmic reticulum to nucleus signaling 1                                                  | no             | yes                   |
| 16852666 | SEC11C       | ENSG00000166562  | SEC11 homolog C                                                                               | no             | yes                   |
| 16852683 | PMAIP1       | ENSG00000141682  | phorbol-12-myristate-13-acetate-induced protein 1                                             | no             | yes                   |
| 16854268 | NPC1         | ENSG00000141458  | Niemann-Pick disease, type C1                                                                 | no             | yes                   |
| 16854301 | ANKRD29      | ENSG00000154065  | ankyrin repeat domain 29                                                                      | no             | yes                   |
| 16859090 | CASP14       | ENSG00000105141  | caspase 14, apoptosis-related cysteine peptidase                                              | no             | yes                   |
| 16859795 | GDF15        | ENSG00000130513  | growth differentiation factor 15                                                              | no             | yes                   |
| 16861961 | IL29         | ENSG00000182393  | ---                                                                                           | no             | yes                   |
| 16862548 | CEACAM5      | ENSG00000105388  | carcinoembryonic antigen-related cell adhesion molecule 5                                     | no             | yes                   |
| 16863877 | PPP1R15A     | ENSG00000087074  | protein phosphatase 1, regulatory subunit 15A                                                 | no             | yes                   |
| 16873060 | PLAUR        | ENSG000000011422 | plasminogen activator, urokinase receptor                                                     | no             | yes                   |
| 16876764 | RSAD2        | ENSG00000134321  | radical S-adenosyl methionine domain containing 2                                             | no             | yes                   |
| 16878994 | RASGRP3      | ENSG00000152689  | RAS guanyl releasing protein 3                                                                | no             | yes                   |
| 16879500 | PLEKHH2      | ENSG00000152527  | pleckstrin homology domain containing, family H (with MyTH4 domain) member 2                  | no             | yes                   |
| 16879721 | EPAS1        | ENSG00000116016  | endothelial PAS domain protein 1                                                              | no             | yes                   |
| 16881138 | MXD1         | ENSG00000059728  | MAX dimerization protein 1                                                                    | no             | yes                   |
| 16883690 | IL1RL1       | ENSG00000115602  | interleukin 1 receptor-like 1                                                                 | no             | yes                   |
| 16884523 | SLC20A1      | ENSG00000144136  | solute carrier family 20 (phosphate transporter), member 1                                    | no             | yes                   |

|          |            |                 |                                                                                               |     |     |
|----------|------------|-----------------|-----------------------------------------------------------------------------------------------|-----|-----|
| 16888803 | INPP1      | ENSG00000151689 | inositol polyphosphate-1-phosphatase                                                          | no  | yes |
| 16890099 | CCNYL1     | ENSG00000163249 | cyclin Y-like 1                                                                               | no  | yes |
| 16896764 | MAP4K3     | ENSG00000011566 | mitogen-activated protein kinase kinase kinase kinase 3                                       | no  | yes |
| 16903491 | RND3       | ENSG00000115963 | Rho family GTPase 3                                                                           | no  | yes |
| 16911261 | BMP2       | ENSG00000125845 | bone morphogenetic protein 2                                                                  | no  | yes |
| 16914812 | CEBPB      | ENSG00000172216 | CCAAT/enhancer binding protein (C/EBP), beta                                                  | no  | yes |
| 16917373 | FLRT3      | ENSG00000125848 | fibronectin leucine rich transmembrane protein 3                                              | no  | yes |
| 16920169 | B4GALT5    | ENSG00000158470 | UDP-Gal:betaGlcNAc beta 1,4- galactosyltransferase, polypeptide 5                             | no  | yes |
| 16922779 | ETS2       | ENSG00000157557 | v-ets erythroblastosis virus E26 oncogene homolog 2                                           | no  | yes |
| 16941024 | SEMA3B     | ENSG00000012171 | sema domain, immunoglobulin domain (Ig), short basic domain, secreted, (semaphorin) 3B        | no  | yes |
| 16947113 | RAP2B      | ENSG00000181467 | RAP2B, member of RAS oncogene family                                                          | no  | yes |
| 16948540 | B3GNT5     | ENSG00000176597 | UDP-GlcNAc:betaGal beta-1,3-N-acetylglucosaminyltransferase 5                                 | no  | yes |
| 16949499 | FLJ42393   | ENSG00000213132 | uncharacterized LOC401105                                                                     | no  | yes |
| 16951696 | NEK10      | ENSG00000163491 | NIMA                                                                                          | no  | yes |
| 16951756 | SLC4A7     | ENSG00000033867 | solute carrier family 4, sodium bicarbonate cotransporter, member 7                           | no  | yes |
| 16960304 | CP         | ENSG00000047457 | ceruloplasmin                                                                                 | no  | yes |
| 16960355 | TM4SF1     | ENSG00000169908 | transmembrane 4 L six family member 1                                                         | no  | yes |
| 16960911 | LXN        | ENSG00000079257 | latexin                                                                                       | no  | yes |
| 16961551 | PLD1       | ENSG00000075651 | phospholipase D1, phosphatidylcholine-specific                                                | no  | yes |
| 16962022 | LAMP3      | ENSG00000078081 | lysosomal-associated membrane protein 3                                                       | no  | yes |
| 16964735 | S100P      | ENSG00000163993 | S100 calcium binding protein P                                                                | no  | yes |
| 16967853 | AREG       | ENSG00000109321 | amphiregulin                                                                                  | no  | yes |
| 16967863 | AREG       | ENSG00000109321 | amphiregulin                                                                                  | no  | yes |
| 16968765 | HERC5      | ENSG00000138646 | HECT and RLD domain containing E3 ubiquitin protein ligase 5                                  | no  | yes |
| 16975234 | TMEM156    | ENSG00000121895 | transmembrane protein 156                                                                     | no  | yes |
| 16977052 | CXCL10     | ENSG00000169245 | chemokine                                                                                     | no  | yes |
| 16983848 | RAI14      | ENSG00000039560 | retinoic acid induced 14                                                                      | no  | yes |
| 16998293 | GLRX       | ENSG00000173221 | glutaredoxin                                                                                  | no  | yes |
| 16998309 | ELL2       | ENSG00000118985 | elongation factor, RNA polymerase II, 2                                                       | no  | yes |
| 17000724 | HBEGF      | ENSG00000113070 | heparin-binding EGF-like growth factor                                                        | no  | yes |
| 17001100 | NR3C1      | ENSG00000113580 | nuclear receptor subfamily 3, group C, member 1 (glucocorticoid receptor)                     | no  | yes |
| 17007543 | ITPR3      | ENSG00000096433 | inositol 1,4,5-trisphosphate receptor, type 3                                                 | no  | yes |
| 17009093 | VEGFA      | ENSG00000112715 | vascular endothelial growth factor A                                                          | no  | yes |
| 17012946 | TNFAIP3    | ENSG00000118503 | tumor necrosis factor, alpha-induced protein 3                                                | no  | yes |
| 17019484 | GTPBP2     | ENSG00000172432 | GTP binding protein 2                                                                         | no  | yes |
| 17024144 | IFNGR1     | ENSG00000027697 | interferon gamma receptor 1                                                                   | no  | yes |
| 17025267 | SOD2       | ENSG00000112096 | superoxide dismutase 2, mitochondrial                                                         | no  | yes |
| 17045917 | UPP1       | ENSG00000183696 | uridine phosphorylase 1                                                                       | no  | yes |
| 17046135 | EGFR       | ENSG00000146648 | epidermal growth factor receptor                                                              | no  | yes |
| 17050591 | MET        | ENSG00000105976 | met proto-oncogene                                                                            | no  | yes |
| 17059828 | TFPI2      | ENSG00000105825 | tissue factor pathway inhibitor 2                                                             | no  | yes |
| 17060143 | BAIAP2L1   | ENSG00000006453 | BAI1-associated protein 2-like 1                                                              | no  | yes |
| 17061545 | NAMPT      | ENSG00000105835 | nicotinamide phosphoribosyltransferase                                                        | no  | yes |
| 17069212 | SDCBP      | ENSG00000137575 | syndecan binding protein                                                                      | no  | yes |
| 17070013 | RDH10      | ENSG00000121039 | retinol dehydrogenase 10                                                                      | no  | yes |
| 17070492 | ATP6VOD2   | ENSG00000147614 | ATPase, H+ transporting, lysosomal 38kDa, V0 subunit d2                                       | no  | yes |
| 17072351 | FAM83A     | ENSG00000147689 | family with sequence similarity 83, member A                                                  | no  | yes |
| 17075168 | CSGALNACT1 | ENSG00000147408 | chondroitin sulfate N-acetylgalactosaminyltransferase 1                                       | no  | yes |
| 17075426 | TNFRSF10B  | ENSG00000120889 | tumor necrosis factor receptor superfamily, member 10b                                        | no  | yes |
| 17081829 | SLC45A4    | ENSG00000022567 | solute carrier family 45, member 4                                                            | no  | yes |
| 17083614 | LURAP1L    | ENSG00000153714 | leucine rich adaptor protein 1-like                                                           | no  | yes |
| 17052823 | ZYX        | ENSG00000159840 | zyxin                                                                                         | yes | no  |
| 16920121 | ZNFX1      | ENSG00000124201 | zinc finger, NFX1-type containing 1                                                           | yes | no  |
| 16697686 | ZNF281     | ENSG00000162702 | zinc finger protein 281                                                                       | yes | no  |
| 16703715 | ZEB1       | ENSG00000148516 | zinc finger E-box binding homeobox 1                                                          | yes | no  |
| 17013657 | ULBP1      | ENSG00000111981 | UL16 binding protein 1                                                                        | yes | no  |
| 16756163 | TXNRD1     | ENSG00000198431 | thioredoxin reductase 1                                                                       | yes | no  |
| 16764305 | TUBA1A     | ENSG00000167552 | tubulin, alpha 1a                                                                             | yes | no  |
| 16831908 | TRIM16L    | ENSG00000108448 | tripartite motif containing 16-like                                                           | yes | no  |
| 16841662 | TRIM16     | ENSG00000221926 | tripartite motif containing 16                                                                | yes | no  |
| 17057525 | TNS3       | ENSG00000136205 | tensin 3                                                                                      | yes | no  |
| 16849556 | TIMP2      | ENSG00000035862 | TIMP metalloproteinase inhibitor 2                                                            | yes | no  |
| 16677556 | TGFB2      | ENSG00000092969 | transforming growth factor, beta 2                                                            | yes | no  |
| 16872551 | TGFB1      | ENSG00000105329 | transforming growth factor, beta 1                                                            | yes | no  |
| 16930132 | SUN2       | NA              | Sad1 and UNC84 domain containing 2                                                            | yes | no  |
| 16884956 | STEAP3     | ENSG00000115107 | STEAP family member 3, metalloproteinase                                                      | yes | no  |
| 16993458 | SQSTM1     | ENSG00000161011 | sequestosome 1                                                                                | yes | no  |
| 16838059 | SPHK1      | ENSG00000176170 | sphingosine kinase 1                                                                          | yes | no  |
| 16909413 | SP110      | ENSG00000135899 | SP110 nuclear body protein                                                                    | yes | no  |
| 16842217 | SNORD3D    | NA              | small nucleolar RNA, C/D box 3D                                                               | yes | no  |
| 16721375 | SMPD1      | ENSG00000166311 | sphingomyelin phosphodiesterase 1, acid lysosomal                                             | yes | no  |
| 16959386 | SLCO2A1    | ENSG00000174640 | solute carrier organic anion transporter family, member 2A1                                   | yes | no  |
| 16937943 | SLC6A6     | ENSG00000131389 | solute carrier family 6 (neurotransmitter transporter, taurine), member 6                     | yes | no  |
| 16826970 | SLC38A7    | ENSG00000103042 | solute carrier family 38, member 7                                                            | yes | no  |
| 17002820 | SH3PXD2B   | ENSG00000174705 | SH3 and PX domains 2B                                                                         | yes | no  |
| 17049676 | SERPINE1   | ENSG00000106366 | serpin peptidase inhibitor, clade E (nexin, plasminogen activator inhibitor type 1), member 1 | yes | no  |
| 16811638 | SEMA7A     | ENSG00000138623 | semaphorin 7A, GPI membrane anchor (John Milton Hagen blood group)                            | yes | no  |
| 16885189 | RNU4ATAC   | ENSG00000208506 | RNA, U4atac small nuclear (U12-dependent splicing)                                            | yes | no  |
| 16795582 | PTPN21     | ENSG00000070778 | protein tyrosine phosphatase, non-receptor type 21                                            | yes | no  |
| 16837128 | PRKCA      | ENSG00000154229 | protein kinase C, alpha                                                                       | yes | no  |
| 16920671 | PMEPA1     | ENSG00000124225 | prostate transmembrane protein, androgen induced 1                                            | yes | no  |
| 16670432 | PLEKHO1    | ENSG00000023902 | pleckstrin homology domain containing, family O member 1                                      | yes | no  |
| 16702175 | PFKFB3     | ENSG00000170525 | 6-phosphofructo-2-kinase/fructose-2,6-biphosphatase 3                                         | yes | no  |
| 17003291 | PDLIM7     | ENSG00000196923 | PDZ and LIM domain 7                                                                          | yes | no  |
| 16707009 | PAPSS2     | ENSG00000198682 | 3'-phosphoadenosine 5'-phosphosulfate synthase 2                                              | yes | no  |

|          |           |                 |                                                                                         |     |    |
|----------|-----------|-----------------|-----------------------------------------------------------------------------------------|-----|----|
| 16668997 | OLFML3    | ENSG00000116774 | olfactomedin-like 3                                                                     | yes | no |
| 16768738 | NTN4      | ENSG00000074527 | netrin 4                                                                                | yes | no |
| 16713187 | NRP1      | ENSG00000099250 | neuropilin 1                                                                            | yes | no |
| 17029348 | NEU1      | ENSG00000204386 | sialidase 1                                                                             | yes | no |
| 17015652 | NEDD9     | ENSG00000111859 | neural precursor cell expressed, developmentally down-regulated 9                       | yes | no |
| 16722720 | NAV2      | ENSG00000166833 | neuron navigator 2                                                                      | yes | no |
| 16705329 | MYPN      | ENSG00000138347 | myopalladin                                                                             | yes | no |
| 16758264 | MLXIP     | ENSG00000175727 | MLX interacting protein                                                                 | yes | no |
| 16935290 | MKL1      | ENSG00000196588 | megakaryoblastic leukemia                                                               | yes | no |
| 16816018 | MIR365A   | ENSG00000199130 | microRNA 365a                                                                           | yes | no |
| 16839524 | MIR22HG   | ENSG00000186594 | MIR22 host gene                                                                         | yes | no |
| 16722081 | MICAL2    | ENSG00000133816 | microtubule associated monooxygenase, calponin and LIM domain containing 2              | yes | no |
| 16981426 | MFAP3L    | ENSG00000198948 | microfibrillar-associated protein 3-like                                                | yes | no |
| 16845876 | MAP3K14   | NA              | mitogen-activated protein kinase kinase kinase 14                                       | yes | no |
| 16703603 | LYZL1     | ENSG00000120563 | lysozyme-like 1                                                                         | yes | no |
| 16962911 | LRRCL15   | ENSG00000172061 | leucine rich repeat containing 15                                                       | yes | no |
| 17075478 | LOXL2     | ENSG00000134013 | lysyl oxidase-like 2                                                                    | yes | no |
| 17042997 | LFNG      | ENSG00000106003 | LFNG O-fucosylpeptide 3-beta-N-acetylglucosaminyltransferase                            | yes | no |
| 16811286 | LARP6     | ENSG00000166173 | La ribonucleoprotein domain family, member 6                                            | yes | no |
| 16674805 | LAMC1     | ENSG00000135862 | laminin, gamma 1 (formerly LAMB2)                                                       | yes | no |
| 17079910 | KLF10     | ENSG00000155090 | Kruppel-like factor 10                                                                  | yes | no |
| 16858710 | JUNB      | ENSG00000171223 | jun B proto-oncogene                                                                    | yes | no |
| 16891990 | ITM2C     | ENSG00000135916 | integral membrane protein 2C                                                            | yes | no |
| 16958356 | ITGB5     | ENSG00000082781 | integrin, beta 5                                                                        | yes | no |
| 16888512 | ITGAV     | ENSG00000138448 | integrin, alpha V                                                                       | yes | no |
| 16683377 | ID3       | ENSG00000117318 | inhibitor of DNA binding 3, dominant negative helix-loop-helix protein                  | yes | no |
| 16683264 | HTR1D     | ENSG00000179546 | 5-hydroxytryptamine (serotonin) receptor 1D, G protein-coupled                          | yes | no |
| 16929562 | HMOX1     | ENSG00000100292 | heme oxygenase                                                                          | yes | no |
| 16991018 | HMGXB3    | ENSG00000113716 | HMG box domain containing 3                                                             | yes | no |
| 16754373 | GLIPR1    | ENSG00000139278 | GLI pathogenesis-related 1                                                              | yes | no |
| 16856232 | FSTL3     | ENSG00000070404 | follistatin-like 3                                                                      | yes | no |
| 16808401 | FRMD5     | ENSG00000171877 | FERM domain containing 5                                                                | yes | no |
| 16947974 | FNDC3B    | ENSG00000075420 | fibronectin type III domain containing 3B                                               | yes | no |
| 16908037 | FN1       | ENSG00000115414 | fibronectin 1                                                                           | yes | no |
| 16786625 | FLVCR2    | ENSG00000119686 | feline leukemia virus subgroup C cellular receptor family, member 2                     | yes | no |
| 16685571 | FHL3      | ENSG00000183386 | four and a half LIM domains 3                                                           | yes | no |
| 16901393 | FHL2      | ENSG00000115641 | four and a half LIM domains 2                                                           | yes | no |
| 17080788 | FBXO32    | ENSG00000156804 | F-box protein 32                                                                        | yes | no |
| 16962380 | ETV5      | ENSG00000244405 | ets variant 5                                                                           | yes | no |
| 16877795 | EFR3B     | ENSG00000084710 | EFR3 homolog B                                                                          | yes | no |
| 16845445 | DUSP3     | ENSG00000108861 | dual specificity phosphatase 3                                                          | yes | no |
| 16672457 | DUSP23    | ENSG00000158716 | dual specificity phosphatase 23                                                         | yes | no |
| 17002846 | DUSP1     | ENSG00000120129 | dual specificity phosphatase 1                                                          | yes | no |
| 16775856 | DNAJC3    | ENSG00000102580 | Dnaj (Hsp40) homolog, subfamily C, member 3                                             | yes | no |
| 16666738 | CYR61     | ENSG00000142871 | cysteine-rich, angiogenic inducer, 61                                                   | yes | no |
| 16824046 | CPPED1    | ENSG00000103381 | calcineurin-like phosphoesterase domain containing 1                                    | yes | no |
| 16756212 | CHST11    | ENSG00000171310 | carbohydrate                                                                            | yes | no |
| 16970853 | CCRN4L    | ENSG00000151014 | CCR4 carbon catabolite repression 4-like                                                | yes | no |
| 17005138 | CAP2      | ENSG00000112186 | CAP, adenylate cyclase-associated protein, 2 (yeast)                                    | yes | no |
| 16816186 | C16orf45  | ENSG00000166780 | chromosome 16 open reading frame 45                                                     | yes | no |
| 16788014 | C14orf132 | ENSG00000227051 | chromosome 14 open reading frame 132                                                    | yes | no |
| 17066523 | BMP1      | ENSG00000168487 | bone morphogenetic protein 1                                                            | yes | no |
| 16937024 | BHLHE40   | ENSG00000134107 | basic helix-loop-helix family, member e40                                               | yes | no |
| 16983451 | BASP1     | ENSG00000176788 | brain abundant, membrane attached signal protein 1                                      | yes | no |
| 16803710 | ARNT2     | ENSG00000172379 | aryl-hydrocarbon receptor nuclear translocator 2                                        | yes | no |
| 16769514 | APPL2     | ENSG00000136044 | adaptor protein, phosphotyrosine interaction, PH domain and leucine zipper containing 2 | yes | no |
| 16934476 | APOL2     | ENSG00000128335 | apolipoprotein L, 2                                                                     | yes | no |
| 16763600 | AMIGO2    | ENSG00000139211 | adhesion molecule with Ig-like domain 2                                                 | yes | no |
| 16696824 | ABL2      | ENSG00000143322 | v-abl Abelson murine leukemia viral oncogene homolog 2                                  | yes | no |
| 16815735 | ABAT      | ENSG00000183044 | 4-aminobutyrate aminotransferase                                                        | yes | no |
| 16985094 | ZSWIM6    | ENSG00000130449 | zinc finger, SWIM-type containing 6                                                     | no  | no |
| 16858865 | ZSWIM4    | ENSG00000132003 | zinc finger, SWIM-type containing 4                                                     | no  | no |
| 16866115 | ZSCAN4    | ENSG00000180532 | zinc finger and SCAN domain containing 4                                                | no  | no |
| 16870956 | ZNF91     | ENSG00000167232 | zinc finger protein 91                                                                  | no  | no |
| 16875026 | ZNF616    | ENSG00000204611 | zinc finger protein 616                                                                 | no  | no |
| 16862895 | ZNF222    | ENSG00000159885 | zinc finger protein 222                                                                 | no  | no |
| 16870838 | ZNF208    | ENSG00000160321 | zinc finger protein 208                                                                 | no  | no |
| 17005888 | ZNF165    | ENSG00000197279 | zinc finger protein 165                                                                 | no  | no |
| 16794084 | ZFYVE26   | ENSG00000072121 | zinc finger, FYVE domain containing 26                                                  | no  | no |
| 16897026 | ZFP36L2   | ENSG00000152518 | ZFP36 ring finger protein-like 2                                                        | no  | no |
| 16794158 | ZFP36L1   | ENSG00000185650 | ZFP36 ring finger protein-like 1                                                        | no  | no |
| 16872223 | ZFP36     | NA              | ZFP36 ring finger protein                                                               | no  | no |
| 16861997 | ZFP36     | ENSG00000128016 | ZFP36 ring finger protein                                                               | no  | no |
| 16662623 | ZC3H12A   | ENSG00000163874 | zinc finger CCCH-type containing 12A                                                    | no  | no |
| 16830202 | XAF1      | ENSG00000132530 | XIAP associated factor 1                                                                | no  | no |
| 17060824 | VGF       | ENSG00000128564 | VGF nerve growth factor inducible                                                       | no  | no |
| 16845336 | VAT1      | ENSG00000108828 | vesicle amine transport protein 1 homolog                                               | no  | no |
| 16927283 | USP41     | NA              | ubiquitin specific peptidase 41                                                         | no  | no |
| 16932732 | USP41     | NA              | ubiquitin specific peptidase 41                                                         | no  | no |
| 16729485 | USP35     | ENSG00000118369 | ubiquitin specific peptidase 35                                                         | no  | no |
| 16926942 | USP18     | ENSG00000184979 | ubiquitin specific peptidase 18                                                         | no  | no |
| 16892601 | UGT1A9    | ENSG00000241119 | UDP glucuronosyltransferase 1 family, polypeptide A9                                    | no  | no |
| 16859205 | UCA1      | NA              | urothelial cancer associated 1                                                          | no  | no |
| 16812790 | UBE2Q2P1  | ENSG00000189136 | ubiquitin-conjugating enzyme E2Q family member 2 pseudogene 1                           | no  | no |
| 16738544 | UBE2L6    | ENSG00000156587 | ubiquitin-conjugating enzyme E2L 6                                                      | no  | no |

|          |              |                 |                                                                 |    |    |
|----------|--------------|-----------------|-----------------------------------------------------------------|----|----|
| 16954217 | UBA7         | ENSG00000182179 | ubiquitin-like modifier activating enzyme 7                     | no | no |
| 17015143 | TUBB2A       | ENSG00000137267 | tubulin, beta 2A class IIa                                      | no | no |
| 16785938 | TTC9         | ENSG00000133985 | tetratricopeptide repeat domain 9                               | no | no |
| 16811975 | TSPAN3       | ENSG00000140391 | tetraspanin 3                                                   | no | no |
| 16664218 | TSPAN1       | ENSG00000117472 | tetraspanin 1                                                   | no | no |
| 16721249 | TRIM6-TRIM34 | ENSG00000258588 | TRIM6-TRIM34 readthrough                                        | no | no |
| 16734929 | TRIM5        | ENSG00000132256 | tripartite motif containing 5                                   | no | no |
| 16724715 | TRIM48       | ENSG00000150244 | tripartite motif containing 48                                  | no | no |
| 16846915 | TRIM25       | ENSG00000121060 | tripartite motif containing 25                                  | no | no |
| 16734762 | TRIM21       | ENSG00000132109 | tripartite motif containing 21                                  | no | no |
| 17072601 | TRIB1        | ENSG00000173334 | tribbles homolog 1                                              | no | no |
| 16952118 | TRANK1       | ENSG00000168016 | tetratricopeptide repeat and ankyrin repeat containing 1        | no | no |
| 16949537 | TP63         | ENSG00000073282 | tumor protein p63                                               | no | no |
| 16844356 | TNS4         | ENSG00000131746 | tensin 4                                                        | no | no |
| 17001763 | TNIP1        | ENSG00000145901 | TNFAIP3 interacting protein 1                                   | no | no |
| 16961616 | TNFSF10      | ENSG00000121858 | tumor necrosis factor (ligand) superfamily, member 10           | no | no |
| 17019805 | TNFRSF21     | ENSG00000146072 | tumor necrosis factor receptor superfamily, member 21           | no | no |
| 16815310 | TNFRSF12A    | ENSG00000006327 | tumor necrosis factor receptor superfamily, member 12A          | no | no |
| 17075460 | TNFRSF10A    | ENSG00000104689 | tumor necrosis factor receptor superfamily, member 10a          | no | no |
| 17027794 | TNF          | NA              | tumor necrosis factor                                           | no | no |
| 17030620 | TNF          | NA              | tumor necrosis factor                                           | no | no |
| 17033337 | TNF          | NA              | tumor necrosis factor                                           | no | no |
| 17035418 | TNF          | NA              | tumor necrosis factor                                           | no | no |
| 17038117 | TNF          | NA              | tumor necrosis factor                                           | no | no |
| 17040712 | TNF          | NA              | tumor necrosis factor                                           | no | no |
| 17026267 | TNF          | ENSG00000232810 | tumor necrosis factor                                           | no | no |
| 17006659 | TNF          | ENSG00000232810 | tumor necrosis factor                                           | no | no |
| 16822438 | TMEM8A       | ENSG00000129925 | transmembrane protein 8A                                        | no | no |
| 16830778 | TMEM88       | ENSG00000167874 | transmembrane protein 88                                        | no | no |
| 16800156 | TMEM62       | ENSG00000137842 | transmembrane protein 62                                        | no | no |
| 16659537 | TMEM51       | ENSG00000171729 | transmembrane protein 51                                        | no | no |
| 16733421 | TMEM45B      | ENSG00000151715 | transmembrane protein 45B                                       | no | no |
| 16950877 | TMEM40       | ENSG00000088726 | transmembrane protein 40                                        | no | no |
| 16868920 | TMEM205      | ENSG00000105518 | transmembrane protein 205                                       | no | no |
| 16952782 | TMEM158      | ENSG00000249992 | transmembrane protein 158                                       | no | no |
| 16861047 | TMEM147      | ENSG00000105677 | transmembrane protein 147                                       | no | no |
| 17051943 | TMEM140      | ENSG00000146859 | transmembrane protein 140                                       | no | no |
| 16725405 | TMEM132A     | ENSG00000006118 | transmembrane protein 132A                                      | no | no |
| 16816386 | TMC7         | ENSG00000170537 | transmembrane channel-like 7                                    | no | no |
| 16849355 | TMC6         | ENSG00000141524 | transmembrane channel-like 6                                    | no | no |
| 16975226 | TLR6         | ENSG00000174130 | toll-like receptor 6                                            | no | no |
| 16972993 | TLR3         | ENSG00000164342 | toll-like receptor 3                                            | no | no |
| 16971631 | TLR2         | ENSG00000137462 | toll-like receptor 2                                            | no | no |
| 16929442 | TIMP3        | ENSG00000100234 | TIMP metalloproteinase inhibitor 3                              | no | no |
| 16867409 | TICAM1       | ENSG00000127666 | toll-like receptor adaptor molecule 1                           | no | no |
| 16802653 | THSD4        | ENSG00000187720 | thrombospondin, type I, domain containing 4                     | no | no |
| 16919158 | TGM2         | ENSG00000198959 | transglutaminase 2                                              | no | no |
| 17050522 | TES          | ENSG00000135269 | testis derived transcript                                       | no | no |
| 16789960 | TEP1         | ENSG00000129566 | telomerase-associated protein 1                                 | no | no |
| 16874273 | TEAD2        | ENSG00000074219 | TEA domain family member 2                                      | no | no |
| 16738803 | TCN1         | ENSG00000134827 | transcobalamin I (vitamin B12 binding protein, R binder family) | no | no |
| 16847520 | TBC1D3P2     | ENSG00000188755 | TBC1 domain family, member 3 pseudogene 2                       | no | no |
| 17030026 | TAPBP        | ENSG00000231925 | TAP binding protein                                             | no | no |
| 17032710 | TAPBP        | ENSG00000231925 | TAP binding protein                                             | no | no |
| 17037511 | TAPBP        | ENSG00000231925 | TAP binding protein                                             | no | no |
| 17018215 | TAPBP        | ENSG00000231925 | TAP binding protein                                             | no | no |
| 17040221 | TAPBP        | ENSG00000231925 | TAP binding protein                                             | no | no |
| 17034759 | TAP2         | ENSG00000204267 | transporter 2, ATP-binding cassette, sub-family B (MDR/TAP)     | no | no |
| 17039945 | TAP2         | ENSG00000204267 | transporter 2, ATP-binding cassette, sub-family B (MDR/TAP)     | no | no |
| 17017947 | TAP2         | ENSG00000204267 | transporter 2, ATP-binding cassette, sub-family B (MDR/TAP)     | no | no |
| 17037228 | TAP2         | ENSG00000204267 | transporter 2, ATP-binding cassette, sub-family B (MDR/TAP)     | no | no |
| 17029788 | TAP1         | NA              | transporter 1, ATP-binding cassette, sub-family B (MDR/TAP)     | no | no |
| 17032476 | TAP1         | NA              | transporter 1, ATP-binding cassette, sub-family B (MDR/TAP)     | no | no |
| 17034791 | TAP1         | NA              | transporter 1, ATP-binding cassette, sub-family B (MDR/TAP)     | no | no |
| 17037271 | TAP1         | NA              | transporter 1, ATP-binding cassette, sub-family B (MDR/TAP)     | no | no |
| 17039977 | TAP1         | NA              | transporter 1, ATP-binding cassette, sub-family B (MDR/TAP)     | no | no |
| 17042487 | TAP1         | NA              | transporter 1, ATP-binding cassette, sub-family B (MDR/TAP)     | no | no |
| 17017979 | TAP1         | ENSG00000168394 | transporter 1, ATP-binding cassette, sub-family B (MDR/TAP)     | no | no |
| 17027144 | TAP1         | ENSG00000168394 | transporter 1, ATP-binding cassette, sub-family B (MDR/TAP)     | no | no |
| 16818147 | STX4         | ENSG00000103496 | syntaxin 4                                                      | no | no |
| 17013279 | STX11        | ENSG00000135604 | syntaxin 11                                                     | no | no |
| 17075553 | STC1         | ENSG00000159167 | stanniocalcin 1                                                 | no | no |
| 16766093 | STAT2        | ENSG00000170581 | signal transducer and activator of transcription 2, 113kDa      | no | no |
| 16906534 | STAT1        | ENSG00000115415 | signal transducer and activator of transcription 1, 91kDa       | no | no |
| 16867278 | STAP2        | ENSG00000178078 | signal transducing adaptor family member 2                      | no | no |
| 16733473 | ST14         | ENSG00000149418 | suppression of tumorigenicity 14                                | no | no |
| 16916352 | SRXN1        | ENSG00000172070 | sulfiredoxin 1                                                  | no | no |
| 16800680 | SQRDL        | ENSG00000137767 | sulfide quinone reductase-like                                  | no | no |
| 16961056 | SPTSSB       | ENSG00000196542 | serine palmitoyltransferase, small subunit B                    | no | no |
| 17001063 | SPRY4        | ENSG00000187678 | sprouty homolog 4                                               | no | no |
| 16970435 | SPRY1        | ENSG00000164056 | sprouty homolog 1, antagonist of FGF signaling (Drosophila)     | no | no |
| 16693365 | SPRR2C       | NA              | small proline-rich protein 2C                                   | no | no |
| 16829801 | SPNS2        | ENSG00000183018 | spinster homolog 2                                              | no | no |
| 16817521 | SPNS1        | ENSG00000169682 | spinster homolog 1                                              | no | no |
| 16799690 | SPINT1       | ENSG00000166145 | serine peptidase inhibitor, Kunitz type 1                       | no | no |

|          |            |                 |                                                                                                         |    |    |
|----------|------------|-----------------|---------------------------------------------------------------------------------------------------------|----|----|
| 16889218 | SPATS2L    | ENSG00000196141 | spermatogenesis associated, serine-rich 2-like                                                          | no | no |
| 16891922 | SP100      | ENSG00000067066 | SP100 nuclear antigen                                                                                   | no | no |
| 17005276 | SOX4       | ENSG00000124766 | SRY                                                                                                     | no | no |
| 16850806 | SOGA2      | ENSG00000168502 | SOGA family member 2                                                                                    | no | no |
| 16823866 | SOCS1      | ENSG00000185338 | suppressor of cytokine signaling 1                                                                      | no | no |
| 16820556 | SNTB2      | ENSG00000168807 | syntrophin, beta 2 (dystrophin-associated protein A1, 59kDa, basic component 2)                         | no | no |
| 16823046 | SNORD60    | ENSG00000206630 | small nucleolar RNA, C/D box 60                                                                         | no | no |
| 16832566 | SNORD42A   | ENSG00000198242 | small nucleolar RNA, C/D box 42A                                                                        | no | no |
| 17026087 | SNORD32B   | ENSG00000201330 | small nucleolar RNA, C/D box 32B                                                                        | no | no |
| 17027281 | SNORD32B   | ENSG00000201330 | small nucleolar RNA, C/D box 32B                                                                        | no | no |
| 17030127 | SNORD32B   | ENSG00000201330 | small nucleolar RNA, C/D box 32B                                                                        | no | no |
| 17032817 | SNORD32B   | ENSG00000201330 | small nucleolar RNA, C/D box 32B                                                                        | no | no |
| 17035002 | SNORD32B   | ENSG00000201330 | small nucleolar RNA, C/D box 32B                                                                        | no | no |
| 17037609 | SNORD32B   | ENSG00000201330 | small nucleolar RNA, C/D box 32B                                                                        | no | no |
| 17006066 | SNORD32B   | ENSG00000201330 | small nucleolar RNA, C/D box 32B                                                                        | no | no |
| 16798230 | SNORD116-2 | ENSG00000251896 | small nucleolar RNA, C/D box 116-27                                                                     | no | no |
| 16798158 | SNORD116-1 | ENSG00000206609 | small nucleolar RNA, C/D box 116-11                                                                     | no | no |
| 16798331 | SNORD115-1 | ENSG00000201679 | small nucleolar RNA, C/D box 115-15                                                                     | no | no |
| 16788628 | SNORD114-6 | ENSG00000201263 | small nucleolar RNA, C/D box 114-6                                                                      | no | no |
| 17046586 | SNORA22    | ENSG00000206634 | small nucleolar RNA, H/ACA box 22                                                                       | no | no |
| 17060186 | SMURF1     | ENSG00000198742 | SMAD specific E3 ubiquitin protein ligase 1                                                             | no | no |
| 16919547 | SLPI       | ENSG00000124107 | secretory leukocyte peptidase inhibitor                                                                 | no | no |
| 17063536 | SLC37A3    | ENSG00000157800 | solute carrier family 37, member 3                                                                      | no | no |
| 17059974 | SLC25A13   | ENSG00000004864 | solute carrier family 25 (aspartate/glutamate carrier), member 13                                       | no | no |
| 16989001 | SLC22A4    | ENSG00000197208 | solute carrier family 22 (organic cation/ergothioneine transporter), member 4                           | no | no |
| 16984056 | SLC1A3     | ENSG00000079215 | solute carrier family 1 (glial high affinity glutamate transporter), member 3                           | no | no |
| 17083261 | SLC1A1     | ENSG00000106688 | solute carrier family 1 (neuronal/epithelial high affinity glutamate transporter, system Xag), member 1 | no | no |
| 17020823 | SLC17A5    | ENSG00000119899 | solute carrier family 17 (anion/sugar transporter), member 5                                            | no | no |
| 16993878 | SLC12A7    | ENSG00000113504 | solute carrier family 12 (potassium/chloride transporters), member 7                                    | no | no |
| 16744731 | SIK3       | ENSG00000160584 | SIK family kinase 3                                                                                     | no | no |
| 16926200 | SIK1       | ENSG00000142178 | salt-inducible kinase 1                                                                                 | no | no |
| 16953396 | SHISA5     | ENSG00000164054 | shisa homolog 5                                                                                         | no | no |
| 16808918 | SHC4       | ENSG00000185634 | SHC (Src homology 2 domain containing) family, member 4                                                 | no | no |
| 16980601 | SH3D19     | ENSG00000109686 | SH3 domain containing 19                                                                                | no | no |
| 16661141 | SH3BGR13   | ENSG00000142669 | SH3 domain binding glutamic acid-rich protein like 3                                                    | no | no |
| 16711562 | SFMBT2     | ENSG00000198879 | Scm-like with four mbt domains 2                                                                        | no | no |
| 16661544 | SESN2      | ENSG00000130766 | sestrin 2                                                                                               | no | no |
| 16852812 | SERPINB5   | ENSG00000206075 | serpin peptidase inhibitor, clade B (ovalbumin), member 5                                               | no | no |
| 17059119 | SEMA3C     | ENSG00000075223 | sema domain, immunoglobulin domain (Ig), short basic domain, secreted, (semaphorin) 3C                  | no | no |
| 16974968 | SEL1L3     | ENSG00000091490 | sel-1 suppressor of lin-12-like 3                                                                       | no | no |
| 16919567 | SDC4       | ENSG00000124145 | syndecan 4                                                                                              | no | no |
| 16817320 | SBK1       | ENSG00000188322 | SH3-binding domain kinase 1                                                                             | no | no |
| 16919022 | SAMHD1     | ENSG00000101347 | SAM domain and HD domain 1                                                                              | no | no |
| 17059776 | SAMD9L     | ENSG00000177409 | sterile alpha motif domain containing 9-like                                                            | no | no |
| 17059771 | SAMD9      | ENSG00000205413 | sterile alpha motif domain containing 9                                                                 | no | no |
| 16784333 | SAMD4A     | ENSG00000020577 | sterile alpha motif domain containing 4A                                                                | no | no |
| 16868619 | S1PR2      | ENSG00000267534 | sphingosine-1-phosphate receptor 2                                                                      | no | no |
| 16693414 | S100A8     | ENSG00000143546 | S100 calcium binding protein A8                                                                         | no | no |
| 16693427 | S100A7     | ENSG00000143556 | S100 calcium binding protein A7                                                                         | no | no |
| 16693409 | S100A12    | ENSG00000163221 | S100 calcium binding protein A12                                                                        | no | no |
| 16949442 | RTP4       | ENSG00000136514 | receptor                                                                                                | no | no |
| 16677361 | RPS6KC1    | ENSG00000136643 | ribosomal protein S6 kinase, 52kDa, polypeptide 1                                                       | no | no |
| 16913198 | ROMO1      | ENSG00000125995 | reactive oxygen species modulator 1                                                                     | no | no |
| 16838581 | RNF213     | ENSG00000173821 | ring finger protein 213                                                                                 | no | no |
| 17076170 | RNF122     | ENSG00000133874 | ring finger protein 122                                                                                 | no | no |
| 16663446 | RN5S46     | NA              | ---                                                                                                     | no | no |
| 16879764 | RHOQ       | ENSG00000119729 | ras homolog family member Q                                                                             | no | no |
| 17066791 | RHOBTB2    | ENSG00000008853 | Rho-related BTB domain containing 2                                                                     | no | no |
| 16764220 | RHEBL1     | ENSG00000167550 | Ras homolog enriched in brain like 1                                                                    | no | no |
| 16774303 | RGCC       | ENSG00000102760 | regulator of cell cycle                                                                                 | no | no |
| 16698286 | REN        | ENSG00000143839 | renin                                                                                                   | no | no |
| 16744174 | RDX        | ENSG00000137710 | radixin                                                                                                 | no | no |
| 16921527 | RBM11      | ENSG00000185272 | RNA binding motif protein 11                                                                            | no | no |
| 16807195 | RASGRP1    | ENSG00000172575 | RAS guanyl releasing protein 1                                                                          | no | no |
| 16841907 | RASD1      | ENSG00000108551 | RAS, dexamethasone-induced 1                                                                            | no | no |
| 16683022 | RAP1GAP    | ENSG00000076864 | RAP1 GTPase activating protein                                                                          | no | no |
| 17076285 | RAB11FIP1  | ENSG00000156675 | RAB11 family interacting protein 1                                                                      | no | no |
| 16674521 | QSOX1      | ENSG00000116260 | quiescin Q6 sulfhydryl oxidase 1                                                                        | no | no |
| 16879174 | QPCT       | ENSG00000115828 | glutaminy-peptide cyclotransferase                                                                      | no | no |
| 16695558 | PVRL4      | ENSG00000143217 | poliovirus receptor-related 4                                                                           | no | no |
| 16875656 | PTPRH      | ENSG00000080031 | protein tyrosine phosphatase, receptor type, H                                                          | no | no |
| 16710548 | PTPRE      | ENSG00000132334 | protein tyrosine phosphatase, receptor type, E                                                          | no | no |
| 16684144 | PTAFR      | ENSG00000169403 | platelet-activating factor receptor                                                                     | no | no |
| 16854904 | PSTPIP2    | ENSG00000152229 | proline-serine-threonine phosphatase interacting protein 2                                              | no | no |
| 17038034 | PSORS1C1   | ENSG00000204540 | psoriasis susceptibility 1 candidate 1                                                                  | no | no |
| 17030550 | PSORS1C1   | ENSG00000204540 | psoriasis susceptibility 1 candidate 1                                                                  | no | no |
| 17054460 | PSMG3      | ENSG00000157778 | proteasome (prosome, macropain) assembly chaperone 3                                                    | no | no |
| 17007307 | PSMB9      | ENSG00000240118 | proteasome (prosome, macropain) subunit, beta type, 9                                                   | no | no |
| 16872966 | PSG9       | ENSG00000183668 | pregnancy specific beta-1-glycoprotein 9                                                                | no | no |
| 16872944 | PSG4       | ENSG00000243137 | pregnancy specific beta-1-glycoprotein 4                                                                | no | no |
| 16872871 | PSG1       | ENSG00000231924 | pregnancy specific beta-1-glycoprotein 1                                                                | no | no |
| 16825970 | PRSS8      | ENSG00000052344 | protease, serine, 8                                                                                     | no | no |
| 16823215 | PRSS22     | ENSG00000005001 | protease, serine, 22                                                                                    | no | no |
| 16873581 | PRKD2      | ENSG00000105287 | protein kinase D2                                                                                       | no | no |
| 17054273 | PRKAR1B    | ENSG00000188191 | protein kinase, cAMP-dependent, regulatory, type I, beta                                                | no | no |

|          |          |                 |                                                                                        |    |    |
|----------|----------|-----------------|----------------------------------------------------------------------------------------|----|----|
| 16921289 | PRIC285  | ENSG00000130589 | peroxisomal proliferator-activated receptor A interacting complex 285                  | no | no |
| 16660212 | PQLC2    | ENSG00000040487 | PQ loop repeat containing 2                                                            | no | no |
| 16920699 | PPP4R1L  | ENSG00000124224 | protein phosphatase 4, regulatory subunit 1-like                                       | no | no |
| 16888349 | PPP1R1C  | ENSG00000150722 | protein phosphatase 1, regulatory (inhibitor) subunit 1C                               | no | no |
| 17031616 | PPP1R18  | NA              | protein phosphatase 1, regulatory subunit 18                                           | no | no |
| 17041697 | PPP1R18  | ENSG00000146112 | protein phosphatase 1, regulatory subunit 18                                           | no | no |
| 17026687 | PPP1R18  | ENSG00000146112 | protein phosphatase 1, regulatory subunit 18                                           | no | no |
| 17016946 | PPP1R18  | ENSG00000146112 | protein phosphatase 1, regulatory subunit 18                                           | no | no |
| 17034070 | PPP1R18  | ENSG00000146112 | protein phosphatase 1, regulatory subunit 18                                           | no | no |
| 17036337 | PPP1R18  | ENSG00000146112 | protein phosphatase 1, regulatory subunit 18                                           | no | no |
| 17039113 | PPP1R18  | ENSG00000146112 | protein phosphatase 1, regulatory subunit 18                                           | no | no |
| 16997344 | POLK     | NA              | polymerase                                                                             | no | no |
| 16897797 | PNPT1    | ENSG00000138035 | polyribonucleotide nucleotidyltransferase 1                                            | no | no |
| 16802918 | PML      | ENSG00000140464 | promyelocytic leukemia                                                                 | no | no |
| 16960165 | PLSCR2   | ENSG00000163746 | phospholipid scramblase 2                                                              | no | no |
| 16960186 | PLSCR1   | ENSG00000188313 | phospholipid scramblase 1                                                              | no | no |
| 16664005 | PLK3     | ENSG00000173846 | polo-like kinase 3                                                                     | no | no |
| 16907696 | PLEKHM3  | ENSG00000178385 | pleckstrin homology domain containing, family M, member 3                              | no | no |
| 16850344 | PLEKHM1  | ENSG00000225190 | pleckstrin homology domain containing, family M (with RUN domain) member 1             | no | no |
| 16793999 | PLEK2    | ENSG00000100558 | pleckstrin 2                                                                           | no | no |
| 16911283 | PLCB1    | ENSG00000182621 | phospholipase C, beta 1 (phosphoinositide-specific)                                    | no | no |
| 17076726 | PLAT     | ENSG00000104368 | plasminogen activator, tissue                                                          | no | no |
| 16873826 | PLA2G4C  | ENSG00000105499 | phospholipase A2, group IVC (cytosolic, calcium-independent)                           | no | no |
| 16914070 | PKIG     | ENSG00000168734 | protein kinase (cAMP-dependent, catalytic) inhibitor gamma                             | no | no |
| 16829170 | PIEZO1   | ENSG00000103335 | piezo-type mechanosensitive ion channel component 1                                    | no | no |
| 16708038 | PI4K2A   | ENSG00000155252 | phosphatidylinositol 4-kinase type 2 alpha                                             | no | no |
| 16943819 | PHLDB2   | ENSG00000144824 | pleckstrin homology-like domain, family B, member 2                                    | no | no |
| 16734491 | PHLDA2   | ENSG00000181649 | pleckstrin homology-like domain, family A, member 2                                    | no | no |
| 16774808 | PHF11    | ENSG00000136147 | PHD finger protein 11                                                                  | no | no |
| 16840846 | PER1     | ENSG00000179094 | period homolog 1                                                                       | no | no |
| 16990298 | PCDHB11  | ENSG00000197479 | protocadherin beta 11                                                                  | no | no |
| 16958124 | PARP9    | ENSG00000138496 | poly (ADP-ribose) polymerase family, member 9                                          | no | no |
| 16944695 | PARP14   | ENSG00000173193 | poly (ADP-ribose) polymerase family, member 14                                         | no | no |
| 17063480 | PARP12   | ENSG00000059378 | poly (ADP-ribose) polymerase family, member 12                                         | no | no |
| 16856159 | PARD6G   | ENSG00000178184 | par-6 partitioning defective 6 homolog gamma                                           | no | no |
| 16773328 | PABPC3   | ENSG00000151846 | poly(A) binding protein, cytoplasmic 3                                                 | no | no |
| 16703242 | OTUD1    | ENSG00000165312 | OTU domain containing 1                                                                | no | no |
| 16869710 | OR7C1    | ENSG00000127530 | olfactory receptor, family 7, subfamily C, member 1                                    | no | no |
| 16738389 | OR5M10   | ENSG00000254834 | olfactory receptor, family 5, subfamily M, member 10                                   | no | no |
| 16943169 | OR5K3    | ENSG00000206536 | olfactory receptor, family 5, subfamily K, member 3                                    | no | no |
| 16679777 | OR2L2    | ENSG00000203663 | olfactory receptor, family 2, subfamily L, member 2                                    | no | no |
| 16702547 | OPTN     | ENSG00000123240 | optineurin                                                                             | no | no |
| 16757347 | OAS3     | ENSG00000111331 | 2'-5'-oligoadenylate synthetase 3, 100kDa                                              | no | no |
| 16757373 | OAS2     | ENSG00000111335 | 2'-5'-oligoadenylate synthetase 2, 69/71kDa                                            | no | no |
| 16757324 | OAS1     | ENSG00000089127 | 2'-5'-oligoadenylate synthetase 1, 40/46kDa                                            | no | no |
| 16698466 | NUAK2    | ENSG00000163545 | NUAK family, SNF1-like kinase, 2                                                       | no | no |
| 17010760 | NT5E     | ENSG00000135318 | 5'-nucleotidase, ecto (CD73)                                                           | no | no |
| 16903897 | NR4A2    | ENSG00000153234 | nuclear receptor subfamily 4, group A, member 2                                        | no | no |
| 16751438 | NR4A1    | ENSG00000123358 | nuclear receptor subfamily 4, group A, member 1                                        | no | no |
| 16903537 | NMI      | ENSG00000123609 | N-myc                                                                                  | no | no |
| 16861895 | NFKBIB   | ENSG00000104825 | nuclear factor of kappa light polypeptide gene enhancer in B-cells inhibitor, beta     | no | no |
| 16791991 | NFKBIA   | ENSG00000100906 | nuclear factor of kappa light polypeptide gene enhancer in B-cells inhibitor, alpha    | no | no |
| 16708623 | NFKB2    | ENSG00000077150 | nuclear factor of kappa light polypeptide gene enhancer in B-cells 2                   | no | no |
| 16665346 | NFIA     | ENSG00000162599 | nuclear factor I/A                                                                     | no | no |
| 17044414 | NFE2L3   | ENSG00000050344 | nuclear factor                                                                         | no | no |
| 16659881 | NECAP2   | ENSG00000157191 | NECAP endocytosis associated 2                                                         | no | no |
| 16819689 | NDRG4    | ENSG00000103034 | NDRG family member 4                                                                   | no | no |
| 16697095 | NCF2     | ENSG00000116701 | neutrophil cytosolic factor 2                                                          | no | no |
| 16690403 | NBPF4    | ENSG00000196427 | neuroblastoma breakpoint family, member 4                                              | no | no |
| 16888963 | NABP1    | ENSG00000173559 | nucleic acid binding protein 1                                                         | no | no |
| 16993235 | N4BP3    | ENSG00000145911 | NEDD4 binding protein 3                                                                | no | no |
| 16777944 | N4BP2L1  | ENSG00000139597 | NEDD4 binding protein 2-like 1                                                         | no | no |
| 16826367 | N4BP1    | ENSG00000102921 | NEDD4 binding protein 1                                                                | no | no |
| 16809971 | MYO1E    | ENSG00000157483 | myosin IE                                                                              | no | no |
| 16888912 | MYO1B    | ENSG00000128641 | myosin IB                                                                              | no | no |
| 16934491 | MYH9     | ENSG00000100345 | myosin, heavy chain 9, non-muscle                                                      | no | no |
| 16864427 | MYH14    | ENSG00000105357 | myosin, heavy chain 14, non-muscle                                                     | no | no |
| 16939127 | MYD88    | ENSG00000172936 | myeloid differentiation primary response gene                                          | no | no |
| 17072669 | MYC      | ENSG00000136997 | v-myc myelocytomatosis viral oncogene homolog                                          | no | no |
| 16922959 | MX2      | ENSG00000183486 | myxovirus                                                                              | no | no |
| 16817692 | MVP      | ENSG00000013364 | major vault protein                                                                    | no | no |
| 16773346 | MTMR6    | ENSG00000139505 | myotubularin related protein 6                                                         | no | no |
| 16836375 | MSI2     | ENSG00000153944 | musashi homolog 2                                                                      | no | no |
| 16745002 | MPZL2    | ENSG00000149573 | myelin protein zero-like 2                                                             | no | no |
| 16717224 | MORN4    | ENSG00000171160 | MORN repeat containing 4                                                               | no | no |
| 16914395 | MMP9     | ENSG00000100985 | matrix metalloproteinase 9 (gelatinase B, 92kDa gelatinase, 92kDa type IV collagenase) | no | no |
| 16954759 | MIRLET7G | ENSG00000199150 | microRNA let-7g                                                                        | no | no |
| 16851349 | MIR320C1 | ENSG00000221493 | microRNA 320c-1                                                                        | no | no |
| 17081516 | MIR30B   | ENSG00000207582 | microRNA 30b                                                                           | no | no |
| 16698782 | MIR29C   | ENSG00000207966 | microRNA 29c                                                                           | no | no |
| 17062941 | MIR29A   | ENSG00000198981 | microRNA 29a                                                                           | no | no |
| 16869492 | MIR27A   | ENSG00000207808 | microRNA 27a                                                                           | no | no |
| 16766787 | MIR26A2  | ENSG00000207789 | microRNA 26a-2                                                                         | no | no |
| 16869489 | MIR24-2  | ENSG00000209707 | microRNA 24-2                                                                          | no | no |
| 16836624 | MIR21    | ENSG00000199004 | microRNA 21                                                                            | no | no |

|          |               |                 |                                                                                        |    |    |
|----------|---------------|-----------------|----------------------------------------------------------------------------------------|----|----|
| 16747663 | MIR141        | ENSG00000207708 | microRNA 141                                                                           | no | no |
| 16864741 | MIR125A       | ENSG00000208008 | microRNA 125a                                                                          | no | no |
| 16900875 | MGAT4A        | ENSG00000071073 | mannosyl (alpha-1,3-)-glycoprotein beta-1,4-N-acetylglucosaminyltransferase, isozyme A | no | no |
| 17073908 | MFSD3         | ENSG00000167700 | major facilitator superfamily domain containing 3                                      | no | no |
| 16813038 | MFGE8         | ENSG00000140545 | milk fat globule-EGF factor 8 protein                                                  | no | no |
| 16694593 | MEF2D         | ENSG00000116604 | myocyte enhancer factor 2D                                                             | no | no |
| 17037884 | MDC1          | ENSG00000137337 | mediator of DNA-damage checkpoint 1                                                    | no | no |
| 16692775 | MCL1          | ENSG00000143384 | myeloid cell leukemia sequence 1                                                       | no | no |
| 16894283 | MBOAT2        | ENSG00000143797 | membrane bound O-acyltransferase domain containing 2                                   | no | no |
| 16936397 | MAPK12        | ENSG00000188130 | mitogen-activated protein kinase 12                                                    | no | no |
| 16703659 | MAP3K8        | ENSG00000107968 | mitogen-activated protein kinase kinase kinase 8                                       | no | no |
| 17055657 | MACC1         | ENSG00000183742 | metastasis associated in colon cancer 1                                                | no | no |
| 16700806 | LYST          | ENSG00000143669 | lysosomal trafficking regulator                                                        | no | no |
| 16886417 | LYPD6B        | ENSG00000150556 | LY6/PLAUR domain containing 6B                                                         | no | no |
| 17069063 | LYN           | ENSG00000254087 | v-yes-1 Yamaguchi sarcoma viral related oncogene homolog                               | no | no |
| 16822356 | LUC7L         | ENSG00000007392 | LUC7-like                                                                              | no | no |
| 16860946 | LSR           | ENSG00000105699 | lipolysis stimulated lipoprotein receptor                                              | no | no |
| 17024653 | LRP11         | ENSG00000120256 | low density lipoprotein receptor-related protein 11                                    | no | no |
| 16782207 | LRP10         | ENSG00000197324 | low density lipoprotein receptor-related protein 10                                    | no | no |
| 16949467 | LPP           | ENSG00000145012 | LIM domain containing preferred translocation partner in lipoma                        | no | no |
| 16779006 | LPAR6         | ENSG00000139679 | lysophosphatidic acid receptor 6                                                       | no | no |
| 16818501 | LOC653562     | ENSG00000214617 | ---                                                                                    | no | no |
| 16734927 | LOC1006533:NA | ---             | ---                                                                                    | no | no |
| 16852296 | LIPG          | ENSG00000101670 | lipase, endothelial                                                                    | no | no |
| 16932486 | LINC00281     | NA              | long intergenic non-protein coding RNA 281                                             | no | no |
| 16966304 | LIMCH1        | ENSG00000064042 | LIM and calponin homology domains 1                                                    | no | no |
| 16933760 | LIF           | ENSG00000128342 | leukemia inhibitory factor                                                             | no | no |
| 16997503 | LHFPL2        | ENSG00000145685 | lipoma HMGIC fusion partner-like 2                                                     | no | no |
| 16796060 | LGMN          | ENSG00000100600 | legumain                                                                               | no | no |
| 16842403 | LGALS9B       | ENSG00000170298 | lectin, galactoside-binding, soluble, 9B                                               | no | no |
| 16849576 | LGALS3BP      | ENSG00000108679 | lectin, galactoside-binding, soluble, 3 binding protein                                | no | no |
| 16965313 | LAP3          | ENSG00000002549 | leucine aminopeptidase 3                                                               | no | no |
| 16698883 | LAMB3         | ENSG00000196878 | laminin, beta 3                                                                        | no | no |
| 16851486 | LAMA3         | ENSG00000053747 | laminin, alpha 3                                                                       | no | no |
| 16697893 | LAD1          | ENSG00000159166 | ladinin 1                                                                              | no | no |
| 16886174 | KYNU          | ENSG00000115919 | kynureninase                                                                           | no | no |
| 16924920 | KRTAP19-8     | ENSG00000206102 | keratin associated protein 19-8                                                        | no | no |
| 16751518 | KRT86         | ENSG00000170442 | keratin 86                                                                             | no | no |
| 16764833 | KRT83         | ENSG00000170523 | keratin 83                                                                             | no | no |
| 16764817 | KRT81         | ENSG00000205426 | keratin 81                                                                             | no | no |
| 16764791 | KRT80         | ENSG00000167767 | keratin 80                                                                             | no | no |
| 16764811 | KRT7          | ENSG00000135480 | keratin 7                                                                              | no | no |
| 16844509 | KRT23         | ENSG00000108244 | keratin 23                                                                             | no | no |
| 16841817 | KRT17P1       | NA              | keratin 17 pseudogene 1                                                                | no | no |
| 17060211 | KPNA7         | ENSG00000185467 | karyopherin alpha 7                                                                    | no | no |
| 16761350 | KLRC3         | ENSG00000205810 | killer cell lectin-like receptor subfamily C, member 3                                 | no | no |
| 16966049 | KLHL5         | ENSG00000109790 | kelch-like 5                                                                           | no | no |
| 17080809 | KLHL38        | ENSG00000175946 | kelch-like 38                                                                          | no | no |
| 16931766 | KLHDC7B       | ENSG00000130487 | kelch domain containing 7B                                                             | no | no |
| 16711280 | KLF6          | ENSG00000067082 | Kruppel-like factor 6                                                                  | no | no |
| 16789258 | KLC1          | ENSG00000126214 | kinesin light chain 1                                                                  | no | no |
| 16895452 | KIF3C         | ENSG00000084731 | kinesin family member 3C                                                               | no | no |
| 16828810 | KIAA1609      | ENSG00000140950 | KIAA1609                                                                               | no | no |
| 16706135 | KIAA0913      | ENSG00000214655 | KIAA0913                                                                               | no | no |
| 16830754 | KDM6B         | ENSG00000132510 | lysine                                                                                 | no | no |
| 16942511 | KBTBD8        | ENSG00000163376 | kelch repeat and BTB                                                                   | no | no |
| 16687875 | JUN           | ENSG00000177606 | jun proto-oncogene                                                                     | no | no |
| 16862324 | ITPKC         | ENSG00000086544 | inositol-trisphosphate 3-kinase C                                                      | no | no |
| 16904193 | ITGB6         | ENSG00000115221 | integrin, beta 6                                                                       | no | no |
| 16818239 | ITGAM         | ENSG00000169896 | integrin, alpha M (complement component 3 receptor 3 subunit)                          | no | no |
| 16835672 | ITGA3         | ENSG00000005884 | integrin, alpha 3 (antigen CD49C, alpha 3 subunit of VLA-3 receptor)                   | no | no |
| 16984689 | ITGA2         | ENSG00000164171 | integrin, alpha 2 (CD49B, alpha 2 subunit of VLA-2 receptor)                           | no | no |
| 16911517 | ISM1          | ENSG00000101230 | isthmin 1 homolog                                                                      | no | no |
| 16804490 | ISG20         | ENSG00000172183 | interferon stimulated exonuclease gene 20kDa                                           | no | no |
| 16657594 | ISG15         | ENSG00000187608 | ISG15 ubiquitin-like modifier                                                          | no | no |
| 16733995 | IRF7          | ENSG00000185507 | interferon regulatory factor 7                                                         | no | no |
| 16698923 | IRF6          | ENSG00000117595 | interferon regulatory factor 6                                                         | no | no |
| 16700673 | IRF2BP2       | ENSG00000168264 | interferon regulatory factor 2 binding protein 2                                       | no | no |
| 16999776 | IRF1          | ENSG00000125347 | interferon regulatory factor 1                                                         | no | no |
| 16937579 | IRAK2         | ENSG00000134070 | interleukin-1 receptor-associated kinase 2                                             | no | no |
| 16671457 | IL6R          | ENSG00000160712 | interleukin 6 receptor                                                                 | no | no |
| 16817254 | IL4R          | ENSG00000077238 | interleukin 4 receptor                                                                 | no | no |
| 16815355 | IL32          | ENSG00000008517 | interleukin 32                                                                         | no | no |
| 16861953 | IL28A         | ENSG00000183709 | ---                                                                                    | no | no |
| 16676682 | IL24          | ENSG00000162892 | interleukin 24                                                                         | no | no |
| 16676673 | IL20          | ENSG00000162891 | interleukin 20                                                                         | no | no |
| 16884629 | IL1RN         | ENSG00000136689 | interleukin 1 receptor antagonist                                                      | no | no |
| 16711484 | IL15RA        | ENSG00000134470 | interleukin 15 receptor, alpha                                                         | no | no |
| 16927742 | IGLV7-46      | NA              | immunoglobulin lambda variable 7-46                                                    | no | no |
| 16962333 | IGF2BP2       | ENSG00000073792 | insulin-like growth factor 2 mRNA binding protein 2                                    | no | no |
| 16922275 | IFNGR2        | ENSG00000159128 | interferon gamma receptor 2                                                            | no | no |
| 16733851 | IFITM3        | ENSG00000142089 | interferon induced transmembrane protein 3                                             | no | no |
| 16720085 | IFITM1        | ENSG00000185885 | interferon induced transmembrane protein 1                                             | no | no |
| 16707202 | IFIT5         | ENSG00000152778 | interferon-induced protein with tetratricopeptide repeats 5                            | no | no |
| 16707196 | IFIT1         | ENSG00000185745 | interferon-induced protein with tetratricopeptide repeats 1                            | no | no |



|          |          |                 |                                                                |    |    |
|----------|----------|-----------------|----------------------------------------------------------------|----|----|
| 16904365 | IFIH1    | ENSG00000115267 | interferon induced with helicase C domain 1                    | no | no |
| 16666485 | IFI44L   | ENSG00000137959 | interferon-induced protein 44-like                             | no | no |
| 16666509 | IFI44    | ENSG00000137965 | interferon-induced protein 44                                  | no | no |
| 16834545 | IFI35    | ENSG00000068079 | interferon-induced protein 35                                  | no | no |
| 16859763 | IFI30    | ENSG00000216490 | interferon, gamma-inducible protein 30                         | no | no |
| 16787814 | IFI27    | ENSG00000165949 | interferon, alpha-inducible protein 27                         | no | no |
| 16672390 | IFI16    | ENSG00000163565 | interferon, gamma-inducible protein 16                         | no | no |
| 16674618 | IER5     | ENSG00000162783 | immediate early response 5                                     | no | no |
| 17017018 | IER3     | ENSG00000137331 | immediate early response 3                                     | no | no |
| 17028909 | IER3     | ENSG00000137331 | immediate early response 3                                     | no | no |
| 17031687 | IER3     | ENSG00000137331 | immediate early response 3                                     | no | no |
| 17034143 | IER3     | ENSG00000137331 | immediate early response 3                                     | no | no |
| 17041752 | IER3     | ENSG00000137331 | immediate early response 3                                     | no | no |
| 17039184 | IER3     | ENSG00000137331 | immediate early response 3                                     | no | no |
| 16858830 | IER2     | ENSG00000160888 | immediate early response 2                                     | no | no |
| 16858137 | ICAM1    | ENSG00000090339 | intercellular adhesion molecule 1                              | no | no |
| 16683105 | HSPG2    | ENSG00000142798 | heparan sulfate proteoglycan 2                                 | no | no |
| 16859281 | HSH2D    | ENSG00000196684 | hematopoietic SH2 domain containing                            | no | no |
| 16946787 | HPS3     | ENSG00000163755 | Hermansky-Pudlak syndrome 3                                    | no | no |
| 16877048 | HPCAL1   | ENSG00000115756 | hippocalcin-like 1                                             | no | no |
| 16848739 | HN1      | ENSG00000189159 | hematological and neurological expressed 1                     | no | no |
| 16800642 | HMGN2P46 | ENSG00000179362 | high mobility group nucleosomal binding domain 2 pseudogene 46 | no | no |
| 17032957 | HLA-L    | ENSG00000243753 | major histocompatibility complex, class I, L (pseudogene)      | no | no |
| 17006222 | HLA-L    | ENSG00000243753 | major histocompatibility complex, class I, L (pseudogene)      | no | no |
| 17037658 | HLA-G    | NA              | major histocompatibility complex, class I, G                   | no | no |
| 17027330 | HLA-G    | ENSG00000204632 | major histocompatibility complex, class I, G                   | no | no |
| 17040375 | HLA-G    | ENSG00000204632 | major histocompatibility complex, class I, G                   | no | no |
| 17027301 | HLA-F    | NA              | major histocompatibility complex, class I, F                   | no | no |
| 17030147 | HLA-F    | NA              | major histocompatibility complex, class I, F                   | no | no |
| 17032837 | HLA-F    | NA              | major histocompatibility complex, class I, F                   | no | no |
| 17006087 | HLA-F    | ENSG00000204642 | major histocompatibility complex, class I, F                   | no | no |
| 17027443 | HLA-E    | ENSG00000204592 | major histocompatibility complex, class I, E                   | no | no |
| 17030288 | HLA-E    | ENSG00000204592 | major histocompatibility complex, class I, E                   | no | no |
| 17037774 | HLA-E    | ENSG00000204592 | major histocompatibility complex, class I, E                   | no | no |
| 17040488 | HLA-E    | ENSG00000204592 | major histocompatibility complex, class I, E                   | no | no |
| 17006261 | HLA-E    | ENSG00000204592 | major histocompatibility complex, class I, E                   | no | no |
| 17032993 | HLA-E    | ENSG00000204592 | major histocompatibility complex, class I, E                   | no | no |
| 17035115 | HLA-E    | ENSG00000204592 | major histocompatibility complex, class I, E                   | no | no |
| 17017126 | HLA-C    | ENSG00000204525 | major histocompatibility complex, class I, C                   | no | no |
| 17036504 | HLA-B    | NA              | major histocompatibility complex, class I, B                   | no | no |
| 17017147 | HLA-B    | ENSG00000234745 | major histocompatibility complex, class I, B                   | no | no |
| 17030188 | HLA-A    | ENSG00000206503 | major histocompatibility complex, class I, A                   | no | no |
| 17035049 | HLA-A    | ENSG00000206503 | major histocompatibility complex, class I, A                   | no | no |
| 17026109 | HLA-A    | ENSG00000206503 | major histocompatibility complex, class I, A                   | no | no |
| 17027344 | HLA-A    | ENSG00000206503 | major histocompatibility complex, class I, A                   | no | no |
| 17037670 | HLA-A    | ENSG00000206503 | major histocompatibility complex, class I, A                   | no | no |
| 17040387 | HLA-A    | ENSG00000206503 | major histocompatibility complex, class I, A                   | no | no |
| 17032882 | HLA-A    | ENSG00000206503 | major histocompatibility complex, class I, A                   | no | no |
| 17073739 | HEATR7A  | ENSG00000179832 | HEAT repeat containing 7A                                      | no | no |
| 16845537 | HDAC5    | ENSG00000108840 | histone deacetylase 5                                          | no | no |
| 16660757 | GRHL3    | ENSG00000158055 | grainyhead-like 3                                              | no | no |
| 16811359 | GRAMD2   | ENSG00000175318 | GRAM domain containing 2                                       | no | no |
| 16860834 | GRAMD1A  | ENSG00000089351 | GRAM domain containing 1A                                      | no | no |
| 16960567 | GPR87    | ENSG00000138271 | G protein-coupled receptor 87                                  | no | no |
| 17009446 | GPR115   | ENSG00000153294 | G protein-coupled receptor 115                                 | no | no |
| 16698304 | GOLT1A   | ENSG00000174567 | golgi transport 1A                                             | no | no |
| 16708089 | GOLGA7B  | ENSG00000155265 | golgin A7 family, member B                                     | no | no |
| 16804165 | GOLGA6L4 | ENSG00000197978 | golgin A6 family-like 4                                        | no | no |
| 16688929 | GNG5     | ENSG00000174021 | guanine nucleotide binding protein (G protein), gamma 5        | no | no |
| 16932117 | GGT3P    | ENSG00000197421 | gamma-glutamyltransferase 3 pseudogene                         | no | no |
| 16742244 | GDPD5    | ENSG00000158555 | glycerophosphodiester phosphodiesterase domain containing 5    | no | no |
| 16689384 | GBP4     | ENSG00000162654 | guanylate binding protein 4                                    | no | no |
| 16689352 | GBP2     | ENSG00000162645 | guanylate binding protein 2, interferon-inducible              | no | no |
| 16689332 | GBP1     | ENSG00000117228 | guanylate binding protein 1, interferon-inducible              | no | no |
| 16728141 | GAL      | ENSG00000069482 | galanin prepropeptide                                          | no | no |
| 16907691 | FZD5     | ENSG00000163251 | frizzled family receptor 5                                     | no | no |
| 16793942 | FUT8     | NA              | fucosyltransferase 8 (alpha (1,6) fucosyltransferase)          | no | no |
| 16804942 | FURIN    | ENSG00000140564 | furin                                                          | no | no |
| 16864756 | FPR3     | ENSG00000187474 | formyl peptide receptor 3                                      | no | no |
| 16778392 | FOXO1    | ENSG00000150907 | forkhead box O1                                                | no | no |
| 16992197 | FOXI1    | ENSG00000168269 | forkhead box I1                                                | no | no |
| 16740630 | FOSL1    | ENSG00000175592 | FOS-like antigen 1                                             | no | no |
| 16863287 | FOSB     | ENSG00000125740 | FBJ murine osteosarcoma viral oncogene homolog B               | no | no |
| 16786587 | FOS      | ENSG00000170345 | FBJ murine osteosarcoma viral oncogene homolog                 | no | no |
| 16886564 | FMNL2    | ENSG00000157827 | formin-like 2                                                  | no | no |
| 16850656 | FLJ35776 | ENSG00000177337 | uncharacterized LOC649446                                      | no | no |
| 16723662 | FJX1     | ENSG00000179431 | four jointed box 1                                             | no | no |
| 16768675 | FGD6     | ENSG00000180263 | FYVE, RhoGEF and PH domain containing 6                        | no | no |
| 17024448 | FBXO30   | ENSG00000118496 | F-box protein 30                                               | no | no |
| 16938724 | FBXL2    | ENSG00000153558 | F-box and leucine-rich repeat protein 2                        | no | no |
| 16726936 | FAM89B   | ENSG00000176973 | family with sequence similarity 89, member B                   | no | no |
| 17016221 | FAM65B   | ENSG00000111913 | family with sequence similarity 65, member B                   | no | no |
| 17021092 | FAM46A   | ENSG00000112773 | family with sequence similarity 46, member A                   | no | no |
| 16915009 | FAM210B  | ENSG00000124098 | family with sequence similarity 210, member B                  | no | no |
| 16739165 | FADS3    | ENSG00000221968 | fatty acid desaturase 3                                        | no | no |

|          |           |                 |                                                                    |    |    |
|----------|-----------|-----------------|--------------------------------------------------------------------|----|----|
| 16986417 | F2RL1     | ENSG00000164251 | coagulation factor II                                              | no | no |
| 16845410 | ETV4      | ENSG00000175832 | ets variant 4                                                      | no | no |
| 16811906 | ETFA      | ENSG00000140374 | electron-transfer-flavoprotein, alpha polypeptide                  | no | no |
| 16967843 | EREG      | ENSG00000124882 | epiregulin                                                         | no | no |
| 16998368 | ERAP1     | ENSG00000164307 | endoplasmic reticulum aminopeptidase 1                             | no | no |
| 16682098 | EPHA2     | ENSG00000142627 | EPH receptor A2                                                    | no | no |
| 17075529 | ENTPD4    | ENSG00000197217 | ectonucleoside triphosphate diphosphohydrolase 4                   | no | no |
| 16939479 | ENTPD3    | ENSG00000168032 | ectonucleoside triphosphate diphosphohydrolase 3                   | no | no |
| 16748590 | EMP1      | ENSG00000134531 | epithelial membrane protein 1                                      | no | no |
| 16996564 | ELOVL7    | ENSG00000164181 | ELOVL fatty acid elongase 7                                        | no | no |
| 16786548 | EIF2B2    | ENSG00000119718 | eukaryotic translation initiation factor 2B, subunit 2 beta, 39kDa | no | no |
| 16899032 | EGR4      | ENSG00000135625 | early growth response 4                                            | no | no |
| 17004903 | EDN1      | ENSG00000078401 | endothelin 1                                                       | no | no |
| 17070408 | E2F5      | ENSG00000133740 | E2F transcription factor 5, p130-binding                           | no | no |
| 16734271 | DUSP8     | ENSG00000184545 | dual specificity phosphatase 8                                     | no | no |
| 17075973 | DUSP4     | ENSG00000120875 | dual specificity phosphatase 4                                     | no | no |
| 16761631 | DUSP16    | ENSG00000111266 | dual specificity phosphatase 16                                    | no | no |
| 16699533 | DUSP10    | ENSG00000143507 | dual specificity phosphatase 10                                    | no | no |
| 16851866 | DTNA      | ENSG00000134769 | dystrobrevin, alpha                                                | no | no |
| 16854486 | DSC2      | ENSG00000134755 | desmocollin 2                                                      | no | no |
| 16799724 | DLL4      | ENSG00000128917 | delta-like 4                                                       | no | no |
| 16795285 | DIO2      | ENSG00000211448 | deiodinase, iodothyronine, type II                                 | no | no |
| 17073078 | DENND3    | ENSG00000105339 | DENN/MADD domain containing 3                                      | no | no |
| 16981266 | DDX60L    | ENSG00000181381 | DEAD                                                               | no | no |
| 16981219 | DDX60     | ENSG00000137628 | DEAD                                                               | no | no |
| 17027581 | DDR1      | ENSG00000204580 | discoidin domain receptor tyrosine kinase 1                        | no | no |
| 17033131 | DDR1      | ENSG00000204580 | discoidin domain receptor tyrosine kinase 1                        | no | no |
| 17037907 | DDR1      | ENSG00000204580 | discoidin domain receptor tyrosine kinase 1                        | no | no |
| 17030426 | DDR1      | ENSG00000204580 | discoidin domain receptor tyrosine kinase 1                        | no | no |
| 16829426 | DBNDD1    | ENSG00000003249 | dysbindin                                                          | no | no |
| 16969229 | DAPP1     | ENSG00000070190 | dual adaptor of phosphotyrosine and 3-phosphoinositides            | no | no |
| 16810473 | DAPK2     | ENSG00000035664 | death-associated protein kinase 2                                  | no | no |
| 16859132 | CYP4F3    | ENSG00000186529 | cytochrome P450, family 4, subfamily F, polypeptide 3              | no | no |
| 16977045 | CXCL9     | ENSG00000138755 | chemokine                                                          | no | no |
| 16840113 | CXCL16    | ENSG00000161921 | chemokine                                                          | no | no |
| 16977058 | CXCL11    | ENSG00000169248 | chemokine                                                          | no | no |
| 16921664 | CXADR     | ENSG00000154639 | coxsackie virus and adenovirus receptor                            | no | no |
| 16692834 | CTSS      | ENSG00000163131 | cathepsin S                                                        | no | no |
| 16812245 | CTSH      | ENSG00000103811 | cathepsin H                                                        | no | no |
| 16676547 | CTSE      | ENSG00000196188 | cathepsin E                                                        | no | no |
| 16992557 | CPEB4     | ENSG00000113742 | cytoplasmic polyadenylation element binding protein 4              | no | no |
| 17077974 | CPA6      | ENSG00000165078 | carboxypeptidase A6                                                | no | no |
| 16828826 | COTL1     | ENSG00000103187 | coactosin-like 1                                                   | no | no |
| 16766035 | CNPY2     | ENSG00000257727 | canopy 2 homolog                                                   | no | no |
| 16834243 | CNP       | ENSG00000260283 | 2',3'-cyclic nucleotide 3' phosphodiesterase                       | no | no |
| 16894127 | CMPK2     | ENSG00000134326 | cytidine monophosphate (UMP-CMP) kinase 2, mitochondrial           | no | no |
| 16815306 | CLDN9     | ENSG00000213937 | claudin 9                                                          | no | no |
| 16962661 | CLDN1     | ENSG00000163347 | claudin 1                                                          | no | no |
| 16740969 | CLCF1     | ENSG00000175505 | cardiotrophin-like cytokine factor 1                               | no | no |
| 16908822 | CHPF      | ENSG00000123989 | chondroitin polymerizing factor                                    | no | no |
| 17021437 | CGA       | ENSG00000135346 | glycoprotein hormones, alpha polypeptide                           | no | no |
| 16791898 | CFL2      | ENSG00000165410 | cofilin 2                                                          | no | no |
| 17006949 | CFB       | ENSG00000243649 | complement factor B                                                | no | no |
| 16841768 | CENPV     | ENSG00000166582 | centromere protein V                                               | no | no |
| 16738094 | CELF1     | ENSG00000149187 | CUGBP, Elav-like family member 1                                   | no | no |
| 16862563 | CEACAM6   | ENSG00000086548 | carcinoembryonic antigen-related cell adhesion molecule 6          | no | no |
| 16872803 | CEACAM1   | ENSG00000079385 | carcinoembryonic antigen-related cell adhesion molecule 1          | no | no |
| 16841660 | CDRT1     | NA              | CMT1A duplicated region transcript 1                               | no | no |
| 17008007 | CDKN1A    | ENSG00000124762 | cyclin-dependent kinase inhibitor 1A (p21, Cip1)                   | no | no |
| 16858970 | CD97      | ENSG00000123146 | CD97 molecule                                                      | no | no |
| 16737200 | CD59      | ENSG00000085063 | CD59 molecule, complement regulatory protein                       | no | no |
| 16860992 | CD22      | ENSG00000012124 | CD22 molecule                                                      | no | no |
| 17010354 | CD109     | ENSG00000156535 | CD109 molecule                                                     | no | no |
| 16833204 | CCL2      | ENSG00000108691 | chemokine                                                          | no | no |
| 16729693 | CCDC83    | ENSG00000150676 | coiled-coil domain containing 83                                   | no | no |
| 16855358 | CCDC68    | ENSG00000166510 | coiled-coil domain containing 68                                   | no | no |
| 16831527 | CCDC144A  | NA              | coiled-coil domain containing 144A                                 | no | no |
| 16831486 | CCDC144A  | ENSG00000170160 | coiled-coil domain containing 144A                                 | no | no |
| 16987468 | CAST      | ENSG00000153113 | calpastatin                                                        | no | no |
| 16677863 | CAPN2     | ENSG00000162909 | calpain 2, (m/II) large subunit                                    | no | no |
| 16765404 | CALCOCO1  | ENSG00000012822 | calcium binding and coiled-coil domain 1                           | no | no |
| 16744616 | CADM1     | ENSG00000182985 | cell adhesion molecule 1                                           | no | no |
| 16846711 | CACNA1G   | NA              | calcium channel, voltage-dependent, T type, alpha 1G subunit       | no | no |
| 16836655 | CA4       | ENSG00000167434 | carbonic anhydrase IV                                              | no | no |
| 17060481 | C7orf43   | ENSG00000146826 | chromosome 7 open reading frame 43                                 | no | no |
| 16989038 | C5orf56   | ENSG00000197536 | chromosome 5 open reading frame 56                                 | no | no |
| 16943919 | C3orf52   | ENSG00000114529 | chromosome 3 open reading frame 52                                 | no | no |
| 16681974 | C1orf126  | NA              | chromosome 1 open reading frame 126                                | no | no |
| 16858080 | C19orf66  | ENSG00000130813 | chromosome 19 open reading frame 66                                | no | no |
| 16861641 | C19orf33  | ENSG00000167644 | chromosome 19 open reading frame 33                                | no | no |
| 16800630 | C15orf48  | ENSG00000166920 | chromosome 15 open reading frame 48                                | no | no |
| 16712421 | C10orf113 | ENSG00000204683 | chromosome 10 open reading frame 113                               | no | no |
| 17005655 | BTN3A1    | ENSG00000026950 | butyrophilin, subfamily 3, member A1                               | no | no |
| 16664028 | BTBD19    | ENSG00000222009 | BTB                                                                | no | no |
| 16870200 | BST2      | ENSG00000130303 | bone marrow stromal cell antigen 2                                 | no | no |

|          |            |                 |                                                                                     |    |    |
|----------|------------|-----------------|-------------------------------------------------------------------------------------|----|----|
| 16925749 | BRWD1-IT2  | NA              | BRWD1 intronic transcript 2                                                         | no | no |
| 17048738 | BRI3       | ENSG00000164713 | brain protein I3                                                                    | no | no |
| 17048727 | BRI3       | ENSG00000164713 | brain protein I3                                                                    | no | no |
| 16762470 | BHLHE41    | ENSG00000123095 | basic helix-loop-helix family, member e41                                           | no | no |
| 16884335 | BCL2L11    | ENSG00000153094 | BCL2-like 11                                                                        | no | no |
| 16740238 | BATF2      | ENSG00000168062 | basic leucine zipper transcription factor, ATF-like 2                               | no | no |
| 16786616 | BATF       | ENSG00000156127 | basic leucine zipper transcription factor, ATF-like                                 | no | no |
| 16800450 | B2M        | ENSG00000166710 | beta-2-microglobulin                                                                | no | no |
| 16877097 | ATP6V1C2   | ENSG00000143882 | ATPase, H+ transporting, lysosomal 42kDa, V1 subunit C2                             | no | no |
| 16677278 | ATF3       | ENSG00000162772 | activating transcription factor 3                                                   | no | no |
| 16947607 | ARL14      | ENSG00000179674 | ADP-ribosylation factor-like 14                                                     | no | no |
| 16882999 | ARID5A     | ENSG00000196843 | AT rich interactive domain 5A                                                       | no | no |
| 16730429 | ARHGAP42   | ENSG00000165895 | Rho GTPase activating protein 42                                                    | no | no |
| 16845929 | ARHGAP27   | ENSG00000159314 | Rho GTPase activating protein 27                                                    | no | no |
| 16712531 | ARHGAP21   | ENSG00000107863 | Rho GTPase activating protein 21                                                    | no | no |
| 16975084 | ARAP2      | ENSG00000047365 | ArfGAP with RhoGAP domain, ankyrin repeat and PH domain 2                           | no | no |
| 16929615 | APOL6      | ENSG00000221963 | apolipoprotein L, 6                                                                 | no | no |
| 16929631 | APOL1      | ENSG00000100342 | apolipoprotein L                                                                    | no | no |
| 16980742 | ANXA2P1    | NA              | annexin A2 pseudogene 1                                                             | no | no |
| 16810065 | ANXA2      | ENSG00000182718 | annexin A2                                                                          | no | no |
| 16750325 | ANO6       | ENSG00000177119 | anoctamin 6                                                                         | no | no |
| 16857886 | ANGPTL4    | ENSG00000167772 | angiopoietin-like 4                                                                 | no | no |
| 16840817 | ALOXE3     | ENSG00000179148 | arachidonate lipoxygenase 3                                                         | no | no |
| 17051827 | AKR1B10    | ENSG00000198074 | aldo-keto reductase family 1, member B10                                            | no | no |
| 16946341 | ACPL2      | ENSG00000155893 | acid phosphatase-like 2                                                             | no | no |
| 16977868 | ABCG2      | ENSG00000118777 | ATP-binding cassette, sub-family G (WHITE), member 2                                | no | no |
| 16836021 | ABCC3      | ENSG00000108846 | ATP-binding cassette, sub-family C (CFTR/MRP), member 3                             | no | no |
| 16708192 | ABCC2      | ENSG00000023839 | ATP-binding cassette, sub-family C                                                  | no | no |
| 16816214 | ABCC1      | ENSG00000103222 | ATP-binding cassette, sub-family C                                                  | no | no |
| 16761012 | A2M        | ENSG00000175899 | alpha-2-macroglobulin                                                               | no | no |
| 16700987 | ---        | NA              | ENST00000516481                                                                     | no | no |
| 17009052 | ---        | NA              | ENST00000516409                                                                     | no | no |
| 16988085 | ---        | NA              | ENST00000515932                                                                     | no | no |
| 17076510 | ---        | NA              | ENST00000384470                                                                     | no | no |
| 16992322 | ---        | NA              | ENST00000384182                                                                     | no | no |
| 16917466 | ---        | NA              | ENST00000365390                                                                     | no | no |
| 16780891 | ---        | NA              | ENST00000364977                                                                     | no | no |
| 17008211 | ---        | NA              | ENST00000363836                                                                     | no | no |
| 17077308 | ---        | NA              | ENST00000362535                                                                     | no | no |
| 16821365 | ---        | NA              | AK127374                                                                            | no | no |
| 17121740 | KRT17P1    | NA              | keratin 17 pseudogene 1                                                             | no | no |
| 17121728 | USP32P2    | NA              | ubiquitin specific peptidase 32 pseudogene 2                                        | na | na |
| 17084428 | UBAP1      | ENSG00000165006 | ubiquitin associated protein 1                                                      | na | na |
| 17103951 | TSPYL2     | ENSG00000184205 | TSPY-like 2                                                                         | na | na |
| 17005836 | TRNAI6     | NA              | transfer RNA isoleucine 6                                                           | na | na |
| 17005782 | TRNAI2     | NA              | transfer RNA isoleucine 2                                                           | na | na |
| 17126024 | TRIM25     | NA              | tripartite motif containing 25                                                      | na | na |
| 17096436 | TRIM14     | ENSG00000106785 | tripartite motif containing 14                                                      | na | na |
| 17063838 | TRBV30     | NA              | T cell receptor beta variable 30                                                    | na | na |
| 17123266 | TRANK1     | NA              | tetratricopeptide repeat and ankyrin repeat containing 1                            | na | na |
| 17123262 | TRANK1     | NA              | tetratricopeptide repeat and ankyrin repeat containing 1                            | na | na |
| 17123260 | TRANK1     | NA              | tetratricopeptide repeat and ankyrin repeat containing 1                            | na | na |
| 17123268 | TRANK1     | NA              | tetratricopeptide repeat and ankyrin repeat containing 1                            | na | na |
| 16782010 | TRAJ59     | NA              | T cell receptor alpha joining 59                                                    | na | na |
| 17087588 | TMEFF1     | ENSG00000241697 | transmembrane protein with EGF-like and two follistatin-like domains 1              | na | na |
| 17103185 | TIMP1      | ENSG00000102265 | TIMP metalloproteinase inhibitor 1                                                  | na | na |
| 16882183 | TCF7L1-IT1 | NA              | TCF7L1 intronic transcript 1                                                        | na | na |
| 17105753 | TCEAL3     | ENSG00000196507 | transcription elongation factor A (SII)-like 3                                      | na | na |
| 16836868 | TANC2      | ENSG00000170921 | tetratricopeptide repeat, ankyrin repeat and coiled-coil containing 2               | na | na |
| 17102396 | TAB3       | NA              | TGF-beta activated kinase 1/MAP3K7 binding protein 3                                | na | na |
| 17120350 | SVIL       | NA              | supervillin                                                                         | na | na |
| 17097281 | SUSD1      | ENSG00000106868 | sushi domain containing 1                                                           | na | na |
| 16914743 | SNORD12B   | ENSG00000222365 | small nucleolar RNA, C/D box 12B                                                    | na | na |
| 17126034 | SLC38A2    | NA              | solute carrier family 38, member 2                                                  | na | na |
| 17126144 | SLC38A2    | NA              | solute carrier family 38, member 2                                                  | na | na |
| 16787902 | SERPINA3   | ENSG00000196136 | serpin peptidase inhibitor, clade A (alpha-1 antiproteinase, antitrypsin), member 3 | na | na |
| 17120452 | SDCBP      | NA              | syndecan binding protein (syntenin)                                                 | na | na |
| 17102129 | SAT1       | ENSG00000130066 | spermidine/spermine N1-acetyltransferase 1                                          | na | na |
| 16972293 | RNY4P17    | NA              | RNA, Ro-associated Y4 pseudogene 17                                                 | na | na |
| 16774764 | RNY3P2     | NA              | RNA, Ro-associated Y3 pseudogene 2                                                  | na | na |
| 16779278 | RNY1P6     | NA              | RNA, Ro-associated Y1 pseudogene 6                                                  | na | na |
| 16988295 | RNU7-34P   | NA              | RNA, U7 small nuclear 34 pseudogene                                                 | na | na |
| 16802100 | RNU5A-1    | ENSG00000199568 | RNA, U5A small nuclear 1                                                            | na | na |
| 16683607 | RCAN3AS    | NA              | RCAN3 antisense                                                                     | na | na |
| 17095194 | RASEF      | ENSG00000165105 | RAS and EF-hand domain containing                                                   | na | na |
| 17024695 | RAET1K     | ENSG00000218358 | retinoic acid early transcript 1K pseudogene                                        | na | na |
| 17099076 | PTGES      | ENSG00000148344 | prostaglandin E synthase                                                            | na | na |
| 17096091 | PTCH1      | ENSG00000185920 | patched 1                                                                           | na | na |
| 16872926 | PSG5       | ENSG00000204941 | pregnancy specific beta-1-glycoprotein 5                                            | na | na |
| 17125794 | PRSS3      | NA              | protease, serine, 3                                                                 | na | na |
| 17120704 | PPFIBP1    | NA              | PTPRF interacting protein, binding protein 1 (liprin beta 1)                        | na | na |
| 17120706 | PPFIBP1    | NA              | PTPRF interacting protein, binding protein 1 (liprin beta 1)                        | na | na |
| 17070926 | PDP1       | ENSG00000164951 | pyruvate dehydrogenase phosphatase catalytic subunit 1                              | na | na |
| 17111008 | NUDT11     | ENSG00000196368 | nudix (nucleoside diphosphate linked moiety X)-type motif 11                        | na | na |
| 17087517 | NR4A3      | ENSG00000119508 | nuclear receptor subfamily 4, group A, member 3                                     | na | na |

|          |             |                 |                                                                   |    |    |
|----------|-------------|-----------------|-------------------------------------------------------------------|----|----|
| 17101856 | NHS         | ENSG00000188158 | Nance-Horan syndrome (congenital cataracts and dental anomalies)  | na | na |
| 17095703 | NFIL3       | ENSG00000165030 | nuclear factor, interleukin 3 regulated                           | na | na |
| 17118190 | NEDD9       | NA              | neural precursor cell expressed, developmentally down-regulated 9 | na | na |
| 17118269 | NAMPT       | NA              | nicotinamide phosphoribosyltransferase                            | na | na |
| 16954295 | MST1R       | ENSG00000164078 | macrophage stimulating 1 receptor                                 | na | na |
| 16974175 | MIR95       | ENSG00000207807 | microRNA 95                                                       | na | na |
| 16712936 | MIR938      | ENSG00000216035 | microRNA 938                                                      | na | na |
| 16728384 | MIR548K     | ENSG00000221333 | microRNA 548k                                                     | na | na |
| 16956978 | MIR548AB    | ENSG00000265328 | microRNA 548ab                                                    | na | na |
| 16865044 | MIR523      | ENSG00000208016 | microRNA 523                                                      | na | na |
| 16865036 | MIR520A     | ENSG00000207594 | microRNA 520a                                                     | na | na |
| 17101871 | MIR4768     | ENSG00000265465 | microRNA 4768                                                     | na | na |
| 16800989 | MIR4712     | ENSG00000264109 | microRNA 4712                                                     | na | na |
| 16874265 | MIR4324     | ENSG00000265407 | microRNA 4324                                                     | na | na |
| 16782958 | MIR4307     | ENSG00000265165 | microRNA 4307                                                     | na | na |
| 16908880 | MIR4268     | ENSG00000266518 | microRNA 4268                                                     | na | na |
| 16919646 | MIR3617     | ENSG00000266071 | microRNA 3617                                                     | na | na |
| 16859800 | MIR3189     | ENSG00000264175 | microRNA 3189                                                     | na | na |
| 16804707 | MIR3174     | ENSG00000265871 | microRNA 3174                                                     | na | na |
| 16773222 | MIR2276     | ENSG00000252695 | microRNA 2276                                                     | na | na |
| 17110367 | MIR222      | ENSG00000207725 | microRNA 222                                                      | na | na |
| 17110365 | MIR221      | ENSG00000207870 | microRNA 221                                                      | na | na |
| 16700878 | MIR1537     | ENSG00000222831 | microRNA 1537                                                     | na | na |
| 16856166 | MIR1302-3   | NA              | microRNA 1302-3                                                   | na | na |
| 16657440 | MIR1302-11  | NA              | microRNA 1302-11                                                  | na | na |
| 16814060 | MIR1302-11  | NA              | microRNA 1302-11                                                  | na | na |
| 17082973 | MIR1302-11  | ENSG00000267588 | microRNA 1302-11                                                  | na | na |
| 16865100 | MIR1283-2   | ENSG00000221548 | microRNA 1283-2                                                   | na | na |
| 17072727 | MIR1207     | ENSG00000221176 | microRNA 1207                                                     | na | na |
| 16856483 | MIDN        | ENSG00000167470 | midnolin                                                          | na | na |
| 16694446 | MEX3A       | ENSG00000254726 | mex-3 homolog A                                                   | na | na |
| 16700875 | LYST-IT2    | NA              | LYST intronic transcript 2                                        | na | na |
| 16700872 | LYST-IT1    | NA              | LYST intronic transcript 1                                        | na | na |
| 16713048 | LOC10050550 | ENSG00000215288 | putative UPF0607 protein FLJ37424-like                            | na | na |
| 17005281 | LINC00340   | ENSG00000238274 | long intergenic non-protein coding RNA 340                        | na | na |
| 17121624 | LGALS9      | NA              | lectin, galactoside-binding, soluble, 9                           | na | na |
| 17121622 | LGALS9      | NA              | lectin, galactoside-binding, soluble, 9                           | na | na |
| 17124132 | LAP3        | NA              | leucine aminopeptidase 3                                          | na | na |
| 17115271 | L1CAM       | ENSG00000198910 | L1 cell adhesion molecule                                         | na | na |
| 16939768 | KRBOX1      | ENSG00000240747 | KRAB box domain containing 1                                      | na | na |
| 17111484 | ITIH6       | ENSG00000102313 | inter-alpha-trypsin inhibitor heavy chain family, member 6        | na | na |
| 16954620 | IQCF5       | ENSG00000214681 | IQ motif containing F5                                            | na | na |
| 17016760 | IFITM4P     | ENSG00000235821 | interferon induced transmembrane protein 4 pseudogene             | na | na |
| 17036173 | IFITM4P     | ENSG00000235821 | interferon induced transmembrane protein 4 pseudogene             | na | na |
| 17033890 | IFITM4P     | ENSG00000235821 | interferon induced transmembrane protein 4 pseudogene             | na | na |
| 17038932 | IFITM4P     | ENSG00000235821 | interferon induced transmembrane protein 4 pseudogene             | na | na |
| 17028653 | IFITM4P     | ENSG00000235821 | interferon induced transmembrane protein 4 pseudogene             | na | na |
| 17031434 | IFITM4P     | ENSG00000235821 | interferon induced transmembrane protein 4 pseudogene             | na | na |
| 17099027 | IERSL       | ENSG00000188483 | immediate early response 5-like                                   | na | na |
| 17114829 | IDS         | ENSG00000104004 | iduronate 2-sulfatase                                             | na | na |
| 17114241 | HS6ST2      | ENSG00000171004 | heparan sulfate 6-O-sulfotransferase 2                            | na | na |
| 17117871 | HMGA1       | NA              | high mobility group AT-hook 1                                     | na | na |
| 17041782 | HLA-C       | NA              | major histocompatibility complex, class I, C                      | na | na |
| 17029003 | HLA-C       | ENSG00000204525 | major histocompatibility complex, class I, C                      | na | na |
| 17039281 | HLA-C       | ENSG00000204525 | major histocompatibility complex, class I, C                      | na | na |
| 17031781 | HLA-C       | ENSG00000204525 | major histocompatibility complex, class I, C                      | na | na |
| 17036486 | HLA-C       | ENSG00000204525 | major histocompatibility complex, class I, C                      | na | na |
| 17034236 | HLA-C       | ENSG00000204525 | major histocompatibility complex, class I, C                      | na | na |
| 16793678 | HIF1A-AS2   | NA              | HIF1A antisense RNA 2                                             | na | na |
| 17035371 | HCP5        | ENSG00000206337 | HLA complex P5                                                    | na | na |
| 17040665 | HCP5        | ENSG00000206337 | HLA complex P5                                                    | na | na |
| 16921171 | HAR1B       | ENSG00000231133 | highly accelerated region 1B                                      | na | na |
| 16922007 | GRIK1-AS2   | ENSG00000156273 | GRIK1 antisense RNA 2                                             | na | na |
| 16922036 | GRIK1-AS2   | ENSG00000156273 | GRIK1 antisense RNA 2                                             | na | na |
| 17118868 | GPRC5A      | ENSG00000135888 | G protein-coupled receptor, family C, group 5, member A           | na | na |
| 16748529 | GPRC5A      | ENSG00000135888 | G protein-coupled receptor, family C, group 5, member A           | na | na |
| 17107765 | GPR50       | ENSG00000102195 | G protein-coupled receptor 50                                     | na | na |
| 17095423 | GOLM1       | ENSG00000135052 | golgi membrane protein 1                                          | na | na |
| 17096493 | GABBR2      | ENSG00000136928 | gamma-aminobutyric acid (GABA) B receptor, 2                      | na | na |
| 17107548 | FMR1-IT1    | NA              | FMR1 intronic transcript 1 (non-protein coding)                   | na | na |
| 17115505 | FLNA        | ENSG00000196924 | filamin A, alpha                                                  | na | na |
| 17093441 | FAM219A     | ENSG00000164970 | family with sequence similarity 219, member A                     | na | na |
| 17098506 | FAM129B     | ENSG00000136830 | family with sequence similarity 129, member B                     | na | na |
| 16983373 | FAM105A     | ENSG00000145569 | family with sequence similarity 105, member A                     | na | na |
| 16781181 | F10-AS1     | NA              | F10 antisense RNA 1                                               | na | na |
| 17080450 | EXT1        | ENSG00000182197 | exostosin 1                                                       | na | na |
| 17082362 | EPPK1       | ENSG00000227184 | epiplakin 1                                                       | na | na |
| 17084034 | ---         | NA              | TCONS_I2_00029687-XLOC_I2_014721                                  | na | na |
| 17065873 | ---         | NA              | TCONS_I2_00028471-XLOC_I2_014123                                  | na | na |
| 17048460 | ---         | NA              | TCONS_I2_00027176-XLOC_I2_013513                                  | na | na |
| 17020099 | ---         | NA              | TCONS_I2_00025400-XLOC_I2_013015                                  | na | na |
| 16985497 | ---         | NA              | TCONS_I2_00023403-XLOC_I2_011612                                  | na | na |
| 17041517 | ---         | NA              | TCONS_00030015-XLOC_014500                                        | na | na |
| 16935225 | ---         | NA              | TCONS_00029702-XLOC_014378                                        | na | na |
| 16931763 | ---         | NA              | TCONS_00029630-XLOC_014287                                        | na | na |

|              |    |                            |    |    |
|--------------|----|----------------------------|----|----|
| 16929362 --- | NA | TCONS_00029413-XLOC_014212 | na | na |
| 16926299 --- | NA | TCONS_00028955-XLOC_014115 | na | na |
| 16923543 --- | NA | TCONS_00028854-XLOC_013966 | na | na |
| 16914563 --- | NA | TCONS_00027938-XLOC_013544 | na | na |
| 16860308 --- | NA | TCONS_00026969-XLOC_013022 | na | na |
| 16850706 --- | NA | TCONS_00026269-XLOC_012617 | na | na |
| 16832334 --- | NA | TCONS_00025337-XLOC_012150 | na | na |
| 16842501 --- | NA | TCONS_00025219-XLOC_012422 | na | na |
| 16823901 --- | NA | TCONS_00024581-XLOC_011876 | na | na |
| 16821788 --- | NA | TCONS_00024512-XLOC_011828 | na | na |
| 16812362 --- | NA | TCONS_00023755-XLOC_011546 | na | na |
| 16809872 --- | NA | TCONS_00023687-XLOC_011486 | na | na |
| 16796588 --- | NA | TCONS_00022867-XLOC_011118 | na | na |
| 16794313 --- | NA | TCONS_00022777-XLOC_011061 | na | na |
| 16789605 --- | NA | TCONS_00022649-XLOC_010951 | na | na |
| 16785943 --- | NA | TCONS_00022548-XLOC_010866 | na | na |
| 16785509 --- | NA | TCONS_00022531-XLOC_010855 | na | na |
| 16780117 --- | NA | TCONS_00022076-XLOC_010679 | na | na |
| 16773960 --- | NA | TCONS_00021749-XLOC_010341 | na | na |
| 16773538 --- | NA | TCONS_00021737-XLOC_010326 | na | na |
| 16772265 --- | NA | TCONS_00020971-XLOC_010241 | na | na |
| 16762992 --- | NA | TCONS_00020754-XLOC_010043 | na | na |
| 16756209 --- | NA | TCONS_00020551-XLOC_009864 | na | na |
| 16754954 --- | NA | TCONS_00020502-XLOC_009823 | na | na |
| 16748965 --- | NA | TCONS_00020352-XLOC_009683 | na | na |
| 16748961 --- | NA | TCONS_00020351-XLOC_009682 | na | na |
| 16733848 --- | NA | TCONS_00020033-XLOC_009349 | na | na |
| 16745994 --- | NA | TCONS_00019800-XLOC_009599 | na | na |
| 16711276 --- | NA | TCONS_00018873-XLOC_008697 | na | na |
| 16712503 --- | NA | TCONS_00018451-XLOC_008748 | na | na |
| 16708086 --- | NA | TCONS_00018295-XLOC_008575 | na | na |
| 16707374 --- | NA | TCONS_00018284-XLOC_008562 | na | na |
| 16703595 --- | NA | TCONS_00018148-XLOC_008427 | na | na |
| 16703591 --- | NA | TCONS_00018147-XLOC_008426 | na | na |
| 16711413 --- | NA | TCONS_00017912-XLOC_008711 | na | na |
| 16707274 --- | NA | TCONS_00017854-XLOC_008556 | na | na |
| 16704261 --- | NA | TCONS_00017820-XLOC_008470 | na | na |
| 16714399 --- | NA | TCONS_00017736-XLOC_008823 | na | na |
| 17071447 --- | NA | TCONS_00014806-XLOC_006882 | na | na |
| 17072622 --- | NA | TCONS_00014545-XLOC_006920 | na | na |
| 17063097 --- | NA | TCONS_00013975-XLOC_006613 | na | na |
| 17052181 --- | NA | TCONS_00013609-XLOC_006275 | na | na |
| 17057714 --- | NA | TCONS_00013169-XLOC_006440 | na | na |
| 17025264 --- | NA | TCONS_00011605-XLOC_005901 | na | na |
| 17022205 --- | NA | TCONS_00011531-XLOC_005797 | na | na |
| 16987428 --- | NA | TCONS_00010749-XLOC_004478 | na | na |
| 16996424 --- | NA | TCONS_00010348-XLOC_004836 | na | na |
| 16983624 --- | NA | TCONS_00009912-XLOC_004324 | na | na |
| 16994693 --- | NA | TCONS_00009612-XLOC_004747 | na | na |
| 16985493 --- | NA | TCONS_00009410-XLOC_004410 | na | na |
| 16976894 --- | NA | TCONS_00008505-XLOC_003985 | na | na |
| 16968428 --- | NA | TCONS_00008143-XLOC_003595 | na | na |
| 16975590 --- | NA | TCONS_00007758-XLOC_003943 | na | na |
| 16966071 --- | NA | TCONS_00007517-XLOC_003515 | na | na |
| 16965603 --- | NA | TCONS_00007494-XLOC_003477 | na | na |
| 16961197 --- | NA | TCONS_00006706-XLOC_003320 | na | na |
| 16950343 --- | NA | TCONS_00006403-XLOC_003027 | na | na |
| 16949261 --- | NA | TCONS_00006340-XLOC_002956 | na | na |
| 16946817 --- | NA | TCONS_00006263-XLOC_002866 | na | na |
| 16955635 --- | NA | TCONS_00005779-XLOC_003140 | na | na |
| 16946821 --- | NA | TCONS_00005618-XLOC_002867 | na | na |
| 16948177 --- | NA | TCONS_00005441-XLOC_002934 | na | na |
| 16880780 --- | NA | TCONS_00005170-XLOC_002134 | na | na |
| 16903484 --- | NA | TCONS_00004473-XLOC_002353 | na | na |
| 16896955 --- | NA | TCONS_00004230-XLOC_002070 | na | na |
| 16883376 --- | NA | TCONS_00003790-XLOC_001587 | na | na |
| 16902143 --- | NA | TCONS_00003385-XLOC_002289 | na | na |
| 16897794 --- | NA | TCONS_00003286-XLOC_002099 | na | na |
| 16894119 --- | NA | TCONS_00003184-XLOC_001966 | na | na |
| 16883848 --- | NA | TCONS_00002963-XLOC_001605 | na | na |
| 16897869 --- | NA | TCONS_00002752-XLOC_002100 | na | na |
| 16664044 --- | NA | TCONS_00002016-XLOC_000166 | na | na |
| 16684439 --- | NA | TCONS_00001448-XLOC_000771 | na | na |
| 16681313 --- | NA | TCONS_00001384-XLOC_000695 | na | na |
| 16679691 --- | NA | TCONS_00001360-XLOC_000648 | na | na |
| 16675036 --- | NA | TCONS_00001221-XLOC_000494 | na | na |
| 16689866 --- | NA | TCONS_00000574-XLOC_000920 | na | na |
| 17034254 --- | NA | GQ141863                   | na | na |
| 17041800 --- | NA | GQ141863                   | na | na |
| 17039299 --- | NA | GQ141863                   | na | na |
| 16800662 --- | NA | ENST00000560225            | na | na |
| 16800880 --- | NA | ENST00000559620            | na | na |
| 16810019 --- | NA | ENST00000558749            | na | na |
| 16802601 --- | NA | ENST00000558429            | na | na |
| 16784661 --- | NA | ENST00000557322            | na | na |

|          |             |                 |                                                                   |    |    |
|----------|-------------|-----------------|-------------------------------------------------------------------|----|----|
| 16765686 | ---         | NA              | ENST00000556750                                                   | na | na |
| 16788033 | ---         | NA              | ENST00000555383                                                   | na | na |
| 16813459 | ---         | NA              | ENST00000555325                                                   | na | na |
| 16787676 | ---         | NA              | ENST00000554824                                                   | na | na |
| 16793674 | ---         | NA              | ENST00000554254                                                   | na | na |
| 16781423 | ---         | NA              | ENST00000551144                                                   | na | na |
| 16754387 | ---         | NA              | ENST00000549888                                                   | na | na |
| 16762483 | ---         | NA              | ENST00000545819                                                   | na | na |
| 16726332 | ---         | NA              | ENST00000544553                                                   | na | na |
| 16731490 | ---         | NA              | ENST00000544347                                                   | na | na |
| 16748122 | ---         | NA              | ENST00000538219                                                   | na | na |
| 16729665 | ---         | NA              | ENST00000532123                                                   | na | na |
| 16728386 | ---         | NA              | ENST00000531426                                                   | na | na |
| 16735653 | ---         | NA              | ENST00000531111                                                   | na | na |
| 16991626 | ---         | NA              | ENST00000522975                                                   | na | na |
| 17070217 | ---         | NA              | ENST00000520603                                                   | na | na |
| 17066240 | ---         | NA              | ENST00000519803                                                   | na | na |
| 16999303 | ---         | NA              | ENST00000519703                                                   | na | na |
| 17072396 | ---         | NA              | ENST00000518633                                                   | na | na |
| 17073368 | ---         | NA              | ENST00000517300                                                   | na | na |
| 16956605 | ---         | NA              | ENST00000517253                                                   | na | na |
| 17081160 | ---         | NA              | ENST00000517234                                                   | na | na |
| 16784938 | ---         | NA              | ENST00000517205                                                   | na | na |
| 16707452 | ---         | NA              | ENST00000517184                                                   | na | na |
| 17083845 | ---         | NA              | ENST00000517151                                                   | na | na |
| 16854393 | ---         | NA              | ENST00000517112                                                   | na | na |
| 16983456 | ---         | NA              | ENST00000517099                                                   | na | na |
| 16821970 | ---         | NA              | ENST00000517078                                                   | na | na |
| 16938427 | ---         | NA              | ENST00000517076                                                   | na | na |
| 16930568 | ---         | NA              | ENST00000517050                                                   | na | na |
| 16676641 | ---         | NA              | ENST00000517044                                                   | na | na |
| 17063003 | ---         | NA              | ENST00000517040                                                   | na | na |
| 16832216 | ---         | NA              | ENST00000517027                                                   | na | na |
| 16664567 | ---         | NA              | ENST00000517016                                                   | na | na |
| 16976027 | ---         | NA              | ENST00000517006                                                   | na | na |
| 16689445 | ---         | NA              | ENST00000516988                                                   | na | na |
| 16794145 | ---         | NA              | ENST00000516983                                                   | na | na |
| 16945445 | ---         | NA              | ENST00000516977                                                   | na | na |
| 16968370 | ---         | NA              | ENST00000516953                                                   | na | na |
| 17009459 | ---         | NA              | ENST00000516902                                                   | na | na |
| 16921662 | ---         | NA              | ENST00000516804                                                   | na | na |
| 17068712 | ---         | NA              | ENST00000516785                                                   | na | na |
| 16970859 | ---         | NA              | ENST00000516694                                                   | na | na |
| 16785140 | ---         | NA              | ENST00000516654                                                   | na | na |
| 17058303 | ---         | NA              | ENST00000516614                                                   | na | na |
| 16725095 | ---         | NA              | ENST00000516609                                                   | na | na |
| 16701005 | ---         | NA              | ENST00000516562                                                   | na | na |
| 16673879 | ---         | NA              | ENST00000516545                                                   | na | na |
| 16888956 | ---         | NA              | ENST00000516321                                                   | na | na |
| 16935318 | ---         | NA              | ENST00000516315                                                   | na | na |
| 16915104 | ---         | NA              | ENST00000516282                                                   | na | na |
| 16767744 | ---         | NA              | ENST00000516084                                                   | na | na |
| 16950836 | ---         | NA              | ENST00000515968                                                   | na | na |
| 16974581 | ---         | NA              | ENST00000515949                                                   | na | na |
| 17005894 | ZSCAN12P1   | ENSG00000219891 | zinc finger and SCAN domain containing 12 pseudogene 1            | na | na |
| 16960397 | WWTR1-IT1   | NA              | WWTR1 intronic transcript 1                                       | na | na |
| 16952557 | VIPR1-AS1   | NA              | VIPR1 antisense RNA 1                                             | na | na |
| 17062945 | LOC646329   | ENSG00000226380 | uncharacterized LOC646329                                         | na | na |
| 16921803 | LOC339622   | NA              | uncharacterized LOC339622                                         | na | na |
| 17065057 | LOC10050804 | NA              | uncharacterized LOC100508047                                      | na | na |
| 17024667 | LOC10050762 | NA              | uncharacterized LOC100507624                                      | na | na |
| 17077191 | LOC10050751 | NA              | uncharacterized LOC100507516                                      | na | na |
| 17063945 | LOC10050750 | ENSG00000232533 | uncharacterized LOC100507507                                      | na | na |
| 17081213 | LOC10050711 | NA              | uncharacterized LOC100507117                                      | na | na |
| 16825443 | LOC10050686 | NA              | uncharacterized LOC100506862                                      | na | na |
| 16998044 | LOC10050599 | ENSG00000248323 | uncharacterized LOC100505994                                      | na | na |
| 16962331 | LOC10050578 | NA              | uncharacterized LOC100505787                                      | na | na |
| 16872621 | LOC10050553 | NA              | uncharacterized LOC100505535                                      | na | na |
| 16813419 | LOC10014460 | ENSG00000258647 | uncharacterized LOC100144604                                      | na | na |
| 16756222 | IGANRP      | NA              | uncharacterized LOC100652933                                      | na | na |
| 17084025 | FLJ35282    | ENSG00000234840 | uncharacterized LOC441389                                         | na | na |
| 16785048 | FLJ22447    | ENSG00000232774 | uncharacterized LOC400221                                         | na | na |
| 17093186 | B4GALT1     | ENSG0000086062  | UDP-Gal:betaGlcNAc beta 1,4- galactosyltransferase, polypeptide 1 | na | na |
| 16859643 | B3GNT3      | ENSG00000179913 | UDP-GlcNAc:betaGal beta-1,3-N-acetylglucosaminyltransferase 3     | na | na |
| 16780169 | RNU6-75     | ENSG00000251753 | ---                                                               | na | na |
| 16878729 | RN5S90      | NA              | ---                                                               | na | na |
| 16895266 | RN5S88      | NA              | ---                                                               | na | na |
| 16698417 | RN5S75      | NA              | ---                                                               | na | na |
| 16929197 | RN5S496     | NA              | ---                                                               | na | na |
| 16828732 | RN5S432     | NA              | ---                                                               | na | na |
| 16818594 | RN5S422     | NA              | ---                                                               | na | na |
| 16786650 | RN5S387     | NA              | ---                                                               | na | na |
| 16781462 | RN5S380     | NA              | ---                                                               | na | na |
| 16772702 | RN5S379     | NA              | ---                                                               | na | na |
| 16763095 | RN5S359     | NA              | ---                                                               | na | na |

|          |            |                 |                                                           |    |    |
|----------|------------|-----------------|-----------------------------------------------------------|----|----|
| 16705024 | RN5S318    | NA              | ---                                                       | na | na |
| 17078887 | RN5S272    | NA              | ---                                                       | na | na |
| 17015138 | RN5S201    | NA              | ---                                                       | na | na |
| 16974315 | RN5S155    | NA              | ---                                                       | na | na |
| 16964904 | RN5S152    | NA              | ---                                                       | na | na |
| 16959505 | RN5S141    | NA              | ---                                                       | na | na |
| 16958425 | RN5S137    | NA              | ---                                                       | na | na |
| 16907780 | RN5S117    | NA              | ---                                                       | na | na |
| 16886654 | RN5S107    | NA              | ---                                                       | na | na |
| 17118792 | MIR612     | NA              | ---                                                       | na | na |
| 17126284 | LOC731656  | NA              | ---                                                       | na | na |
| 17124904 | LOC646329  | NA              | ---                                                       | na | na |
| 17124806 | LOC646329  | NA              | ---                                                       | na | na |
| 17122484 | LOC541471  | NA              | ---                                                       | na | na |
| 17087209 | LOC441455  | ENSG00000233820 | ---                                                       | na | na |
| 17126140 | LOC1006530 | NA              | ---                                                       | na | na |
| 17117406 | LOC1005076 | ENSG00000269624 | ---                                                       | na | na |
| 17117874 | LOC1005073 | NA              | ---                                                       | na | na |
| 17092415 | LOC1005062 | NA              | ---                                                       | na | na |
| 17125156 | LOC1005061 | NA              | ---                                                       | na | na |
| 17123814 | LOC1005058 | NA              | ---                                                       | na | na |
| 17122674 | LOC1002164 | NA              | ---                                                       | na | na |
| 17100797 | LOC1001340 | NA              | ---                                                       | na | na |
| 17085399 | KGFLP1     | ENSG00000227449 | ---                                                       | na | na |
| 17110372 | FLJ25917   | NA              | ---                                                       | na | na |
| 17121072 | FLJ22447   | NA              | ---                                                       | na | na |
| 17117867 | EPAS1      | NA              | endothelial PAS domain protein 1                          | na | na |
| 16865009 | DPRX       | ENSG00000204595 | divergent-paired related homeobox                         | na | na |
| 17116748 | DHRX       | ENSG00000169084 | dehydrogenase/reductase (SDR family) X-linked             | na | na |
| 17093090 | DDX58      | ENSG00000107201 | DEAD (Asp-Glu-Ala-Asp) box polypeptide 58                 | na | na |
| 16924461 | D21S2088E  | ENSG00000228592 | D21S2088E                                                 | na | na |
| 17105224 | CPXCR1     | ENSG00000147183 | CPX chromosome region, candidate 1                        | na | na |
| 17123460 | CPHL1P     | NA              | ceruloplasmin and hephaestin-like 1 pseudogene            | na | na |
| 17123458 | CPHL1P     | NA              | ceruloplasmin and hephaestin-like 1 pseudogene            | na | na |
| 16907225 | CFLAR-AS1  | ENSG00000226312 | CFLAR antisense RNA 1                                     | na | na |
| 17092901 | CDKN2B     | ENSG00000147883 | cyclin-dependent kinase inhibitor 2B (p15, inhibits CDK4) | na | na |
| 17096213 | CDC14B     | ENSG00000081377 | cell division cycle 14B                                   | na | na |
| 17118419 | CDC14B     | ENSG00000081377 | cell division cycle 14B                                   | na | na |
| 16699672 | CAPN8      | ENSG00000203697 | calpain 8                                                 | na | na |
| 17093042 | C9orf72    | ENSG00000147894 | chromosome 9 open reading frame 72                        | na | na |
| 17090042 | C9orf106   | NA              | chromosome 9 open reading frame 106                       | na | na |
| 16999432 | C5orf63    | ENSG00000164241 | chromosome 5 open reading frame 63                        | na | na |
| 16964100 | C4orf48    | ENSG00000243449 | chromosome 4 open reading frame 48                        | na | na |
| 17105694 | BEX4       | ENSG00000102409 | brain expressed, X-linked 4                               | na | na |
| 17121380 | BCAP31     | NA              | B-cell receptor-associated protein 31                     | na | na |
| 17121378 | BCAP31     | NA              | B-cell receptor-associated protein 31                     | na | na |
| 17121504 | BCAP31     | NA              | B-cell receptor-associated protein 31                     | na | na |
| 17125032 | ASNS       | NA              | asparagine synthetase (glutamine-hydrolyzing)             | na | na |
| 17125034 | ASNS       | NA              | asparagine synthetase (glutamine-hydrolyzing)             | na | na |
| 17125030 | ASNS       | NA              | asparagine synthetase (glutamine-hydrolyzing)             | na | na |
| 16957766 | ARHGAP31-A | NA              | ARHGAP31 antisense RNA 1                                  | na | na |
| 17093245 | AQP3       | ENSG00000165272 | aquaporin 3 (Gill blood group)                            | na | na |
| 17122620 | AOX2P      | NA              | aldehyde oxidase 2 pseudogene                             | na | na |
| 17084363 | ANXA2P2    | ENSG00000231991 | annexin A2 pseudogene 2                                   | na | na |
| 16657598 | AGRN       | ENSG00000188157 | agrin                                                     | na | na |
| 16794318 | ADAM20P1   | ENSG00000259158 | ADAM metallopeptidase domain 20 pseudogene 1              | na | na |
| 17109780 | ACOT9      | ENSG00000123130 | acyl-CoA thioesterase 9                                   | na | na |
| 17108096 | ABCD1      | ENSG00000101986 | ATP-binding cassette, sub-family D (ALD), member 1        | na | na |
| 16941942 | ---        | NA              | ENST00000472243                                           | na | na |
| 17063571 | ---        | NA              | ENST00000459596                                           | na | na |
| 16711362 | ---        | NA              | ENST00000459536                                           | na | na |
| 16700419 | ---        | NA              | ENST00000459395                                           | na | na |
| 16827677 | ---        | NA              | ENST00000459361                                           | na | na |
| 16886675 | ---        | NA              | ENST00000459359                                           | na | na |
| 16686988 | ---        | NA              | ENST00000459356                                           | na | na |
| 16972245 | ---        | NA              | ENST00000459352                                           | na | na |
| 16715474 | ---        | NA              | ENST00000459292                                           | na | na |
| 16875032 | ---        | NA              | ENST00000459287                                           | na | na |
| 17007656 | ---        | NA              | ENST00000459226                                           | na | na |
| 16881902 | ---        | NA              | ENST00000459211                                           | na | na |
| 17051573 | ---        | NA              | ENST00000459210                                           | na | na |
| 16805159 | ---        | NA              | ENST00000459209                                           | na | na |
| 16768526 | ---        | NA              | ENST00000459190                                           | na | na |
| 16966932 | ---        | NA              | ENST00000459077                                           | na | na |
| 16902355 | ---        | NA              | ENST00000459010                                           | na | na |
| 16985031 | ---        | NA              | ENST00000458977                                           | na | na |
| 17055002 | ---        | NA              | ENST00000458975                                           | na | na |
| 16903288 | ---        | NA              | ENST00000458963                                           | na | na |
| 16886999 | ---        | NA              | ENST00000458927                                           | na | na |
| 16890817 | ---        | NA              | ENST00000458869                                           | na | na |
| 16763054 | ---        | NA              | ENST00000458854                                           | na | na |
| 16660732 | ---        | NA              | ENST00000458849                                           | na | na |
| 16913303 | ---        | NA              | ENST00000458846                                           | na | na |
| 17010989 | ---        | NA              | ENST00000458799                                           | na | na |
| 16759716 | ---        | NA              | ENST00000458783                                           | na | na |

|              |    |                 |    |    |
|--------------|----|-----------------|----|----|
| 16674841 --- | NA | ENST00000457852 | na | na |
| 16774991 --- | NA | ENST00000456688 | na | na |
| 16673940 --- | NA | ENST00000452366 | na | na |
| 17005108 --- | NA | ENST00000450930 | na | na |
| 16718381 --- | NA | ENST00000445730 | na | na |
| 16810037 --- | NA | ENST00000441746 | na | na |
| 16710585 --- | NA | ENST00000433110 | na | na |
| 16883530 --- | NA | ENST00000430586 | na | na |
| 16659856 --- | NA | ENST00000426353 | na | na |
| 16706236 --- | NA | ENST00000426210 | na | na |
| 16968047 --- | NA | ENST00000425645 | na | na |
| 16776703 --- | NA | ENST00000419448 | na | na |
| 17012428 --- | NA | ENST00000417390 | na | na |
| 16910715 --- | NA | ENST00000412497 | na | na |
| 16833409 --- | NA | ENST00000411323 | na | na |
| 16865840 --- | NA | ENST00000411128 | na | na |
| 17043942 --- | NA | ENST00000411098 | na | na |
| 16928965 --- | NA | ENST00000410983 | na | na |
| 17023231 --- | NA | ENST00000410727 | na | na |
| 17005294 --- | NA | ENST00000410583 | na | na |
| 16726722 --- | NA | ENST00000410545 | na | na |
| 16705354 --- | NA | ENST00000410439 | na | na |
| 16813658 --- | NA | ENST00000410429 | na | na |
| 16716293 --- | NA | ENST00000410260 | na | na |
| 16854924 --- | NA | ENST00000410247 | na | na |
| 16823210 --- | NA | ENST00000408792 | na | na |
| 16719480 --- | NA | ENST00000408790 | na | na |
| 17077310 --- | NA | ENST00000408728 | na | na |
| 16792285 --- | NA | ENST00000408718 | na | na |
| 16983538 --- | NA | ENST00000408688 | na | na |
| 17056738 --- | NA | ENST00000408634 | na | na |
| 16778065 --- | NA | ENST00000408592 | na | na |
| 16860300 --- | NA | ENST00000408551 | na | na |
| 16852681 --- | NA | ENST00000408544 | na | na |
| 16964530 --- | NA | ENST00000408374 | na | na |
| 16907861 --- | NA | ENST00000408362 | na | na |
| 16950987 --- | NA | ENST00000408341 | na | na |
| 16882028 --- | NA | ENST00000408252 | na | na |
| 16761581 --- | NA | ENST00000408201 | na | na |
| 16778229 --- | NA | ENST00000408173 | na | na |
| 16690128 --- | NA | ENST00000401248 | na | na |
| 16942699 --- | NA | ENST00000391283 | na | na |
| 16849306 --- | NA | ENST00000391116 | na | na |
| 16804139 --- | NA | ENST00000391072 | na | na |
| 16688525 --- | NA | ENST00000391064 | na | na |
| 16970215 --- | NA | ENST00000391057 | na | na |
| 16907718 --- | NA | ENST00000390944 | na | na |
| 17020729 --- | NA | ENST00000390810 | na | na |
| 16959176 --- | NA | ENST00000390784 | na | na |
| 16908133 --- | NA | ENST00000390766 | na | na |
| 16789101 --- | NA | ENST00000390701 | na | na |
| 16996410 --- | NA | ENST00000384563 | na | na |
| 16951752 --- | NA | ENST00000384521 | na | na |
| 16814135 --- | NA | ENST00000384514 | na | na |
| 16886306 --- | NA | ENST00000384496 | na | na |
| 17072632 --- | NA | ENST00000384409 | na | na |
| 16811168 --- | NA | ENST00000384391 | na | na |
| 16794156 --- | NA | ENST00000384361 | na | na |
| 16996066 --- | NA | ENST00000384332 | na | na |
| 16693171 --- | NA | ENST00000384253 | na | na |
| 16851395 --- | NA | ENST00000384100 | na | na |
| 17007699 --- | NA | ENST00000383990 | na | na |
| 16848729 --- | NA | ENST00000383986 | na | na |
| 16694611 --- | NA | ENST00000383924 | na | na |
| 17056244 --- | NA | ENST00000383896 | na | na |
| 16989052 --- | NA | ENST00000365663 | na | na |
| 17055004 --- | NA | ENST00000365403 | na | na |
| 16840609 --- | NA | ENST00000365381 | na | na |
| 17054948 --- | NA | ENST00000365120 | na | na |
| 16884627 --- | NA | ENST00000364935 | na | na |
| 16831612 --- | NA | ENST00000364871 | na | na |
| 16889344 --- | NA | ENST00000364867 | na | na |
| 16889249 --- | NA | ENST00000364779 | na | na |
| 17080058 --- | NA | ENST00000364757 | na | na |
| 16760838 --- | NA | ENST00000364679 | na | na |
| 16991834 --- | NA | ENST00000364604 | na | na |
| 16675032 --- | NA | ENST00000364551 | na | na |
| 16911593 --- | NA | ENST00000364310 | na | na |
| 16895429 --- | NA | ENST00000364290 | na | na |
| 17083853 --- | NA | ENST00000364248 | na | na |
| 16816625 --- | NA | ENST00000364023 | na | na |
| 16834898 --- | NA | ENST00000364018 | na | na |
| 16836765 --- | NA | ENST00000363972 | na | na |
| 16848464 --- | NA | ENST00000363913 | na | na |
| 17044007 --- | NA | ENST00000363883 | na | na |



|              |                 |                 |    |    |
|--------------|-----------------|-----------------|----|----|
| 17065933 --- | NA              | ENST00000363760 | na | na |
| 16751163 --- | NA              | ENST00000363558 | na | na |
| 16685477 --- | NA              | ENST00000363551 | na | na |
| 16998508 --- | NA              | ENST00000363481 | na | na |
| 16742333 --- | NA              | ENST00000363386 | na | na |
| 16801602 --- | NA              | ENST00000363382 | na | na |
| 16871640 --- | NA              | ENST00000363309 | na | na |
| 16729538 --- | NA              | ENST00000363276 | na | na |
| 16817318 --- | NA              | ENST00000363268 | na | na |
| 16770505 --- | NA              | ENST00000363029 | na | na |
| 16809919 --- | NA              | ENST00000362860 | na | na |
| 17049060 --- | NA              | ENST00000362841 | na | na |
| 16732732 --- | NA              | ENST00000362839 | na | na |
| 16815903 --- | NA              | ENST00000362798 | na | na |
| 16854299 --- | NA              | ENST00000362496 | na | na |
| 17011669 --- | NA              | ENST00000362490 | na | na |
| 16919343 --- | NA              | ENST00000362417 | na | na |
| 16754956 --- | NA              | ENST00000362375 | na | na |
| 16741435 --- | NA              | ENST00000324630 | na | na |
| 16932081 --- | NA              | BX648058        | na | na |
| 16659904 --- | NA              | AK097742        | na | na |
| 17074911 --- | NA              | AK054741        | na | na |
| 17007632 --- | NA              | AK026168        | na | na |
| 17023465 --- | NA              | AK025196        | na | na |
| 17023467 --- | NA              | AK022139        | na | na |
| 16660518 --- | NA              | AF086337        | na | na |
| 17101873 --- | NA              | ---             | na | na |
| 17117112 --- | NA              | ---             | na | na |
| 17100895 --- | NA              | ---             | na | na |
| 17084235 --- | NA              | ---             | na | na |
| 17114687 --- | NA              | ---             | na | na |
| 17087979 --- | NA              | ---             | na | na |
| 17118142 --- | NA              | ---             | na | na |
| 17087008 --- | NA              | ---             | na | na |
| 17117807 --- | NA              | ---             | na | na |
| 17112572 --- | NA              | ---             | na | na |
| 17093315 --- | NA              | ---             | na | na |
| 17116820 --- | NA              | ---             | na | na |
| 17098182 --- | NA              | ---             | na | na |
| 17089847 --- | NA              | ---             | na | na |
| 17086594 --- | NA              | ---             | na | na |
| 17095772 --- | NA              | ---             | na | na |
| 17107021 --- | NA              | ---             | na | na |
| 17109107 --- | NA              | ---             | na | na |
| 17124612 --- | NA              | ---             | na | na |
| 17120688 --- | NA              | ---             | na | na |
| 17122592 --- | NA              | ---             | na | na |
| 17123264 --- | NA              | ---             | na | na |
| 17123270 --- | NA              | ---             | na | na |
| 17124256 --- | NA              | ---             | na | na |
| 17118996 --- | NA              | ---             | na | na |
| 17124726 --- | NA              | ---             | na | na |
| 17125162 --- | NA              | ---             | na | na |
| 17125028 --- | NA              | ---             | na | na |
| 17125668 --- | NA              | ---             | na | na |
| 17120208 --- | NA              | ---             | na | na |
| 17120898 --- | NA              | ---             | na | na |
| 17123256 --- | NA              | ---             | na | na |
| 17121358 --- | NA              | ---             | na | na |
| 17123822 --- | NA              | ---             | na | na |
| 17119922 --- | NA              | ---             | na | na |
| 17125306 --- | NA              | ---             | na | na |
| 17120248 --- | NA              | ---             | na | na |
| 17122748 --- | NA              | ---             | na | na |
| 17124810 --- | NA              | ---             | na | na |
| 17119060 --- | NA              | ---             | na | na |
| 17119502 --- | NA              | ---             | na | na |
| 17119538 --- | NA              | ---             | na | na |
| 17123892 --- | NA              | ---             | na | na |
| 17123894 --- | NA              | ---             | na | na |
| 17119430 --- | NA              | ---             | na | na |
| 17122488 --- | NA              | ---             | na | na |
| 17124878 --- | NA              | ---             | na | na |
| 17122070 --- | NA              | ---             | na | na |
| 17118874 --- | NA              | ---             | na | na |
| 17125036 --- | NA              | ---             | na | na |
| 17119918 --- | NA              | ---             | na | na |
| 17125150 --- | NA              | ---             | na | na |
| 17120180 --- | NA              | ---             | na | na |
| 17125302 --- | NA              | ---             | na | na |
| 16826072 --- | ENSG00000260402 | ---             | na | na |
| 17023994 --- | ENSG00000227844 | ---             | na | na |
| 17083988 --- | ENSG00000099810 | ---             | na | na |

**Table S5. Gene listing comparing PKC-θ binding regions by ChIP sequencing with gene expression microarray analysis from HMLE-IM and MCF-IM.**

| space | start     | end       | ensembl_gene_id | external_ξ | description         | region | ZINBA ζ | Callec | reads | reads | TGF | PMA | CSC  | PKC dependent |
|-------|-----------|-----------|-----------------|------------|---------------------|--------|---------|--------|-------|-------|-----|-----|------|---------------|
| chr1  | 20959376  | 20960625  | ENSG00000158828 | PINK1      | PTEN induced put    | 5UTR   | 0.004   | NO     | 1.42  | 2.89  | up  | up  | down | no            |
| chr22 | 29195876  | 29197375  | ENSG00000100219 | XBP1       | X-box binding pro   | 5UTR   | 0.000   | NO     | 3.90  | 5.37  | up  | up  | down | no            |
| chr8  | 124552751 | 124554250 | ENSG00000156804 | FBXO32     | F-box protein 32    | 5UTR   | 0.000   | YES    | 3.19  | 9.29  | up  | up  | -    | yes           |
| chr19 | 12901501  | 12903125  | ENSG00000171223 | JUNB       | jun B proto-onco    | 5UTR   | 0.000   | YES    | 2.98  | 5.99  | up  | up  | -    | yes           |
| chr19 | 12903876  | 12905125  | ENSG00000171223 | JUNB       | jun B proto-onco    | 3UTR   | 0.000   | NO     | 2.76  | 3.30  | up  | up  | -    | yes           |
| chr20 | 56222251  | 56223500  | ENSG00000124225 | PMEPA1     | prostate transme    | 3UTR   | 0.045   | NO     | 1.70  | 5.16  | up  | up  | -    | yes           |
| chr3  | 5027001   | 5028250   | ENSG00000134107 | BHLHE40    | basic helix-loop-h  | 3UTR   | 0.012   | NO     | 2.13  | 4.75  | up  | up  | -    | yes           |
| chr20 | 56284251  | 56285625  | ENSG00000124225 | PMEPA1     | prostate transme    | 5UTR   | 0.007   | NO     | 3.19  | 6.40  | up  | up  | -    | yes           |
| chr3  | 5020751   | 5022000   | ENSG00000134107 | BHLHE40    | basic helix-loop-h  | 5UTR   | 0.005   | NO     | 2.20  | 7.23  | up  | up  | -    | yes           |
| chr5  | 179246001 | 179247250 | ENSG00000161011 | SQSTM1     | sequestosome 1      | 5UTR   | 0.023   | NO     | 1.42  | 4.75  | up  | up  | -    | yes           |
| chr1  | 183109001 | 183110250 | ENSG00000135862 | LAMC1      | laminin, gamma 1    | exon   | 0.013   | NO     | 0.57  | 2.06  | up  | up  | -    | yes           |
| chr20 | 56261376  | 56262625  | ENSG00000124225 | PMEPA1     | prostate transme    | intron | 0.018   | NO     | 1.98  | 5.16  | up  | up  | -    | yes           |
| chr3  | 171881126 | 171882375 | ENSG00000075420 | FNDC3B     | fibronectin type II | intron | 0.034   | NO     | 0.78  | 2.48  | up  | up  | -    | yes           |
| chr8  | 124535876 | 124537125 | ENSG00000156804 | FBXO32     | F-box protein 32    | intron | 0.049   | NO     | 1.28  | 2.48  | up  | up  | -    | yes           |
| chr1  | 9883626   | 9885000   | ENSG00000171603 | CLSTN1     | calsyntenin 1       | 5UTR   | 0.000   | YES    | 2.41  | 5.57  | up  | up  | -    | no            |
| chr10 | 134144501 | 134146625 | ENSG00000148814 | LRRC27     | leucine rich repea  | 5UTR   | 0.000   | YES    | 24.32 | 59.87 | up  | up  | -    | no            |
| chr12 | 132378501 | 132379875 | ENSG00000177169 | ULK1       | unc-51-like kinase  | 5UTR   | 0.000   | YES    | 2.06  | 8.46  | up  | up  | -    | no            |
| chr17 | 58754501  | 58755875  | ENSG00000141376 | BCAS3      | breast carcinoma    | 5UTR   | 0.001   | YES    | 29.14 | 42.53 | up  | up  | -    | no            |
| chr17 | 58822626  | 58824125  | ENSG00000141376 | BCAS3      | breast carcinoma    | intron | 0.007   | YES    | 12.97 | 14.24 | up  | up  | -    | no            |
| chr2  | 20646126  | 20647625  | ENSG00000143878 | RHOB       | ras homolog fami    | 5UTR   | 0.000   | YES    | 4.75  | 8.67  | up  | up  | -    | no            |
| chr2  | 71294876  | 71296375  | ENSG00000124357 | NAGK       | N-acetylglucosam    | 5UTR   | 0.000   | YES    | 7.16  | 17.34 | up  | up  | -    | no            |
| chr1  | 114518001 | 114519250 | ENSG00000163349 | HIPK1      | homeodomain int     | 3UTR   | 0.042   | NO     | 5.32  | 7.23  | up  | up  | -    | no            |
| chr1  | 25756501  | 25757875  | ENSG00000204178 | TMEM57     | transmembrane ζ     | 5UTR   | 0.005   | NO     | 2.41  | 2.89  | up  | up  | -    | no            |
| chr15 | 63339876  | 63341250  | ENSG00000140416 | TPM1       | tropomyosin 1 (al   | 5UTR   | 0.001   | NO     | 1.56  | 4.75  | up  | up  | -    | no            |
| chr16 | 56965251  | 56966625  | ENSG00000051108 | HERPUD1    | homocysteine-inc    | 5UTR   | 0.001   | NO     | 2.48  | 4.13  | up  | up  | -    | no            |
| chr4  | 2263251   | 2264750   | ENSG00000123933 | MXD4       | MAX dimerizatio     | 5UTR   | 0.000   | NO     | 1.84  | 4.13  | up  | up  | -    | no            |
| chr12 | 51476626  | 51477875  | ENSG00000110925 | CSRNP2     | cysteine-serine-ri  | exon   | 0.003   | NO     | 2.34  | 4.75  | up  | up  | -    | no            |
| chr4  | 39639751  | 39641375  | ENSG00000163683 | SMIM14     | small integral me   | exon   | 0.000   | NO     | 2.91  | 6.40  | up  | up  | -    | no            |
| chr1  | 114479001 | 114480250 | ENSG00000163349 | HIPK1      | homeodomain int     | intron | 0.039   | NO     | 3.54  | 5.16  | up  | up  | -    | no            |

|       |           |           |                 |         |                      |         |       |     |       |       |    |      |      |    |
|-------|-----------|-----------|-----------------|---------|----------------------|---------|-------|-----|-------|-------|----|------|------|----|
| chr1  | 114502376 | 114503625 | ENSG00000163349 | HIPK1   | homeodomain int      | intron  | 0.021 | NO  | 5.95  | 6.19  | up | up   | -    | no |
| chr1  | 183683126 | 183684375 | ENSG00000143344 | RGL1    | ral guanine nucle    | intron  | 0.026 | NO  | 0.43  | 2.06  | up | up   | -    | no |
| chr17 | 58853001  | 58854250  | ENSG00000141376 | BCAS3   | breast carcinoma     | intron  | 0.005 | NO  | 4.68  | 6.81  | up | up   | -    | no |
| chr17 | 58832001  | 58833250  | ENSG00000141376 | BCAS3   | breast carcinoma     | intron  | 0.048 | NO  | 9.50  | 11.15 | up | up   | -    | no |
| chr17 | 59341126  | 59342375  | ENSG00000141376 | BCAS3   | breast carcinoma     | intron  | 0.018 | NO  | 6.45  | 7.23  | up | up   | -    | no |
| chr17 | 58866376  | 58867625  | ENSG00000141376 | BCAS3   | breast carcinoma     | intron  | 0.033 | NO  | 8.22  | 8.46  | up | up   | -    | no |
| chr17 | 59342626  | 59343875  | ENSG00000141376 | BCAS3   | breast carcinoma     | intron  | 0.008 | NO  | 12.26 | 11.97 | up | up   | -    | no |
| chr20 | 60092626  | 60094000  | ENSG00000179242 | CDH4    | cadherin 4, type 1   | intron  | 0.004 | NO  | 0.71  | 2.48  | up | up   | -    | no |
| chr19 | 11265876  | 11267375  | ENSG00000161888 | SPC24   | SPC24, NDC80 kin     | 5UTR    | 0.000 | YES | 2.69  | 4.54  | up | dowr | down | no |
| chr17 | 7387126   | 7388625   | ENSG00000181222 | POLR2A  | polymerase (RNA      | 5UTR    | 0.001 | NO  | 3.47  | 5.57  | up | dowr | down | no |
| chr19 | 20149626  | 20151000  | ENSG00000197124 | ZNF682  | zinc finger protei   | 5UTR    | 0.003 | NO  | 0.92  | 2.48  | up | dowr | down | no |
| chr5  | 169010001 | 169011375 | ENSG00000040275 | SPDL1   | spindle apparatus    | 5UTR    | 0.000 | NO  | 1.91  | 3.72  | up | dowr | down | no |
| chr6  | 33167501  | 33168750  | ENSG00000112473 | SLC39A7 | solute carrier fam   | 5UTR    | 0.012 | NO  | 1.70  | 5.78  | up | dowr | down | no |
| chr1  | 215188126 | 215189375 | ENSG00000082482 | KCNK2   | potassium channe     | intron  | 0.015 | NO  | 1.98  | 3.30  | up | dowr | down | no |
| chr1  | 85884251  | 85885500  | ENSG00000153904 | DDAH1   | dimethylarginine     | intron  | 0.045 | NO  | 0.85  | 2.06  | up | dowr | down | no |
| chr5  | 112042501 | 112043875 | ENSG00000134982 | APC     | adenomatous pol      | 5UTR    | 0.001 | YES | 2.06  | 4.95  | up | dowr | -    | no |
| chr6  | 30709376  | 30710625  | ENSG00000137312 | FLOT1   | flotillin 1 [Source: | 5UTR    | 0.001 | YES | 4.75  | 8.05  | up | dowr | -    | no |
| chr6  | 30709751  | 30711375  | ENSG00000137312 | FLOT1   | flotillin 1 [Source: | 5UTR    | 0.000 | YES | 4.96  | 9.29  | up | dowr | -    | no |
| chr17 | 47754251  | 47755750  | ENSG00000121067 | SPOP    | speckle-type POZ     | exon    | 0.000 | YES | 6.03  | 9.50  | up | dowr | -    | no |
| chr2  | 3521751   | 3524000   | ENSG00000182551 | ADI1    | acireductone dio     | 5UTR    | 0.000 | YES | 15.31 | 42.11 | up | dowr | -    | no |
| chr1  | 52862501  | 52863875  | ENSG00000085840 | ORC1    | origin recognition   | exon    | 0.002 | YES | 0.28  | 3.10  | up | dowr | -    | no |
| chr19 | 6424251   | 6426125   | ENSG00000088247 | KHSRP   | KH-type splicing     | r 5UTR  | 0.000 | YES | 3.40  | 6.81  | up | dowr | -    | no |
| chr19 | 44258376  | 44259875  | ENSG00000105771 | SMG9    | smg-9 homolog, r     | exon    | 0.000 | YES | 3.69  | 9.08  | up | dowr | -    | no |
| chr2  | 190525376 | 190526875 | ENSG00000138381 | ASNSD1  | asparagine synth     | 5UTR    | 0.000 | YES | 4.82  | 4.13  | up | dowr | -    | no |
| chr19 | 50815126  | 50816375  | ENSG00000131398 | KCNC3   | potassium voltage    | 3UTR    | 0.011 | NO  | 1.56  | 2.48  | up | dowr | -    | no |
| chr13 | 30423751  | 30425000  | ENSG00000122042 | UBL3    | ubiquitin-like 3     | [S 5UTR | 0.017 | NO  | 3.33  | 4.34  | up | dowr | -    | no |
| chr19 | 36545126  | 36546375  | ENSG00000075702 | WDR62   | WD repeat domai      | 5UTR    | 0.024 | NO  | 1.77  | 4.13  | up | dowr | -    | no |
| chr22 | 46692126  | 46693375  | ENSG00000075218 | GTSE1   | G-2 and S-phase      | 5UTR    | 0.029 | NO  | 0.99  | 2.27  | up | dowr | -    | no |
| chr4  | 140374626 | 140375875 | ENSG00000172007 | RAB33B  | RAB33B, member       | 5UTR    | 0.002 | NO  | 2.13  | 3.72  | up | dowr | -    | no |
| chr5  | 172754751 | 172756375 | ENSG00000113739 | STC2    | stanniocalcin 2      | [S 5UTR | 0.000 | NO  | 5.39  | 6.40  | up | dowr | -    | no |
| chr13 | 29292376  | 29293750  | ENSG00000139508 | SLC46A3 | solute carrier fam   | exon    | 0.000 | NO  | 3.47  | 6.61  | up | dowr | -    | no |

|       |           |           |                 |          |                           |       |     |      |       |    |       |      |     |
|-------|-----------|-----------|-----------------|----------|---------------------------|-------|-----|------|-------|----|-------|------|-----|
| chr16 | 67752626  | 67754000  | ENSG00000141098 | GFOD2    | glucose-fructose (exon    | 0.001 | NO  | 3.05 | 4.34  | up | dowr- | no   |     |
| chr4  | 2243251   | 2244500   | ENSG00000214367 | HAUS3    | HAUS augmin-like exon     | 0.009 | NO  | 0.71 | 2.06  | up | dowr- | no   |     |
| chr20 | 9212001   | 9213625   | ENSG00000101333 | PLCB4    | phospholipase C, intron   | 0.002 | NO  | 0.99 | 2.89  | up | dowr- | no   |     |
| chr20 | 9212751   | 9214000   | ENSG00000101333 | PLCB4    | phospholipase C, intron   | 0.005 | NO  | 0.85 | 2.27  | up | dowr- | no   |     |
| chr20 | 9263626   | 9265125   | ENSG00000101333 | PLCB4    | phospholipase C, intron   | 0.016 | NO  | 1.28 | 2.68  | up | dowr- | no   |     |
| chr20 | 61558751  | 61560125  | ENSG00000101191 | DIDO1    | death inducer-obl intron  | 0.003 | NO  | 0.71 | 2.89  | up | dowr- | no   |     |
| chr18 | 46478376  | 46479750  | ENSG00000101665 | SMAD7    | SMAD family member upstre | 0.001 | NO  | 1.13 | 2.89  | up | dowr- | no   |     |
| chr9  | 128003001 | 128004500 | ENSG00000044574 | HSPA5    | heat shock 70kDa 5UTR     | 0.000 | YES | 3.76 | 7.64  | up | -     | up   | no  |
| chr16 | 87425001  | 87426500  | ENSG00000140941 | MAP1LC3L | microtubule-asso 5UTR     | 0.000 | YES | 4.96 | 8.05  | up | -     | up   | no  |
| chr2  | 74425001  | 74426500  | ENSG00000065911 | MTHFD2   | methylenetetrahy 5UTR     | 0.000 | YES | 2.48 | 4.75  | up | -     | up   | no  |
| chr9  | 74525376  | 74526750  | ENSG00000155621 | C9orf85  | chromosome 9 or 5UTR      | 0.003 | NO  | 1.21 | 3.92  | up | -     | up   | no  |
| chr10 | 6244251   | 6245625   | ENSG00000170525 | PFKFB3   | 6-phosphofructo- 5UTR     | 0.000 | YES | 2.62 | 5.16  | up | -     | down | yes |
| chr4  | 170947001 | 170948250 | ENSG00000198948 | MFAP3L   | microfibrillar-assc exon  | 0.006 | NO  | 0.85 | 2.48  | up | -     | down | yes |
| chr10 | 6205001   | 6206375   | ENSG00000170525 | PFKFB3   | 6-phosphofructo- intron   | 0.011 | NO  | 3.90 | 4.75  | up | -     | down | yes |
| chr5  | 79783126  | 79784375  | ENSG00000152380 | FAM151B  | family with seque 5UTR    | 0.000 | NO  | 1.28 | 4.34  | up | -     | down | no  |
| chrX  | 54834751  | 54836000  | ENSG00000102316 | MAGED2   | melanoma antigen 5UTR     | 0.042 | NO  | 0.92 | 1.45  | up | -     | down | no  |
| chr5  | 149379501 | 149380875 | ENSG00000113716 | HMGXB3   | HMG box domain 5UTR       | 0.000 | YES | 2.62 | 4.54  | up | -     | -    | yes |
| chr8  | 103667251 | 103668875 | ENSG00000155090 | KLF10    | Kruppel-like factor 5UTR  | 0.000 | YES | 5.25 | 9.91  | up | -     | -    | yes |
| chr3  | 185826251 | 185827500 | ENSG00000244405 | ETV5     | ets variant 5 [Sou 5UTR   | 0.011 | NO  | 2.41 | 4.54  | up | -     | -    | yes |
| chr5  | 172197501 | 172198875 | ENSG00000120129 | DUSP1    | dual specificity ph 5UTR  | 0.001 | NO  | 4.40 | 6.81  | up | -     | -    | yes |
| chr3  | 64216501  | 64218000  | ENSG00000163637 | PRICKLE2 | prickle homolog 2 intron  | 0.000 | YES | 9.50 | 12.59 | up | -     | -    | no  |
| chr3  | 123342751 | 123344000 | ENSG00000065534 | MYLK     | myosin light chain 5UTR   | 0.000 | YES | 1.63 | 3.30  | up | -     | -    | no  |
| chr3  | 157815251 | 157816750 | ENSG00000168779 | SHOX2    | short stature homeo 3UTR  | 0.000 | YES | 4.11 | 10.53 | up | -     | -    | no  |
| chr5  | 15513751  | 15515000  | ENSG00000183580 | FBXL7    | F-box and leucine intron  | 0.034 | YES | 0.64 | 2.68  | up | -     | -    | no  |
| chr5  | 133561126 | 133562750 | ENSG00000113558 | SKP1     | S-phase kinase-asso 5UTR  | 0.000 | YES | 6.66 | 10.94 | up | -     | -    | no  |
| chr5  | 159546001 | 159547250 | ENSG00000170234 | PWWP2A   | PWWP domain cc 5UTR       | 0.004 | YES | 2.13 | 5.16  | up | -     | -    | no  |
| chr6  | 27114126  | 27115500  | ENSG00000184825 | HIST1H2A | histone cluster 1, 5UTR   | 0.000 | YES | 3.33 | 4.13  | up | -     | -    | no  |
| chr6  | 158428751 | 158430250 | ENSG00000078269 | SYNJ2    | synaptojanin 2 [Sintron   | 0.000 | YES | 2.76 | 8.26  | up | -     | -    | no  |
| chr7  | 75543501  | 75545125  | ENSG00000127948 | POR      | P450 (cytochrome c 5UTR   | 0.000 | YES | 2.62 | 6.40  | up | -     | -    | no  |
| chr7  | 104653001 | 104654750 | ENSG00000005483 | MLL5     | myeloid/lymphoid 5UTR     | 0.000 | YES | 6.31 | 8.05  | up | -     | -    | no  |
| chr7  | 137686126 | 137687625 | ENSG00000182158 | CREB3L2  | cAMP responsive 5UTR      | 0.000 | YES | 3.40 | 4.13  | up | -     | -    | no  |

|       |           |           |                 |          |                     |        |       |     |       |       |    |   |   |    |
|-------|-----------|-----------|-----------------|----------|---------------------|--------|-------|-----|-------|-------|----|---|---|----|
| chr7  | 149570251 | 149571875 | ENSG00000171130 | ATP6V0E2 | ATPase, H+ transp   | 5UTR   | 0.000 | YES | 7.16  | 15.90 | up | - | - | no |
| chr9  | 101983501 | 101985000 | ENSG00000106803 | SEC61B   | Sec61 beta subun    | 5UTR   | 0.000 | YES | 1.91  | 5.16  | up | - | - | no |
| chr9  | 134377626 | 134379000 | ENSG00000130714 | POMT1    | protein-O-manno     | 5UTR   | 0.000 | YES | 2.13  | 4.54  | up | - | - | no |
| chr11 | 62572251  | 62573625  | ENSG00000162231 | NXF1     | nuclear RNA expo    | 5UTR   | 0.000 | YES | 4.25  | 5.16  | up | - | - | no |
| chr16 | 2390126   | 2391625   | ENSG00000167972 | ABCA3    | ATP-binding casse   | exon   | 0.000 | YES | 4.96  | 10.32 | up | - | - | no |
| chr16 | 72860376  | 72861625  | ENSG00000140836 | ZFHX3    | zinc finger homec   | intron | 0.013 | YES | 1.06  | 2.68  | up | - | - | no |
| chr16 | 89939251  | 89940625  | ENSG00000141002 | TCF25    | transcription facti | 5UTR   | 0.000 | YES | 4.11  | 7.64  | up | - | - | no |
| chr17 | 259126    | 260500    | ENSG00000187624 | C17orf97 | chromosome 17 c     | 5UTR   | 0.000 | YES | 1.13  | 5.99  | up | - | - | no |
| chr17 | 43225126  | 43226500  | ENSG00000186834 | HEXIM1   | hexamethylene b     | 5UTR   | 0.000 | YES | 5.95  | 6.81  | up | - | - | no |
| chr1  | 153894751 | 153896250 | ENSG00000143614 | GATAD2B  | GATA zinc finger c  | exon   | 0.000 | YES | 2.55  | 8.67  | up | - | - | no |
| chr1  | 196297626 | 196298875 | ENSG00000162687 | KCNT2    | potassium channε    | intron | 0.018 | YES | 0.35  | 2.27  | up | - | - | no |
| chr2  | 118771126 | 118772500 | ENSG00000125633 | CCDC93   | coiled-coil domai   | 5UTR   | 0.000 | YES | 2.13  | 5.57  | up | - | - | no |
| chr19 | 2475501   | 2476875   | ENSG00000099860 | GADD45B  | growth arrest anc   | 5UTR   | 0.000 | YES | 1.84  | 4.13  | up | - | - | no |
| chr2  | 174829501 | 174831000 | ENSG00000172845 | SP3      | Sp3 transcription   | 5UTR   | 0.000 | YES | 3.26  | 7.43  | up | - | - | no |
| chr19 | 42723626  | 42725125  | ENSG00000167625 | ZNF526   | zinc finger proteir | 5UTR   | 0.000 | YES | 2.62  | 5.57  | up | - | - | no |
| chr22 | 24666001  | 24667375  | ENSG00000100014 | SPECC1L  | sperm antigen wii   | 5UTR   | 0.000 | YES | 3.47  | 5.78  | up | - | - | no |
| chr21 | 46707251  | 46708625  | ENSG00000186866 | POFUT2   | protein O-fucosyl   | 5UTR   | 0.000 | YES | 4.32  | 5.99  | up | - | - | no |
| chr2  | 220042126 | 220043625 | ENSG00000144567 | FAM134A  | family with seque   | 5UTR   | 0.000 | YES | 1.98  | 5.16  | up | - | - | no |
| chr20 | 45837501  | 45838875  | ENSG00000101040 | ZMYND8   | zinc finger, MYND   | 3UTR   | 0.018 | NO  | 14.60 | 18.99 | up | - | - | no |
| chr1  | 1166876   | 1168125   | ENSG00000176022 | B3GALT6  | UDP-Gal:betaGal     | 5UTR   | 0.025 | NO  | 1.21  | 2.68  | up | - | - | no |
| chr1  | 16173376  | 16174875  | ENSG00000065526 | SPEN     | spen homolog, trε   | 5UTR   | 0.003 | NO  | 3.05  | 4.34  | up | - | - | no |
| chr1  | 222816876 | 222818125 | ENSG00000154305 | MIA3     | melanoma inhibit    | 5UTR   | 0.024 | NO  | 1.49  | 2.48  | up | - | - | no |
| chr1  | 43232126  | 43233500  | ENSG00000117385 | LEPRE1   | leucine proline-er  | 5UTR   | 0.014 | NO  | 1.77  | 3.51  | up | - | - | no |
| chr10 | 1094126   | 1095500   | ENSG00000047056 | WDR37    | WD repeat domai     | 5UTR   | 0.000 | NO  | 5.18  | 4.34  | up | - | - | no |
| chr11 | 66444751  | 66446000  | ENSG00000173914 | RBM4B    | RNA binding moti    | 5UTR   | 0.001 | NO  | 2.91  | 3.72  | up | - | - | no |
| chr11 | 73881376  | 73882750  | ENSG00000168014 | C2CD3    | C2 calcium-depen    | 5UTR   | 0.000 | NO  | 3.12  | 6.19  | up | - | - | no |
| chr12 | 121124376 | 121125625 | ENSG00000110917 | MLEC     | malectin [Source:   | 5UTR   | 0.047 | NO  | 1.77  | 2.89  | up | - | - | no |
| chr14 | 103523626 | 103524875 | ENSG00000198752 | CDC42BPE | CDC42 binding pr    | 5UTR   | 0.011 | NO  | 2.13  | 2.68  | up | - | - | no |
| chr15 | 83477626  | 83478875  | ENSG00000156232 | WHAMM    | WAS protein hom     | 5UTR   | 0.004 | NO  | 1.28  | 3.51  | up | - | - | no |
| chr16 | 4421251   | 4422625   | ENSG00000168140 | VASN     | vasorin [Source:H   | 5UTR   | 0.013 | NO  | 2.34  | 4.13  | up | - | - | no |
| chr16 | 30668626  | 30669875  | ENSG00000156860 | FBRS     | fibrosin [Source:H  | 5UTR   | 0.020 | NO  | 3.47  | 4.34  | up | - | - | no |

|       |           |           |                 |          |                             |        |       |    |      |      |    |   |   |    |
|-------|-----------|-----------|-----------------|----------|-----------------------------|--------|-------|----|------|------|----|---|---|----|
| chr16 | 11835876  | 11837125  | ENSG00000153066 | TXNDC11  | thioredoxin doma            | 5UTR   | 0.041 | NO | 1.42 | 4.54 | up | - | - | no |
| chr19 | 7894001   | 7895375   | ENSG00000142459 | EVI5L    | ecotropic viral int         | 5UTR   | 0.006 | NO | 1.77 | 3.10 | up | - | - | no |
| chr19 | 18793876  | 18795125  | ENSG00000105662 | CRTC1    | CREB regulated tr           | 5UTR   | 0.038 | NO | 1.49 | 4.34 | up | - | - | no |
| chr19 | 19495876  | 19497125  | ENSG00000167491 | GATAD2A  | GATA zinc finger c          | 5UTR   | 0.019 | NO | 2.69 | 2.48 | up | - | - | no |
| chr19 | 44099626  | 44101125  | ENSG00000124444 | ZNF576   | zinc finger proteir         | 5UTR   | 0.000 | NO | 4.61 | 3.51 | up | - | - | no |
| chr19 | 47633376  | 47634750  | ENSG00000142230 | SAE1     | SUMO1 activating            | 5UTR   | 0.004 | NO | 2.41 | 3.30 | up | - | - | no |
| chr2  | 148777626 | 148778875 | ENSG00000204406 | MBD5     | methyl-CpG bindi            | 5UTR   | 0.019 | NO | 1.13 | 3.72 | up | - | - | no |
| chr2  | 55277126  | 55278375  | ENSG00000115310 | RTN4     | reticulon 4 [Sourc          | 5UTR   | 0.004 | NO | 2.76 | 3.51 | up | - | - | no |
| chr2  | 85554501  | 85555750  | ENSG00000152291 | TGOLN2   | trans-golgi netwo           | 5UTR   | 0.001 | NO | 1.70 | 2.48 | up | - | - | no |
| chr20 | 35088876  | 35090375  | ENSG00000080845 | DLGAP4   | discs, large (Dros          | 5UTR   | 0.004 | NO | 2.20 | 4.13 | up | - | - | no |
| chr22 | 40439626  | 40440875  | ENSG00000100354 | TNRC6B   | trinucleotide repe          | 5UTR   | 0.014 | NO | 2.69 | 2.68 | up | - | - | no |
| chr3  | 12598001  | 12599250  | ENSG00000075975 | MKRN2    | makorin ring fing           | 5UTR   | 0.000 | NO | 2.84 | 6.19 | up | - | - | no |
| chr3  | 194406001 | 194407250 | ENSG00000185112 | FAM43A   | family with seque           | 5UTR   | 0.007 | NO | 3.97 | 3.92 | up | - | - | no |
| chr3  | 48593876  | 48595125  | ENSG00000114268 | PFKFB4   | 6-phosphofructo-            | 5UTR   | 0.029 | NO | 2.27 | 2.68 | up | - | - | no |
| chr5  | 143549626 | 143550875 | ENSG00000183775 | KCTD16   | potassium chann             | 5UTR   | 0.030 | NO | 1.98 | 3.30 | up | - | - | no |
| chr6  | 27805626  | 27806875  | ENSG00000233822 | HIST1H2B | histone cluster 1,          | 5UTR   | 0.014 | NO | 1.63 | 3.30 | up | - | - | no |
| chr6  | 24720376  | 24721625  | ENSG00000112308 | C6orf62  | chromosome 6 or             | 5UTR   | 0.000 | NO | 2.20 | 3.51 | up | - | - | no |
| chr6  | 111136126 | 111137500 | ENSG00000155111 | CDK19    | cyclin-dependent            | 5UTR   | 0.004 | NO | 1.98 | 3.10 | up | - | - | no |
| chr7  | 92218876  | 92220125  | ENSG00000234545 | FAM133B  | family with seque           | 5UTR   | 0.005 | NO | 1.49 | 4.75 | up | - | - | no |
| chr8  | 145158626 | 145160000 | ENSG00000179632 | MAF1     | MAF1 homolog (S             | 5UTR   | 0.007 | NO | 3.19 | 4.95 | up | - | - | no |
| chr8  | 71520001  | 71521250  | ENSG00000067167 | TRAM1    | translocation assc          | 5UTR   | 0.015 | NO | 2.48 | 4.95 | up | - | - | no |
| chr9  | 95055376  | 95056750  | ENSG00000196305 | IARS     | isoleucyl-tRNA sy           | 5UTR   | 0.001 | NO | 3.05 | 3.72 | up | - | - | no |
| chr9  | 140099501 | 140100750 | ENSG00000187713 | TMEM203  | transmembrane p             | 5UTR   | 0.030 | NO | 1.42 | 2.48 | up | - | - | no |
| chr1  | 156234876 | 156236125 | ENSG00000198952 | SMG5     | smg-5 homolog, r            | exon   | 0.017 | NO | 0.57 | 2.48 | up | - | - | no |
| chr12 | 53876501  | 53877750  | ENSG00000139625 | MAP3K12  | mitogen-activate            | exon   | 0.021 | NO | 2.06 | 4.13 | up | - | - | no |
| chr20 | 34795626  | 34797000  | ENSG00000088367 | EPB41L1  | erythrocyte mem             | exon   | 0.023 | NO | 1.42 | 2.06 | up | - | - | no |
| chr3  | 12705001  | 12706250  | ENSG00000132155 | RAF1     | v-raf-1 murine le           | exon   | 0.016 | NO | 3.40 | 5.57 | up | - | - | no |
| chr3  | 62478251  | 62479500  | ENSG00000163618 | CADPS    | Ca <sup>++</sup> -dependent | exon   | 0.001 | NO | 4.18 | 6.40 | up | - | - | no |
| chr4  | 83769376  | 83770625  | ENSG00000138674 | SEC31A   | SEC31 homolog A             | exon   | 0.045 | NO | 0.35 | 1.45 | up | - | - | no |
| chr1  | 176511001 | 176512250 | ENSG00000116183 | PAPPA2   | pappalysin 2 [Sou           | intron | 0.040 | NO | 0.71 | 2.48 | up | - | - | no |
| chr1  | 204892001 | 204893250 | ENSG00000163531 | NFASC    | neurofascin [Sour           | intron | 0.022 | NO | 1.70 | 3.10 | up | - | - | no |

|       |           |           |                 |          |                            |       |    |       |       |    |   |   |    |
|-------|-----------|-----------|-----------------|----------|----------------------------|-------|----|-------|-------|----|---|---|----|
| chr1  | 153845001 | 153846250 | ENSG00000143614 | GATAD2B  | GATA zinc finger c intron  | 0.047 | NO | 0.64  | 1.86  | up | - | - | no |
| chr10 | 14186251  | 14187500  | ENSG00000151474 | FRMD4A   | FERM domain cor intron     | 0.030 | NO | 0.85  | 3.10  | up | - | - | no |
| chr19 | 11773126  | 11774500  | ENSG00000197332 | ZNF833P  | zinc finger proteir intron | 0.030 | NO | 0.64  | 2.48  | up | - | - | no |
| chr20 | 39902001  | 39903250  | ENSG00000174306 | ZHX3     | zinc fingers and h intron  | 0.040 | NO | 1.35  | 2.27  | up | - | - | no |
| chr20 | 39884876  | 39886125  | ENSG00000174306 | ZHX3     | zinc fingers and h intron  | 0.023 | NO | 2.13  | 2.89  | up | - | - | no |
| chr20 | 45962376  | 45963625  | ENSG00000101040 | ZMYND8   | zinc finger, MYND intron   | 0.047 | NO | 2.34  | 3.72  | up | - | - | no |
| chr20 | 45913126  | 45914625  | ENSG00000101040 | ZMYND8   | zinc finger, MYND intron   | 0.010 | NO | 11.63 | 11.56 | up | - | - | no |
| chr20 | 45841876  | 45843125  | ENSG00000101040 | ZMYND8   | zinc finger, MYND intron   | 0.010 | NO | 17.30 | 14.45 | up | - | - | no |
| chr3  | 62809001  | 62810250  | ENSG00000163618 | CADPS    | Ca+++dependent :intron     | 0.000 | NO | 3.19  | 6.19  | up | - | - | no |
| chr3  | 62815751  | 62817000  | ENSG00000163618 | CADPS    | Ca+++dependent :intron     | 0.000 | NO | 3.05  | 5.16  | up | - | - | no |
| chr3  | 62643751  | 62645250  | ENSG00000163618 | CADPS    | Ca+++dependent :intron     | 0.027 | NO | 4.68  | 7.84  | up | - | - | no |
| chr3  | 62538251  | 62539500  | ENSG00000163618 | CADPS    | Ca+++dependent :intron     | 0.030 | NO | 5.39  | 8.46  | up | - | - | no |
| chr3  | 62511001  | 62512500  | ENSG00000163618 | CADPS    | Ca+++dependent :intron     | 0.001 | NO | 5.60  | 8.67  | up | - | - | no |
| chr3  | 62602501  | 62604000  | ENSG00000163618 | CADPS    | Ca+++dependent :intron     | 0.036 | NO | 5.74  | 7.43  | up | - | - | no |
| chr3  | 62617251  | 62618500  | ENSG00000163618 | CADPS    | Ca+++dependent :intron     | 0.048 | NO | 5.60  | 5.37  | up | - | - | no |
| chr3  | 64156501  | 64157750  | ENSG00000163637 | PRICKLE2 | prickle homolog 2 intron   | 0.022 | NO | 5.60  | 9.91  | up | - | - | no |
| chr3  | 64415501  | 64416750  | ENSG00000163637 | PRICKLE2 | prickle homolog 2 intron   | 0.002 | NO | 5.18  | 9.08  | up | - | - | no |
| chr3  | 64310251  | 64311500  | ENSG00000163637 | PRICKLE2 | prickle homolog 2 intron   | 0.026 | NO | 5.10  | 8.46  | up | - | - | no |
| chr3  | 64157251  | 64158500  | ENSG00000163637 | PRICKLE2 | prickle homolog 2 intron   | 0.003 | NO | 5.60  | 8.67  | up | - | - | no |
| chr3  | 64395251  | 64396750  | ENSG00000163637 | PRICKLE2 | prickle homolog 2 intron   | 0.003 | NO | 5.60  | 8.67  | up | - | - | no |
| chr3  | 64238001  | 64239250  | ENSG00000163637 | PRICKLE2 | prickle homolog 2 intron   | 0.040 | NO | 7.51  | 11.56 | up | - | - | no |
| chr3  | 64411251  | 64412750  | ENSG00000163637 | PRICKLE2 | prickle homolog 2 intron   | 0.001 | NO | 6.24  | 8.67  | up | - | - | no |
| chr3  | 64238501  | 64240000  | ENSG00000163637 | PRICKLE2 | prickle homolog 2 intron   | 0.000 | NO | 10.28 | 14.04 | up | - | - | no |
| chr3  | 64165001  | 64166250  | ENSG00000163637 | PRICKLE2 | prickle homolog 2 intron   | 0.001 | NO | 4.40  | 5.99  | up | - | - | no |
| chr3  | 64309501  | 64311000  | ENSG00000163637 | PRICKLE2 | prickle homolog 2 intron   | 0.017 | NO | 7.30  | 9.91  | up | - | - | no |
| chr3  | 64205251  | 64206500  | ENSG00000163637 | PRICKLE2 | prickle homolog 2 intron   | 0.000 | NO | 8.86  | 11.97 | up | - | - | no |
| chr3  | 64180251  | 64181500  | ENSG00000163637 | PRICKLE2 | prickle homolog 2 intron   | 0.041 | NO | 6.59  | 8.88  | up | - | - | no |
| chr3  | 64281501  | 64282750  | ENSG00000163637 | PRICKLE2 | prickle homolog 2 intron   | 0.000 | NO | 6.81  | 9.08  | up | - | - | no |
| chr3  | 64258501  | 64259750  | ENSG00000163637 | PRICKLE2 | prickle homolog 2 intron   | 0.040 | NO | 7.94  | 10.32 | up | - | - | no |
| chr3  | 64407501  | 64408750  | ENSG00000163637 | PRICKLE2 | prickle homolog 2 intron   | 0.000 | NO | 6.52  | 8.46  | up | - | - | no |
| chr3  | 64263251  | 64264500  | ENSG00000163637 | PRICKLE2 | prickle homolog 2 intron   | 0.001 | NO | 7.16  | 9.29  | up | - | - | no |

|       |           |           |                 |           |                             |       |     |       |       |    |    |    |     |
|-------|-----------|-----------|-----------------|-----------|-----------------------------|-------|-----|-------|-------|----|----|----|-----|
| chr3  | 64126001  | 64127750  | ENSG00000163637 | PRICKLE2  | prickle homolog 2 intron    | 0.000 | NO  | 12.19 | 15.69 | up | -  | -  | no  |
| chr3  | 64204751  | 64206000  | ENSG00000163637 | PRICKLE2  | prickle homolog 2 intron    | 0.005 | NO  | 10.00 | 12.39 | up | -  | -  | no  |
| chr3  | 64166251  | 64167500  | ENSG00000163637 | PRICKLE2  | prickle homolog 2 intron    | 0.001 | NO  | 7.51  | 9.29  | up | -  | -  | no  |
| chr3  | 64341001  | 64342250  | ENSG00000163637 | PRICKLE2  | prickle homolog 2 intron    | 0.026 | NO  | 8.29  | 10.12 | up | -  | -  | no  |
| chr3  | 64250501  | 64252000  | ENSG00000163637 | PRICKLE2  | prickle homolog 2 intron    | 0.000 | NO  | 9.50  | 11.56 | up | -  | -  | no  |
| chr3  | 64182001  | 64183250  | ENSG00000163637 | PRICKLE2  | prickle homolog 2 intron    | 0.017 | NO  | 5.39  | 6.40  | up | -  | -  | no  |
| chr3  | 64292501  | 64294000  | ENSG00000163637 | PRICKLE2  | prickle homolog 2 intron    | 0.006 | NO  | 7.51  | 8.88  | up | -  | -  | no  |
| chr3  | 64321751  | 64323000  | ENSG00000163637 | PRICKLE2  | prickle homolog 2 intron    | 0.000 | NO  | 5.67  | 6.61  | up | -  | -  | no  |
| chr3  | 64151501  | 64153000  | ENSG00000163637 | PRICKLE2  | prickle homolog 2 intron    | 0.000 | NO  | 9.57  | 11.15 | up | -  | -  | no  |
| chr3  | 64259001  | 64260250  | ENSG00000163637 | PRICKLE2  | prickle homolog 2 intron    | 0.034 | NO  | 6.59  | 7.64  | up | -  | -  | no  |
| chr3  | 64269751  | 64271250  | ENSG00000163637 | PRICKLE2  | prickle homolog 2 intron    | 0.000 | NO  | 6.24  | 7.02  | up | -  | -  | no  |
| chr3  | 64258001  | 64259250  | ENSG00000163637 | PRICKLE2  | prickle homolog 2 intron    | 0.009 | NO  | 9.15  | 9.70  | up | -  | -  | no  |
| chr3  | 64296501  | 64298000  | ENSG00000163637 | PRICKLE2  | prickle homolog 2 intron    | 0.001 | NO  | 7.23  | 7.64  | up | -  | -  | no  |
| chr3  | 64208251  | 64209500  | ENSG00000163637 | PRICKLE2  | prickle homolog 2 intron    | 0.030 | NO  | 10.56 | 11.15 | up | -  | -  | no  |
| chr3  | 64214251  | 64215500  | ENSG00000163637 | PRICKLE2  | prickle homolog 2 intron    | 0.023 | NO  | 9.29  | 9.70  | up | -  | -  | no  |
| chr3  | 64215001  | 64216250  | ENSG00000163637 | PRICKLE2  | prickle homolog 2 intron    | 0.000 | NO  | 9.29  | 9.70  | up | -  | -  | no  |
| chr3  | 64208751  | 64210000  | ENSG00000163637 | PRICKLE2  | prickle homolog 2 intron    | 0.004 | NO  | 10.92 | 11.15 | up | -  | -  | no  |
| chr3  | 64342001  | 64343250  | ENSG00000163637 | PRICKLE2  | prickle homolog 2 intron    | 0.001 | NO  | 10.00 | 9.08  | up | -  | -  | no  |
| chr3  | 64359501  | 64360750  | ENSG00000163637 | PRICKLE2  | prickle homolog 2 intron    | 0.024 | NO  | 7.09  | 6.40  | up | -  | -  | no  |
| chr3  | 64299501  | 64300750  | ENSG00000163637 | PRICKLE2  | prickle homolog 2 intron    | 0.003 | NO  | 7.30  | 6.19  | up | -  | -  | no  |
| chr4  | 169789626 | 169790875 | ENSG00000129116 | PALLD     | palladin, cytoskel intron   | 0.026 | NO  | 1.13  | 2.89  | up | -  | -  | no  |
| chr1  | 110567001 | 110568250 | ENSG00000143093 | STRIP1    | striatin interactin, upstre | 0.013 | NO  | 0.28  | 2.27  | up | -  | -  | no  |
| chr15 | 65587876  | 65589250  | ENSG00000199568 | RNU5A-1   | RNA, U5A small n exon       | 0.007 | YES | 4.68  | 3.10  | na | na | na | yes |
| chr3  | 52569751  | 52571250  | ENSG00000168273 | SMIM4     | small integral mei5UTR      | 0.008 | YES | 1.84  | 4.75  | na | na | na | no  |
| chr3  | 62958751  | 62960000  | ENSG00000244342 | LINC00698 | long intergenic nc intron   | 0.000 | YES | 3.05  | 6.61  | na | na | na | no  |
| chr3  | 63417001  | 63418250  | ENSG00000241359 | SYNPR-AS  | SYNPR antisense lintron     | 0.049 | YES | 2.91  | 6.81  | na | na | na | no  |
| chr1  | 11967626  | 11969125  | ENSG00000199347 | RNU5E-1   | RNA, U5E small n exon       | 0.000 | YES | 6.73  | 5.37  | na | na | na | no  |
| chr3  | 64717751  | 64719000  | ENSG00000241684 | ADAMTS9   | ADAMTS9 antiser intron      | 0.000 | YES | 5.46  | 8.88  | na | na | na | no  |
| chr3  | 64718251  | 64719500  | ENSG00000241684 | ADAMTS9   | ADAMTS9 antiser intron      | 0.002 | YES | 7.59  | 10.73 | na | na | na | no  |
| chr3  | 162919626 | 162920875 | ENSG00000241369 | CT64      | cancer/testis anti, exon    | 0.020 | YES | 1.56  | 2.89  | na | na | na | no  |
| chr6  | 125293251 | 125294500 | ENSG00000146373 | RNF217    | ring finger proteir intron  | 0.048 | YES | 0.50  | 2.27  | na | na | na | no  |



|       |           |           |                 |              |                                    |               |       |       |       |       |    |    |    |    |
|-------|-----------|-----------|-----------------|--------------|------------------------------------|---------------|-------|-------|-------|-------|----|----|----|----|
| chr7  | 148376    | 150250    | ENSG00000240859 | AC093627.10  | exon                               | 0.000         | YES   | 18.72 | 36.13 | na    | na | na | no |    |
| chr7  | 6542626   | 6544125   | ENSG00000215045 | GRID2IP      | glutamate receptor                 | exon          | 0.000 | YES   | 6.81  | 6.81  | na | na | na | no |
| chr7  | 44621126  | 44622750  | ENSG00000158604 | TMED4        | transmembrane protein              | 5UTR          | 0.000 | YES   | 4.47  | 8.26  | na | na | na | no |
| chr7  | 108209501 | 108211000 | ENSG00000177683 | THAP5        | THAP domain containing             | 5UTR          | 0.000 | YES   | 2.76  | 6.81  | na | na | na | no |
| chr8  | 117180126 | 117181375 | ENSG00000249917 | LINC00536    | long intergenic non-coding         | intron        | 0.017 | YES   | 0.85  | 2.89  | na | na | na | no |
| chr8  | 117886376 | 117887875 | ENSG00000253327 | RAD21-AS     | RAD21 antisense                    | 5UTR          | 0.000 | YES   | 5.32  | 11.15 | na | na | na | no |
| chr9  | 139010126 | 139011500 | ENSG00000238227 | C9orf69      | chromosome 9 open reading          | exon          | 0.000 | YES   | 3.69  | 10.32 | na | na | na | no |
| chr11 | 65189501  | 65191125  | ENSG00000245532 | NEAT1        | nuclear paraspeckle                | exon          | 0.000 | YES   | 7.23  | 11.15 | na | na | na | no |
| chr11 | 65190251  | 65191750  | ENSG00000245532 | NEAT1        | nuclear paraspeckle                | exon          | 0.000 | YES   | 6.81  | 11.35 | na | na | na | no |
| chr11 | 74203501  | 74205125  | ENSG00000077514 | POLD3        | polymerase (DNA replication)       | 5UTR          | 0.000 | YES   | 2.48  | 15.48 | na | na | na | no |
| chr12 | 12939251  | 12940750  | ENSG00000178878 | APOLD1       | apolipoprotein L class 1           | 3UTR          | 0.000 | YES   | 3.47  | 7.02  | na | na | na | no |
| chr12 | 13079876  | 13081250  | ENSG00000247498 | RP11-392P7.6 |                                    | exon          | 0.000 | YES   | 1.63  | 4.34  | na | na | na | no |
| chr16 | 2264251   | 2265750   | ENSG00000184207 | PGP          | phosphoglycolate phosphatase       | 5UTR          | 0.000 | YES   | 8.15  | 7.64  | na | na | na | no |
| chr16 | 10976126  | 10977500  | ENSG00000179583 | CIITA        | class II, major histocompatibility | intron        | 0.001 | YES   | 1.98  | 4.75  | na | na | na | no |
| chr17 | 48943001  | 48944500  | ENSG00000229980 | TOB1-AS1     | TOB1 antisense                     | R exon        | 0.000 | YES   | 5.32  | 8.88  | na | na | na | no |
| chr1  | 25347376  | 25348875  | ENSG00000264371 | MIR4425      | microRNA 4425                      | [5' upstream] | 0.000 | YES   | 1.63  | 4.95  | na | na | na | no |
| chr1  | 109642126 | 109643625 | ENSG00000238881 | SCARNA2      | small Cajal body-specific RNA      | 5' exon       | 0.000 | YES   | 1.77  | 4.34  | na | na | na | no |
| chr17 | 62222751  | 62224000  | ENSG00000266402 | RP11-329L6.1 |                                    | exon          | 0.009 | YES   | 5.03  | 6.19  | na | na | na | no |
| chr17 | 73401126  | 73402500  | ENSG00000264511 | MIR3678      | microRNA 3678                      | [5' exon]     | 0.005 | YES   | 4.18  | 7.02  | na | na | na | no |
| chr17 | 79790501  | 79791875  | ENSG00000182676 | PPP1R27      | protein phosphatase 1 regulatory   | 3UTR          | 0.017 | YES   | 2.06  | 3.30  | na | na | na | no |
| chr18 | 74336876  | 74338125  | ENSG00000266256 | LINC00681    | long intergenic non-coding         | exon          | 0.000 | YES   | 1.28  | 2.89  | na | na | na | no |
| chr1  | 28974501  | 28976000  | ENSG00000209804 | RNU11        | RNA, U11 small nuclear             | exon          | 0.000 | YES   | 10.42 | 7.02  | na | na | na | no |
| chr1  | 150487501 | 150488875 | ENSG00000228126 | LINC00561    | long intergenic non-coding         | exon          | 0.000 | YES   | 2.34  | 5.78  | na | na | na | no |
| chr1  | 155532376 | 155533625 | ENSG00000235919 | ASH1L-AS     | ASH1L antisense                    | 5' exon       | 0.004 | YES   | 1.91  | 4.34  | na | na | na | no |
| chr1  | 190725876 | 190727250 | ENSG00000231175 | RP11-463J7.2 |                                    | intron        | 0.005 | YES   | 0.92  | 2.06  | na | na | na | no |
| chr20 | 48729001  | 48730500  | ENSG00000244687 | UBE2V1       | ubiquitin-conjugating enzyme E2    | 5UTR          | 0.000 | YES   | 3.83  | 7.43  | na | na | na | no |
| chr1  | 228269626 | 228271000 | ENSG00000143761 | ARF1         | ADP-ribosylation factor 1          | 5UTR          | 0.002 | YES   | 1.28  | 2.06  | na | na | na | no |
| chr1  | 228353001 | 228354375 | ENSG00000181873 | IBA57        | IBA57, iron-sulfur domain          | 5UTR          | 0.000 | YES   | 1.56  | 4.95  | na | na | na | no |
| chr1  | 228645126 | 228646375 | ENSG00000196890 | HIST3H2B     | histone cluster 3, H2B             | 5UTR          | 0.000 | YES   | 2.34  | 2.48  | na | na | na | no |
| chr1  | 48419751  | 48421000  | ENSG00000204018 | TRABD2B      | TraB domain containing             | intron        | 0.006 | YES   | 0.78  | 1.86  | na | na | na | no |
| chr2  | 74733876  | 74735375  | ENSG00000115289 | PCGF1        | polycomb group protein             | 5UTR          | 0.000 | YES   | 3.62  | 5.57  | na | na | na | no |

|       |           |           |                 |              |                          |       |     |      |       |    |    |    |    |
|-------|-----------|-----------|-----------------|--------------|--------------------------|-------|-----|------|-------|----|----|----|----|
| chr2  | 135675501 | 135677000 | ENSG00000082258 | CCNT2        | cyclin T2 [Source: 5UTR  | 0.000 | YES | 4.47 | 9.50  | na | na | na | no |
| chr19 | 34849501  | 34851000  | ENSG00000105220 | GPI          | glucose-6-phosph5UTR     | 0.000 | YES | 3.12 | 5.78  | na | na | na | no |
| chr19 | 44123001  | 44124375  | ENSG00000131116 | ZNF428       | zinc finger proteir exon | 0.000 | YES | 1.70 | 3.92  | na | na | na | no |
| chr19 | 48866501  | 48868125  | ENSG00000161558 | TMEM143      | transmembrane ꝑ5UTR      | 0.000 | YES | 5.46 | 13.21 | na | na | na | no |
| chr19 | 51160876  | 51162375  | ENSG00000235034 | C19orf81     | chromosome 19 c exon     | 0.000 | YES | 4.18 | 10.73 | na | na | na | no |
| chr19 | 51161626  | 51163125  | ENSG00000235034 | C19orf81     | chromosome 19 c 3UTR     | 0.000 | YES | 4.25 | 9.91  | na | na | na | no |
| chr12 | 54411126  | 54412375  | ENSG00000198353 | HOXC4        | homeobox C4 [So 5UTR     | 0.005 | NO  | 1.06 | 2.89  | na | na | na | no |
| chr4  | 667376    | 668875    | ENSG00000215375 | MYL5         | myosin, light chai 5UTR  | 0.000 | NO  | 2.69 | 7.23  | na | na | na | no |
| chr11 | 61276251  | 61277625  | ENSG00000204950 | LRRC10B      | leucine rich repea5UTR   | 0.000 | NO  | 1.91 | 4.34  | na | na | na | no |
| chr14 | 105956876 | 105958250 | ENSG00000185347 | C14orf80     | chromosome 14 c 5UTR     | 0.031 | NO  | 4.18 | 7.84  | na | na | na | no |
| chr8  | 103875751 | 103877250 | ENSG00000253320 | KB-1507C     | HCG15011, isofo 5UTR     | 0.000 | NO  | 4.82 | 8.26  | na | na | na | no |
| chr6  | 26198876  | 26200375  | ENSG00000197846 | HIST1H2B     | histone cluster 1, 5UTR  | 0.010 | NO  | 2.27 | 3.72  | na | na | na | no |
| chr5  | 134181001 | 134182250 | ENSG00000181904 | C5orf24      | chromosome 5 oꝑ5UTR      | 0.000 | NO  | 2.55 | 3.92  | na | na | na | no |
| chr19 | 46498001  | 46499375  | ENSG00000104983 | CCDC61       | coiled-coil domair 5UTR  | 0.017 | NO  | 3.05 | 3.51  | na | na | na | no |
| chr11 | 65213001  | 65215000  | ENSG00000245532 | NEAT1        | nuclear paraspecl exon   | 0.000 | NO  | 4.68 | 12.80 | na | na | na | no |
| chr15 | 69754626  | 69756000  | ENSG00000245750 | RP11-279F6.1 | exon                     | 0.019 | NO  | 1.06 | 2.27  | na | na | na | no |
| chr3  | 64795501  | 64796750  | ENSG00000241684 | ADAMTS9      | ADAMTS9 antiser exon     | 0.002 | NO  | 5.53 | 11.15 | na | na | na | no |
| chr11 | 65212251  | 65213750  | ENSG00000245532 | NEAT1        | nuclear paraspecl exon   | 0.000 | NO  | 5.25 | 10.12 | na | na | na | no |
| chr3  | 64794751  | 64796250  | ENSG00000241684 | ADAMTS9      | ADAMTS9 antiser exon     | 0.000 | NO  | 7.30 | 14.04 | na | na | na | no |
| chr1  | 152338001 | 152339375 | ENSG00000237975 | FLG-AS1      | FLG antisense RN. exon   | 0.021 | NO  | 2.06 | 3.72  | na | na | na | no |
| chr20 | 22380251  | 22381750  | ENSG00000204684 | RP5-1004I9.1 | exon                     | 0.008 | NO  | 1.28 | 2.27  | na | na | na | no |
| chr11 | 65210376  | 65211875  | ENSG00000245532 | NEAT1        | nuclear paraspecl exon   | 0.000 | NO  | 4.75 | 8.26  | na | na | na | no |
| chr11 | 65210001  | 65211250  | ENSG00000245532 | NEAT1        | nuclear paraspecl exon   | 0.016 | NO  | 4.04 | 7.02  | na | na | na | no |
| chr19 | 12605626  | 12606875  | ENSG00000242852 | ZNF709       | zinc finger proteir exon | 0.000 | NO  | 1.56 | 2.48  | na | na | na | no |
| chr3  | 64728251  | 64729500  | ENSG00000241684 | ADAMTS9      | ADAMTS9 antiser exon     | 0.011 | NO  | 4.68 | 7.43  | na | na | na | no |
| chr3  | 169482001 | 169483250 | ENSG00000200182 | TERC         | telomerase RNA c exon    | 0.033 | NO  | 2.27 | 3.51  | na | na | na | no |
| chr3  | 14989501  | 14990750  | ENSG00000225733 | FGD5-AS1     | FGD5 antisense R exon    | 0.017 | NO  | 2.91 | 4.34  | na | na | na | no |
| chr1  | 108536001 | 108537250 | ENSG00000230489 | VAV3-AS1     | VAV3 antisense R exon    | 0.025 | NO  | 1.70 | 2.48  | na | na | na | no |
| chr9  | 139622001 | 139623250 | ENSG00000233016 | SNHG7        | small nucleolar RI exon  | 0.046 | NO  | 1.91 | 2.68  | na | na | na | no |
| chr3  | 64726001  | 64727500  | ENSG00000241684 | ADAMTS9      | ADAMTS9 antiser exon     | 0.000 | NO  | 9.36 | 12.80 | na | na | na | no |
| chr11 | 65203626  | 65204875  | ENSG00000245532 | NEAT1        | nuclear paraspecl exon   | 0.008 | NO  | 3.12 | 4.13  | na | na | na | no |

|       |           |           |                 |                |                            |        |       |    |       |       |    |    |    |    |
|-------|-----------|-----------|-----------------|----------------|----------------------------|--------|-------|----|-------|-------|----|----|----|----|
| chr3  | 64729001  | 64731000  | ENSG00000241684 | ADAMTS9        | ADAMTS9 antisense          | exon   | 0.005 | NO | 12.12 | 15.90 | na | na | na | no |
| chr11 | 65202501  | 65203875  | ENSG00000245532 | NEAT1          | nuclear paraspeckle        | exon   | 0.006 | NO | 4.61  | 5.37  | na | na | na | no |
| chr4  | 775001    | 776375    | ENSG00000249592 | RP11-440L14.1  |                            | exon   | 0.000 | NO | 2.69  | 3.10  | na | na | na | no |
| chr3  | 63990751  | 63992750  | ENSG00000239653 | PSMD6-AS1      | PSMD6 antisense            | exon   | 0.000 | NO | 19.00 | 21.06 | na | na | na | no |
| chr3  | 64787001  | 64788250  | ENSG00000241684 | ADAMTS9        | ADAMTS9 antisense          | exon   | 0.029 | NO | 10.00 | 10.53 | na | na | na | no |
| chr3  | 64787501  | 64789250  | ENSG00000241684 | ADAMTS9        | ADAMTS9 antisense          | exon   | 0.001 | NO | 13.61 | 14.04 | na | na | na | no |
| chr16 | 3173501   | 3174875   | ENSG00000263072 | RP11-473M20.14 |                            | exon   | 0.000 | NO | 4.89  | 4.54  | na | na | na | no |
| chr11 | 65197626  | 65198875  | ENSG00000245532 | NEAT1          | nuclear paraspeckle        | exon   | 0.033 | NO | 5.95  | 3.92  | na | na | na | no |
| chr11 | 65197001  | 65198250  | ENSG00000245532 | NEAT1          | nuclear paraspeckle        | exon   | 0.011 | NO | 7.66  | 4.75  | na | na | na | no |
| chr15 | 65596501  | 65597750  | ENSG00000200156 | RNU5B-1        | RNA, U5B small nuclear     | exon   | 0.046 | NO | 7.37  | 2.89  | na | na | na | no |
| chr1  | 45186876  | 45188125  | ENSG00000199377 | RNU5F-1        | RNA, U5F small nuclear     | exon   | 0.019 | NO | 7.09  | 2.27  | na | na | na | no |
| chr11 | 77760501  | 77761875  | ENSG00000259112 | NDUFC2-K       | NDUFC2-KCTD14              | intron | 0.003 | NO | 0.28  | 3.10  | na | na | na | no |
| chr3  | 137491126 | 137492375 | ENSG00000239513 | RP11-2A4.3     |                            | intron | 0.033 | NO | 0.64  | 2.48  | na | na | na | no |
| chr19 | 29908501  | 29909750  | ENSG00000264515 | CTC-525D6.1    |                            | intron | 0.019 | NO | 0.50  | 1.86  | na | na | na | no |
| chr1  | 59262251  | 59263500  | ENSG00000234807 | RP4-794H19.2   |                            | intron | 0.044 | NO | 0.57  | 2.06  | na | na | na | no |
| chr3  | 181119126 | 181120375 | ENSG00000242808 | SOX2-OT        | SOX2 overlapping           | intron | 0.034 | NO | 0.71  | 2.48  | na | na | na | no |
| chr1  | 15034251  | 15035500  | ENSG00000189337 | KAZN           | kazrin, periplakin         | intron | 0.016 | NO | 0.64  | 2.06  | na | na | na | no |
| chr3  | 177182501 | 177183750 | ENSG00000228221 | LINC00571      | long intergenic non-coding | intron | 0.015 | NO | 1.06  | 3.30  | na | na | na | no |
| chr8  | 94348626  | 94349875  | ENSG00000246662 | LINC00531      | long intergenic non-coding | intron | 0.003 | NO | 0.92  | 2.68  | na | na | na | no |
| chr20 | 57133876  | 57135125  | ENSG00000231290 | APCDD1L        | APCDD1L antisense          | intron | 0.023 | NO | 2.34  | 6.81  | na | na | na | no |
| chr3  | 168042876 | 168044125 | ENSG00000206120 | EGFEM1P        | EGF-like and EMI           | intron | 0.034 | NO | 1.21  | 3.51  | na | na | na | no |
| chr20 | 57118001  | 57119375  | ENSG00000231290 | APCDD1L        | APCDD1L antisense          | intron | 0.020 | NO | 1.91  | 5.37  | na | na | na | no |
| chr20 | 58826126  | 58827500  | ENSG00000228340 | RP5-1043L13.1  |                            | intron | 0.020 | NO | 1.42  | 3.51  | na | na | na | no |
| chr20 | 58741376  | 58742875  | ENSG00000228340 | RP5-1043L13.1  |                            | intron | 0.005 | NO | 1.56  | 3.72  | na | na | na | no |
| chr19 | 56998126  | 56999375  | ENSG00000166770 | AC004696.2     |                            | intron | 0.041 | NO | 0.99  | 1.86  | na | na | na | no |
| chr3  | 64692001  | 64693250  | ENSG00000241684 | ADAMTS9        | ADAMTS9 antisense          | intron | 0.008 | NO | 4.68  | 8.67  | na | na | na | no |
| chr3  | 181485251 | 181486500 | ENSG00000242808 | SOX2-OT        | SOX2 overlapping           | intron | 0.031 | NO | 1.49  | 2.68  | na | na | na | no |
| chr3  | 63526501  | 63528000  | ENSG00000241359 | SYNPR-AS       | SYNPR antisense            | intron | 0.019 | NO | 3.26  | 5.78  | na | na | na | no |
| chr3  | 64914501  | 64915750  | ENSG00000241684 | ADAMTS9        | ADAMTS9 antisense          | intron | 0.006 | NO | 6.10  | 9.70  | na | na | na | no |
| chr3  | 64704751  | 64706500  | ENSG00000241684 | ADAMTS9        | ADAMTS9 antisense          | intron | 0.001 | NO | 9.15  | 14.45 | na | na | na | no |
| chr3  | 64873001  | 64874250  | ENSG00000241684 | ADAMTS9        | ADAMTS9 antisense          | intron | 0.022 | NO | 5.39  | 8.46  | na | na | na | no |

|      |          |          |                 |          |                           |                |       |    |       |       |    |    |    |    |
|------|----------|----------|-----------------|----------|---------------------------|----------------|-------|----|-------|-------|----|----|----|----|
| chr3 | 64775251 | 64776500 | ENSG00000241684 | ADAMTS9  | ADAMTS9                   | antiser intron | 0.037 | NO | 7.02  | 10.53 | na | na | na | no |
| chr3 | 64924751 | 64926000 | ENSG00000241684 | ADAMTS9  | ADAMTS9                   | antiser intron | 0.006 | NO | 7.37  | 10.94 | na | na | na | no |
| chr3 | 64689001 | 64690250 | ENSG00000241684 | ADAMTS9  | ADAMTS9                   | antiser intron | 0.001 | NO | 5.46  | 7.64  | na | na | na | no |
| chr3 | 64684001 | 64685250 | ENSG00000241684 | ADAMTS9  | ADAMTS9                   | antiser intron | 0.015 | NO | 4.75  | 6.61  | na | na | na | no |
| chr3 | 64873501 | 64875000 | ENSG00000241684 | ADAMTS9  | ADAMTS9                   | antiser intron | 0.010 | NO | 7.23  | 9.91  | na | na | na | no |
| chr3 | 64692501 | 64694250 | ENSG00000241684 | ADAMTS9  | ADAMTS9                   | antiser intron | 0.005 | NO | 10.56 | 14.45 | na | na | na | no |
| chr3 | 64774501 | 64776000 | ENSG00000241684 | ADAMTS9  | ADAMTS9                   | antiser intron | 0.001 | NO | 7.87  | 10.73 | na | na | na | no |
| chr3 | 64809001 | 64810250 | ENSG00000241684 | ADAMTS9  | ADAMTS9                   | antiser intron | 0.002 | NO | 7.73  | 10.32 | na | na | na | no |
| chr3 | 64899251 | 64901500 | ENSG00000241684 | ADAMTS9  | ADAMTS9                   | antiser intron | 0.001 | NO | 15.60 | 20.64 | na | na | na | no |
| chr3 | 64740001 | 64741250 | ENSG00000241684 | ADAMTS9  | ADAMTS9                   | antiser intron | 0.000 | NO | 8.51  | 11.15 | na | na | na | no |
| chr3 | 64731001 | 64732500 | ENSG00000241684 | ADAMTS9  | ADAMTS9                   | antiser intron | 0.001 | NO | 8.15  | 10.53 | na | na | na | no |
| chr3 | 64677001 | 64678500 | ENSG00000241684 | ADAMTS9  | ADAMTS9                   | antiser intron | 0.000 | NO | 10.42 | 13.42 | na | na | na | no |
| chr3 | 64821751 | 64823000 | ENSG00000241684 | ADAMTS9  | ADAMTS9                   | antiser intron | 0.000 | NO | 6.45  | 8.26  | na | na | na | no |
| chr3 | 64920751 | 64922000 | ENSG00000241684 | ADAMTS9  | ADAMTS9                   | antiser intron | 0.002 | NO | 8.44  | 10.73 | na | na | na | no |
| chr3 | 64722251 | 64723500 | ENSG00000241684 | ADAMTS9  | ADAMTS9                   | antiser intron | 0.000 | NO | 8.01  | 10.12 | na | na | na | no |
| chr3 | 64825001 | 64827000 | ENSG00000241684 | ADAMTS9  | ADAMTS9                   | antiser intron | 0.001 | NO | 13.26 | 16.51 | na | na | na | no |
| chr3 | 64913001 | 64914250 | ENSG00000241684 | ADAMTS9  | ADAMTS9                   | antiser intron | 0.005 | NO | 8.29  | 10.32 | na | na | na | no |
| chr3 | 64862751 | 64864500 | ENSG00000241684 | ADAMTS9  | ADAMTS9                   | antiser intron | 0.005 | NO | 11.48 | 14.24 | na | na | na | no |
| chr3 | 64740501 | 64741750 | ENSG00000241684 | ADAMTS9  | ADAMTS9                   | antiser intron | 0.000 | NO | 9.00  | 11.15 | na | na | na | no |
| chr3 | 64839751 | 64841000 | ENSG00000241684 | ADAMTS9  | ADAMTS9                   | antiser intron | 0.000 | NO | 7.51  | 9.29  | na | na | na | no |
| chr3 | 63071751 | 63073000 | ENSG00000244342 | LINC0069 | long intergenic nc intron |                | 0.020 | NO | 5.25  | 6.40  | na | na | na | no |
| chr3 | 64900751 | 64902000 | ENSG00000241684 | ADAMTS9  | ADAMTS9                   | antiser intron | 0.034 | NO | 9.00  | 10.94 | na | na | na | no |
| chr3 | 63066751 | 63068000 | ENSG00000244342 | LINC0069 | long intergenic nc intron |                | 0.037 | NO | 3.40  | 4.13  | na | na | na | no |
| chr3 | 64823001 | 64825000 | ENSG00000241684 | ADAMTS9  | ADAMTS9                   | antiser intron | 0.005 | NO | 13.82 | 16.72 | na | na | na | no |
| chr3 | 64863751 | 64865000 | ENSG00000241684 | ADAMTS9  | ADAMTS9                   | antiser intron | 0.000 | NO | 8.22  | 9.91  | na | na | na | no |
| chr3 | 64724001 | 64725500 | ENSG00000241684 | ADAMTS9  | ADAMTS9                   | antiser intron | 0.016 | NO | 10.70 | 12.80 | na | na | na | no |
| chr3 | 64704001 | 64705500 | ENSG00000241684 | ADAMTS9  | ADAMTS9                   | antiser intron | 0.005 | NO | 10.92 | 13.01 | na | na | na | no |
| chr3 | 64894001 | 64895250 | ENSG00000241684 | ADAMTS9  | ADAMTS9                   | antiser intron | 0.001 | NO | 10.42 | 12.39 | na | na | na | no |
| chr3 | 64706251 | 64707500 | ENSG00000241684 | ADAMTS9  | ADAMTS9                   | antiser intron | 0.001 | NO | 6.10  | 7.23  | na | na | na | no |
| chr3 | 64776501 | 64777750 | ENSG00000241684 | ADAMTS9  | ADAMTS9                   | antiser intron | 0.038 | NO | 7.37  | 8.67  | na | na | na | no |
| chr3 | 64719501 | 64720750 | ENSG00000241684 | ADAMTS9  | ADAMTS9                   | antiser intron | 0.001 | NO | 4.25  | 4.95  | na | na | na | no |

|      |          |          |                 |          |         |                  |       |    |       |       |    |    |    |    |
|------|----------|----------|-----------------|----------|---------|------------------|-------|----|-------|-------|----|----|----|----|
| chr3 | 64886501 | 64888000 | ENSG00000241684 | ADAMTS9  | ADAMTS9 | antiser intron   | 0.011 | NO | 11.20 | 12.80 | na | na | na | no |
| chr3 | 64935001 | 64936750 | ENSG00000241684 | ADAMTS9  | ADAMTS9 | antiser intron   | 0.004 | NO | 11.98 | 13.62 | na | na | na | no |
| chr3 | 64775751 | 64777000 | ENSG00000241684 | ADAMTS9  | ADAMTS9 | antiser intron   | 0.023 | NO | 7.23  | 8.05  | na | na | na | no |
| chr3 | 64814251 | 64815500 | ENSG00000241684 | ADAMTS9  | ADAMTS9 | antiser intron   | 0.002 | NO | 9.50  | 10.53 | na | na | na | no |
| chr3 | 64842251 | 64843750 | ENSG00000241684 | ADAMTS9  | ADAMTS9 | antiser intron   | 0.019 | NO | 10.28 | 11.35 | na | na | na | no |
| chr3 | 64945001 | 64946250 | ENSG00000241684 | ADAMTS9  | ADAMTS9 | antiser intron   | 0.009 | NO | 9.00  | 9.91  | na | na | na | no |
| chr3 | 64920251 | 64921500 | ENSG00000241684 | ADAMTS9  | ADAMTS9 | antiser intron   | 0.001 | NO | 9.64  | 10.53 | na | na | na | no |
| chr3 | 64867501 | 64869000 | ENSG00000241684 | ADAMTS9  | ADAMTS9 | antiser intron   | 0.001 | NO | 10.07 | 10.94 | na | na | na | no |
| chr3 | 64929751 | 64931000 | ENSG00000241684 | ADAMTS9  | ADAMTS9 | antiser intron   | 0.003 | NO | 10.00 | 10.73 | na | na | na | no |
| chr3 | 64679001 | 64680500 | ENSG00000241684 | ADAMTS9  | ADAMTS9 | antiser intron   | 0.013 | NO | 11.34 | 12.18 | na | na | na | no |
| chr3 | 64903501 | 64905000 | ENSG00000241684 | ADAMTS9  | ADAMTS9 | antiser intron   | 0.000 | NO | 10.78 | 11.56 | na | na | na | no |
| chr3 | 64693501 | 64694750 | ENSG00000241684 | ADAMTS9  | ADAMTS9 | antiser intron   | 0.039 | NO | 7.73  | 8.26  | na | na | na | no |
| chr3 | 64912251 | 64913500 | ENSG00000241684 | ADAMTS9  | ADAMTS9 | antiser intron   | 0.049 | NO | 8.93  | 9.50  | na | na | na | no |
| chr3 | 64841751 | 64843000 | ENSG00000241684 | ADAMTS9  | ADAMTS9 | antiser intron   | 0.043 | NO | 8.58  | 9.08  | na | na | na | no |
| chr3 | 64760501 | 64762000 | ENSG00000241684 | ADAMTS9  | ADAMTS9 | antiser intron   | 0.017 | NO | 8.93  | 9.29  | na | na | na | no |
| chr3 | 64916001 | 64917500 | ENSG00000241684 | ADAMTS9  | ADAMTS9 | antiser intron   | 0.005 | NO | 10.99 | 11.35 | na | na | na | no |
| chr3 | 64946251 | 64947500 | ENSG00000241684 | ADAMTS9  | ADAMTS9 | antiser intron   | 0.010 | NO | 7.02  | 7.23  | na | na | na | no |
| chr3 | 64945501 | 64946750 | ENSG00000241684 | ADAMTS9  | ADAMTS9 | antiser intron   | 0.028 | NO | 6.88  | 7.02  | na | na | na | no |
| chr3 | 64813751 | 64815000 | ENSG00000241684 | ADAMTS9  | ADAMTS9 | antiser intron   | 0.017 | NO | 10.78 | 10.94 | na | na | na | no |
| chr3 | 64886001 | 64887250 | ENSG00000241684 | ADAMTS9  | ADAMTS9 | antiser intron   | 0.005 | NO | 11.27 | 11.35 | na | na | na | no |
| chr3 | 64877251 | 64878750 | ENSG00000241684 | ADAMTS9  | ADAMTS9 | antiser intron   | 0.001 | NO | 11.13 | 11.15 | na | na | na | no |
| chr3 | 64908001 | 64909250 | ENSG00000241684 | ADAMTS9  | ADAMTS9 | antiser intron   | 0.028 | NO | 9.71  | 9.70  | na | na | na | no |
| chr3 | 63992251 | 63994000 | ENSG00000239653 | PSMD6-A' | PSMD6   | antisense intron | 0.006 | NO | 14.46 | 14.24 | na | na | na | no |
| chr3 | 64743751 | 64745000 | ENSG00000241684 | ADAMTS9  | ADAMTS9 | antiser intron   | 0.000 | NO | 8.51  | 8.26  | na | na | na | no |
| chr3 | 64861501 | 64862750 | ENSG00000241684 | ADAMTS9  | ADAMTS9 | antiser intron   | 0.002 | NO | 6.66  | 6.40  | na | na | na | no |
| chr3 | 64885501 | 64886750 | ENSG00000241684 | ADAMTS9  | ADAMTS9 | antiser intron   | 0.034 | NO | 9.71  | 9.29  | na | na | na | no |
| chr3 | 64836001 | 64837500 | ENSG00000241684 | ADAMTS9  | ADAMTS9 | antiser intron   | 0.000 | NO | 12.97 | 12.39 | na | na | na | no |
| chr3 | 64905001 | 64906500 | ENSG00000241684 | ADAMTS9  | ADAMTS9 | antiser intron   | 0.007 | NO | 10.85 | 10.32 | na | na | na | no |
| chr3 | 64890501 | 64891750 | ENSG00000241684 | ADAMTS9  | ADAMTS9 | antiser intron   | 0.001 | NO | 7.73  | 7.02  | na | na | na | no |
| chr3 | 64902751 | 64904250 | ENSG00000241684 | ADAMTS9  | ADAMTS9 | antiser intron   | 0.005 | NO | 12.97 | 11.77 | na | na | na | no |
| chr3 | 64818501 | 64819750 | ENSG00000241684 | ADAMTS9  | ADAMTS9 | antiser intron   | 0.000 | NO | 11.34 | 10.12 | na | na | na | no |

|       |           |           |                 |               |         |                          |       |     |       |       |    |    |    |    |
|-------|-----------|-----------|-----------------|---------------|---------|--------------------------|-------|-----|-------|-------|----|----|----|----|
| chr3  | 64917001  | 64918250  | ENSG00000241684 | ADAMTS9       | ADAMTS9 | antiser intron           | 0.009 | NO  | 10.07 | 8.88  | na | na | na | no |
| chr3  | 64944251  | 64945750  | ENSG00000241684 | ADAMTS9       | ADAMTS9 | antiser intron           | 0.022 | NO  | 13.04 | 11.35 | na | na | na | no |
| chr3  | 64849501  | 64850750  | ENSG00000241684 | ADAMTS9       | ADAMTS9 | antiser intron           | 0.000 | NO  | 9.29  | 8.05  | na | na | na | no |
| chr3  | 64813001  | 64814250  | ENSG00000241684 | ADAMTS9       | ADAMTS9 | antiser intron           | 0.001 | NO  | 10.35 | 8.67  | na | na | na | no |
| chr3  | 64778751  | 64780000  | ENSG00000241684 | ADAMTS9       | ADAMTS9 | antiser intron           | 0.000 | NO  | 10.56 | 8.67  | na | na | na | no |
| chr3  | 64943751  | 64945000  | ENSG00000241684 | ADAMTS9       | ADAMTS9 | antiser intron           | 0.041 | NO  | 12.05 | 9.70  | na | na | na | no |
| chr3  | 64888001  | 64889500  | ENSG00000241684 | ADAMTS9       | ADAMTS9 | antiser intron           | 0.012 | NO  | 11.34 | 8.67  | na | na | na | no |
| chr20 | 37858751  | 37860125  | ENSG00000230324 | RP4-705O1.1   |         | upstre                   | 0.004 | NO  | 0.57  | 2.27  | na | na | na | no |
| chr3  | 5027751   | 5029250   | ENSG00000235831 | BHLHE40-      | BHLHE40 | antisens upstre          | 0.001 | NO  | 2.69  | 9.50  | na | na | na | no |
| chr11 | 65186001  | 65187250  | ENSG00000245532 | NEAT1         |         | nuclear paraspecl upstre | 0.006 | NO  | 1.42  | 3.30  | na | na | na | no |
| chr9  | 96927751  | 96929125  | ENSG00000199165 | MIRLET7A      |         | microRNA let-7a- upstre  | 0.001 | NO  | 3.62  | 7.23  | na | na | na | no |
| chr9  | 96928376  | 96929625  | ENSG00000199165 | MIRLET7A      |         | microRNA let-7a- upstre  | 0.047 | NO  | 4.18  | 7.64  | na | na | na | no |
| chr18 | 110501    | 111875    | ENSG00000263006 | ROCK1P1       |         | Rho-associated, c upstre | 0.000 | NO  | 2.41  | 4.34  | na | na | na | no |
| chr11 | 65188126  | 65189625  | ENSG00000245532 | NEAT1         |         | nuclear paraspecl upstre | 0.019 | NO  | 2.91  | 4.75  | na | na | na | no |
| chr1  | 64032751  | 64034000  | NA              | NA            | NA      | exon                     | 0.006 | YES | 0.35  | 1.65  | na | na | na | na |
| chr1  | 73259751  | 73261125  | ENSG00000225087 | RP4-660H19.1  |         | intron                   | 0.017 | YES | 0.50  | 2.68  | na | na | na | na |
| chr1  | 14109251  | 14110500  | NA              | NA            | NA      | 3UTR                     | 0.043 | YES | 0.21  | 1.86  | na | na | na | na |
| chr3  | 95385376  | 95386625  | ENSG00000244681 | RP11-219E24.1 |         | intron                   | 0.019 | YES | 0.92  | 1.86  | na | na | na | na |
| chr3  | 152203876 | 152205250 | ENSG00000243305 | RP11-362A9.3  |         | intron                   | 0.018 | YES | 0.78  | 2.27  | na | na | na | na |
| chr3  | 156892251 | 156893500 | ENSG00000243176 | RP11-550I24.2 |         | exon                     | 0.000 | YES | 6.31  | 8.26  | na | na | na | na |
| chr3  | 176340251 | 176341500 | ENSG00000223715 | RP11-71G7.1   |         | intron                   | 0.011 | YES | 0.21  | 2.27  | na | na | na | na |
| chr4  | 1403751   | 1405000   | ENSG00000235608 | NKX1-1        |         | NK1 homeobox 1 upstre    | 0.000 | YES | 1.21  | 3.72  | na | na | na | na |
| chr4  | 19226751  | 19228000  | ENSG00000248238 | RP11-3J1.1    |         | intron                   | 0.039 | YES | 0.21  | 2.27  | na | na | na | na |
| chr4  | 36024626  | 36025875  | ENSG00000251160 | RP11-399D2.1  |         | intron                   | 0.029 | YES | 0.21  | 2.06  | na | na | na | na |
| chr4  | 42378126  | 42379375  | ENSG00000250781 | RP11-63A11.1  |         | intron                   | 0.014 | YES | 0.14  | 1.45  | na | na | na | na |
| chr4  | 76649126  | 76650500  | NA              | NA            | NA      | 5UTR                     | 0.000 | YES | 1.84  | 5.37  | na | na | na | na |
| chr5  | 98264126  | 98265625  | ENSG00000248489 | CTD-2007H13.3 |         | exon                     | 0.000 | YES | 4.96  | 8.67  | na | na | na | na |
| chr6  | 10403751  | 10405250  | NA              | NA            | NA      | exon                     | 0.000 | YES | 3.47  | 7.02  | na | na | na | na |
| chr6  | 13198501  | 13199875  | NA              | NA            | NA      | intron                   | 0.000 | YES | 2.27  | 4.95  | na | na | na | na |
| chr6  | 28993876  | 28995125  | ENSG00000223677 | OR2AD1P       |         | olfactory recepto exon   | 0.016 | YES | 0.64  | 2.06  | na | na | na | na |
| chr7  | 30067251  | 30068750  | NA              | NA            | NA      | 5UTR                     | 0.000 | YES | 1.21  | 5.16  | na | na | na | na |

|       |           |           |                 |               |                    |        |       |     |       |       |    |    |    |    |
|-------|-----------|-----------|-----------------|---------------|--------------------|--------|-------|-----|-------|-------|----|----|----|----|
| chr7  | 139024501 | 139025875 | NA              | NA            | NA                 | 5UTR   | 0.000 | YES | 2.13  | 5.78  | na | na | na | na |
| chrX  | 11058751  | 11060125  | ENSG00000234129 | RP11-120D5.1  |                    | intron | 0.000 | YES | 1.13  | 2.89  | na | na | na | na |
| chr8  | 87221126  | 87222375  | ENSG00000253699 | CTD-3118D11.3 |                    | intron | 0.034 | YES | 1.49  | 3.72  | na | na | na | na |
| chr8  | 106819376 | 106820625 | ENSG00000251003 | RP11-152P17.2 |                    | intron | 0.036 | YES | 1.21  | 3.30  | na | na | na | na |
| chr8  | 128716001 | 128717375 | ENSG00000249375 | RP11-1136L8.1 |                    | intron | 0.012 | YES | 0.64  | 3.10  | na | na | na | na |
| chr10 | 7139251   | 7140625   | ENSG00000223581 | RP11-393K12.2 |                    | exon   | 0.003 | YES | 0.57  | 3.51  | na | na | na | na |
| chr11 | 62608251  | 62610000  | ENSG00000222328 | RNU2-2        | RNA, U2 small nu   | exon   | 0.000 | YES | 15.10 | 13.42 | na | na | na | na |
| chr12 | 54672751  | 54675000  | NA              | NA            | NA                 | 5UTR   | 0.000 | YES | 13.89 | 30.76 | na | na | na | na |
| chr12 | 54674251  | 54675625  | NA              | NA            | NA                 | 5UTR   | 0.000 | YES | 4.04  | 10.32 | na | na | na | na |
| chr12 | 120728751 | 120730375 | ENSG00000202538 | RNU4-2        | RNA, U4 small nu   | exon   | 0.000 | YES | 10.78 | 8.67  | na | na | na | na |
| chr13 | 40434126  | 40435375  | ENSG00000212553 | SNORD110      | Small nucleolar R  | upstre | 0.010 | YES | 1.13  | 3.10  | na | na | na | na |
| chr14 | 87997751  | 87999000  | ENSG00000258859 | RP11-594C13.1 |                    | intron | 0.010 | YES | 0.28  | 2.27  | na | na | na | na |
| chr16 | 66585751  | 66587125  | ENSG00000217555 | CKLF          | chemokine-like fa  | 5UTR   | 0.000 | YES | 3.47  | 7.23  | na | na | na | na |
| chr17 | 10523626  | 10525125  | ENSG00000214970 | CTC-297N7.7   |                    | exon   | 0.003 | YES | 0.71  | 3.51  | na | na | na | na |
| chr17 | 50311751  | 50313000  | ENSG00000252109 | snoZ178       | Small nucleolar R  | upstre | 0.007 | YES | 0.85  | 1.65  | na | na | na | na |
| chr17 | 56708376  | 56709875  | ENSG00000212195 | U3            | Small nucleolar R  | exon   | 0.000 | YES | 30.55 | 26.22 | na | na | na | na |
| chr17 | 56735751  | 56737375  | ENSG00000202077 | U1            | U1 spliceosomal F  | exon   | 0.000 | YES | 43.17 | 46.03 | na | na | na | na |
| chr1  | 108870626 | 108871875 | ENSG00000241361 | RP11-483I13.3 |                    | intron | 0.020 | YES | 1.91  | 2.89  | na | na | na | na |
| chr17 | 59952126  | 59953375  | NA              | NA            | NA                 | exon   | 0.034 | YES | 12.05 | 12.18 | na | na | na | na |
| chr17 | 63551876  | 63553375  | ENSG00000266076 | CTD-2535L24.2 |                    | intron | 0.000 | YES | 6.38  | 9.70  | na | na | na | na |
| chr17 | 80172751  | 80174125  | ENSG00000264548 | RP13-516M14.2 |                    | exon   | 0.002 | YES | 0.50  | 4.54  | na | na | na | na |
| chr1  | 114550876 | 114552375 | NA              | NA            | NA                 | upstre | 0.000 | YES | 4.40  | 6.40  | na | na | na | na |
| chr1  | 117013376 | 117014875 | ENSG00000233154 | RP4-655J12.4  |                    | intron | 0.000 | YES | 7.09  | 10.12 | na | na | na | na |
| chr1  | 145382126 | 145383500 | ENSG00000233396 | RP11-458D21.1 |                    | exon   | 0.001 | YES | 6.24  | 3.30  | na | na | na | na |
| chr1  | 147806001 | 147807500 | ENSG00000202408 | U1            | U1 spliceosomal F  | exon   | 0.000 | YES | 5.10  | 5.57  | na | na | na | na |
| chr1  | 152926501 | 152927875 | ENSG00000224308 | RP1-13P20.6   |                    | upstre | 0.000 | YES | 1.06  | 4.34  | na | na | na | na |
| chr1  | 37939501  | 37940875  | NA              | NA            | NA                 | 5UTR   | 0.000 | YES | 2.55  | 4.34  | na | na | na | na |
| chr20 | 34337876  | 34339250  | ENSG00000225357 | RPF2P1        | ribosome product   | upstre | 0.000 | YES | 0.64  | 1.65  | na | na | na | na |
| chr1  | 171797126 | 171798375 | ENSG00000224600 | RP4-612B18.1  |                    | upstre | 0.037 | YES | 0.71  | 2.48  | na | na | na | na |
| chr20 | 43991126  | 43992375  | ENSG00000204070 | SYS1          | SYS1 Golgi-localiz | 5UTR   | 0.000 | YES | 4.61  | 5.78  | na | na | na | na |
| chr1  | 45196001  | 45197500  | ENSG00000200169 | RNU5D-1       | RNA, U5D small n   | exon   | 0.000 | YES | 6.52  | 4.13  | na | na | na | na |

|       |           |           |                 |                   |                  |      |       |     |      |       |    |    |    |    |
|-------|-----------|-----------|-----------------|-------------------|------------------|------|-------|-----|------|-------|----|----|----|----|
| chr2  | 27356751  | 27358250  | NA              | NA                | NA               | 5UTR | 0.000 | YES | 5.25 | 12.18 | na | na | na | na |
| chr1  | 52831251  | 52832625  | NA              | NA                | NA               | exon | 0.000 | YES | 1.91 | 5.16  | na | na | na | na |
| chr2  | 88315251  | 88316625  | ENSG00000222724 | U2                | U2 spliceosomal  | Exon | 0.001 | YES | 5.67 | 4.34  | na | na | na | na |
| chr2  | 122287876 | 122289375 | ENSG00000265451 | RP11-204L24.2     |                  | exon | 0.000 | YES | 7.44 | 6.61  | na | na | na | na |
| chr19 | 7968001   | 7969500   | ENSG00000214248 | AC010336          | Uncharacterized  | 5UTR | 0.000 | YES | 3.26 | 5.16  | na | na | na | na |
| chr19 | 14228001  | 14229375  | NA              | NA                | NA               | 5UTR | 0.000 | YES | 1.91 | 3.72  | na | na | na | na |
| chr19 | 47728626  | 47730250  | NA              | NA                | NA               | exon | 0.000 | YES | 3.62 | 6.19  | na | na | na | na |
| chr22 | 19841751  | 19843250  | ENSG00000215012 | C22orf29          | chromosome 22 c  | exon | 0.000 | YES | 3.83 | 7.23  | na | na | na | na |
| chr21 | 42932001  | 42933375  | ENSG00000232806 | AP001610.9        |                  | exon | 0.000 | YES | 3.69 | 5.57  | na | na | na | na |
| chr22 | 23212501  | 23213750  | ENSG00000211672 | IGLV4-3           | immunoglobulin I | 5UTR | 0.021 | NO  | 0.64 | 2.27  | na | na | na | na |
| chr11 | 126173251 | 126174625 | ENSG00000255062 | RP11-712I         | Uncharacterized  | 5UTR | 0.000 | NO  | 1.28 | 4.34  | na | na | na | na |
| chr19 | 36268626  | 36269875  | NA              | NA                | NA               | 5UTR | 0.036 | NO  | 0.71 | 1.45  | na | na | na | na |
| chr10 | 88281001  | 88282250  | NA              | NA                | NA               | 5UTR | 0.041 | NO  | 1.70 | 3.10  | na | na | na | na |
| chr1  | 85741376  | 85742625  | NA              | NA                | NA               | 5UTR | 0.039 | NO  | 2.91 | 4.95  | na | na | na | na |
| chr7  | 100026501 | 100027875 | NA              | NA                | NA               | 5UTR | 0.002 | NO  | 4.11 | 6.19  | na | na | na | na |
| chr9  | 139780126 | 139781500 | NA              | NA                | NA               | 5UTR | 0.002 | NO  | 3.19 | 3.10  | na | na | na | na |
| chr17 | 31259126  | 31260375  | NA              | NA                | NA               | exon | 0.014 | NO  | 0.07 | 1.24  | na | na | na | na |
| chr4  | 38494876  | 38496250  | ENSG00000249534 | RP11-83C7.2       |                  | exon | 0.037 | NO  | 0.21 | 2.06  | na | na | na | na |
| chr3  | 137990626 | 137991875 | NA              | NA                | NA               | exon | 0.033 | NO  | 0.35 | 2.68  | na | na | na | na |
| chr19 | 32146126  | 32147375  | ENSG00000252780 | RNA5SP47          | RNA, 5S ribosoma | exon | 0.009 | NO  | 0.43 | 2.27  | na | na | na | na |
| chr6  | 21601501  | 21602750  | ENSG00000220771 | RP3-322L4.2       |                  | exon | 0.010 | NO  | 0.85 | 3.92  | na | na | na | na |
| chr22 | 39319501  | 39320750  | ENSG00000235209 | CTA-150C2.13      |                  | exon | 0.039 | NO  | 0.50 | 2.27  | na | na | na | na |
| chr20 | 24426751  | 24428000  | ENSG00000234069 | GAPDHP5           | glyceraldehyde 3 | exon | 0.015 | NO  | 0.64 | 2.68  | na | na | na | na |
| chr20 | 19738126  | 19739375  | ENSG00000233895 | RP1-122P22.2      |                  | exon | 0.041 | NO  | 1.63 | 6.40  | na | na | na | na |
| chr3  | 121719501 | 121720750 | NA              | NA                | NA               | exon | 0.043 | NO  | 0.64 | 2.27  | na | na | na | na |
| chr17 | 29163876  | 29165125  | NA              | NA                | NA               | exon | 0.013 | NO  | 0.35 | 1.24  | na | na | na | na |
| chr1  | 174925751 | 174927000 | NA              | NA                | NA               | exon | 0.047 | NO  | 0.78 | 2.68  | na | na | na | na |
| chr21 | 37413876  | 37415125  | NA              | NA                | NA               | exon | 0.035 | NO  | 0.78 | 2.68  | na | na | na | na |
| chr5  | 132583751 | 132585000 | ENSG00000249478 | CTB-49A3.5        |                  | exon | 0.008 | NO  | 0.85 | 2.89  | na | na | na | na |
| chr6  | 143266751 | 143268000 | ENSG00000224460 | RP11-439L18.2     |                  | exon | 0.001 | NO  | 1.42 | 4.75  | na | na | na | na |
| chr22 | 22693876  | 22695125  | ENSG00000225724 | LL22NC03-80A10.11 |                  | exon | 0.031 | NO  | 0.64 | 2.06  | na | na | na | na |



|       |           |           |                 |               |                    |       |       |      |      |      |    |    |    |
|-------|-----------|-----------|-----------------|---------------|--------------------|-------|-------|------|------|------|----|----|----|
| chr15 | 53421251  | 53422500  | ENSG00000259237 | RP11-209E8.1  | exon               | 0.006 | NO    | 1.28 | 4.13 | na   | na | na | na |
| chr17 | 36713876  | 36715250  | NA              | NA            | NA                 | exon  | 0.008 | NO   | 0.92 | 2.89 | na | na | na |
| chr1  | 207991751 | 207993000 | ENSG00000203709 | C1orf132      | chromosome 1 or    | exon  | 0.001 | NO   | 0.99 | 3.10 | na | na | na |
| chr17 | 80250126  | 80251375  | ENSG00000265692 | RP13-516M14.4 |                    | exon  | 0.040 | NO   | 1.91 | 5.57 | na | na | na |
| chr19 | 39330876  | 39332125  | NA              | NA            | NA                 | exon  | 0.016 | NO   | 0.57 | 1.65 | na | na | na |
| chr3  | 27673876  | 27675125  | ENSG00000213846 | AC098614.2    |                    | exon  | 0.046 | NO   | 0.71 | 2.06 | na | na | na |
| chr19 | 6744376   | 6745750   | NA              | NA            | NA                 | exon  | 0.029 | NO   | 1.13 | 3.10 | na | na | na |
| chr20 | 13561376  | 13563125  | NA              | NA            | NA                 | exon  | 0.000 | NO   | 1.06 | 2.89 | na | na | na |
| chr20 | 30666751  | 30668000  | NA              | NA            | NA                 | exon  | 0.047 | NO   | 0.71 | 1.86 | na | na | na |
| chr11 | 46529501  | 46530750  | NA              | NA            | NA                 | exon  | 0.030 | NO   | 1.13 | 2.89 | na | na | na |
| chr15 | 92662876  | 92664125  | NA              | NA            | NA                 | exon  | 0.009 | NO   | 0.99 | 2.48 | na | na | na |
| chr20 | 25653376  | 25654625  | ENSG00000213742 | RP4-694B14.5  |                    | exon  | 0.017 | NO   | 0.78 | 1.86 | na | na | na |
| chr20 | 30666251  | 30667625  | NA              | NA            | NA                 | exon  | 0.008 | NO   | 0.78 | 1.86 | na | na | na |
| chr14 | 74952501  | 74953750  | NA              | NA            | NA                 | exon  | 0.029 | NO   | 1.35 | 2.89 | na | na | na |
| chr1  | 200638251 | 200639625 | ENSG00000260088 | RP11-92G12.3  |                    | exon  | 0.009 | NO   | 2.27 | 4.75 | na | na | na |
| chr3  | 27673501  | 27674750  | ENSG00000213846 | AC098614.2    |                    | exon  | 0.044 | NO   | 0.99 | 2.06 | na | na | na |
| chr7  | 1199251   | 1200625   | NA              | NA            | NA                 | exon  | 0.000 | NO   | 1.91 | 3.92 | na | na | na |
| chr19 | 11095751  | 11097125  | NA              | NA            | NA                 | exon  | 0.022 | NO   | 1.35 | 2.68 | na | na | na |
| chr1  | 8085626   | 8086875   | ENSG00000238290 | RP11-431K24.1 |                    | exon  | 0.019 | NO   | 1.77 | 3.51 | na | na | na |
| chr3  | 15080251  | 15081500  | NA              | NA            | NA                 | exon  | 0.010 | NO   | 1.91 | 3.72 | na | na | na |
| chr20 | 23338251  | 23339750  | ENSG00000232645 | RP3-322G13.5  |                    | exon  | 0.003 | NO   | 1.91 | 3.72 | na | na | na |
| chr7  | 39988376  | 39989625  | ENSG00000259826 | RP11-467D6.1  |                    | exon  | 0.027 | NO   | 2.06 | 3.92 | na | na | na |
| chr13 | 26625501  | 26626875  | ENSG00000231983 | LINC0041!     | long intergenic nc | exon  | 0.000 | NO   | 2.84 | 5.37 | na | na | na |
| chr12 | 11323251  | 11324500  | ENSG00000256537 | RP11-785H5.1  |                    | exon  | 0.019 | NO   | 1.21 | 2.27 | na | na | na |
| chr20 | 30586501  | 30588125  | ENSG00000260903 | RP1-310O13.12 |                    | exon  | 0.003 | NO   | 1.35 | 2.48 | na | na | na |
| chr1  | 1004001   | 1005250   | ENSG00000217801 | RP11-465B22.3 |                    | exon  | 0.037 | NO   | 2.48 | 4.54 | na | na | na |
| chr20 | 20019126  | 20020500  | NA              | NA            | NA                 | exon  | 0.029 | NO   | 1.70 | 3.10 | na | na | na |
| chr16 | 3053376   | 3054750   | ENSG00000262362 | LA16c-380H5.2 |                    | exon  | 0.002 | NO   | 2.41 | 4.34 | na | na | na |
| chr20 | 46112876  | 46114125  | ENSG00000202186 | U6            | U6 spliceosomal F  | exon  | 0.010 | NO   | 4.47 | 7.84 | na | na | na |
| chr20 | 12844251  | 12846125  | ENSG00000233048 | RP5-1069C8.2  |                    | exon  | 0.000 | NO   | 1.63 | 2.68 | na | na | na |
| chr3  | 48700501  | 48701750  | ENSG00000228350 | RP11-148G20.1 |                    | exon  | 0.040 | NO   | 2.41 | 3.92 | na | na | na |

|       |           |           |                 |               |                   |      |       |    |       |       |    |    |    |    |
|-------|-----------|-----------|-----------------|---------------|-------------------|------|-------|----|-------|-------|----|----|----|----|
| chr3  | 64160001  | 64161250  | ENSG00000239926 | PRDX3P4       | peroxiredoxin 3 p | exon | 0.010 | NO | 8.08  | 12.39 | na | na | na | na |
| chr17 | 58139876  | 58141250  | ENSG00000267526 | RP11-178C3.6  |                   | exon | 0.005 | NO | 8.51  | 12.39 | na | na | na | na |
| chr1  | 107867501 | 107869125 | NA              | NA            | NA                | exon | 0.001 | NO | 8.08  | 11.77 | na | na | na | na |
| chr20 | 10153751  | 10155375  | ENSG00000230506 | RP11-416N4.4  |                   | exon | 0.004 | NO | 1.70  | 2.48  | na | na | na | na |
| chr3  | 136471001 | 136472250 | ENSG00000261758 | RP11-102M11.2 |                   | exon | 0.014 | NO | 3.47  | 4.75  | na | na | na | na |
| chr3  | 63733001  | 63734750  | ENSG00000224479 | AC136289.1    |                   | exon | 0.000 | NO | 12.55 | 17.13 | na | na | na | na |
| chr20 | 53204751  | 53206250  | NA              | NA            | NA                | exon | 0.000 | NO | 9.22  | 12.39 | na | na | na | na |
| chr3  | 64582001  | 64583250  | NA              | NA            | NA                | exon | 0.001 | NO | 9.57  | 12.80 | na | na | na | na |
| chr8  | 128749126 | 128750500 | NA              | NA            | NA                | exon | 0.002 | NO | 6.45  | 8.46  | na | na | na | na |
| chr3  | 64159251  | 64160750  | ENSG00000239926 | PRDX3P4       | peroxiredoxin 3 p | exon | 0.000 | NO | 9.43  | 12.18 | na | na | na | na |
| chr3  | 63755251  | 63756500  | ENSG00000224479 | AC136289.1    |                   | exon | 0.015 | NO | 5.81  | 7.43  | na | na | na | na |
| chr3  | 162832376 | 162833750 | ENSG00000244571 | RP11-535I24.2 |                   | exon | 0.018 | NO | 1.49  | 1.86  | na | na | na | na |
| chr20 | 46257876  | 46259250  | ENSG00000229853 | RP5-1049G16.4 |                   | exon | 0.003 | NO | 6.10  | 7.43  | na | na | na | na |
| chr1  | 114445876 | 114447250 | NA              | NA            | NA                | exon | 0.000 | NO | 8.51  | 10.32 | na | na | na | na |
| chr3  | 64553001  | 64554250  | NA              | NA            | NA                | exon | 0.007 | NO | 10.92 | 13.21 | na | na | na | na |
| chr3  | 64567501  | 64568750  | ENSG00000241158 | ADAMTS9       | ADAMTS9 antiser   | exon | 0.000 | NO | 7.02  | 8.46  | na | na | na | na |
| chr1  | 107360876 | 107362500 | ENSG00000237460 | RP11-233E12.1 |                   | exon | 0.000 | NO | 10.14 | 11.97 | na | na | na | na |
| chr3  | 64581501  | 64582750  | NA              | NA            | NA                | exon | 0.003 | NO | 10.92 | 12.59 | na | na | na | na |
| chr3  | 64433501  | 64434750  | ENSG00000244564 | RP11-14D22.1  |                   | exon | 0.007 | NO | 8.08  | 9.29  | na | na | na | na |
| chr20 | 53475001  | 53476375  | ENSG00000252089 | RNU4ATA       | RNA, U4atac smal  | exon | 0.004 | NO | 10.07 | 11.15 | na | na | na | na |
| chr20 | 48895126  | 48896500  | ENSG00000224397 | RP11-290F20.3 |                   | exon | 0.000 | NO | 3.76  | 4.13  | na | na | na | na |
| chr17 | 58125626  | 58126875  | NA              | NA            | NA                | exon | 0.017 | NO | 8.29  | 9.08  | na | na | na | na |
| chr1  | 107689626 | 107690875 | NA              | NA            | NA                | exon | 0.000 | NO | 7.09  | 7.64  | na | na | na | na |
| chr3  | 64641001  | 64642500  | NA              | NA            | NA                | exon | 0.014 | NO | 10.78 | 11.56 | na | na | na | na |
| chr3  | 64003501  | 64005250  | NA              | NA            | NA                | exon | 0.001 | NO | 14.39 | 15.07 | na | na | na | na |
| chr1  | 107360251 | 107361625 | ENSG00000237460 | RP11-233E12.1 |                   | exon | 0.004 | NO | 8.86  | 9.08  | na | na | na | na |
| chr3  | 64587251  | 64589250  | NA              | NA            | NA                | exon | 0.013 | NO | 15.53 | 15.90 | na | na | na | na |
| chr20 | 45918126  | 45919375  | NA              | NA            | NA                | exon | 0.040 | NO | 10.92 | 11.15 | na | na | na | na |
| chr3  | 63736001  | 63737250  | ENSG00000224479 | AC136289.1    |                   | exon | 0.002 | NO | 11.13 | 10.94 | na | na | na | na |
| chr1  | 107348126 | 107349625 | ENSG00000232551 | RP11-233E12.2 |                   | exon | 0.000 | NO | 6.31  | 6.19  | na | na | na | na |
| chr3  | 63739501  | 63741500  | ENSG00000224479 | AC136289.1    |                   | exon | 0.000 | NO | 21.91 | 21.26 | na | na | na | na |

|       |           |           |                 |                           |        |       |    |       |       |    |    |    |    |
|-------|-----------|-----------|-----------------|---------------------------|--------|-------|----|-------|-------|----|----|----|----|
| chr3  | 63738251  | 63740250  | ENSG00000224479 | AC136289.1                | exon   | 0.000 | NO | 22.76 | 21.47 | na | na | na | na |
| chr3  | 64588751  | 64590000  | NA              | NA NA                     | exon   | 0.007 | NO | 12.19 | 11.15 | na | na | na | na |
| chr17 | 58543751  | 58545000  | NA              | NA NA                     | exon   | 0.016 | NO | 8.93  | 7.02  | na | na | na | na |
| chr20 | 46255126  | 46256750  | NA              | NA NA                     | exon   | 0.001 | NO | 14.53 | 8.05  | na | na | na | na |
| chr1  | 147735251 | 147736500 | ENSG00000199879 | U1 U1 spliceosomal        | Exon   | 0.032 | NO | 5.03  | 2.27  | na | na | na | na |
| chr1  | 61249001  | 61250250  | ENSG00000231252 | RP11-436K8.1              | intron | 0.044 | NO | 0.28  | 2.48  | na | na | na | na |
| chr12 | 119669626 | 119670875 | ENSG00000256311 | RP11-64B16.5              | intron | 0.035 | NO | 0.57  | 4.75  | na | na | na | na |
| chr4  | 29127001  | 29128250  | ENSG00000248176 | RP11-472K22.1             | intron | 0.023 | NO | 0.21  | 1.45  | na | na | na | na |
| chr4  | 152589001 | 152590250 | ENSG00000251603 | RP11-164P12.4             | intron | 0.001 | NO | 0.64  | 3.51  | na | na | na | na |
| chr1  | 63646501  | 63647750  | ENSG00000271593 | RP11-335E6.4              | intron | 0.024 | NO | 0.50  | 2.68  | na | na | na | na |
| chr3  | 25201251  | 25202500  | ENSG00000237838 | AC133680.1                | intron | 0.018 | NO | 0.78  | 3.30  | na | na | na | na |
| chr16 | 5722501   | 5723750   | ENSG00000260411 | RP11-420N3.2              | intron | 0.040 | NO | 0.85  | 3.10  | na | na | na | na |
| chr15 | 99557501  | 99558750  | ENSG00000259475 | RP11-654A16.3             | intron | 0.038 | NO | 0.78  | 2.68  | na | na | na | na |
| chr3  | 177940251 | 177941500 | ENSG00000223930 | RP11-33A14.1              | intron | 0.013 | NO | 0.57  | 1.86  | na | na | na | na |
| chr18 | 42824626  | 42825875  | NA              | NA NA                     | intron | 0.043 | NO | 0.57  | 1.65  | na | na | na | na |
| chr4  | 127571751 | 127573000 | NA              | NA NA                     | intron | 0.018 | NO | 0.85  | 2.48  | na | na | na | na |
| chr1  | 177399001 | 177400250 | ENSG00000227579 | RP1-35C21.2               | intron | 0.032 | NO | 0.78  | 2.27  | na | na | na | na |
| chr20 | 11230751  | 11232250  | ENSG00000230990 | RP4-734C18.1              | intron | 0.007 | NO | 0.99  | 2.68  | na | na | na | na |
| chr3  | 34582251  | 34583500  | ENSG00000227498 | AC018359.3                | intron | 0.044 | NO | 0.92  | 2.48  | na | na | na | na |
| chr1  | 188912251 | 188913500 | ENSG00000226486 | RP11-373J16.1             | intron | 0.014 | NO | 0.85  | 2.27  | na | na | na | na |
| chr1  | 83385501  | 83386750  | ENSG00000230817 | RP4-601K24.1              | intron | 0.045 | NO | 0.71  | 1.86  | na | na | na | na |
| chr20 | 18338001  | 18339750  | ENSG00000230010 | RP4-568F9.6               | intron | 0.000 | NO | 1.28  | 3.30  | na | na | na | na |
| chr3  | 164926751 | 164928000 | ENSG00000244128 | RP11-85M11.2              | intron | 0.046 | NO | 0.99  | 2.48  | na | na | na | na |
| chr3  | 3596501   | 3597750   | ENSG00000223727 | AC026188.1                | intron | 0.021 | NO | 1.13  | 2.68  | na | na | na | na |
| chr1  | 206603751 | 206605000 | NA              | NA NA                     | intron | 0.037 | NO | 1.06  | 2.27  | na | na | na | na |
| chr1  | 177455376 | 177456625 | ENSG00000227579 | RP1-35C21.2               | intron | 0.045 | NO | 1.49  | 3.10  | na | na | na | na |
| chr12 | 68468751  | 68470125  | ENSG00000255733 | IFNG-AS1 IFNG antisense R | intron | 0.022 | NO | 1.63  | 2.89  | na | na | na | na |
| chr20 | 39739751  | 39741250  | ENSG00000226648 | RP1-1J6.2                 | intron | 0.003 | NO | 3.47  | 5.99  | na | na | na | na |
| chr20 | 9975876   | 9977375   | ENSG00000243961 | RP5-839B4.8               | intron | 0.007 | NO | 1.21  | 2.06  | na | na | na | na |
| chr1  | 199263251 | 199264500 | ENSG00000231718 | RP11-382E9.1              | intron | 0.024 | NO | 1.35  | 2.27  | na | na | na | na |
| chr3  | 63734001  | 63735250  | ENSG00000224479 | AC136289.1                | intron | 0.000 | NO | 6.95  | 11.56 | na | na | na | na |

|       |           |           |                 |                           |        |       |    |       |       |    |    |    |    |
|-------|-----------|-----------|-----------------|---------------------------|--------|-------|----|-------|-------|----|----|----|----|
| chr20 | 40631251  | 40632625  | ENSG00000225458 | RP5-1121H13.4             | intron | 0.002 | NO | 1.56  | 2.48  | na | na | na | na |
| chr13 | 34116126  | 34117375  | ENSG00000230490 | RP11-141M1.3              | intron | 0.008 | NO | 3.26  | 5.16  | na | na | na | na |
| chr20 | 57317626  | 57318875  | ENSG00000237121 | PIEZO1P2 piezo-type mecha | intron | 0.010 | NO | 2.91  | 4.54  | na | na | na | na |
| chr20 | 40620876  | 40622625  | ENSG00000225458 | RP5-1121H13.4             | intron | 0.001 | NO | 3.05  | 4.75  | na | na | na | na |
| chr3  | 63795501  | 63797000  | ENSG00000224479 | AC136289.1                | intron | 0.036 | NO | 3.40  | 5.16  | na | na | na | na |
| chr20 | 40655876  | 40657125  | ENSG00000225458 | RP5-1121H13.4             | intron | 0.024 | NO | 1.91  | 2.68  | na | na | na | na |
| chr20 | 40630876  | 40632125  | ENSG00000225458 | RP5-1121H13.4             | intron | 0.036 | NO | 1.49  | 2.06  | na | na | na | na |
| chr3  | 64555251  | 64556500  | ENSG00000241158 | ADAMTS9 ADAMTS9 antiser   | intron | 0.003 | NO | 5.67  | 7.84  | na | na | na | na |
| chr3  | 63734751  | 63736500  | ENSG00000224479 | AC136289.1                | intron | 0.011 | NO | 8.79  | 11.97 | na | na | na | na |
| chr3  | 63787251  | 63788500  | ENSG00000224479 | AC136289.1                | intron | 0.007 | NO | 5.81  | 7.84  | na | na | na | na |
| chr20 | 39733126  | 39734500  | ENSG00000226648 | RP1-1J6.2                 | intron | 0.000 | NO | 2.62  | 3.51  | na | na | na | na |
| chr3  | 63787751  | 63789000  | ENSG00000224479 | AC136289.1                | intron | 0.017 | NO | 5.88  | 7.84  | na | na | na | na |
| chr3  | 63754001  | 63755250  | ENSG00000224479 | AC136289.1                | intron | 0.000 | NO | 7.09  | 9.29  | na | na | na | na |
| chr3  | 14319751  | 14321000  | ENSG00000255021 | RP11-536I6.2              | intron | 0.002 | NO | 2.55  | 3.30  | na | na | na | na |
| chr20 | 39732126  | 39733500  | ENSG00000226648 | RP1-1J6.2                 | intron | 0.045 | NO | 2.69  | 3.10  | na | na | na | na |
| chr3  | 64552501  | 64553750  | ENSG00000241158 | ADAMTS9 ADAMTS9 antiser   | intron | 0.000 | NO | 9.15  | 10.32 | na | na | na | na |
| chr3  | 63753251  | 63754500  | ENSG00000224479 | AC136289.1                | intron | 0.017 | NO | 5.67  | 5.99  | na | na | na | na |
| chr1  | 107376501 | 107377750 | ENSG00000237460 | RP11-233E12.1             | intron | 0.011 | NO | 5.32  | 5.57  | na | na | na | na |
| chr20 | 52235751  | 52237000  | ENSG00000235415 | AC005808.3                | intron | 0.025 | NO | 7.59  | 7.84  | na | na | na | na |
| chr3  | 64561751  | 64563000  | ENSG00000241158 | ADAMTS9 ADAMTS9 antiser   | intron | 0.011 | NO | 11.06 | 11.35 | na | na | na | na |
| chr20 | 52227876  | 52229125  | ENSG00000235415 | AC005808.3                | intron | 0.047 | NO | 14.32 | 14.66 | na | na | na | na |
| chr20 | 46174626  | 46175875  | NA              | NA NA                     | intron | 0.026 | NO | 8.51  | 8.67  | na | na | na | na |
| chr1  | 107376001 | 107377250 | ENSG00000237460 | RP11-233E12.1             | intron | 0.005 | NO | 7.02  | 7.02  | na | na | na | na |
| chr20 | 57339376  | 57340875  | ENSG00000237121 | PIEZO1P2 piezo-type mecha | intron | 0.010 | NO | 2.91  | 2.89  | na | na | na | na |
| chr3  | 63731501  | 63732750  | ENSG00000224479 | AC136289.1                | intron | 0.019 | NO | 11.70 | 11.56 | na | na | na | na |
| chr20 | 46194126  | 46195375  | NA              | NA NA                     | intron | 0.049 | NO | 5.88  | 5.78  | na | na | na | na |
| chr3  | 63741001  | 63742500  | ENSG00000224479 | AC136289.1                | intron | 0.032 | NO | 9.78  | 9.50  | na | na | na | na |
| chr3  | 63732001  | 63733250  | ENSG00000224479 | AC136289.1                | intron | 0.006 | NO | 9.85  | 9.50  | na | na | na | na |
| chr20 | 52241126  | 52242625  | ENSG00000235415 | AC005808.3                | intron | 0.000 | NO | 7.94  | 7.64  | na | na | na | na |
| chr3  | 64058251  | 64060250  | ENSG00000241111 | RP11-129B22.1             | intron | 0.001 | NO | 18.36 | 16.72 | na | na | na | na |
| chr3  | 63731001  | 63732250  | ENSG00000224479 | AC136289.1                | intron | 0.005 | NO | 8.86  | 8.05  | na | na | na | na |

|       |           |           |                 |               |                    |        |       |    |       |       |    |    |    |    |
|-------|-----------|-----------|-----------------|---------------|--------------------|--------|-------|----|-------|-------|----|----|----|----|
| chr20 | 46243751  | 46245000  | NA              | NA            | NA                 | intron | 0.044 | NO | 8.51  | 6.81  | na | na | na | na |
| chr5  | 178394876 | 178396125 | ENSG00000254035 | RP11-281O15.4 |                    | promot | 0.017 | NO | 0.92  | 2.89  | na | na | na | na |
| chr13 | 30894251  | 30895500  | ENSG00000236463 | LINC00421     | long intergenic nc | promot | 0.022 | NO | 1.28  | 3.30  | na | na | na | na |
| chr1  | 117679251 | 117680625 | ENSG00000228453 | RP11-229A19.3 |                    | promot | 0.027 | NO | 2.27  | 3.10  | na | na | na | na |
| chr1  | 107359251 | 107360625 | ENSG00000237460 | RP11-233E12.1 |                    | promot | 0.007 | NO | 6.10  | 6.19  | na | na | na | na |
| chr4  | 66020251  | 66021500  | ENSG00000248998 | EFTUD1P2      | elongation factor  | upstre | 0.026 | NO | 0.14  | 1.65  | na | na | na | na |
| chr3  | 39385376  | 39386750  | ENSG00000238267 | RP11-241K18.2 |                    | upstre | 0.044 | NO | 0.43  | 2.06  | na | na | na | na |
| chr9  | 140023626 | 140024875 | ENSG00000238824 | snoU13        | Small nucleolar R  | upstre | 0.000 | NO | 1.28  | 3.92  | na | na | na | na |
| chr20 | 12301126  | 12302500  | ENSG00000230437 | RP11-102J14.1 |                    | upstre | 0.019 | NO | 0.78  | 2.27  | na | na | na | na |
| chr2  | 120974876 | 120976250 | ENSG00000224789 | AC012363.4    |                    | upstre | 0.009 | NO | 1.28  | 3.72  | na | na | na | na |
| chr20 | 6719251   | 6721000   | ENSG00000228482 | RP5-859D4.3   |                    | upstre | 0.012 | NO | 0.85  | 2.27  | na | na | na | na |
| chr20 | 4416626   | 4418000   | ENSG00000236387 | RP11-307O10.1 |                    | upstre | 0.010 | NO | 0.64  | 1.65  | na | na | na | na |
| chr6  | 43820501  | 43821750  | ENSG00000223469 | RP11-344J7.2  |                    | upstre | 0.029 | NO | 1.21  | 3.10  | na | na | na | na |
| chr16 | 75550501  | 75551875  | ENSG00000262583 | RP11-77K12.5  |                    | upstre | 0.000 | NO | 1.98  | 4.34  | na | na | na | na |
| chr20 | 24301126  | 24302375  | ENSG00000232200 | RP4-564O4.1   |                    | upstre | 0.021 | NO | 0.78  | 1.65  | na | na | na | na |
| chr3  | 24721376  | 24722625  | ENSG00000237838 | AC133680.1    |                    | upstre | 0.028 | NO | 1.21  | 2.48  | na | na | na | na |
| chr10 | 10094501  | 10095750  | ENSG00000224788 | RP5-933E2.1   |                    | upstre | 0.033 | NO | 1.28  | 2.27  | na | na | na | na |
| chr20 | 53480501  | 53481750  | ENSG00000252089 | RNU4ATA1      | RNA, U4atac smal   | upstre | 0.045 | NO | 5.46  | 9.08  | na | na | na | na |
| chr20 | 47093626  | 47094875  | NA              | NA            | NA                 | upstre | 0.048 | NO | 4.54  | 6.40  | na | na | na | na |
| chr20 | 46113501  | 46114875  | ENSG00000202186 | U6            | U6 spliceosomal F  | upstre | 0.022 | NO | 5.32  | 7.23  | na | na | na | na |
| chr1  | 107356501 | 107358250 | ENSG00000237460 | RP11-233E12.1 |                    | upstre | 0.000 | NO | 7.09  | 8.88  | na | na | na | na |
| chr1  | 116402626 | 116403875 | ENSG00000214204 | RP11-485H8.2  |                    | upstre | 0.044 | NO | 2.34  | 2.89  | na | na | na | na |
| chr20 | 53477626  | 53478875  | ENSG00000252089 | RNU4ATA1      | RNA, U4atac smal   | upstre | 0.016 | NO | 11.27 | 13.83 | na | na | na | na |
| chr20 | 53477251  | 53478500  | ENSG00000252089 | RNU4ATA1      | RNA, U4atac smal   | upstre | 0.025 | NO | 9.29  | 11.15 | na | na | na | na |
| chr20 | 46109626  | 46111000  | ENSG00000234075 | RPL35AP       | ribosomal protein  | upstre | 0.025 | NO | 7.30  | 8.05  | na | na | na | na |
| chr20 | 53485001  | 53486375  | ENSG00000252089 | RNU4ATA1      | RNA, U4atac smal   | upstre | 0.004 | NO | 8.86  | 9.70  | na | na | na | na |
| chr1  | 107355751 | 107357000 | ENSG00000237460 | RP11-233E12.1 |                    | upstre | 0.007 | NO | 5.32  | 5.37  | na | na | na | na |
| chr20 | 52547251  | 52548500  | ENSG00000236352 | AC005220.3    |                    | upstre | 0.003 | NO | 15.60 | 15.28 | na | na | na | na |
| chr20 | 52292876  | 52294125  | ENSG00000238468 | RNU7-14P      | RNA, U7 small nu   | upstre | 0.010 | NO | 8.86  | 7.64  | na | na | na | na |
| chr20 | 52548001  | 52549875  | ENSG00000236352 | AC005220.3    |                    | upstre | 0.003 | NO | 14.11 | 11.56 | na | na | na | na |
| chr20 | 52549876  | 52551125  | ENSG00000236352 | AC005220.3    |                    | upstre | 0.048 | NO | 17.23 | 14.04 | na | na | na | na |

|       |           |           |                 |               |                             |       |     |       |       |      |    |      |     |
|-------|-----------|-----------|-----------------|---------------|-----------------------------|-------|-----|-------|-------|------|----|------|-----|
| chr5  | 137805251 | 137806500 | ENSG00000241458 | RP11-461O14.1 | upstream                    | 0.032 | NO  | 13.26 | 4.34  | na   | na | na   | na  |
| chr3  | 152879251 | 152880750 | ENSG00000181467 | RAP2B         | RAP2B, member c 5UTR        | 0.000 | YES | 2.69  | 8.46  | down | up | up   | yes |
| chr10 | 74033001  | 74034375  | ENSG00000168209 | DDIT4         | DNA-damage-indi 5UTR        | 0.000 | YES | 2.20  | 4.75  | down | up | up   | yes |
| chr10 | 112256876 | 112258250 | ENSG00000138166 | DUSP5         | dual specificity p 5UTR     | 0.004 | NO  | 1.13  | 3.92  | down | up | up   | yes |
| chr5  | 68787876  | 68789250  | ENSG00000197822 | OCLN          | occludin [Source: 5UTR      | 0.000 | YES | 3.19  | 5.37  | down | up | up   | no  |
| chr6  | 31794876  | 31796250  | ENSG00000204388 | HSPA1B        | heat shock 70kDa 5UTR       | 0.001 | YES | 1.42  | 3.10  | down | up | up   | no  |
| chr20 | 50314626  | 50316000  | ENSG00000054793 | ATP9A         | ATPase, class II, ty intron | 0.017 | NO  | 1.91  | 4.13  | down | up | down | no  |
| chr20 | 50383376  | 50384625  | ENSG00000054793 | ATP9A         | ATPase, class II, ty intron | 0.041 | NO  | 3.97  | 7.23  | down | up | down | no  |
| chr3  | 189439001 | 189440375 | ENSG00000073282 | TP63          | tumor protein p6. intron    | 0.001 | YES | 2.34  | 3.30  | down | up | -    | yes |
| chr8  | 29207501  | 29208875  | ENSG00000120875 | DUSP4         | dual specificity p 5UTR     | 0.000 | YES | 1.13  | 4.75  | down | up | -    | yes |
| chr19 | 35738751  | 35740000  | ENSG00000105699 | LSR           | lipolysis stimulate 5UTR    | 0.000 | YES | 3.05  | 7.64  | down | up | -    | yes |
| chr19 | 35739251  | 35740625  | ENSG00000105699 | LSR           | lipolysis stimulate 5UTR    | 0.000 | YES | 3.26  | 6.40  | down | up | -    | yes |
| chr2  | 43453126  | 43454375  | ENSG00000152518 | ZFP36L2       | ZFP36 ring finger 5UTR      | 0.002 | NO  | 1.84  | 4.54  | down | up | -    | yes |
| chr5  | 150460126 | 150461500 | ENSG00000145901 | TNIP1         | TNFAIP3 interacti exon      | 0.007 | NO  | 1.70  | 4.54  | down | up | -    | yes |
| chr6  | 36647251  | 36648500  | ENSG00000124762 | CDKN1A        | cyclin-dependent exon       | 0.011 | NO  | 1.42  | 3.92  | down | up | -    | yes |
| chr1  | 161052876 | 161054125 | ENSG00000143217 | PVRL4         | poliovirus receptc intron   | 0.033 | NO  | 0.71  | 2.48  | down | up | -    | yes |
| chr10 | 71992501  | 71993875  | ENSG00000180817 | PPA1          | pyrophosphatase 5UTR        | 0.000 | YES | 2.62  | 3.92  | down | up | -    | no  |
| chr1  | 107773501 | 107775375 | ENSG00000162631 | NTNG1         | netrin G1 [Source intron    | 0.000 | YES | 7.66  | 14.24 | down | up | -    | no  |
| chr1  | 107843376 | 107844750 | ENSG00000162631 | NTNG1         | netrin G1 [Source intron    | 0.000 | YES | 6.38  | 8.46  | down | up | -    | no  |
| chr1  | 107843876 | 107845375 | ENSG00000162631 | NTNG1         | netrin G1 [Source intron    | 0.001 | YES | 6.95  | 10.12 | down | up | -    | no  |
| chr20 | 19983001  | 19984250  | ENSG00000132669 | RIN2          | Ras and Rab inter 3UTR      | 0.017 | NO  | 1.28  | 2.89  | down | up | -    | no  |
| chr20 | 19982501  | 19983875  | ENSG00000132669 | RIN2          | Ras and Rab inter 3UTR      | 0.005 | NO  | 1.70  | 2.89  | down | up | -    | no  |
| chr11 | 64084876  | 64086250  | ENSG00000126432 | PRDX5         | peroxiredoxin 5 [ 5UTR      | 0.007 | NO  | 2.84  | 4.75  | down | up | -    | no  |
| chr11 | 65554001  | 65555375  | ENSG00000172818 | OVOL1         | ovo-like 1(Drosop 5UTR      | 0.000 | NO  | 1.42  | 4.13  | down | up | -    | no  |
| chr6  | 89789751  | 89791125  | ENSG00000146278 | PNRC1         | proline-rich nucle 5UTR     | 0.016 | NO  | 2.62  | 2.89  | down | up | -    | no  |
| chr3  | 196750751 | 196752000 | ENSG00000163975 | MFI2          | antigen p97 (mel: exon      | 0.012 | NO  | 1.06  | 3.92  | down | up | -    | no  |
| chr1  | 107775126 | 107776875 | ENSG00000162631 | NTNG1         | netrin G1 [Source intron    | 0.001 | NO  | 5.74  | 10.32 | down | up | -    | no  |
| chr1  | 107832751 | 107834000 | ENSG00000162631 | NTNG1         | netrin G1 [Source intron    | 0.002 | NO  | 3.69  | 6.40  | down | up | -    | no  |
| chr1  | 107793126 | 107794750 | ENSG00000162631 | NTNG1         | netrin G1 [Source intron    | 0.007 | NO  | 6.45  | 10.32 | down | up | -    | no  |
| chr1  | 107790376 | 107791875 | ENSG00000162631 | NTNG1         | netrin G1 [Source intron    | 0.009 | NO  | 4.54  | 7.23  | down | up | -    | no  |
| chr1  | 107784501 | 107785875 | ENSG00000162631 | NTNG1         | netrin G1 [Source intron    | 0.002 | NO  | 4.75  | 7.23  | down | up | -    | no  |

|      |           |           |                 |       |                          |       |    |       |       |        |   |    |
|------|-----------|-----------|-----------------|-------|--------------------------|-------|----|-------|-------|--------|---|----|
| chr1 | 107793876 | 107795125 | ENSG00000162631 | NTNG1 | netrin G1 [Source intron | 0.031 | NO | 5.88  | 8.67  | dow up | - | no |
| chr1 | 107772876 | 107774125 | ENSG00000162631 | NTNG1 | netrin G1 [Source intron | 0.034 | NO | 6.03  | 8.88  | dow up | - | no |
| chr1 | 107832251 | 107833625 | ENSG00000162631 | NTNG1 | netrin G1 [Source intron | 0.008 | NO | 5.03  | 7.23  | dow up | - | no |
| chr1 | 107826001 | 107827375 | ENSG00000162631 | NTNG1 | netrin G1 [Source intron | 0.002 | NO | 5.03  | 7.02  | dow up | - | no |
| chr1 | 107821376 | 107822750 | ENSG00000162631 | NTNG1 | netrin G1 [Source intron | 0.002 | NO | 4.54  | 6.19  | dow up | - | no |
| chr1 | 107695626 | 107697125 | ENSG00000162631 | NTNG1 | netrin G1 [Source intron | 0.000 | NO | 6.52  | 8.88  | dow up | - | no |
| chr1 | 107863126 | 107864875 | ENSG00000162631 | NTNG1 | netrin G1 [Source intron | 0.002 | NO | 8.72  | 11.56 | dow up | - | no |
| chr1 | 107829251 | 107830500 | ENSG00000162631 | NTNG1 | netrin G1 [Source intron | 0.007 | NO | 5.32  | 7.02  | dow up | - | no |
| chr1 | 107745626 | 107747000 | ENSG00000162631 | NTNG1 | netrin G1 [Source intron | 0.004 | NO | 4.04  | 5.16  | dow up | - | no |
| chr1 | 107829751 | 107831125 | ENSG00000162631 | NTNG1 | netrin G1 [Source intron | 0.006 | NO | 4.89  | 6.19  | dow up | - | no |
| chr1 | 107710001 | 107711500 | ENSG00000162631 | NTNG1 | netrin G1 [Source intron | 0.012 | NO | 5.25  | 6.61  | dow up | - | no |
| chr1 | 107877001 | 107878375 | ENSG00000162631 | NTNG1 | netrin G1 [Source intron | 0.008 | NO | 5.46  | 6.81  | dow up | - | no |
| chr1 | 107698501 | 107699750 | ENSG00000162631 | NTNG1 | netrin G1 [Source intron | 0.000 | NO | 4.82  | 5.99  | dow up | - | no |
| chr1 | 107785376 | 107786625 | ENSG00000162631 | NTNG1 | netrin G1 [Source intron | 0.034 | NO | 4.68  | 5.78  | dow up | - | no |
| chr1 | 107715251 | 107716625 | ENSG00000162631 | NTNG1 | netrin G1 [Source intron | 0.008 | NO | 5.81  | 7.02  | dow up | - | no |
| chr1 | 107807376 | 107808625 | ENSG00000162631 | NTNG1 | netrin G1 [Source intron | 0.006 | NO | 6.17  | 7.43  | dow up | - | no |
| chr1 | 107801376 | 107802875 | ENSG00000162631 | NTNG1 | netrin G1 [Source intron | 0.009 | NO | 7.30  | 8.67  | dow up | - | no |
| chr1 | 107736876 | 107738250 | ENSG00000162631 | NTNG1 | netrin G1 [Source intron | 0.000 | NO | 6.24  | 7.23  | dow up | - | no |
| chr1 | 107770001 | 107771625 | ENSG00000162631 | NTNG1 | netrin G1 [Source intron | 0.001 | NO | 7.37  | 8.46  | dow up | - | no |
| chr1 | 107804876 | 107806250 | ENSG00000162631 | NTNG1 | netrin G1 [Source intron | 0.002 | NO | 6.88  | 7.84  | dow up | - | no |
| chr1 | 107908876 | 107910125 | ENSG00000162631 | NTNG1 | netrin G1 [Source intron | 0.010 | NO | 5.03  | 5.57  | dow up | - | no |
| chr1 | 107901376 | 107902625 | ENSG00000162631 | NTNG1 | netrin G1 [Source intron | 0.004 | NO | 7.30  | 8.05  | dow up | - | no |
| chr1 | 107819626 | 107820875 | ENSG00000162631 | NTNG1 | netrin G1 [Source intron | 0.000 | NO | 5.10  | 5.57  | dow up | - | no |
| chr1 | 107685626 | 107686875 | ENSG00000162631 | NTNG1 | netrin G1 [Source intron | 0.018 | NO | 5.88  | 6.40  | dow up | - | no |
| chr1 | 107742376 | 107744500 | ENSG00000162631 | NTNG1 | netrin G1 [Source intron | 0.001 | NO | 11.70 | 12.59 | dow up | - | no |
| chr1 | 107686751 | 107688000 | ENSG00000162631 | NTNG1 | netrin G1 [Source intron | 0.002 | NO | 7.66  | 8.05  | dow up | - | no |
| chr1 | 107688501 | 107689875 | ENSG00000162631 | NTNG1 | netrin G1 [Source intron | 0.003 | NO | 5.95  | 6.19  | dow up | - | no |
| chr1 | 107718001 | 107719375 | ENSG00000162631 | NTNG1 | netrin G1 [Source intron | 0.000 | NO | 6.81  | 7.02  | dow up | - | no |
| chr1 | 107749876 | 107751125 | ENSG00000162631 | NTNG1 | netrin G1 [Source intron | 0.029 | NO | 6.24  | 6.19  | dow up | - | no |
| chr1 | 107870126 | 107871500 | ENSG00000162631 | NTNG1 | netrin G1 [Source intron | 0.001 | NO | 6.31  | 6.19  | dow up | - | no |
| chr1 | 107735626 | 107736875 | ENSG00000162631 | NTNG1 | netrin G1 [Source intron | 0.028 | NO | 7.37  | 7.02  | dow up | - | no |

|       |           |           |                 |          |                           |       |     |       |       |              |   |    |
|-------|-----------|-----------|-----------------|----------|---------------------------|-------|-----|-------|-------|--------------|---|----|
| chr1  | 107925626 | 107927000 | ENSG00000162631 | NTNG1    | netrin G1 [Source intron  | 0.010 | NO  | 7.16  | 6.81  | dow up       | - | no |
| chr1  | 107796001 | 107797250 | ENSG00000162631 | NTNG1    | netrin G1 [Source intron  | 0.026 | NO  | 7.02  | 6.61  | dow up       | - | no |
| chr1  | 107687126 | 107688375 | ENSG00000162631 | NTNG1    | netrin G1 [Source intron  | 0.024 | NO  | 9.36  | 8.46  | dow up       | - | no |
| chr1  | 107714376 | 107715625 | ENSG00000162631 | NTNG1    | netrin G1 [Source intron  | 0.034 | NO  | 6.59  | 5.78  | dow up       | - | no |
| chr1  | 107814376 | 107815625 | ENSG00000162631 | NTNG1    | netrin G1 [Source intron  | 0.034 | NO  | 7.09  | 6.19  | dow up       | - | no |
| chr1  | 107842126 | 107843375 | ENSG00000162631 | NTNG1    | netrin G1 [Source intron  | 0.017 | NO  | 7.09  | 5.99  | dow up       | - | no |
| chr1  | 107840376 | 107841625 | ENSG00000162631 | NTNG1    | netrin G1 [Source intron  | 0.040 | NO  | 6.31  | 5.16  | dow up       | - | no |
| chr1  | 107741751 | 107743000 | ENSG00000162631 | NTNG1    | netrin G1 [Source intron  | 0.042 | NO  | 7.30  | 5.37  | dow up       | - | no |
| chr1  | 107705126 | 107706375 | ENSG00000162631 | NTNG1    | netrin G1 [Source intron  | 0.021 | NO  | 6.24  | 4.54  | dow up       | - | no |
| chr1  | 107874626 | 107876000 | ENSG00000162631 | NTNG1    | netrin G1 [Source intron  | 0.003 | NO  | 7.44  | 5.16  | dow up       | - | no |
| chr1  | 107887126 | 107888375 | ENSG00000162631 | NTNG1    | netrin G1 [Source intron  | 0.024 | NO  | 7.59  | 4.54  | dow up       | - | no |
| chr1  | 147241126 | 147242375 | ENSG00000143140 | GJA5     | gap junction prot intron  | 0.045 | NO  | 1.21  | 2.27  | dow up       | - | no |
| chr10 | 47139751  | 47141000  | ENSG00000150165 | ANXA8L1  | annexin A8-like 1 intron  | 0.031 | NO  | 1.06  | 2.06  | dow up       | - | no |
| chr20 | 46373251  | 46374500  | ENSG00000196562 | SULF2    | sulfatase 2 [Sourc intron | 0.029 | NO  | 8.58  | 12.18 | dow up       | - | no |
| chr20 | 46340001  | 46341250  | ENSG00000196562 | SULF2    | sulfatase 2 [Sourc intron | 0.000 | NO  | 14.04 | 16.72 | dow up       | - | no |
| chr4  | 11419626  | 11420875  | ENSG00000002587 | HS3ST1   | heparan sulfate (ξ intron | 0.043 | NO  | 0.78  | 2.27  | dow up       | - | no |
| chr1  | 107675751 | 107677000 | ENSG00000162631 | NTNG1    | netrin G1 [Source upstreā | 0.002 | NO  | 6.17  | 6.19  | dow up       | - | no |
| chr1  | 107673876 | 107675250 | ENSG00000162631 | NTNG1    | netrin G1 [Source upstreā | 0.038 | NO  | 6.66  | 5.57  | dow up       | - | no |
| chr1  | 107678501 | 107679875 | ENSG00000162631 | NTNG1    | netrin G1 [Source upstreā | 0.014 | NO  | 6.38  | 4.75  | dow up       | - | no |
| chr6  | 7389376   | 7390625   | ENSG00000124784 | RIOK1    | RIO kinase 1 [Sou 5UTR    | 0.013 | NO  | 2.69  | 2.89  | dow dow up   | - | no |
| chr4  | 22469376  | 22470625  | ENSG00000152990 | GPR125   | G protein-couplec intron  | 0.006 | YES | 0.50  | 2.06  | dow dow down | - | no |
| chr7  | 43622001  | 43623375  | ENSG00000164543 | STK17A   | serine/threonine 5UTR     | 0.000 | YES | 4.47  | 5.57  | dow dow      | - | no |
| chrX  | 40506126  | 40507625  | ENSG00000185753 | CXorf38  | chromosome X or 5UTR      | 0.000 | YES | 4.47  | 10.94 | dow dow      | - | no |
| chr14 | 75517501  | 75518875  | ENSG00000119684 | MLH3     | mutL homolog 3 (exon      | 0.000 | YES | 3.54  | 4.95  | dow dow      | - | no |
| chr1  | 60279626  | 60281000  | ENSG00000134709 | HOOK1    | hook homolog 1 ( 5UTR     | 0.001 | YES | 1.42  | 3.10  | dow dow      | - | no |
| chr1  | 118475751 | 118477000 | ENSG00000065183 | WDR3     | WD repeat domai 3UTR      | 0.036 | NO  | 0.64  | 2.48  | dow dow      | - | no |
| chr6  | 26271126  | 26272375  | ENSG00000256018 | HIST1H3G | histone cluster 1, 3UTR   | 0.044 | NO  | 3.26  | 2.06  | dow dow      | - | no |
| chr10 | 104473751 | 104475000 | ENSG00000156398 | SFXN2    | sideroflexin 2 [So 5UTR   | 0.013 | NO  | 1.28  | 3.51  | dow dow      | - | no |
| chr12 | 65217751  | 65219000  | ENSG00000111490 | TBC1D30  | TBC1 domain fam 5UTR      | 0.011 | NO  | 2.13  | 3.10  | dow dow      | - | no |
| chr15 | 67546376  | 67547625  | ENSG00000103599 | IQCH     | IQ motif containir 5UTR   | 0.004 | NO  | 2.84  | 3.92  | dow dow      | - | no |
| chr16 | 10479251  | 10480500  | ENSG00000166669 | ATF7IP2  | activating transcri 5UTR  | 0.004 | NO  | 1.84  | 3.10  | dow dow      | - | no |



|       |           |           |                 |           |                           |       |     |       |       |      |      |      |     |
|-------|-----------|-----------|-----------------|-----------|---------------------------|-------|-----|-------|-------|------|------|------|-----|
| chr19 | 30096501  | 30097750  | ENSG00000105171 | POP4      | processing of pre-t5UTR   | 0.022 | NO  | 2.69  | 2.06  | down | down | -    | no  |
| chr1  | 174968126 | 174969500 | ENSG00000116161 | CACYBP    | calcyclin binding p5UTR   | 0.003 | NO  | 4.61  | 5.16  | down | down | -    | no  |
| chr21 | 45660126  | 45661500  | ENSG00000160223 | ICOSLG    | inducible T-cell cc5UTR   | 0.012 | NO  | 2.34  | 5.78  | down | down | -    | no  |
| chr6  | 89855251  | 89856625  | ENSG00000146281 | PM20D2    | peptidase M20 dc5UTR      | 0.001 | NO  | 1.35  | 3.72  | down | down | -    | no  |
| chr7  | 82791626  | 82792875  | ENSG00000186472 | PCLO      | piccolo presynapt5UTR     | 0.030 | NO  | 1.35  | 2.27  | down | down | -    | no  |
| chr9  | 115141626 | 115142875 | ENSG00000119471 | HSDL2     | hydroxysteroid de5UTR     | 0.021 | NO  | 2.27  | 3.72  | down | down | -    | no  |
| chrX  | 14047001  | 14048250  | ENSG00000046647 | GEMIN8    | gem (nuclear org) exon    | 0.002 | NO  | 2.27  | 3.51  | down | down | -    | no  |
| chr1  | 114409376 | 114410625 | ENSG00000134242 | PTPN22    | protein tyrosine p intron | 0.006 | NO  | 2.48  | 4.75  | down | down | -    | no  |
| chr16 | 81635251  | 81636500  | ENSG00000153815 | CMIP      | c-Maf inducing pr intron  | 0.042 | NO  | 1.06  | 2.89  | down | down | -    | no  |
| chr20 | 13322126  | 13323375  | ENSG00000089123 | TASP1     | taspase, threonin intron  | 0.023 | NO  | 1.13  | 3.92  | down | down | -    | no  |
| chr20 | 13322501  | 13323750  | ENSG00000089123 | TASP1     | taspase, threonin intron  | 0.035 | NO  | 0.99  | 3.30  | down | down | -    | no  |
| chr3  | 24330626  | 24331875  | ENSG00000151090 | THRB      | thyroid hormone intron    | 0.028 | NO  | 0.99  | 3.10  | down | down | -    | no  |
| chr3  | 132316626 | 132317875 | ENSG00000240303 | ACAD11    | acyl-CoA dehydro intron   | 0.033 | NO  | 0.78  | 1.86  | down | down | -    | na  |
| chr1  | 33429751  | 33431250  | ENSG00000116514 | RNF19B    | ring finger proteir exon  | 0.000 | YES | 1.42  | 5.78  | down | -    | up   | yes |
| chr8  | 95652501  | 95654000  | ENSG00000104413 | ESRP1     | epithelial splicing 5UTR  | 0.000 | YES | 9.64  | 12.80 | down | -    | up   | no  |
| chr17 | 62971001  | 62972375  | ENSG00000214174 | AMZ2P1    | archaelysin family exon   | 0.006 | YES | 3.33  | 6.61  | down | -    | up   | no  |
| chr20 | 52833626  | 52835250  | ENSG00000101132 | PFDN4     | prefoldin subunit intron  | 0.000 | YES | 13.40 | 17.75 | down | -    | up   | no  |
| chr2  | 232378501 | 232380000 | ENSG00000181798 | LINC00471 | long intergenic nc exon   | 0.000 | YES | 2.84  | 5.57  | down | -    | up   | no  |
| chr5  | 72251001  | 72252375  | ENSG00000157107 | FCHO2     | FCH domain only 5UTR      | 0.002 | NO  | 1.84  | 5.16  | down | -    | up   | no  |
| chr2  | 38303251  | 38304500  | ENSG00000138061 | CYP1B1    | cytochrome P450 exon      | 0.041 | NO  | 2.69  | 6.19  | down | -    | up   | no  |
| chr20 | 52841751  | 52843250  | ENSG00000101132 | PFDN4     | prefoldin subunit intron  | 0.012 | NO  | 8.15  | 10.94 | down | -    | up   | no  |
| chr6  | 53412376  | 53413625  | ENSG00000001084 | GCLC      | glutamate-cysteir intron  | 0.025 | NO  | 1.35  | 3.30  | down | -    | up   | no  |
| chr1  | 203273876 | 203275250 | ENSG00000159388 | BTG2      | BTG family, meml5UTR      | 0.001 | YES | 2.27  | 5.99  | down | -    | down | no  |
| chr12 | 56473376  | 56474750  | ENSG00000065361 | ERBB3     | v-erb-b2 erythro5UTR      | 0.028 | NO  | 1.98  | 3.92  | down | -    | down | no  |
| chr3  | 142314501 | 142315750 | ENSG00000120756 | PLS1      | plastin 1 [Source:5UTR    | 0.008 | NO  | 2.06  | 4.13  | down | -    | down | no  |
| chr3  | 113674751 | 113676000 | ENSG00000184307 | ZDHHC23   | zinc finger, DHHC-exon    | 0.024 | NO  | 0.78  | 2.48  | down | -    | down | no  |
| chr1  | 109782376 | 109783625 | ENSG00000143126 | CELSR2    | cadherin, EGF LA) upstre  | 0.024 | NO  | 2.69  | 4.95  | down | -    | down | no  |
| chr8  | 128747751 | 128749250 | ENSG00000136997 | MYC       | v-myc myelocytor5UTR      | 0.000 | YES | 5.60  | 11.56 | down | -    | -    | yes |
| chr20 | 43976376  | 43977750  | ENSG00000124145 | SDC4      | syndecan 4 [Sour5UTR      | 0.003 | YES | 2.91  | 4.13  | down | -    | -    | yes |
| chr1  | 154377126 | 154378375 | ENSG00000160712 | IL6R      | interleukin 6 rece5UTR    | 0.049 | NO  | 2.13  | 4.34  | down | -    | -    | yes |
| chr1  | 154377876 | 154379125 | ENSG00000160712 | IL6R      | interleukin 6 rece5UTR    | 0.008 | NO  | 2.34  | 4.13  | down | -    | -    | yes |

|       |           |           |                 |          |                            |       |     |       |       |      |   |     |
|-------|-----------|-----------|-----------------|----------|----------------------------|-------|-----|-------|-------|------|---|-----|
| chr19 | 39896751  | 39898250  | ENSG00000128016 | ZFP36    | ZFP36 ring finger 5UTR     | 0.000 | NO  | 1.56  | 4.34  | dow- | - | yes |
| chr3  | 32515251  | 32516500  | ENSG00000153551 | CMTM7    | CKLF-like MARVEL intron    | 0.006 | YES | 0.92  | 3.10  | dow- | - | no  |
| chr3  | 186500751 | 186502000 | ENSG00000156976 | EIF4A2   | eukaryotic transl 5UTR     | 0.000 | YES | 4.89  | 6.61  | dow- | - | no  |
| chr3  | 193853251 | 193854750 | ENSG00000114315 | HES1     | hairy and enhanc 5UTR      | 0.000 | YES | 10.70 | 12.80 | dow- | - | no  |
| chr3  | 193856501 | 193858000 | ENSG00000114315 | HES1     | hairy and enhanc 3UTR      | 0.000 | YES | 9.22  | 10.53 | dow- | - | no  |
| chr4  | 81008751  | 81010000  | ENSG00000163297 | ANTXR2   | anthrax toxin rece intron  | 0.042 | YES | 0.57  | 2.68  | dow- | - | no  |
| chr5  | 57755126  | 57756750  | ENSG00000145632 | PLK2     | polo-like kinase 2 5UTR    | 0.000 | YES | 4.75  | 11.15 | dow- | - | no  |
| chrX  | 7065501   | 7067000   | ENSG00000130021 | HDHD1    | haloacid dehaloge 5UTR     | 0.000 | YES | 1.56  | 6.19  | dow- | - | no  |
| chr9  | 139685001 | 139686750 | ENSG00000244187 | TMEM141  | transmembrane p 5UTR       | 0.000 | YES | 4.54  | 12.59 | dow- | - | no  |
| chr13 | 27998001  | 27999375  | ENSG00000122034 | GTF3A    | general transcript 5UTR    | 0.000 | YES | 7.94  | 11.77 | dow- | - | no  |
| chr14 | 24036126  | 24037500  | ENSG00000213983 | AP1G2    | adaptor-related p 5UTR     | 0.000 | YES | 1.84  | 4.34  | dow- | - | no  |
| chr14 | 50359001  | 50360500  | ENSG00000165527 | ARF6     | ADP-ribosylation 5UTR      | 0.000 | YES | 3.12  | 5.78  | dow- | - | no  |
| chr14 | 61822376  | 61823625  | ENSG00000027075 | PRKCH    | protein kinase C, i intron | 0.009 | YES | 0.64  | 2.27  | dow- | - | no  |
| chr14 | 102770876 | 102772250 | ENSG00000080823 | MOK      | MOK protein kina 5UTR      | 0.000 | YES | 3.47  | 7.02  | dow- | - | no  |
| chr16 | 68770501  | 68772000  | ENSG00000039068 | CDH1     | cadherin 1, type 1 5UTR    | 0.000 | YES | 2.76  | 5.78  | dow- | - | no  |
| chr17 | 80277626  | 80279000  | ENSG00000141574 | SECTM1   | secreted and tran 3UTR     | 0.002 | YES | 1.56  | 3.10  | dow- | - | no  |
| chr18 | 12883501  | 12884875  | ENSG00000175354 | PTPN2    | protein tyrosine p 5UTR    | 0.000 | YES | 2.06  | 5.57  | dow- | - | no  |
| chr1  | 150601501 | 150602875 | ENSG00000143420 | ENSA     | endosulfine alpha 5UTR     | 0.000 | YES | 4.75  | 6.40  | dow- | - | no  |
| chr19 | 34894501  | 34896000  | ENSG00000126249 | PDCD2L   | programmed cell 5UTR       | 0.000 | YES | 1.28  | 4.13  | dow- | - | no  |
| chr11 | 67079751  | 67081000  | ENSG00000172830 | SSH3     | slingshot protein 3UTR     | 0.004 | NO  | 1.49  | 3.10  | dow- | - | no  |
| chr11 | 72532501  | 72534000  | ENSG00000168010 | ATG16L2  | autophagy relate 3UTR      | 0.000 | NO  | 2.34  | 5.78  | dow- | - | no  |
| chr20 | 49372751  | 49374125  | ENSG00000124171 | PARD6B   | par-6 partitioning 3UTR    | 0.020 | NO  | 8.86  | 7.23  | dow- | - | no  |
| chr20 | 49368001  | 49369625  | ENSG00000124171 | PARD6B   | par-6 partitioning 3UTR    | 0.018 | NO  | 11.63 | 8.46  | dow- | - | no  |
| chr4  | 46369376  | 46370625  | ENSG00000151834 | GABRA2   | gamma-aminobut 3UTR        | 0.005 | NO  | 0.21  | 2.48  | dow- | - | no  |
| chr6  | 106557626 | 106558875 | ENSG00000057657 | PRDM1    | PR domain contai 3UTR      | 0.002 | NO  | 1.28  | 2.48  | dow- | - | no  |
| chr1  | 145437751 | 145439125 | ENSG00000117289 | TXNIP    | thioredoxin inter 5UTR     | 0.000 | NO  | 3.69  | 5.37  | dow- | - | no  |
| chr1  | 207225876 | 207227250 | ENSG00000123836 | PFKFB2   | 6-phosphofructo- 5UTR      | 0.014 | NO  | 1.49  | 3.51  | dow- | - | no  |
| chr11 | 66511876  | 66513125  | ENSG00000173715 | C11orf80 | chromosome 11 c 5UTR       | 0.013 | NO  | 1.56  | 3.72  | dow- | - | no  |
| chr11 | 6632501   | 6633750   | ENSG00000166337 | TAF10    | TAF10 RNA polym 5UTR       | 0.047 | NO  | 0.50  | 2.89  | dow- | - | no  |
| chr13 | 28194251  | 28195500  | ENSG00000186184 | POLR1D   | polymerase (RNA 5UTR       | 0.014 | NO  | 2.98  | 6.19  | dow- | - | no  |
| chr14 | 20936876  | 20938250  | ENSG00000198805 | PNP      | purine nucleoside 5UTR     | 0.002 | NO  | 1.84  | 3.10  | dow- | - | no  |

|       |           |           |                 |          |                     |        |       |    |       |       |     |   |    |
|-------|-----------|-----------|-----------------|----------|---------------------|--------|-------|----|-------|-------|-----|---|----|
| chr14 | 70077126  | 70078375  | ENSG00000100647 | KIAA0247 | KIAA0247 [Source    | 5UTR   | 0.023 | NO | 1.70  | 2.68  | dow | - | no |
| chr14 | 24740126  | 24741500  | ENSG00000100949 | RABGGTA  | Rab geranylgeran    | 5UTR   | 0.000 | NO | 3.33  | 3.72  | dow | - | no |
| chr15 | 69112751  | 69114000  | ENSG00000140350 | ANP32A   | acidic (leucine-ric | 5UTR   | 0.002 | NO | 1.13  | 3.10  | dow | - | no |
| chr15 | 77223251  | 77224500  | ENSG00000117906 | RCN2     | reticulocalbin 2, E | 5UTR   | 0.020 | NO | 1.21  | 3.51  | dow | - | no |
| chr19 | 33071501  | 33072750  | ENSG00000105185 | PDCD5    | programmed cell     | 5UTR   | 0.000 | NO | 1.84  | 3.51  | dow | - | no |
| chr20 | 18487876  | 18489250  | ENSG00000101310 | SEC23B   | Sec23 homolog B     | 5UTR   | 0.001 | NO | 3.26  | 4.54  | dow | - | no |
| chr20 | 18487501  | 18488750  | ENSG00000101310 | SEC23B   | Sec23 homolog B     | 5UTR   | 0.025 | NO | 3.12  | 4.34  | dow | - | no |
| chr4  | 141294001 | 141295375 | ENSG00000153130 | SCOC     | short coiled-coil p | 5UTR   | 0.000 | NO | 2.27  | 3.10  | dow | - | no |
| chr5  | 10249626  | 10251000  | ENSG00000150753 | CCT5     | chaperonin conta    | 5UTR   | 0.001 | NO | 5.67  | 6.40  | dow | - | no |
| chr1  | 10856126  | 10857375  | ENSG00000130940 | CASZ1    | castor zinc finger  | exon   | 0.039 | NO | 1.06  | 2.89  | dow | - | no |
| chr1  | 209957251 | 209958500 | ENSG00000162757 | C1orf74  | chromosome 1 or     | exon   | 0.018 | NO | 1.42  | 3.10  | dow | - | no |
| chr11 | 72504126  | 72505500  | ENSG00000214530 | STARD10  | StAR-related lipid  | exon   | 0.000 | NO | 2.48  | 4.75  | dow | - | no |
| chr14 | 73924626  | 73926125  | ENSG00000133961 | NUMB     | numb homolog (L     | exon   | 0.000 | NO | 3.26  | 4.54  | dow | - | no |
| chr20 | 16354126  | 16355375  | ENSG00000089177 | KIF16B   | kinesin family me   | exon   | 0.017 | NO | 0.78  | 3.30  | dow | - | no |
| chr20 | 16354626  | 16355875  | ENSG00000089177 | KIF16B   | kinesin family me   | exon   | 0.016 | NO | 0.92  | 3.51  | dow | - | no |
| chr20 | 52773876  | 52775500  | ENSG00000019186 | CYP24A1  | cytochrome P450     | exon   | 0.001 | NO | 18.64 | 20.44 | dow | - | no |
| chr22 | 31686126  | 31687625  | ENSG00000100100 | PIK3IP1  | phosphoinositide    | exon   | 0.000 | NO | 1.49  | 4.13  | dow | - | no |
| chr3  | 193854251 | 193856000 | ENSG00000114315 | HES1     | hairy and enhanc    | exon   | 0.006 | NO | 11.34 | 11.77 | dow | - | no |
| chr3  | 128902001 | 128903500 | ENSG00000169714 | CNBP     | CCHC-type zinc fir  | exon   | 0.001 | NO | 2.20  | 5.78  | dow | - | no |
| chr1  | 181006501 | 181007750 | ENSG00000153029 | MR1      | major histocomp     | intron | 0.023 | NO | 1.42  | 3.10  | dow | - | no |
| chr13 | 42657501  | 42658750  | ENSG00000102780 | DGKH     | diacylglycerol kin  | intron | 0.047 | NO | 1.63  | 3.51  | dow | - | no |
| chr15 | 49930001  | 49931250  | ENSG00000104047 | DTWD1    | DTW domain con      | intron | 0.016 | NO | 1.84  | 2.68  | dow | - | no |
| chr20 | 49349876  | 49351250  | ENSG00000124171 | PARD6B   | par-6 partitioning  | intron | 0.025 | NO | 9.07  | 8.05  | dow | - | no |
| chr20 | 49351376  | 49352625  | ENSG00000124171 | PARD6B   | par-6 partitioning  | intron | 0.048 | NO | 9.57  | 7.43  | dow | - | no |
| chr20 | 49359501  | 49360750  | ENSG00000124171 | PARD6B   | par-6 partitioning  | intron | 0.005 | NO | 10.92 | 8.46  | dow | - | no |
| chr20 | 52771751  | 52773125  | ENSG00000019186 | CYP24A1  | cytochrome P450     | intron | 0.019 | NO | 9.71  | 9.08  | dow | - | no |
| chr6  | 136670876 | 136672125 | ENSG00000135525 | MAP7     | microtubule-asso    | intron | 0.011 | NO | 0.07  | 2.27  | dow | - | no |
| chr8  | 102505376 | 102506750 | ENSG00000083307 | GRHL2    | grainyhead-like 2   | intron | 0.000 | NO | 4.11  | 6.81  | dow | - | no |
| chr20 | 52797876  | 52799250  | ENSG00000019186 | CYP24A1  | cytochrome P450     | upstre | 0.001 | NO | 13.47 | 16.93 | dow | - | no |
| chr20 | 52792626  | 52793875  | ENSG00000019186 | CYP24A1  | cytochrome P450     | upstre | 0.048 | NO | 9.50  | 10.94 | dow | - | no |
| chr3  | 193852251 | 193853500 | ENSG00000114315 | HES1     | hairy and enhanc    | upstre | 0.014 | NO | 4.32  | 5.37  | dow | - | no |

|       |           |           |                 |          |                           |       |     |       |       |      |    |      |     |
|-------|-----------|-----------|-----------------|----------|---------------------------|-------|-----|-------|-------|------|----|------|-----|
| chr22 | 50963376  | 50964750  | ENSG00000025708 | TYMP     | thymidine phosph 3UTR     | 0.000 | NO  | 2.20  | 3.51  | down | -  | -    | na  |
| chr2  | 70141376  | 70142875  | ENSG00000059728 | MXD1     | MAX dimerization 5UTR     | 0.000 | YES | 2.76  | 7.23  | -    | up | up   | yes |
| chr20 | 48807001  | 48808250  | ENSG00000172216 | CEBPB    | CCAAT/enhancer 5UTR       | 0.011 | NO  | 1.77  | 5.99  | -    | up | up   | yes |
| chr17 | 62159126  | 62160375  | ENSG00000178607 | ERN1     | endoplasmic retic intron  | 0.047 | NO  | 1.98  | 3.30  | -    | up | up   | yes |
| chr19 | 44172501  | 44173750  | ENSG00000011422 | PLAUR    | plasminogen activ intron  | 0.009 | NO  | 0.85  | 2.48  | -    | up | up   | yes |
| chr1  | 68150251  | 68151625  | ENSG00000116717 | GADD45A  | growth arrest anc 5UTR    | 0.000 | YES | 1.77  | 4.75  | -    | up | up   | no  |
| chr3  | 156877501 | 156878750 | ENSG00000163660 | CCNL1    | cyclin L1 [Source:  5UTR  | 0.000 | YES | 4.61  | 7.43  | -    | up | up   | no  |
| chr17 | 58368626  | 58369875  | ENSG00000170832 | USP32    | ubiquitin specific intron | 0.007 | YES | 9.07  | 12.18 | -    | up | up   | no  |
| chr2  | 86667251  | 86668625  | ENSG00000115548 | KDM3A    | lysine (K)-specific 5UTR  | 0.000 | YES | 4.18  | 7.43  | -    | up | up   | no  |
| chr2  | 86667751  | 86669125  | ENSG00000115548 | KDM3A    | lysine (K)-specific 5UTR  | 0.008 | YES | 3.97  | 7.64  | -    | up | up   | no  |
| chr17 | 58497626  | 58499000  | ENSG00000170832 | USP32    | ubiquitin specific 3UTR   | 0.005 | NO  | 7.23  | 9.70  | -    | up | up   | no  |
| chr22 | 38338876  | 38340125  | ENSG00000128346 | C22orf23 | chromosome 22 c 3UTR      | 0.040 | NO  | 1.06  | 2.48  | -    | up | up   | no  |
| chr1  | 85741751  | 85743000  | ENSG00000142867 | BCL10    | B-cell CLL/lymphc 5UTR    | 0.011 | NO  | 2.41  | 4.95  | -    | up | up   | no  |
| chr8  | 53626501  | 53627750  | ENSG00000023287 | RB1CC1   | RB1-inducible coil 5UTR   | 0.001 | NO  | 1.63  | 3.10  | -    | up | up   | no  |
| chr17 | 58312251  | 58313625  | ENSG00000170832 | USP32    | ubiquitin specific exon   | 0.003 | NO  | 10.49 | 13.01 | -    | up | up   | no  |
| chr17 | 58339376  | 58340625  | ENSG00000170832 | USP32    | ubiquitin specific intron | 0.038 | NO  | 6.52  | 7.84  | -    | up | up   | no  |
| chr17 | 58357376  | 58358625  | ENSG00000170832 | USP32    | ubiquitin specific intron | 0.032 | NO  | 6.81  | 6.81  | -    | up | up   | no  |
| chr17 | 58398126  | 58399375  | ENSG00000170832 | USP32    | ubiquitin specific intron | 0.034 | NO  | 9.64  | 9.50  | -    | up | up   | no  |
| chr17 | 58464251  | 58465500  | ENSG00000170832 | USP32    | ubiquitin specific intron | 0.014 | NO  | 8.44  | 7.64  | -    | up | up   | no  |
| chr17 | 58464876  | 58466125  | ENSG00000170832 | USP32    | ubiquitin specific intron | 0.042 | NO  | 9.15  | 8.05  | -    | up | up   | no  |
| chr17 | 58462751  | 58464000  | ENSG00000170832 | USP32    | ubiquitin specific intron | 0.041 | NO  | 6.95  | 5.57  | -    | up | up   | no  |
| chr1  | 180125501 | 180126750 | ENSG00000116260 | QSOX1    | quiescin Q6 sulfhy intron | 0.021 | NO  | 1.49  | 3.51  | -    | up | down | yes |
| chr3  | 175053751 | 175055000 | ENSG00000177694 | NAALADL2 | N-acetylated alph intron  | 0.001 | YES | 1.35  | 4.54  | -    | up | down | no  |
| chr6  | 44094501  | 44095875  | ENSG00000137216 | TMEM63E  | transmembrane p 5UTR      | 0.000 | YES | 1.84  | 6.61  | -    | up | down | no  |
| chr16 | 88728876  | 88730375  | ENSG00000167508 | MVD      | mevalonate (diph 5UTR     | 0.000 | YES | 3.47  | 5.16  | -    | up | down | no  |
| chr1  | 228290376 | 228291750 | ENSG00000143793 | C1orf35  | chromosome 1 o 5UTR       | 0.000 | YES | 1.63  | 3.92  | -    | up | down | no  |
| chr19 | 59065751  | 59067125  | ENSG00000130725 | UBE2M    | ubiquitin-conjugat 3UTR   | 0.000 | YES | 3.05  | 3.51  | -    | up | down | no  |
| chr20 | 34129126  | 34130375  | ENSG00000125991 | ERGIC3   | ERGIC and golgi 3 5UTR    | 0.023 | NO  | 1.91  | 3.30  | -    | up | down | no  |
| chr9  | 131939751 | 131941250 | ENSG00000188483 | IER5L    | immediate early r 5UTR    | 0.000 | YES | 3.47  | 6.81  | -    | up | -    | yes |
| chr15 | 89461626  | 89463000  | ENSG00000140545 | MFG8     | milk fat globule-E upstre | 0.000 | YES | 1.35  | 7.84  | -    | up | -    | yes |
| chr20 | 35579376  | 35580875  | ENSG00000101347 | SAMHD1   | SAM domain and 5UTR       | 0.000 | YES | 4.32  | 9.70  | -    | up | -    | yes |

|       |           |           |                 |            |                          |       |     |      |       |   |    |   |     |
|-------|-----------|-----------|-----------------|------------|--------------------------|-------|-----|------|-------|---|----|---|-----|
| chr1  | 181057001 | 181058625 | ENSG00000162783 | IER5       | immediate early r 5UTR   | 0.000 | YES | 7.66 | 12.80 | - | up | - | yes |
| chr1  | 234745251 | 234746625 | ENSG00000168264 | IRF2BP2    | interferon regulat 5UTR  | 0.000 | YES | 2.06 | 3.92  | - | up | - | yes |
| chr2  | 192542126 | 192543625 | ENSG00000173559 | NABP1      | nucleic acid bindi 5UTR  | 0.000 | YES | 1.49 | 5.16  | - | up | - | yes |
| chr12 | 52563751  | 52565000  | ENSG00000167767 | KRT80      | keratin 80 [Source: 3UTR | 0.001 | NO  | 1.21 | 5.99  | - | up | - | yes |
| chr1  | 28585251  | 28586625  | ENSG00000130766 | SESN2      | sestrin 2 [Source: 5UTR  | 0.016 | NO  | 1.63 | 3.51  | - | up | - | yes |
| chr10 | 3827001   | 3828375   | ENSG00000067082 | KLF6       | Kruppel-like facto 5UTR  | 0.000 | NO  | 5.74 | 6.40  | - | up | - | yes |
| chr14 | 69259126  | 69260375  | ENSG00000185650 | ZFP36L1    | ZFP36 ring finger 5UTR   | 0.001 | NO  | 2.91 | 4.34  | - | up | - | yes |
| chr19 | 50706126  | 50707500  | ENSG00000105357 | MYH14      | myosin, heavy ch: 5UTR   | 0.001 | NO  | 1.98 | 4.13  | - | up | - | yes |
| chr6  | 21593251  | 21594625  | ENSG00000124766 | SOX4       | SRY (sex determin 5UTR   | 0.001 | NO  | 1.42 | 4.34  | - | up | - | yes |
| chr8  | 126441876 | 126443250 | ENSG00000173334 | TRIB1      | tribbles homolog 5UTR    | 0.000 | NO  | 5.03 | 8.46  | - | up | - | yes |
| chr6  | 30711751  | 30713000  | ENSG00000137331 | IER3       | immediate early r 5UTR   | 0.002 | NO  | 3.26 | 3.30  | - | up | - | yes |
| chr1  | 204171001 | 204172250 | ENSG00000174567 | GOLT1A     | golgi transport 1A exon  | 0.040 | NO  | 0.85 | 2.48  | - | up | - | yes |
| chr19 | 13928376  | 13929625  | ENSG00000132003 | ZSWIM4     | zinc finger, SWIM exon   | 0.044 | NO  | 0.28 | 1.45  | - | up | - | yes |
| chr16 | 84644251  | 84645500  | ENSG00000103187 | COTL1      | coactosin-like 1 (intron | 0.038 | NO  | 1.91 | 4.13  | - | up | - | yes |
| chr3  | 9437751   | 9439250   | ENSG00000206573 | SETD5-AS1  | SETD5 antisense 1 exon   | 0.008 | YES | 6.73 | 13.01 | - | up | - | no  |
| chr3  | 42530251  | 42531500  | ENSG00000114812 | VIPR1      | vasoactive intesti 5UTR  | 0.003 | YES | 0.71 | 3.72  | - | up | - | no  |
| chr3  | 50927001  | 50928375  | ENSG00000088538 | DOCK3      | dedicator of cytol exon  | 0.029 | YES | 0.28 | 1.45  | - | up | - | no  |
| chr1  | 16301876  | 16303375  | ENSG00000116809 | ZBTB17     | zinc finger and BT exon  | 0.000 | YES | 4.11 | 7.23  | - | up | - | no  |
| chr4  | 6674876   | 6676375   | ENSG00000170846 | AC093323.3 | exon                     | 0.000 | YES | 2.48 | 4.95  | - | up | - | no  |
| chr5  | 1799251   | 1800750   | ENSG00000171421 | MRPL36     | mitochondrial rib exon   | 0.000 | YES | 2.48 | 5.99  | - | up | - | no  |
| chr5  | 179285126 | 179286625 | ENSG00000161010 | C5orf45    | chromosome 5 or 5UTR     | 0.000 | YES | 2.62 | 6.40  | - | up | - | no  |
| chr6  | 112089126 | 112090500 | ENSG00000010810 | FYN        | FYN oncogene rel intron  | 0.000 | YES | 1.70 | 3.30  | - | up | - | no  |
| chr7  | 106808751 | 106810125 | ENSG00000105856 | HBP1       | HMG-box transcri 5UTR    | 0.001 | YES | 2.98 | 7.64  | - | up | - | no  |
| chr7  | 150075501 | 150077000 | ENSG00000196456 | ZNF775     | zinc finger proteir 5UTR | 0.000 | YES | 2.62 | 7.23  | - | up | - | no  |
| chrX  | 152864126 | 152865500 | ENSG00000147382 | FAM58A     | family with seque 5UTR   | 0.000 | YES | 2.34 | 4.95  | - | up | - | no  |
| chr9  | 110044751 | 110046125 | ENSG00000119318 | RAD23B     | RAD23 homolog E 5UTR     | 0.000 | YES | 3.69 | 4.75  | - | up | - | no  |
| chr9  | 139980626 | 139982000 | ENSG00000177239 | MAN1B1     | mannosidase, alp 5UTR    | 0.000 | YES | 2.91 | 6.61  | - | up | - | no  |
| chr10 | 5487751   | 5489250   | ENSG00000173848 | NET1       | neuroepithelial ce 5UTR  | 0.000 | YES | 2.98 | 5.78  | - | up | - | no  |
| chr10 | 126847001 | 126848375 | ENSG00000175029 | CTBP2      | C-terminal bindin exon   | 0.016 | YES | 1.35 | 4.34  | - | up | - | no  |
| chr11 | 560126    | 561500    | ENSG00000099849 | RASSF7     | Ras association (R 5UTR  | 0.000 | YES | 1.35 | 2.89  | - | up | - | no  |
| chr11 | 1330126   | 1331750   | ENSG00000078902 | TOLLIP     | toll interacting pr 5UTR | 0.000 | YES | 2.98 | 8.05  | - | up | - | no  |

|       |           |           |                 |          |                     |        |       |     |       |       |   |    |   |    |
|-------|-----------|-----------|-----------------|----------|---------------------|--------|-------|-----|-------|-------|---|----|---|----|
| chr11 | 65265751  | 65267375  | ENSG00000251562 | MALAT1   | metastasis associ   | exon   | 0.000 | YES | 6.24  | 10.94 | - | up | - | no |
| chr12 | 113658501 | 113660000 | ENSG00000186815 | TPCN1    | two pore segmen     | 5UTR   | 0.000 | YES | 3.90  | 5.16  | - | up | - | no |
| chr14 | 65878626  | 65880125  | ENSG00000033170 | FUT8     | fucosyltransferas   | 5UTR   | 0.000 | YES | 5.10  | 9.70  | - | up | - | no |
| chr15 | 62352001  | 62353375  | ENSG00000129003 | VPS13C   | vacuolar protein s  | 5UTR   | 0.000 | YES | 1.42  | 2.89  | - | up | - | no |
| chr15 | 79602751  | 79604125  | ENSG00000166557 | TMED3    | transmembrane e     | 5UTR   | 0.000 | YES | 2.27  | 6.40  | - | up | - | no |
| chr16 | 2954751   | 2956625   | ENSG00000059122 | FLYWCH1  | FLYWCH-type zinc    | upstre | 0.000 | YES | 3.83  | 9.08  | - | up | - | no |
| chr16 | 4742876   | 4744250   | ENSG00000168101 | NUDT16L1 | nudix (nucleoside   | 5UTR   | 0.000 | YES | 2.98  | 5.57  | - | up | - | no |
| chr16 | 30545751  | 30547125  | ENSG00000169955 | ZNF747   | zinc finger proteir | 5UTR   | 0.000 | YES | 1.56  | 3.92  | - | up | - | no |
| chr16 | 70285126  | 70286625  | ENSG00000223496 | EXOSC6   | exosome compon      | 5UTR   | 0.000 | YES | 3.83  | 5.57  | - | up | - | no |
| chr16 | 71928751  | 71930125  | ENSG00000182149 | IST1     | increased sodium    | 5UTR   | 0.000 | YES | 3.90  | 7.43  | - | up | - | no |
| chr16 | 84025626  | 84027000  | ENSG00000103154 | NECAB2   | N-terminal EF-har   | intron | 0.002 | YES | 1.28  | 4.34  | - | up | - | no |
| chr16 | 87984126  | 87985625  | ENSG00000172530 | BANP     | BTG3 associated r   | 5UTR   | 0.000 | YES | 5.74  | 7.64  | - | up | - | no |
| chr1  | 109755876 | 109757250 | ENSG00000031698 | SARS     | seryl-tRNA synthe   | 5UTR   | 0.000 | YES | 4.18  | 9.29  | - | up | - | no |
| chr1  | 109756376 | 109757625 | ENSG00000031698 | SARS     | seryl-tRNA synthe   | 5UTR   | 0.012 | YES | 3.83  | 8.46  | - | up | - | no |
| chr1  | 149857626 | 149859125 | ENSG00000184678 | HIST2H2B | histone cluster 2,  | 5UTR   | 0.000 | YES | 12.26 | 8.67  | - | up | - | no |
| chr1  | 149858376 | 149860250 | ENSG00000178096 | BOLA1    | bolA homolog 1 (l   | 5UTR   | 0.000 | YES | 13.61 | 13.62 | - | up | - | no |
| chr20 | 25175501  | 25177000  | ENSG00000197586 | ENTPD6   | ectonucleoside tr   | 5UTR   | 0.000 | YES | 9.64  | 17.96 | - | up | - | no |
| chr1  | 160067876 | 160069375 | ENSG00000162729 | IGSF8    | immunoglobulin s    | 5UTR   | 0.000 | YES | 2.48  | 4.95  | - | up | - | no |
| chr1  | 197169876 | 197171375 | ENSG00000134376 | CRB1     | crumbs homolog      | 5UTR   | 0.000 | YES | 2.55  | 6.61  | - | up | - | no |
| chr1  | 226069376 | 226070750 | ENSG00000196187 | TMEM63A  | transmembrane p     | exon   | 0.000 | YES | 2.20  | 4.34  | - | up | - | no |
| chr1  | 46597626  | 46599000  | ENSG00000117461 | PIK3R3   | phosphoinositide    | 5UTR   | 0.000 | YES | 2.62  | 6.19  | - | up | - | no |
| chr2  | 101924501 | 101925875 | ENSG00000163162 | RNF149   | ring finger proteir | 5UTR   | 0.000 | YES | 3.47  | 8.05  | - | up | - | no |
| chr19 | 1039376   | 1040750   | ENSG00000064687 | ABCA7    | ATP-binding casse   | 5UTR   | 0.000 | YES | 2.20  | 3.30  | - | up | - | no |
| chr19 | 2050626   | 2052000   | ENSG00000099875 | MKNK2    | MAP kinase inter    | 5UTR   | 0.000 | YES | 1.42  | 3.92  | - | up | - | no |
| chr19 | 7459376   | 7460750   | ENSG00000104880 | ARHGEF18 | Rho/Rac guanine     | 5UTR   | 0.000 | YES | 0.85  | 3.92  | - | up | - | no |
| chr19 | 33667126  | 33668625  | ENSG00000130881 | LRP3     | low density lipopr  | 5UTR   | 0.000 | YES | 3.83  | 6.40  | - | up | - | no |
| chr19 | 42721126  | 42722750  | ENSG00000160570 | DEDD2    | death effector do   | 5UTR   | 0.000 | YES | 3.40  | 7.02  | - | up | - | no |
| chr19 | 42771876  | 42773125  | ENSG00000079432 | CIC      | capicua transcript  | 5UTR   | 0.001 | YES | 3.97  | 7.23  | - | up | - | no |
| chr19 | 42772376  | 42774000  | ENSG00000079432 | CIC      | capicua transcript  | 5UTR   | 0.000 | YES | 5.46  | 10.12 | - | up | - | no |
| chr19 | 50979001  | 50980500  | ENSG00000142530 | FAM71E1  | family with seque   | 5UTR   | 0.000 | YES | 2.34  | 5.57  | - | up | - | no |
| chr19 | 56135126  | 56136500  | ENSG00000179922 | ZNF784   | zinc finger proteir | 5UTR   | 0.000 | YES | 1.42  | 3.51  | - | up | - | no |

|       |           |           |                 |          |                          |       |    |      |      |   |    |   |    |
|-------|-----------|-----------|-----------------|----------|--------------------------|-------|----|------|------|---|----|---|----|
| chr19 | 50372376  | 50373625  | ENSG00000204673 | AKT1S1   | AKT1 substrate 1 3UTR    | 0.005 | NO | 1.70 | 2.68 | - | up | - | no |
| chr20 | 52183126  | 52184375  | ENSG00000171940 | ZNF217   | zinc finger proteir 3UTR | 0.017 | NO | 6.10 | 6.19 | - | up | - | no |
| chr1  | 26559876  | 26561125  | ENSG00000130695 | CEP85    | centrosomal prot 5UTR    | 0.039 | NO | 1.98 | 3.10 | - | up | - | no |
| chr1  | 201797626 | 201798875 | ENSG00000198700 | IPO9     | importin 9 [Sourc 5UTR   | 0.008 | NO | 0.85 | 2.48 | - | up | - | no |
| chr1  | 115167876 | 115169125 | ENSG00000175984 | DENND2C  | DENN/MADD don 5UTR       | 0.011 | NO | 5.25 | 5.78 | - | up | - | no |
| chr11 | 45939001  | 45940250  | ENSG00000121680 | PEX16    | peroxisomal biogr 5UTR   | 0.001 | NO | 2.62 | 3.72 | - | up | - | no |
| chr11 | 61734501  | 61736000  | ENSG00000167996 | FTH1     | ferritin, heavy pol 5UTR | 0.031 | NO | 2.48 | 4.13 | - | up | - | no |
| chr11 | 67236126  | 67237500  | ENSG00000172663 | TMEM134  | transmembrane Ꞥ 5UTR     | 0.000 | NO | 1.28 | 4.95 | - | up | - | no |
| chr11 | 67235626  | 67237000  | ENSG00000172663 | TMEM134  | transmembrane Ꞥ 5UTR     | 0.003 | NO | 1.77 | 5.99 | - | up | - | no |
| chr13 | 111566751 | 111568000 | ENSG00000088448 | ANKRD10  | ankyrin repeat do 5UTR   | 0.019 | NO | 0.64 | 2.27 | - | up | - | no |
| chr14 | 65878001  | 65879250  | ENSG00000033170 | FUT8     | fucosyltransferas 5UTR   | 0.005 | NO | 2.91 | 4.95 | - | up | - | no |
| chr14 | 105780126 | 105781375 | ENSG00000179364 | PACS2    | phosphofurin acic 5UTR   | 0.018 | NO | 1.06 | 2.89 | - | up | - | no |
| chr15 | 85923126  | 85924500  | ENSG00000170776 | AKAP13   | A kinase (PRKA) a 5UTR   | 0.008 | NO | 0.92 | 2.68 | - | up | - | no |
| chr16 | 770376    | 771750    | ENSG00000103254 | FAM173A  | family with seque 5UTR   | 0.000 | NO | 3.40 | 7.84 | - | up | - | no |
| chr16 | 2961126   | 2962500   | ENSG00000059122 | FLYWCH1  | FLYWCH-type zinc 5UTR    | 0.003 | NO | 2.20 | 3.92 | - | up | - | no |
| chr16 | 4783626   | 4785000   | ENSG00000166246 | C16orf71 | chromosome 16 c 5UTR     | 0.002 | NO | 2.76 | 3.30 | - | up | - | no |
| chr16 | 30075751  | 30077125  | ENSG00000149925 | ALDOA    | aldolase A, fructo 5UTR  | 0.011 | NO | 3.26 | 4.95 | - | up | - | no |
| chr16 | 30076376  | 30077625  | ENSG00000149925 | ALDOA    | aldolase A, fructo 5UTR  | 0.018 | NO | 3.62 | 4.75 | - | up | - | no |
| chr16 | 67693626  | 67694875  | ENSG00000102981 | PARD6A   | par-6 partitioning 5UTR  | 0.031 | NO | 3.40 | 4.13 | - | up | - | no |
| chr18 | 3448751   | 3450000   | ENSG00000177426 | TGIF1    | TGFB-induced fac 5UTR    | 0.018 | NO | 1.56 | 6.40 | - | up | - | no |
| chr18 | 3449751   | 3451125   | ENSG00000177426 | TGIF1    | TGFB-induced fac 5UTR    | 0.000 | NO | 1.98 | 7.02 | - | up | - | no |
| chr19 | 46195251  | 46196500  | ENSG00000011478 | QPCTL    | glutaminy-peptid 5UTR    | 0.046 | NO | 3.05 | 4.75 | - | up | - | no |
| chr19 | 29703501  | 29704750  | ENSG00000169021 | UQCDFS1  | ubiquinol-cytochr 5UTR   | 0.008 | NO | 1.49 | 2.89 | - | up | - | no |
| chr19 | 33792751  | 33794125  | ENSG00000245848 | CEBPA    | CCAAT/enhancer 5UTR      | 0.001 | NO | 1.56 | 2.27 | - | up | - | no |
| chr19 | 46271876  | 46273250  | ENSG00000177045 | SIX5     | SIX homeobox 5 [ 5UTR    | 0.000 | NO | 3.62 | 5.78 | - | up | - | no |
| chr19 | 47551376  | 47552625  | ENSG00000130748 | TMEM16C  | transmembrane Ꞥ 5UTR     | 0.001 | NO | 2.13 | 2.48 | - | up | - | no |
| chr19 | 55628501  | 55629750  | ENSG00000125503 | PPP1R12C | protein phosphat 5UTR    | 0.045 | NO | 0.64 | 2.27 | - | up | - | no |
| chr2  | 85132126  | 85133500  | ENSG00000034510 | TMSB10   | thymosin beta 10 5UTR    | 0.021 | NO | 1.21 | 4.13 | - | up | - | no |
| chr2  | 20250751  | 20252125  | ENSG00000068697 | LAPTM4A  | lysosomal protein 5UTR   | 0.000 | NO | 3.90 | 3.51 | - | up | - | no |
| chr21 | 46293001  | 46294250  | ENSG00000183255 | PTTG1IP  | pituitary tumor-tr 5UTR  | 0.015 | NO | 2.69 | 3.51 | - | up | - | no |
| chr3  | 51422001  | 51423250  | ENSG00000145050 | MANF     | mesencephalic as 5UTR    | 0.003 | NO | 1.77 | 2.68 | - | up | - | no |

|       |           |           |                 |          |                          |       |    |       |       |   |    |   |    |
|-------|-----------|-----------|-----------------|----------|--------------------------|-------|----|-------|-------|---|----|---|----|
| chr7  | 855501    | 856875    | ENSG00000164828 | SUN1     | Sad1 and UNC84 5UTR      | 0.008 | NO | 2.06  | 2.89  | - | up | - | no |
| chr7  | 106809501 | 106810875 | ENSG00000105856 | HBP1     | HMG-box transcri 5UTR    | 0.000 | NO | 2.20  | 5.57  | - | up | - | no |
| chr7  | 150076376 | 150077625 | ENSG00000196456 | ZNF775   | zinc finger proteir 5UTR | 0.010 | NO | 1.98  | 6.19  | - | up | - | no |
| chr9  | 117349251 | 117350500 | ENSG00000136888 | ATP6V1G1 | ATPase, H+ transp 5UTR   | 0.007 | NO | 3.83  | 5.16  | - | up | - | no |
| chr9  | 140445751 | 140447125 | ENSG00000182154 | MRPL41   | mitochondrial rib 5UTR   | 0.005 | NO | 2.20  | 4.75  | - | up | - | no |
| chr9  | 140063376 | 140064750 | ENSG00000184709 | LRRC26   | leucine rich repea 5UTR  | 0.005 | NO | 1.70  | 5.16  | - | up | - | no |
| chr1  | 120460001 | 120461250 | ENSG00000134250 | NOTCH2   | notch 2 [Source:Hexon    | 0.023 | NO | 2.13  | 4.34  | - | up | - | no |
| chr1  | 115197126 | 115198375 | ENSG00000175984 | DENND2C  | DENN/MADD don exon       | 0.016 | NO | 2.69  | 4.54  | - | up | - | no |
| chr15 | 52970876  | 52972250  | ENSG00000047346 | FAM214A  | family with seque exon   | 0.000 | NO | 2.98  | 6.19  | - | up | - | no |
| chr16 | 57569376  | 57570625  | ENSG00000135736 | CCDC102A | coiled-coil domai exon   | 0.042 | NO | 1.49  | 2.48  | - | up | - | no |
| chr19 | 55972376  | 55973875  | ENSG00000063241 | ISOC2    | isochorismatase c exon   | 0.001 | NO | 2.06  | 4.95  | - | up | - | no |
| chr19 | 58891626  | 58892875  | ENSG00000152475 | ZNF837   | zinc finger proteir exon | 0.006 | NO | 1.77  | 4.75  | - | up | - | no |
| chr19 | 58892001  | 58893250  | ENSG00000152475 | ZNF837   | zinc finger proteir exon | 0.023 | NO | 1.56  | 3.92  | - | up | - | no |
| chr20 | 43357126  | 43358500  | ENSG00000064205 | WISP2    | WNT1 inducible s exon    | 0.006 | NO | 2.34  | 4.13  | - | up | - | no |
| chr20 | 3677251   | 3678750   | ENSG00000088827 | SIGLEC1  | sialic acid binding exon | 0.012 | NO | 0.43  | 2.48  | - | up | - | no |
| chr20 | 35771001  | 35772500  | ENSG00000101353 | MROH8    | maestro heat-like exon   | 0.023 | NO | 0.64  | 1.86  | - | up | - | no |
| chr20 | 52210126  | 52211750  | ENSG00000171940 | ZNF217   | zinc finger proteir exon | 0.003 | NO | 4.82  | 14.04 | - | up | - | no |
| chr20 | 52193376  | 52194750  | ENSG00000171940 | ZNF217   | zinc finger proteir exon | 0.003 | NO | 17.37 | 15.07 | - | up | - | no |
| chr20 | 52607751  | 52609250  | ENSG00000064787 | BCAS1    | breast carcinoma exon    | 0.001 | NO | 21.91 | 22.91 | - | up | - | no |
| chr20 | 52601626  | 52603000  | ENSG00000064787 | BCAS1    | breast carcinoma exon    | 0.000 | NO | 18.43 | 17.55 | - | up | - | no |
| chr20 | 52573751  | 52575000  | ENSG00000064787 | BCAS1    | breast carcinoma exon    | 0.019 | NO | 21.05 | 18.58 | - | up | - | no |
| chr20 | 52610626  | 52612000  | ENSG00000064787 | BCAS1    | breast carcinoma exon    | 0.019 | NO | 18.43 | 14.86 | - | up | - | no |
| chr20 | 60902126  | 60903375  | ENSG00000130702 | LAMA5    | laminin, alpha 5 [1 exon | 0.041 | NO | 1.56  | 4.13  | - | up | - | no |
| chr6  | 112194001 | 112195375 | ENSG00000010810 | FYN      | FYN oncogene rel exon    | 0.013 | NO | 1.28  | 3.30  | - | up | - | no |
| chr7  | 75156876  | 75158125  | ENSG00000127957 | PMS2P3   | postmeiotic segre exon   | 0.022 | NO | 0.43  | 2.27  | - | up | - | no |
| chr8  | 101321626 | 101323125 | ENSG00000034677 | RNF19A   | ring finger proteir exon | 0.006 | NO | 2.84  | 7.02  | - | up | - | no |
| chr9  | 139843876 | 139845250 | ENSG00000184925 | LCN12    | lipocalin 12 [Sour exon  | 0.003 | NO | 2.48  | 3.51  | - | up | - | no |
| chrX  | 153193126 | 153194375 | ENSG00000089820 | ARHGAP4  | Rho GTPase activ: exon   | 0.006 | NO | 1.70  | 3.10  | - | up | - | no |
| chrX  | 153718376 | 153719750 | ENSG00000126903 | SLC10A3  | solute carrier fam exon  | 0.000 | NO | 2.27  | 2.89  | - | up | - | no |
| chr1  | 115170751 | 115172125 | ENSG00000175984 | DENND2C  | DENN/MADD don intron     | 0.003 | NO | 4.18  | 4.95  | - | up | - | no |
| chr1  | 117691626 | 117692875 | ENSG00000134258 | VTCN1    | V-set domain con intron  | 0.045 | NO | 2.13  | 4.54  | - | up | - | no |



|       |           |           |                 |         |                            |       |    |       |       |   |    |   |    |
|-------|-----------|-----------|-----------------|---------|----------------------------|-------|----|-------|-------|---|----|---|----|
| chr1  | 176921876 | 176923250 | ENSG00000152092 | ASTN1   | astrotactin 1 [Sou intron  | 0.006 | NO | 0.92  | 2.06  | - | up | - | no |
| chr11 | 61334251  | 61335500  | ENSG00000011347 | SYT7    | synaptotagmin VI intron    | 0.001 | NO | 1.56  | 2.89  | - | up | - | no |
| chr17 | 77290501  | 77291750  | ENSG00000167281 | RBFOX3  | RNA binding prot intron    | 0.047 | NO | 0.28  | 2.48  | - | up | - | no |
| chr19 | 46220001  | 46221375  | ENSG00000177051 | FBXO46  | F-box protein 46  intron   | 0.000 | NO | 3.26  | 2.89  | - | up | - | no |
| chr20 | 30068626  | 30070000  | ENSG00000088320 | REM1    | RAS (RAD and GEI intron    | 0.001 | NO | 0.71  | 2.48  | - | up | - | no |
| chr20 | 32430501  | 32431750  | ENSG00000101421 | CHMP4B  | charged multivesi intron   | 0.016 | NO | 0.28  | 2.27  | - | up | - | no |
| chr20 | 32430876  | 32432250  | ENSG00000101421 | CHMP4B  | charged multivesi intron   | 0.004 | NO | 0.57  | 2.48  | - | up | - | no |
| chr20 | 29893001  | 29894500  | ENSG00000215545 | DEFB116 | defensin, beta 11 intron   | 0.015 | NO | 0.78  | 2.48  | - | up | - | no |
| chr20 | 52208001  | 52209250  | ENSG00000171940 | ZNF217  | zinc finger proteir intron | 0.024 | NO | 2.76  | 5.78  | - | up | - | no |
| chr20 | 52208751  | 52210000  | ENSG00000171940 | ZNF217  | zinc finger proteir intron | 0.045 | NO | 4.75  | 8.67  | - | up | - | no |
| chr20 | 52616376  | 52617750  | ENSG00000064787 | BCAS1   | breast carcinoma intron    | 0.003 | NO | 7.44  | 12.59 | - | up | - | no |
| chr20 | 52652626  | 52653875  | ENSG00000064787 | BCAS1   | breast carcinoma intron    | 0.018 | NO | 4.68  | 6.81  | - | up | - | no |
| chr20 | 52615876  | 52617125  | ENSG00000064787 | BCAS1   | breast carcinoma intron    | 0.026 | NO | 10.07 | 14.04 | - | up | - | no |
| chr20 | 52598626  | 52599875  | ENSG00000064787 | BCAS1   | breast carcinoma intron    | 0.018 | NO | 12.97 | 17.96 | - | up | - | no |
| chr20 | 52599126  | 52600375  | ENSG00000064787 | BCAS1   | breast carcinoma intron    | 0.047 | NO | 12.97 | 17.34 | - | up | - | no |
| chr20 | 52600001  | 52601375  | ENSG00000064787 | BCAS1   | breast carcinoma intron    | 0.006 | NO | 17.51 | 22.29 | - | up | - | no |
| chr20 | 52588376  | 52589625  | ENSG00000064787 | BCAS1   | breast carcinoma intron    | 0.026 | NO | 9.71  | 11.35 | - | up | - | no |
| chr20 | 52670251  | 52671500  | ENSG00000064787 | BCAS1   | breast carcinoma intron    | 0.049 | NO | 8.58  | 9.70  | - | up | - | no |
| chr20 | 52628751  | 52630375  | ENSG00000064787 | BCAS1   | breast carcinoma intron    | 0.003 | NO | 16.87 | 18.79 | - | up | - | no |
| chr20 | 52681001  | 52682250  | ENSG00000064787 | BCAS1   | breast carcinoma intron    | 0.044 | NO | 12.48 | 13.83 | - | up | - | no |
| chr20 | 52671001  | 52672250  | ENSG00000064787 | BCAS1   | breast carcinoma intron    | 0.007 | NO | 6.52  | 7.23  | - | up | - | no |
| chr20 | 52676876  | 52678125  | ENSG00000064787 | BCAS1   | breast carcinoma intron    | 0.004 | NO | 10.85 | 11.97 | - | up | - | no |
| chr20 | 52629626  | 52631000  | ENSG00000064787 | BCAS1   | breast carcinoma intron    | 0.007 | NO | 16.73 | 18.37 | - | up | - | no |
| chr20 | 52592751  | 52594000  | ENSG00000064787 | BCAS1   | breast carcinoma intron    | 0.044 | NO | 13.75 | 15.07 | - | up | - | no |
| chr20 | 52665126  | 52666375  | ENSG00000064787 | BCAS1   | breast carcinoma intron    | 0.025 | NO | 8.86  | 9.50  | - | up | - | no |
| chr20 | 52594376  | 52595750  | ENSG00000064787 | BCAS1   | breast carcinoma intron    | 0.004 | NO | 15.60 | 16.51 | - | up | - | no |
| chr20 | 52621001  | 52622250  | ENSG00000064787 | BCAS1   | breast carcinoma intron    | 0.003 | NO | 10.35 | 10.94 | - | up | - | no |
| chr20 | 52656876  | 52658125  | ENSG00000064787 | BCAS1   | breast carcinoma intron    | 0.001 | NO | 8.01  | 8.26  | - | up | - | no |
| chr20 | 52578376  | 52579625  | ENSG00000064787 | BCAS1   | breast carcinoma intron    | 0.018 | NO | 14.25 | 14.66 | - | up | - | no |
| chr20 | 52640126  | 52641375  | ENSG00000064787 | BCAS1   | breast carcinoma intron    | 0.048 | NO | 12.76 | 12.80 | - | up | - | no |
| chr20 | 52613376  | 52614625  | ENSG00000064787 | BCAS1   | breast carcinoma intron    | 0.025 | NO | 21.27 | 21.26 | - | up | - | no |

|       |           |           |                 |            |                           |       |     |       |       |   |      |    |    |
|-------|-----------|-----------|-----------------|------------|---------------------------|-------|-----|-------|-------|---|------|----|----|
| chr20 | 52585251  | 52586500  | ENSG00000064787 | BCAS1      | breast carcinoma intron   | 0.019 | NO  | 18.93 | 18.79 | - | up   | -  | no |
| chr20 | 52636376  | 52637625  | ENSG00000064787 | BCAS1      | breast carcinoma intron   | 0.003 | NO  | 9.64  | 9.50  | - | up   | -  | no |
| chr20 | 52618626  | 52619875  | ENSG00000064787 | BCAS1      | breast carcinoma intron   | 0.049 | NO  | 14.39 | 13.83 | - | up   | -  | no |
| chr20 | 52571751  | 52573125  | ENSG00000064787 | BCAS1      | breast carcinoma intron   | 0.001 | NO  | 13.97 | 13.42 | - | up   | -  | no |
| chr20 | 52655876  | 52657250  | ENSG00000064787 | BCAS1      | breast carcinoma intron   | 0.006 | NO  | 11.84 | 11.35 | - | up   | -  | no |
| chr20 | 52562376  | 52564000  | ENSG00000064787 | BCAS1      | breast carcinoma intron   | 0.000 | NO  | 17.44 | 16.51 | - | up   | -  | no |
| chr20 | 52581501  | 52583125  | ENSG00000064787 | BCAS1      | breast carcinoma intron   | 0.000 | NO  | 12.55 | 10.94 | - | up   | -  | no |
| chr20 | 52669251  | 52670875  | ENSG00000064787 | BCAS1      | breast carcinoma intron   | 0.000 | NO  | 10.92 | 9.50  | - | up   | -  | no |
| chr20 | 52593876  | 52595125  | ENSG00000064787 | BCAS1      | breast carcinoma intron   | 0.042 | NO  | 12.97 | 10.94 | - | up   | -  | no |
| chr20 | 52632501  | 52633750  | ENSG00000064787 | BCAS1      | breast carcinoma intron   | 0.030 | NO  | 11.56 | 8.67  | - | up   | -  | no |
| chr22 | 20008876  | 20010125  | ENSG00000183597 | TANGO2     | transport and golj intron | 0.018 | NO  | 0.78  | 1.86  | - | up   | -  | no |
| chr3  | 173300126 | 173301375 | ENSG00000169760 | NLGN1      | neuroligin 1 [Sour intron | 0.034 | NO  | 0.92  | 2.89  | - | up   | -  | no |
| chr3  | 195430751 | 195432000 | ENSG00000242086 | AC069513.3 | intron                    | 0.027 | NO  | 2.34  | 4.34  | - | up   | -  | no |
| chr1  | 152025501 | 152026875 | ENSG00000163191 | S100A11    | S100 calcium binc upstre  | 0.002 | NO  | 1.63  | 4.54  | - | up   | -  | no |
| chr13 | 32413126  | 32414375  | ENSG00000229715 | EEF1DP3    | eukaryotic transla upstre | 0.002 | YES | 1.35  | 2.27  | - | up   | -  | na |
| chr1  | 145105126 | 145106375 | ENSG00000223380 | SEC22B     | SEC22 vesicle traf intron | 0.001 | YES | 3.40  | 4.75  | - | up   | -  | na |
| chr19 | 36235751  | 36237125  | ENSG00000267120 | AD000671   | Uncharacterized f 5UTR    | 0.000 | NO  | 1.91  | 3.51  | - | up   | -  | na |
| chr2  | 74684751  | 74686125  | ENSG00000239779 | WBP1       | WW domain bind 5UTR       | 0.005 | NO  | 3.62  | 5.78  | - | up   | -  | na |
| chr1  | 145100876 | 145102125 | ENSG00000223380 | SEC22B     | SEC22 vesicle traf exon   | 0.000 | NO  | 4.47  | 4.75  | - | up   | -  | na |
| chr1  | 145116001 | 145117375 | ENSG00000223380 | SEC22B     | SEC22 vesicle traf exon   | 0.002 | NO  | 6.81  | 6.19  | - | up   | -  | na |
| chr1  | 145109001 | 145110250 | ENSG00000223380 | SEC22B     | SEC22 vesicle traf exon   | 0.026 | NO  | 4.18  | 3.30  | - | up   | -  | na |
| chr1  | 145098501 | 145099750 | ENSG00000223380 | SEC22B     | SEC22 vesicle traf intron | 0.021 | NO  | 4.04  | 4.75  | - | up   | -  | na |
| chr1  | 145087501 | 145088750 | ENSG00000223380 | SEC22B     | SEC22 vesicle traf upstre | 0.040 | NO  | 4.89  | 4.95  | - | up   | -  | na |
| chr5  | 176433126 | 176434500 | ENSG00000087206 | UIMC1      | ubiquitin interact exon   | 0.000 | YES | 2.91  | 4.95  | - | dowr | up | no |
| chr12 | 120553876 | 120555500 | ENSG00000111737 | RAB35      | RAB35, member f 5UTR      | 0.000 | YES | 10.00 | 27.87 | - | dowr | up | no |
| chr21 | 43429501  | 43430875  | ENSG00000173276 | ZBTB21     | zinc finger and BT exon   | 0.000 | YES | 5.10  | 8.05  | - | dowr | up | no |
| chr11 | 13298376  | 13299750  | ENSG00000133794 | ARNTL      | aryl hydrocarbon 5UTR     | 0.000 | NO  | 3.97  | 4.75  | - | dowr | up | no |
| chr12 | 82751501  | 82752750  | ENSG00000133773 | CCDC59     | coiled-coil domain 5UTR   | 0.045 | NO  | 2.41  | 3.72  | - | dowr | up | no |
| chr13 | 31191001  | 31192375  | ENSG00000132952 | USPL1      | ubiquitin specific 5UTR   | 0.011 | NO  | 4.96  | 6.19  | - | dowr | up | no |
| chr22 | 38200626  | 38201875  | ENSG00000189060 | H1F0       | H1 histone family 5UTR    | 0.012 | NO  | 1.84  | 2.89  | - | dowr | up | no |
| chr3  | 10183001  | 10184250  | ENSG00000134086 | VHL        | von Hippel-Lindau 5UTR    | 0.001 | NO  | 1.56  | 4.13  | - | dowr | up | no |

|       |           |           |                 |         |                           |       |     |       |       |   |      |      |    |
|-------|-----------|-----------|-----------------|---------|---------------------------|-------|-----|-------|-------|---|------|------|----|
| chr17 | 57048376  | 57049625  | ENSG00000175175 | PPM1E   | protein phosphat exon     | 0.045 | NO  | 9.29  | 11.97 | - | dowr | up   | no |
| chr2  | 71453626  | 71454875  | ENSG00000124374 | PAIP2B  | poly(A) binding prexon    | 0.011 | NO  | 2.84  | 3.51  | - | dowr | up   | no |
| chr20 | 32108751  | 32110125  | ENSG00000078699 | CBFA2T2 | core-binding factr intron | 0.003 | NO  | 0.43  | 2.06  | - | dowr | up   | no |
| chr20 | 32109501  | 32110750  | ENSG00000078699 | CBFA2T2 | core-binding factr intron | 0.039 | NO  | 0.43  | 1.86  | - | dowr | up   | no |
| chr20 | 32086376  | 32087875  | ENSG00000078699 | CBFA2T2 | core-binding factr intron | 0.000 | NO  | 0.43  | 1.65  | - | dowr | up   | no |
| chr17 | 56830001  | 56831250  | ENSG00000175175 | PPM1E   | protein phosphat upstre   | 0.049 | NO  | 4.40  | 6.81  | - | dowr | up   | no |
| chr1  | 91965751  | 91967125  | ENSG00000097046 | CDC7    | cell division cycle 5UTR  | 0.000 | YES | 2.84  | 4.54  | - | dowr | down | no |
| chr3  | 79577376  | 79578625  | ENSG00000169855 | ROBO1   | roundabout, axor intron   | 0.031 | YES | 0.21  | 2.27  | - | dowr | down | no |
| chr3  | 155352376 | 155353750 | ENSG00000114805 | PLCH1   | phospholipase C, intron   | 0.003 | YES | 1.56  | 3.51  | - | dowr | down | no |
| chr9  | 91925001  | 91926750  | ENSG00000123975 | CKS2    | CDC28 protein kir 5UTR    | 0.000 | YES | 7.16  | 7.43  | - | dowr | down | no |
| chr9  | 127702626 | 127704125 | ENSG00000136935 | GOLGA1  | golgin A1 [Source exon    | 0.000 | YES | 3.12  | 6.61  | - | dowr | down | no |
| chr9  | 140134751 | 140136375 | ENSG00000188229 | TUBB4B  | tubulin, beta 4B c 5UTR   | 0.000 | YES | 5.81  | 7.23  | - | dowr | down | no |
| chr11 | 65028501  | 65030125  | ENSG0000014138  | POLA2   | polymerase (DNA 5UTR      | 0.000 | YES | 5.39  | 15.28 | - | dowr | down | no |
| chr13 | 107187376 | 107188625 | ENSG00000125266 | EFNB2   | ephrin-B2 [Source 5UTR    | 0.007 | YES | 1.28  | 2.48  | - | dowr | down | no |
| chr17 | 59822751  | 59824250  | ENSG00000136492 | BRIP1   | BRCA1 interacting intron  | 0.000 | YES | 10.42 | 10.73 | - | dowr | down | no |
| chr17 | 59835126  | 59836375  | ENSG00000136492 | BRIP1   | BRCA1 interacting intron  | 0.021 | YES | 8.15  | 11.15 | - | dowr | down | no |
| chr17 | 59861626  | 59863250  | ENSG00000136492 | BRIP1   | BRCA1 interacting exon    | 0.026 | YES | 19.21 | 16.51 | - | dowr | down | no |
| chr17 | 59940376  | 59941625  | ENSG00000136492 | BRIP1   | BRCA1 interacting exon    | 0.045 | YES | 29.14 | 36.95 | - | dowr | down | no |
| chr21 | 33650751  | 33652375  | ENSG00000159055 | MIS18A  | MIS18 kinetochor 5UTR     | 0.000 | YES | 5.95  | 13.01 | - | dowr | down | no |
| chr2  | 234762626 | 234764000 | ENSG00000123485 | HJURP   | Holliday junction 5UTR    | 0.003 | YES | 1.70  | 3.30  | - | dowr | down | no |
| chr20 | 25405126  | 25406500  | ENSG00000101003 | GIN51   | GIN5 complex su           | 0.035 | NO  | 0.92  | 1.03  | - | dowr | down | no |
| chr20 | 31394501  | 31395750  | ENSG00000088305 | DNMT3B  | DNA (cytosine-5-) 3UTR    | 0.047 | NO  | 1.06  | 2.06  | - | dowr | down | no |
| chr1  | 117602001 | 117603625 | ENSG00000116830 | TTF2    | transcription tern 5UTR   | 0.001 | NO  | 6.45  | 7.43  | - | dowr | down | no |
| chr1  | 212208376 | 212209750 | ENSG00000143476 | DTL     | denticleless E3 ut 5UTR   | 0.012 | NO  | 3.26  | 4.13  | - | dowr | down | no |
| chr11 | 66035376  | 66036750  | ENSG00000174903 | RAB1B   | RAB1B, member f 5UTR      | 0.000 | NO  | 1.70  | 5.37  | - | dowr | down | no |
| chr12 | 102513376 | 102514625 | ENSG00000185480 | PARPBP  | PARP1 binding pr 5UTR     | 0.005 | NO  | 1.91  | 4.95  | - | dowr | down | no |
| chr12 | 109535251 | 109536625 | ENSG00000076248 | UNG     | uracil-DNA glycos 5UTR    | 0.000 | NO  | 4.96  | 6.40  | - | dowr | down | no |
| chr14 | 24610251  | 24611500  | ENSG00000100908 | EMC9    | ER membrane prc 5UTR      | 0.003 | NO  | 2.06  | 3.72  | - | dowr | down | no |
| chr15 | 90118001  | 90119250  | ENSG00000140534 | TICRR   | TOPBP1-interactii 5UTR    | 0.003 | NO  | 2.13  | 2.89  | - | dowr | down | no |
| chr16 | 103001    | 104375    | ENSG00000161981 | SNRNP25 | small nuclear ribo 5UTR   | 0.000 | NO  | 4.18  | 4.34  | - | dowr | down | no |
| chr16 | 29801251  | 29802625  | ENSG00000079616 | KIF22   | kinesin family me 5UTR    | 0.003 | NO  | 1.84  | 4.54  | - | dowr | down | no |

|       |           |           |                 |         |                           |       |    |       |       |   |      |      |    |
|-------|-----------|-----------|-----------------|---------|---------------------------|-------|----|-------|-------|---|------|------|----|
| chr16 | 46722751  | 46724125  | ENSG00000091651 | ORC6    | origin recognition 5UTR   | 0.000 | NO | 1.91  | 5.99  | - | dowr | down | no |
| chr16 | 81039876  | 81041125  | ENSG00000166451 | CENPN   | centromere prote 5UTR     | 0.003 | NO | 4.61  | 5.16  | - | dowr | down | no |
| chr16 | 18812251  | 18813750  | ENSG00000170540 | ARL6IP1 | ADP-ribosylation 5UTR     | 0.001 | NO | 3.83  | 5.16  | - | dowr | down | no |
| chr16 | 89882501  | 89884000  | ENSG00000187741 | FANCA   | Fanconi anemia, c 5UTR    | 0.000 | NO | 2.76  | 4.95  | - | dowr | down | no |
| chr17 | 59937876  | 59939125  | ENSG00000136492 | BRIP1   | BRCA1 interacting 5UTR    | 0.005 | NO | 8.72  | 12.18 | - | dowr | down | no |
| chr19 | 796751    | 798000    | ENSG00000011304 | PTBP1   | polypyrimidine tr 5UTR    | 0.008 | NO | 2.41  | 3.92  | - | dowr | down | no |
| chr2  | 10262126  | 10263375  | ENSG00000171848 | RRM2    | ribonucleotide re 5UTR    | 0.037 | NO | 3.33  | 3.92  | - | dowr | down | no |
| chr2  | 27008126  | 27009375  | ENSG00000115163 | CENPA   | centromere prote 5UTR     | 0.001 | NO | 2.62  | 3.51  | - | dowr | down | no |
| chr2  | 111435001 | 111436375 | ENSG00000169679 | BUB1    | BUB1 mitotic chei 5UTR    | 0.016 | NO | 1.56  | 2.68  | - | dowr | down | no |
| chr20 | 30326251  | 30327625  | ENSG00000088325 | TPX2    | TPX2, microtubul 5UTR     | 0.000 | NO | 3.19  | 3.92  | - | dowr | down | no |
| chr21 | 47743251  | 47744625  | ENSG00000160299 | PCNT    | pericentrin [Sourc 5UTR   | 0.000 | NO | 3.69  | 7.02  | - | dowr | down | no |
| chr4  | 104119126 | 104120375 | ENSG00000138778 | CENPE   | centromere prote 5UTR     | 0.033 | NO | 1.13  | 3.10  | - | dowr | down | no |
| chr4  | 185654626 | 185656000 | ENSG00000151725 | MLF1IP  | MLF1 interacting 5UTR     | 0.001 | NO | 1.63  | 3.10  | - | dowr | down | no |
| chr5  | 43602751  | 43604000  | ENSG00000112992 | NNT     | nicotinamide nucl 5UTR    | 0.020 | NO | 0.92  | 3.10  | - | dowr | down | no |
| chr5  | 67511001  | 67512250  | ENSG00000145675 | PIK3R1  | phosphoinositide 5UTR     | 0.013 | NO | 0.57  | 3.92  | - | dowr | down | no |
| chr7  | 77427126  | 77428625  | ENSG00000006576 | PHTF2   | putative homeod 5UTR      | 0.000 | NO | 3.33  | 4.54  | - | dowr | down | no |
| chr8  | 124408001 | 124409750 | ENSG00000156802 | ATAD2   | ATPase family, AA 5UTR    | 0.000 | NO | 8.08  | 8.05  | - | dowr | down | no |
| chr9  | 86594501  | 86595875  | ENSG00000178966 | RMI1    | RMI1, RecQ medi 5UTR      | 0.000 | NO | 5.81  | 7.43  | - | dowr | down | no |
| chr6  | 30688626  | 30690000  | ENSG00000196230 | TUBB    | tubulin, beta clas 5UTR   | 0.003 | NO | 1.84  | 2.27  | - | dowr | down | no |
| chr1  | 47779376  | 47780625  | ENSG00000123473 | STIL    | SCL/TAL1 interrup exon    | 0.048 | NO | 2.48  | 2.48  | - | dowr | down | no |
| chr1  | 202310501 | 202311875 | ENSG00000077152 | UBE2T   | ubiquitin-conjuga exon    | 0.001 | NO | 3.40  | 3.92  | - | dowr | down | no |
| chr17 | 59821876  | 59823125  | ENSG00000136492 | BRIP1   | BRCA1 interacting exon    | 0.042 | NO | 10.49 | 12.39 | - | dowr | down | no |
| chr17 | 59936751  | 59938000  | ENSG00000136492 | BRIP1   | BRCA1 interacting exon    | 0.018 | NO | 11.77 | 11.77 | - | dowr | down | no |
| chr19 | 3171751   | 3173000   | ENSG00000125910 | S1PR4   | sphingosine-1-ph exon     | 0.028 | NO | 0.14  | 2.27  | - | dowr | down | no |
| chr20 | 31394126  | 31395375  | ENSG00000088305 | DNMT3B  | DNA (cytosine-5-) exon    | 0.008 | NO | 1.06  | 2.27  | - | dowr | down | no |
| chr20 | 35401626  | 35403000  | ENSG00000149636 | DSN1    | DSN1, MIND kinei exon     | 0.005 | NO | 1.77  | 3.30  | - | dowr | down | no |
| chr6  | 136570876 | 136572125 | ENSG00000146410 | MTFR2   | mitochondrial fiss exon   | 0.006 | NO | 2.27  | 3.10  | - | dowr | down | no |
| chr13 | 34395626  | 34396875  | ENSG00000133119 | RFC3    | replication factor intron | 0.020 | NO | 1.70  | 4.13  | - | dowr | down | no |
| chr13 | 39273751  | 39275000  | ENSG00000150893 | FREM2   | FRAS1 related ext intron  | 0.039 | NO | 2.06  | 3.10  | - | dowr | down | no |
| chr17 | 59873626  | 59875125  | ENSG00000136492 | BRIP1   | BRCA1 interacting intron  | 0.034 | NO | 12.83 | 17.13 | - | dowr | down | no |
| chr17 | 59866376  | 59867875  | ENSG00000136492 | BRIP1   | BRCA1 interacting intron  | 0.004 | NO | 7.44  | 9.70  | - | dowr | down | no |

|       |           |           |                 |        |                          |       |     |       |       |   |      |      |    |
|-------|-----------|-----------|-----------------|--------|--------------------------|-------|-----|-------|-------|---|------|------|----|
| chr17 | 59829501  | 59830750  | ENSG00000136492 | BRIP1  | BRCA1 interacting intron | 0.025 | NO  | 9.92  | 12.80 | - | dowr | down | no |
| chr17 | 59856001  | 59857250  | ENSG00000136492 | BRIP1  | BRCA1 interacting intron | 0.043 | NO  | 8.44  | 10.73 | - | dowr | down | no |
| chr17 | 59916626  | 59917875  | ENSG00000136492 | BRIP1  | BRCA1 interacting intron | 0.007 | NO  | 10.00 | 12.59 | - | dowr | down | no |
| chr17 | 59787126  | 59788375  | ENSG00000136492 | BRIP1  | BRCA1 interacting intron | 0.004 | NO  | 13.26 | 16.31 | - | dowr | down | no |
| chr17 | 59847376  | 59848625  | ENSG00000136492 | BRIP1  | BRCA1 interacting intron | 0.006 | NO  | 10.70 | 11.97 | - | dowr | down | no |
| chr17 | 59813126  | 59814500  | ENSG00000136492 | BRIP1  | BRCA1 interacting intron | 0.002 | NO  | 9.50  | 10.32 | - | dowr | down | no |
| chr17 | 59932376  | 59933875  | ENSG00000136492 | BRIP1  | BRCA1 interacting intron | 0.021 | NO  | 13.04 | 14.04 | - | dowr | down | no |
| chr17 | 59830251  | 59831500  | ENSG00000136492 | BRIP1  | BRCA1 interacting intron | 0.020 | NO  | 9.78  | 10.53 | - | dowr | down | no |
| chr17 | 59909126  | 59910375  | ENSG00000136492 | BRIP1  | BRCA1 interacting intron | 0.048 | NO  | 11.56 | 12.39 | - | dowr | down | no |
| chr17 | 59881876  | 59883125  | ENSG00000136492 | BRIP1  | BRCA1 interacting intron | 0.022 | NO  | 9.85  | 10.53 | - | dowr | down | no |
| chr17 | 59893376  | 59894625  | ENSG00000136492 | BRIP1  | BRCA1 interacting intron | 0.049 | NO  | 19.42 | 20.23 | - | dowr | down | no |
| chr17 | 59842626  | 59844250  | ENSG00000136492 | BRIP1  | BRCA1 interacting intron | 0.000 | NO  | 12.62 | 13.01 | - | dowr | down | no |
| chr17 | 59914626  | 59915875  | ENSG00000136492 | BRIP1  | BRCA1 interacting intron | 0.048 | NO  | 9.92  | 9.91  | - | dowr | down | no |
| chr17 | 59916001  | 59917250  | ENSG00000136492 | BRIP1  | BRCA1 interacting intron | 0.009 | NO  | 11.63 | 11.56 | - | dowr | down | no |
| chr17 | 59907626  | 59908875  | ENSG00000136492 | BRIP1  | BRCA1 interacting intron | 0.025 | NO  | 5.88  | 5.78  | - | dowr | down | no |
| chr17 | 59801376  | 59802625  | ENSG00000136492 | BRIP1  | BRCA1 interacting intron | 0.033 | NO  | 14.75 | 14.24 | - | dowr | down | no |
| chr17 | 59840376  | 59841875  | ENSG00000136492 | BRIP1  | BRCA1 interacting intron | 0.039 | NO  | 18.72 | 15.90 | - | dowr | down | no |
| chr17 | 59782876  | 59784125  | ENSG00000136492 | BRIP1  | BRCA1 interacting intron | 0.010 | NO  | 10.70 | 8.67  | - | dowr | down | no |
| chr17 | 59805001  | 59806250  | ENSG00000136492 | BRIP1  | BRCA1 interacting intron | 0.023 | NO  | 12.26 | 9.91  | - | dowr | down | no |
| chr17 | 59882626  | 59883875  | ENSG00000136492 | BRIP1  | BRCA1 interacting intron | 0.009 | NO  | 16.52 | 13.21 | - | dowr | down | no |
| chr17 | 59833751  | 59835000  | ENSG00000136492 | BRIP1  | BRCA1 interacting intron | 0.025 | NO  | 16.09 | 12.80 | - | dowr | down | no |
| chr17 | 59810626  | 59811875  | ENSG00000136492 | BRIP1  | BRCA1 interacting intron | 0.012 | NO  | 15.24 | 11.15 | - | dowr | down | no |
| chr2  | 155656751 | 155658000 | ENSG00000162989 | KCNJ3  | potassium inward intron  | 0.005 | NO  | 1.84  | 3.30  | - | dowr | down | no |
| chr3  | 184968126 | 184969500 | ENSG00000113790 | EHHADH | enoyl-CoA, hydrat intron | 0.034 | NO  | 0.57  | 1.65  | - | dowr | down | no |
| chr3  | 192333376 | 192334750 | ENSG00000114279 | FGF12  | fibroblast growth intron | 0.011 | NO  | 0.99  | 2.68  | - | dowr | down | no |
| chr3  | 192067751 | 192069000 | ENSG00000114279 | FGF12  | fibroblast growth intron | 0.043 | NO  | 1.06  | 2.68  | - | dowr | down | no |
| chr7  | 94287251  | 94288500  | ENSG00000242265 | PEG10  | paternally expres intron | 0.030 | NO  | 0.78  | 2.89  | - | dowr | down | no |
| chr7  | 152372501 | 152374000 | ENSG00000196584 | XRCC2  | X-ray repair comp 5UTR   | 0.000 | YES | 6.17  | 11.97 | - | dowr | down | na |
| chr1  | 65799376  | 65800625  | ENSG00000116675 | DNAJC6 | DnaJ (Hsp40) hom intron  | 0.044 | YES | 0.85  | 2.06  | - | dowr | -    | no |
| chr1  | 65869501  | 65870750  | ENSG00000116675 | DNAJC6 | DnaJ (Hsp40) hom intron  | 0.044 | YES | 0.71  | 1.65  | - | dowr | -    | no |
| chr1  | 90460001  | 90461250  | ENSG00000162664 | ZNF326 | zinc finger proteir 5UTR | 0.024 | YES | 0.78  | 2.27  | - | dowr | -    | no |

|       |           |           |                 |           |                        |      |       |     |       |       |   |      |   |    |
|-------|-----------|-----------|-----------------|-----------|------------------------|------|-------|-----|-------|-------|---|------|---|----|
| chr3  | 122134251 | 122135750 | ENSG00000196981 | WDR5B     | WD repeat domai        | 5UTR | 0.000 | YES | 3.05  | 5.99  | - | dowr | - | no |
| chr5  | 14664001  | 14665375  | ENSG00000154124 | FAM105B   | family with seque      | 5UTR | 0.000 | YES | 3.26  | 5.78  | - | dowr | - | no |
| chr5  | 96518751  | 96520125  | ENSG00000058729 | RIOK2     | RIO kinase 2 [Sou      | 5UTR | 0.000 | YES | 2.20  | 4.75  | - | dowr | - | no |
| chr5  | 145582376 | 145583750 | ENSG00000091009 | RBM27     | RNA binding moti       | 5UTR | 0.001 | YES | 1.63  | 3.51  | - | dowr | - | no |
| chr6  | 27774501  | 27775750  | ENSG00000185130 | HIST1H2B  | histone cluster 1,     | 5UTR | 0.044 | YES | 1.13  | 1.65  | - | dowr | - | no |
| chr6  | 39082251  | 39083750  | ENSG00000112167 | SAYSD1    | SAYSVFN motif dc       | 5UTR | 0.000 | YES | 5.25  | 10.73 | - | dowr | - | no |
| chr6  | 41039626  | 41041375  | ENSG00000001167 | NFYA      | nuclear transcript     | 5UTR | 0.000 | YES | 5.18  | 9.29  | - | dowr | - | no |
| chr6  | 43543126  | 43544625  | ENSG00000124571 | XPO5      | exportin 5 [Sourc      | 5UTR | 0.000 | YES | 4.89  | 10.32 | - | dowr | - | no |
| chr6  | 52535251  | 52536500  | ENSG00000096092 | TMEM14A   | transmembrane p        | 5UTR | 0.000 | YES | 1.06  | 2.89  | - | dowr | - | no |
| chr6  | 88411251  | 88412750  | ENSG00000135334 | AKIRIN2   | akirin 2 [Source:H     | 5UTR | 0.000 | YES | 3.40  | 5.57  | - | dowr | - | no |
| chr7  | 154794376 | 154795875 | ENSG00000157212 | PAXIP1    | PAX interacting (v     | 5UTR | 0.000 | YES | 2.41  | 5.78  | - | dowr | - | no |
| chrX  | 17754626  | 17756000  | ENSG00000047634 | SCML1     | sex comb on midl       | 5UTR | 0.000 | YES | 1.98  | 3.51  | - | dowr | - | no |
| chr8  | 42248626  | 42250000  | ENSG00000078668 | VDAC3     | voltage-depender       | 5UTR | 0.000 | YES | 1.06  | 5.37  | - | dowr | - | no |
| chr9  | 131266376 | 131267750 | ENSG00000119392 | GLE1      | GLE1 RNA export        | 5UTR | 0.000 | YES | 2.06  | 4.34  | - | dowr | - | no |
| chr9  | 131842626 | 131844250 | ENSG00000167130 | DOLPP1    | dolichyl pyrophos      | 5UTR | 0.000 | YES | 7.51  | 7.84  | - | dowr | - | no |
| chr9  | 133568376 | 133569875 | ENSG00000130713 | EXOSC2    | exosome compon         | 5UTR | 0.000 | YES | 1.70  | 4.75  | - | dowr | - | no |
| chr10 | 12084626  | 12086000  | ENSG00000151461 | UPF2      | UPF2 regulator of exon | 5UTR | 0.000 | YES | 2.98  | 5.78  | - | dowr | - | no |
| chr10 | 14879376  | 14880750  | ENSG00000187522 | HSPA14    | heat shock 70kDa       | 5UTR | 0.000 | YES | 2.91  | 5.57  | - | dowr | - | no |
| chr10 | 15138376  | 15140125  | ENSG00000152464 | RPP38     | ribonuclease P/M       | 5UTR | 0.000 | YES | 4.89  | 15.90 | - | dowr | - | no |
| chr10 | 27388626  | 27390250  | ENSG00000107890 | ANKRD26   | ankyrin repeat do      | 5UTR | 0.000 | YES | 16.45 | 36.33 | - | dowr | - | no |
| chr10 | 47084876  | 47086250  | ENSG00000204174 | NPY4R     | neuropeptide Y re      | 5UTR | 0.000 | YES | 1.63  | 4.95  | - | dowr | - | no |
| chr11 | 9481501   | 9483250   | ENSG00000166478 | ZNF143    | zinc finger proteir    | 5UTR | 0.000 | YES | 12.12 | 17.75 | - | dowr | - | no |
| chr11 | 66383251  | 66384875  | ENSG00000239306 | RBM14     | RNA binding moti       | 5UTR | 0.000 | YES | 5.81  | 10.73 | - | dowr | - | no |
| chr11 | 76091626  | 76093000  | ENSG00000179240 | RP11-1111 | Protein LOC1005        | 5UTR | 0.000 | YES | 2.27  | 3.72  | - | dowr | - | no |
| chr11 | 125756876 | 125758250 | ENSG00000198331 | HYLS1     | hydrolethalus syn      | 5UTR | 0.000 | YES | 2.27  | 6.61  | - | dowr | - | no |
| chr11 | 125757501 | 125758750 | ENSG00000198331 | HYLS1     | hydrolethalus syn      | 5UTR | 0.015 | YES | 2.06  | 6.19  | - | dowr | - | no |
| chr11 | 134093501 | 134095250 | ENSG00000151503 | NCAPD3    | non-SMC conden:        | 5UTR | 0.000 | YES | 6.66  | 16.51 | - | dowr | - | no |
| chr12 | 27090251  | 27091625  | ENSG00000111790 | FGFR1OP2  | FGFR1 oncogene         | 5UTR | 0.000 | YES | 2.48  | 6.40  | - | dowr | - | no |
| chr12 | 53772626  | 53774500  | ENSG00000185591 | SP1       | Sp1 transcription      | 5UTR | 0.000 | YES | 6.81  | 11.77 | - | dowr | - | no |
| chr12 | 69752626  | 69754250  | ENSG00000127337 | YEATS4    | YEATS domain coi       | 5UTR | 0.000 | YES | 7.94  | 14.45 | - | dowr | - | no |
| chr12 | 106751126 | 106752500 | ENSG00000013503 | POLR3B    | polymerase (RNA        | 5UTR | 0.000 | YES | 3.76  | 6.40  | - | dowr | - | no |

|       |           |           |                 |          |                      |         |       |     |       |       |   |      |   |    |
|-------|-----------|-----------|-----------------|----------|----------------------|---------|-------|-----|-------|-------|---|------|---|----|
| chr13 | 31039501  | 31040875  | ENSG00000189403 | HMGB1    | high mobility gro    | exon    | 0.000 | YES | 2.98  | 4.13  | - | dowr | - | no |
| chr13 | 48668626  | 48670000  | ENSG00000136146 | MED4     | mediator comple      | 5UTR    | 0.000 | YES | 1.56  | 3.92  | - | dowr | - | no |
| chr13 | 49106126  | 49107625  | ENSG00000136161 | RCBTB2   | regulator of chr     | exon    | 0.000 | YES | 3.54  | 6.81  | - | dowr | - | no |
| chr13 | 77565501  | 77566875  | ENSG00000102805 | CLN5     | ceroid-lipofuscinc   | 5UTR    | 0.002 | YES | 2.27  | 3.10  | - | dowr | - | no |
| chr15 | 83679626  | 83681125  | ENSG00000169609 | C15orf40 | chromosome 15 c      | 5UTR    | 0.000 | YES | 4.40  | 8.46  | - | dowr | - | no |
| chr16 | 29826626  | 29828250  | ENSG00000185928 | PAGR1    | PAXIP1 associatec    | 5UTR    | 0.000 | YES | 6.95  | 17.96 | - | dowr | - | no |
| chr16 | 90038251  | 90039750  | ENSG00000177946 | CENPBD1  | CENPB DNA-bind       | 5UTR    | 0.000 | YES | 11.34 | 21.68 | - | dowr | - | no |
| chr17 | 45972876  | 45974250  | ENSG00000167182 | SP2      | Sp2 transcription    | 5UTR    | 0.009 | YES | 10.35 | 10.12 | - | dowr | - | no |
| chr17 | 57232001  | 57233375  | ENSG00000182628 | SKA2     | spindle and kinet    | 5UTR    | 0.000 | YES | 11.20 | 12.18 | - | dowr | - | no |
| chr17 | 57968876  | 57970125  | ENSG00000108423 | TUBD1    | tubulin, delta 1     | [S 5UTR | 0.048 | YES | 18.57 | 37.78 | - | dowr | - | no |
| chr1  | 150335376 | 150336875 | ENSG00000163125 | RPRD2    | regulation of nucl   | exon    | 0.000 | YES | 4.11  | 7.43  | - | dowr | - | no |
| chr20 | 23341751  | 23343375  | ENSG00000125812 | GZF1     | GDNF-inducible zi    | 5UTR    | 0.000 | YES | 3.40  | 7.02  | - | dowr | - | no |
| chr1  | 161128501 | 161130000 | ENSG00000143258 | USP21    | ubiquitin specific   | 5UTR    | 0.000 | YES | 3.05  | 8.46  | - | dowr | - | no |
| chr1  | 38396876  | 38398250  | ENSG00000204084 | INPP5B   | inositol polyphos    | 5UTR    | 0.000 | YES | 2.13  | 3.51  | - | dowr | - | no |
| chr1  | 182807751 | 182809125 | ENSG00000135829 | DHX9     | DEAH (Asp-Glu-Al     | 5UTR    | 0.000 | YES | 6.31  | 7.43  | - | dowr | - | no |
| chr20 | 44440376  | 44441750  | ENSG00000175063 | UBE2C    | ubiquitin-conjuga    | 5UTR    | 0.000 | YES | 5.18  | 5.99  | - | dowr | - | no |
| chr1  | 211848626 | 211850000 | ENSG00000117650 | NEK2     | NIMA-related kin     | 5UTR    | 0.000 | YES | 1.63  | 3.72  | - | dowr | - | no |
| chr20 | 50807251  | 50808750  | ENSG0000020256  | ZFP64    | ZFP64 zinc finger    | 5UTR    | 0.000 | YES | 6.24  | 7.23  | - | dowr | - | no |
| chr1  | 217921876 | 217923250 | ENSG00000162814 | SPATA17  | spermatogenesis      | intron  | 0.011 | YES | 0.50  | 3.72  | - | dowr | - | no |
| chr1  | 227262251 | 227263625 | ENSG00000143776 | CDC42BP  | CDC42 binding pr     | intron  | 0.007 | YES | 0.50  | 3.10  | - | dowr | - | no |
| chr2  | 29092501  | 29093875  | ENSG00000171103 | TRMT61B  | tRNA methyltrans     | 5UTR    | 0.000 | YES | 2.76  | 7.02  | - | dowr | - | no |
| chr2  | 113012001 | 113013375 | ENSG00000144161 | ZC3H8    | zinc finger CCCH-t   | 5UTR    | 0.000 | YES | 4.47  | 5.78  | - | dowr | - | no |
| chr19 | 3762251   | 3763875   | ENSG00000183617 | MRPL54   | mitochondrial rib    | 5UTR    | 0.000 | YES | 4.68  | 6.61  | - | dowr | - | no |
| chr19 | 5622251   | 5623875   | ENSG00000160633 | SAFB     | scaffold attachme    | 5UTR    | 0.000 | YES | 1.98  | 6.61  | - | dowr | - | no |
| chr19 | 40324126  | 40325625  | ENSG00000105202 | FBL      | fibrillarin [Source: | 3UTR    | 0.000 | YES | 2.34  | 5.99  | - | dowr | - | no |
| chr19 | 49587876  | 49589375  | ENSG00000104852 | SNRNP70  | small nuclear ribo   | 5UTR    | 0.000 | YES | 4.54  | 9.50  | - | dowr | - | no |
| chr19 | 50528001  | 50529375  | ENSG00000142528 | ZNF473   | zinc finger proteir  | 5UTR    | 0.000 | YES | 2.20  | 6.40  | - | dowr | - | no |
| chr19 | 50528501  | 50529750  | ENSG00000142528 | ZNF473   | zinc finger proteir  | 5UTR    | 0.014 | YES | 1.84  | 5.99  | - | dowr | - | no |
| chr2  | 197503751 | 197505125 | ENSG00000144395 | CCDC150  | coiled-coil domai    | 5UTR    | 0.000 | YES | 1.98  | 4.13  | - | dowr | - | no |
| chr19 | 59055001  | 59056500  | ENSG00000130726 | TRIM28   | tripartite motif cc  | 5UTR    | 0.000 | YES | 3.19  | 5.99  | - | dowr | - | no |
| chr2  | 242625626 | 242627125 | ENSG00000168393 | DTYMK    | deoxythymidylate     | 5UTR    | 0.000 | YES | 2.84  | 7.02  | - | dowr | - | no |

|       |           |           |                 |           |                          |       |    |      |      |   |      |   |    |
|-------|-----------|-----------|-----------------|-----------|--------------------------|-------|----|------|------|---|------|---|----|
| chr1  | 115314501 | 115315750 | ENSG00000052723 | SIKE1     | suppressor of IKB 3UTR   | 0.034 | NO | 5.46 | 4.13 | - | dowr | - | no |
| chr17 | 38247751  | 38249000  | ENSG00000126351 | THRA      | thyroid hormone 3UTR     | 0.028 | NO | 0.71 | 1.86 | - | dowr | - | no |
| chr20 | 61575376  | 61576750  | ENSG00000101193 | GID8      | GID complex sub1 3UTR    | 0.010 | NO | 0.85 | 2.89 | - | dowr | - | no |
| chr1  | 28831876  | 28833125  | ENSG00000180198 | RCC1      | regulator of chror 5UTR  | 0.015 | NO | 1.49 | 2.68 | - | dowr | - | no |
| chr1  | 33116001  | 33117375  | ENSG00000162521 | RBBP4     | retinoblastoma bi 5UTR   | 0.010 | NO | 1.98 | 2.89 | - | dowr | - | no |
| chr1  | 33937376  | 33938750  | ENSG00000121903 | ZSCAN20   | zinc finger and SC 5UTR  | 0.001 | NO | 1.13 | 3.72 | - | dowr | - | no |
| chr1  | 153939626 | 153941000 | ENSG00000143578 | CREB3L4   | cAMP responsive 5UTR     | 0.001 | NO | 3.40 | 4.54 | - | dowr | - | no |
| chr1  | 154946376 | 154947750 | ENSG00000173207 | CKS1B     | CDC28 protein kir 5UTR   | 0.000 | NO | 3.83 | 7.02 | - | dowr | - | no |
| chr10 | 35415501  | 35416750  | ENSG00000095794 | CREM      | cAMP responsive 5UTR     | 0.002 | NO | 1.13 | 4.34 | - | dowr | - | no |
| chr10 | 105155751 | 105157000 | ENSG00000148843 | PDCD11    | programmed cell 5UTR     | 0.001 | NO | 0.71 | 2.68 | - | dowr | - | no |
| chr10 | 127407501 | 127408750 | ENSG00000107938 | C10orf137 | chromosome 10 c 5UTR     | 0.002 | NO | 1.49 | 4.13 | - | dowr | - | no |
| chr11 | 14912626  | 14913875  | ENSG00000186104 | CYP2R1    | cytochrome P450 5UTR     | 0.012 | NO | 2.20 | 5.16 | - | dowr | - | no |
| chr11 | 14913001  | 14914375  | ENSG00000186104 | CYP2R1    | cytochrome P450 5UTR     | 0.000 | NO | 1.98 | 4.54 | - | dowr | - | no |
| chr12 | 6960626   | 6961875   | ENSG00000111667 | USP5      | ubiquitin specific 5UTR  | 0.008 | NO | 2.20 | 3.92 | - | dowr | - | no |
| chr12 | 69080001  | 69081375  | ENSG00000111581 | NUP107    | nucleoporin 107k 5UTR    | 0.000 | NO | 2.98 | 5.78 | - | dowr | - | no |
| chr12 | 111180126 | 111181375 | ENSG00000186298 | PPP1CC    | protein phosphat 5UTR    | 0.024 | NO | 2.20 | 3.72 | - | dowr | - | no |
| chr13 | 50655751  | 50657000  | ENSG00000176124 | DLEU1     | deleted in lymphc 5UTR   | 0.010 | NO | 1.63 | 2.89 | - | dowr | - | no |
| chr14 | 50086626  | 50088000  | ENSG00000168282 | MGAT2     | mannosyl (alpha- 5UTR    | 0.000 | NO | 2.13 | 4.34 | - | dowr | - | no |
| chr15 | 72409876  | 72411250  | ENSG00000166192 | SENP8     | SUMO/sentrin spi 5UTR    | 0.003 | NO | 2.84 | 4.95 | - | dowr | - | no |
| chr15 | 98503251  | 98504500  | ENSG00000140450 | ARRDC4    | arrestin domain c 5UTR   | 0.048 | NO | 4.11 | 3.30 | - | dowr | - | no |
| chr16 | 67595751  | 67597000  | ENSG00000102974 | CTCF      | CCCTC-binding fa 5UTR    | 0.007 | NO | 1.70 | 4.13 | - | dowr | - | no |
| chr16 | 4896626   | 4898000   | ENSG00000140632 | GLYR1     | glyoxylate reduct: 5UTR  | 0.020 | NO | 2.55 | 5.57 | - | dowr | - | no |
| chr16 | 69759751  | 69761125  | ENSG00000181019 | NQO1      | NAD(P)H dehydro 5UTR     | 0.001 | NO | 2.55 | 3.92 | - | dowr | - | no |
| chr17 | 47865751  | 47867000  | ENSG00000136504 | KAT7      | K(lysine) acetyltra 5UTR | 0.015 | NO | 3.33 | 6.19 | - | dowr | - | no |
| chr17 | 40021126  | 40022375  | ENSG00000178502 | KLHL11    | kelch-like family r 5UTR | 0.023 | NO | 0.64 | 2.68 | - | dowr | - | no |
| chr18 | 12947751  | 12949000  | ENSG00000085415 | SEH1L     | SEH1-like (S. cere 5UTR  | 0.004 | NO | 1.63 | 3.92 | - | dowr | - | no |
| chr18 | 33077001  | 33078250  | ENSG00000153391 | INO80C    | INO80 complex st 5UTR    | 0.005 | NO | 1.84 | 3.72 | - | dowr | - | no |
| chr19 | 8509376   | 8510625   | ENSG00000099783 | HNRNPM    | heterogeneous ni 5UTR    | 0.015 | NO | 1.21 | 3.72 | - | dowr | - | no |
| chr19 | 18433501  | 18434875  | ENSG00000130520 | LSM4      | LSM4 homolog, U 5UTR     | 0.000 | NO | 0.78 | 2.89 | - | dowr | - | no |
| chr19 | 33462501  | 33463750  | ENSG00000121289 | CEP89     | centrosomal prot 5UTR    | 0.049 | NO | 2.13 | 2.89 | - | dowr | - | no |
| chr2  | 47629626  | 47630875  | ENSG00000095002 | MSH2      | mutS homolog 2, 5UTR     | 0.045 | NO | 2.34 | 3.51 | - | dowr | - | no |



|       |           |           |                 |          |                          |       |    |      |      |   |      |   |    |
|-------|-----------|-----------|-----------------|----------|--------------------------|-------|----|------|------|---|------|---|----|
| chr2  | 11605626  | 11607000  | ENSG00000169016 | E2F6     | E2F transcription 5UTR   | 0.000 | NO | 2.27 | 4.54 | - | dowr | - | no |
| chr2  | 38977751  | 38979250  | ENSG00000115875 | SRSF7    | serine/arginine-ri 5UTR  | 0.000 | NO | 7.09 | 6.61 | - | dowr | - | no |
| chr20 | 61568751  | 61570125  | ENSG00000101193 | GID8     | GID complex sub1 5UTR    | 0.005 | NO | 1.91 | 3.92 | - | dowr | - | no |
| chr20 | 61492501  | 61494125  | ENSG00000101190 | TCFL5    | transcription facti 5UTR | 0.003 | NO | 0.92 | 2.06 | - | dowr | - | no |
| chr21 | 34915001  | 34916250  | ENSG00000159140 | SON      | SON DNA binding 5UTR     | 0.011 | NO | 1.63 | 3.72 | - | dowr | - | no |
| chr21 | 46493376  | 46494625  | ENSG00000197381 | ADARB1   | adenosine deamii 5UTR    | 0.020 | NO | 4.11 | 4.34 | - | dowr | - | no |
| chr22 | 41346626  | 41348000  | ENSG00000100387 | RBX1     | ring-box 1, E3 ubi 5UTR  | 0.000 | NO | 2.84 | 3.30 | - | dowr | - | no |
| chr22 | 45559126  | 45560375  | ENSG00000093000 | NUP50    | nucleoporin 50kD 5UTR    | 0.025 | NO | 1.56 | 2.27 | - | dowr | - | no |
| chr22 | 42486251  | 42487625  | ENSG00000184983 | NDUFA6   | NADH dehydroge 5UTR      | 0.000 | NO | 2.13 | 3.51 | - | dowr | - | no |
| chr3  | 63805001  | 63806500  | ENSG00000163632 | C3orf49  | chromosome 3 or 5UTR     | 0.012 | NO | 7.30 | 8.67 | - | dowr | - | no |
| chr3  | 120067751 | 120069000 | ENSG00000163428 | LRRC58   | leucine rich repea 5UTR  | 0.002 | NO | 1.84 | 4.54 | - | dowr | - | no |
| chr3  | 120067251 | 120068500 | ENSG00000163428 | LRRC58   | leucine rich repea 5UTR  | 0.033 | NO | 2.27 | 4.54 | - | dowr | - | no |
| chr4  | 57301876  | 57303125  | ENSG00000128050 | PAICS    | phosphoribosylan 5UTR    | 0.005 | NO | 2.34 | 2.68 | - | dowr | - | no |
| chr4  | 73934876  | 73936250  | ENSG00000163626 | COX18    | cytochrome c oxia 5UTR   | 0.001 | NO | 2.20 | 2.89 | - | dowr | - | no |
| chr4  | 100871001 | 100872250 | ENSG00000164032 | H2AFZ    | H2A histone famil 5UTR   | 0.001 | NO | 1.56 | 2.68 | - | dowr | - | no |
| chr5  | 64858376  | 64859750  | ENSG00000113593 | PPWD1    | peptidylprolyl iso 5UTR  | 0.001 | NO | 1.21 | 4.54 | - | dowr | - | no |
| chr5  | 108084001 | 108085250 | ENSG00000151422 | FER      | fer (fps/fes relate 5UTR | 0.026 | NO | 1.21 | 4.54 | - | dowr | - | no |
| chr5  | 170813876 | 170815375 | ENSG00000181163 | NPM1     | nucleophosmin (r 5UTR    | 0.001 | NO | 4.11 | 4.75 | - | dowr | - | no |
| chr6  | 26155876  | 26157250  | ENSG00000168298 | HIST1H1E | histone cluster 1, 5UTR  | 0.000 | NO | 3.40 | 6.40 | - | dowr | - | no |
| chr6  | 26156501  | 26157750  | ENSG00000168298 | HIST1H1E | histone cluster 1, 5UTR  | 0.022 | NO | 5.25 | 7.64 | - | dowr | - | no |
| chr6  | 30614126  | 30615500  | ENSG00000204564 | C6orf136 | chromosome 6 or 5UTR     | 0.000 | NO | 3.69 | 5.57 | - | dowr | - | no |
| chr6  | 36561501  | 36562750  | ENSG00000112081 | SRSF3    | serine/arginine-ri 5UTR  | 0.000 | NO | 2.48 | 3.10 | - | dowr | - | no |
| chr6  | 13814001  | 13815250  | ENSG00000050393 | MCUR1    | mitochondrial cal 5UTR   | 0.002 | NO | 1.21 | 2.89 | - | dowr | - | no |
| chr6  | 27860251  | 27861625  | ENSG00000233224 | HIST1H2A | histone cluster 1, 5UTR  | 0.039 | NO | 2.34 | 2.48 | - | dowr | - | no |
| chr6  | 160210751 | 160212125 | ENSG00000120438 | TCP1     | t-complex 1 [Sour 5UTR   | 0.012 | NO | 1.49 | 3.51 | - | dowr | - | no |
| chr7  | 77325001  | 77326250  | ENSG00000187257 | RSBN1L   | round spermatid 5UTR     | 0.024 | NO | 1.49 | 2.89 | - | dowr | - | no |
| chr7  | 7680001   | 7681250   | ENSG00000106399 | RPA3     | replication protei 5UTR  | 0.029 | NO | 2.27 | 2.68 | - | dowr | - | no |
| chr7  | 72936001  | 72937250  | ENSG00000009954 | BAZ1B    | bromodomain ad 5UTR      | 0.036 | NO | 1.84 | 2.48 | - | dowr | - | no |
| chr7  | 75367876  | 75369125  | ENSG00000127946 | HIP1     | huntingtin interac 5UTR  | 0.050 | NO | 1.28 | 2.89 | - | dowr | - | no |
| chr8  | 74887751  | 74889000  | ENSG00000175606 | TMEM70   | transmembrane r 5UTR     | 0.008 | NO | 1.56 | 3.51 | - | dowr | - | no |
| chr8  | 92081876  | 92083250  | ENSG00000155100 | OTUD6B   | OTU domain cont 5UTR     | 0.009 | NO | 1.84 | 4.95 | - | dowr | - | no |

|       |           |           |                 |          |                             |          |       |    |      |      |   |      |   |    |
|-------|-----------|-----------|-----------------|----------|-----------------------------|----------|-------|----|------|------|---|------|---|----|
| chr9  | 137000126 | 137001375 | ENSG00000196363 | WDR5     | WD repeat domain            | 5UTR     | 0.003 | NO | 1.70 | 5.99 | - | dowr | - | no |
| chr9  | 100684126 | 100685500 | ENSG00000136932 | C9orf156 | chromosome 9 orf            | 5UTR     | 0.000 | NO | 4.18 | 5.99 | - | dowr | - | no |
| chr9  | 127905251 | 127906500 | ENSG00000173611 | SCAI     | suppressor of cancer        | 5UTR     | 0.026 | NO | 1.91 | 2.89 | - | dowr | - | no |
| chrX  | 46695626  | 46696875  | ENSG00000102218 | RP2      | retinitis pigmentosa        | 5UTR     | 0.048 | NO | 1.42 | 2.89 | - | dowr | - | no |
| chr6  | 30293751  | 30295250  | ENSG00000204599 | TRIM39   | tripartite motif containing | 5UTR     | 0.002 | NO | 2.06 | 4.95 | - | dowr | - | no |
| chr1  | 179561626 | 179562875 | ENSG00000162782 | TDRD5    | tudor domain containing     | exon     | 0.007 | NO | 1.84 | 2.68 | - | dowr | - | no |
| chr10 | 120101126 | 120102500 | ENSG00000165669 | FAM204A  | family with sequence        | exon     | 0.001 | NO | 2.62 | 3.92 | - | dowr | - | no |
| chr15 | 75743626  | 75744875  | ENSG00000169375 | SIN3A    | SIN3 transcription factor   | exon     | 0.000 | NO | 3.83 | 5.57 | - | dowr | - | no |
| chr16 | 74700126  | 74701500  | ENSG00000168411 | RFWD3    | ring finger and WD          | exon     | 0.000 | NO | 4.11 | 4.95 | - | dowr | - | no |
| chr2  | 24269876  | 24271125  | ENSG00000163026 | C2orf44  | chromosome 2 orf            | exon     | 0.028 | NO | 1.49 | 2.89 | - | dowr | - | no |
| chr20 | 10414251  | 10415625  | ENSG00000125863 | MKKS     | McKusick-Kaufmann           | exon     | 0.020 | NO | 2.34 | 4.54 | - | dowr | - | no |
| chr20 | 31573376  | 31574625  | ENSG00000167098 | SUN5     | Sad1 and UNC84              | exon     | 0.008 | NO | 0.85 | 1.86 | - | dowr | - | no |
| chr3  | 63807751  | 63809250  | ENSG00000163632 | C3orf49  | chromosome 3 orf            | exon     | 0.013 | NO | 4.96 | 5.78 | - | dowr | - | no |
| chr4  | 26858626  | 26860000  | ENSG00000109689 | STIM2    | stromal interaction         | exon     | 0.000 | NO | 1.56 | 3.72 | - | dowr | - | no |
| chr6  | 151711251 | 151712625 | ENSG00000181472 | ZBTB2    | zinc finger and BTB         | exon     | 0.000 | NO | 2.27 | 5.16 | - | dowr | - | no |
| chr1  | 174135126 | 174136375 | ENSG00000152061 | RABGAP1L | RAB GTPase activator        | intron   | 0.020 | NO | 1.06 | 2.48 | - | dowr | - | no |
| chr1  | 217811751 | 217813000 | ENSG00000162814 | SPATA17  | spermatogenesis             | intron   | 0.048 | NO | 0.99 | 3.10 | - | dowr | - | no |
| chr11 | 126213751 | 126215000 | ENSG00000110063 | DCPS     | decapping enzyme            | intron   | 0.015 | NO | 0.71 | 2.48 | - | dowr | - | no |
| chr17 | 56795501  | 56796875  | ENSG00000108384 | RAD51C   | RAD51 homolog C             | intron   | 0.004 | NO | 3.76 | 5.37 | - | dowr | - | no |
| chr17 | 57952751  | 57954000  | ENSG00000108423 | TUBD1    | tubulin, delta 1            | intron   | 0.004 | NO | 3.62 | 4.75 | - | dowr | - | no |
| chr20 | 10409251  | 10410500  | ENSG00000125863 | MKKS     | McKusick-Kaufmann           | intron   | 0.046 | NO | 1.21 | 3.10 | - | dowr | - | no |
| chr20 | 10409626  | 10410875  | ENSG00000125863 | MKKS     | McKusick-Kaufmann           | intron   | 0.025 | NO | 1.63 | 3.30 | - | dowr | - | no |
| chr20 | 47264376  | 47265625  | ENSG00000124126 | PREX1    | phosphatidylinositol        | intron   | 0.049 | NO | 3.83 | 5.78 | - | dowr | - | no |
| chr20 | 47386626  | 47387875  | ENSG00000124126 | PREX1    | phosphatidylinositol        | intron   | 0.048 | NO | 6.17 | 7.64 | - | dowr | - | no |
| chr3  | 99749376  | 99750625  | ENSG00000184220 | CMSS1    | cms1 ribosomal              | intron   | 0.011 | NO | 0.50 | 1.86 | - | dowr | - | no |
| chr4  | 184216001 | 184217250 | ENSG00000151718 | WWC2     | WW and C2 domain            | intron   | 0.032 | NO | 1.06 | 1.65 | - | dowr | - | no |
| chr8  | 107446626 | 107447875 | ENSG00000164830 | OXR1     | oxidation resistant         | intron   | 0.011 | NO | 2.13 | 4.13 | - | dowr | - | no |
| chrX  | 132983001 | 132984250 | ENSG00000147257 | GPC3     | glypican 3                  | intron   | 0.017 | NO | 0.99 | 2.27 | - | dowr | - | no |
| chr12 | 46122126  | 46123375  | ENSG00000189079 | ARID2    | AT rich interactive         | promoter | 0.013 | NO | 1.21 | 5.57 | - | dowr | - | no |
| chr12 | 46120751  | 46122000  | ENSG00000189079 | ARID2    | AT rich interactive         | upstream | 0.006 | NO | 2.20 | 4.54 | - | dowr | - | no |
| chr20 | 30004001  | 30005375  | ENSG00000204548 | DEFB121  | defensin, beta 12           | upstream | 0.014 | NO | 0.43 | 1.45 | - | dowr | - | no |

|       |           |           |                 |           |                          |       |     |       |       |   |      |      |     |
|-------|-----------|-----------|-----------------|-----------|--------------------------|-------|-----|-------|-------|---|------|------|-----|
| chr5  | 6712501   | 6714000   | ENSG00000112941 | PAPD7     | PAP associated dc upstre | 0.000 | NO  | 2.13  | 6.19  | - | dowr | -    | no  |
| chr6  | 57490876  | 57492125  | ENSG00000146143 | PRIM2     | primase, DNA, po intron  | 0.019 | YES | 1.84  | 3.30  | - | dowr | -    | na  |
| chr5  | 137673376 | 137674750 | ENSG00000158402 | CDC25C    | cell division cycle 5UTR | 0.001 | NO  | 3.05  | 3.51  | - | dowr | -    | na  |
| chr20 | 3139876   | 3141250   | ENSG00000215251 | FASTKD5   | FAST kinase domæ exon    | 0.006 | NO  | 0.43  | 2.06  | - | dowr | -    | na  |
| chr1  | 57169376  | 57170625  | ENSG00000162409 | PRKAA2    | protein kinase, Al exon  | 0.019 | NO  | 0.28  | 2.27  | - | -    | up   | yes |
| chr3  | 23451001  | 23452250  | ENSG00000182247 | UBE2E2    | ubiquitin-conjuga intron | 0.007 | YES | 1.21  | 2.48  | - | -    | up   | no  |
| chr5  | 130500251 | 130501750 | ENSG00000169567 | HINT1     | histidine triad nur 5UTR | 0.000 | YES | 3.69  | 9.08  | - | -    | up   | no  |
| chrX  | 154443876 | 154445250 | ENSG00000155959 | VBP1      | von Hippel-Lindai 5UTR   | 0.000 | YES | 2.20  | 3.30  | - | -    | up   | no  |
| chr10 | 133794876 | 133796250 | ENSG00000176171 | BNIP3     | BCL2/adenovirus 5UTR     | 0.000 | YES | 2.27  | 6.19  | - | -    | up   | no  |
| chr11 | 59435876  | 59437250  | ENSG00000166889 | PATL1     | protein associater 5UTR  | 0.000 | YES | 2.34  | 3.72  | - | -    | up   | no  |
| chr11 | 62622626  | 62624125  | ENSG00000168003 | SLC3A2    | solute carrier fam 5UTR  | 0.000 | YES | 4.75  | 5.16  | - | -    | up   | no  |
| chr14 | 45552626  | 45554000  | ENSG00000185246 | PRPF39    | PRP39 pre-mRNA 5UTR      | 0.000 | YES | 2.34  | 3.72  | - | -    | up   | no  |
| chr14 | 64108001  | 64109375  | ENSG00000140006 | WDR89     | WD repeat domai exon     | 0.000 | YES | 2.69  | 6.40  | - | -    | up   | no  |
| chr14 | 103799626 | 103801250 | ENSG00000100664 | EIF5      | eukaryotic transla 5UTR  | 0.000 | YES | 5.46  | 8.88  | - | -    | up   | no  |
| chr15 | 50646376  | 50648375  | ENSG00000104064 | GABPB1    | GA binding protei 5UTR   | 0.000 | YES | 11.20 | 17.96 | - | -    | up   | no  |
| chr15 | 72765876  | 72767250  | ENSG00000166233 | ARIH1     | ariadne homolog, 5UTR    | 0.001 | YES | 2.13  | 5.16  | - | -    | up   | no  |
| chr16 | 31884501  | 31885750  | ENSG00000185947 | ZNF267    | zinc finger proteir 5UTR | 0.028 | YES | 1.70  | 2.68  | - | -    | up   | no  |
| chr1  | 157091876 | 157093125 | ENSG00000117036 | ETV3      | ets variant 3 [Sou 3UTR  | 0.021 | NO  | 1.06  | 2.89  | - | -    | up   | no  |
| chr10 | 101189751 | 101191125 | ENSG00000120053 | GOT1      | glutamic-oxaloacæ 5UTR   | 0.001 | NO  | 2.20  | 4.13  | - | -    | up   | no  |
| chr12 | 108955751 | 108957125 | ENSG00000136003 | ISCU      | iron-sulfur cluster 5UTR | 0.000 | NO  | 2.84  | 3.72  | - | -    | up   | no  |
| chr19 | 14628626  | 14629875  | ENSG00000132002 | DNAJB1    | DnaJ (Hsp40) hon 5UTR    | 0.008 | NO  | 0.57  | 2.06  | - | -    | up   | no  |
| chr2  | 99797001  | 99798250  | ENSG00000158411 | MITD1     | MIT, microtubule 5UTR    | 0.001 | NO  | 1.49  | 2.68  | - | -    | up   | no  |
| chr3  | 160282751 | 160284000 | ENSG00000186432 | KPNA4     | karyopherin alphæ 5UTR   | 0.008 | NO  | 3.33  | 3.92  | - | -    | up   | no  |
| chr15 | 50645751  | 50647000  | ENSG00000104064 | GABPB1    | GA binding protei exon   | 0.012 | NO  | 4.61  | 5.99  | - | -    | up   | no  |
| chr15 | 51520126  | 51521375  | ENSG00000137869 | CYP19A1   | cytochrome P450 exon     | 0.045 | NO  | 1.84  | 4.95  | - | -    | up   | no  |
| chr20 | 42838751  | 42840000  | ENSG00000132823 | C20orf111 | chromosome 20 c exon     | 0.030 | NO  | 3.83  | 5.16  | - | -    | up   | no  |
| chr5  | 55290251  | 55291625  | ENSG00000134352 | IL6ST     | interleukin 6 sign: exon | 0.002 | NO  | 1.42  | 3.30  | - | -    | up   | no  |
| chr19 | 33865876  | 33867125  | ENSG00000153879 | CEBPG     | CCAAT/enhancer intron    | 0.035 | NO  | 0.14  | 2.06  | - | -    | up   | no  |
| chr10 | 124638376 | 124640000 | ENSG00000213185 | FAM24B    | family with seque exon   | 0.000 | YES | 4.68  | 15.07 | - | -    | up   | na  |
| chr17 | 73150001  | 73151375  | ENSG00000189159 | HN1       | hematological anæ 5UTR   | 0.004 | YES | 2.76  | 5.16  | - | -    | down | yes |
| chr3  | 14166501  | 14167750  | ENSG00000170876 | TMEM43    | transmembrane ç 5UTR     | 0.032 | YES | 5.25  | 9.70  | - | -    | down | no  |

|       |           |           |                 |         |                                 |       |     |       |       |   |   |      |    |
|-------|-----------|-----------|-----------------|---------|---------------------------------|-------|-----|-------|-------|---|---|------|----|
| chr3  | 62036501  | 62038250  | ENSG00000144724 | PTPRG   | protein tyrosine $\zeta$ intron | 0.000 | YES | 23.89 | 36.54 | - | - | down | no |
| chr5  | 177630876 | 177632250 | ENSG00000197451 | HNRNPAB | heterogeneous nt 5UTR           | 0.000 | YES | 6.03  | 5.37  | - | - | down | no |
| chr16 | 31190751  | 31192125  | ENSG00000089280 | FUS     | fused in sarcoma 5UTR           | 0.000 | YES | 4.32  | 7.64  | - | - | down | no |
| chr16 | 31191251  | 31192500  | ENSG00000089280 | FUS     | fused in sarcoma 5UTR           | 0.016 | YES | 3.47  | 6.61  | - | - | down | no |
| chr2  | 33823501  | 33825125  | ENSG00000119812 | FAM98A  | family with seque 5UTR          | 0.000 | YES | 7.66  | 13.83 | - | - | down | no |
| chr19 | 1604751   | 1606250   | ENSG00000127540 | UQCR11  | ubiquinol-cytochr 5UTR          | 0.000 | YES | 0.92  | 4.54  | - | - | down | no |
| chr19 | 11070626  | 11072125  | ENSG00000127616 | SMARCA4 | SWI/SNF related, 5UTR           | 0.000 | YES | 8.51  | 16.31 | - | - | down | no |
| chr19 | 16582126  | 16583625  | ENSG00000127527 | EPS15L1 | epidermal growth 5UTR           | 0.000 | YES | 1.42  | 5.37  | - | - | down | no |
| chr2  | 170218376 | 170219875 | ENSG00000081479 | LRP2    | low density lipopr 5UTR         | 0.002 | YES | 2.76  | 5.78  | - | - | down | no |
| chr19 | 39137501  | 39139000  | ENSG00000130402 | ACTN4   | actinin, alpha 4 [S 5UTR        | 0.000 | YES | 3.90  | 9.29  | - | - | down | no |
| chr19 | 39138126  | 39139375  | ENSG00000130402 | ACTN4   | actinin, alpha 4 [S 5UTR        | 0.005 | YES | 3.83  | 9.08  | - | - | down | no |
| chr19 | 54605376  | 54606875  | ENSG00000170906 | NDUFA3  | NADH dehydroge 5UTR             | 0.000 | YES | 2.48  | 6.61  | - | - | down | no |
| chr21 | 48054626  | 48056500  | ENSG00000160310 | PRMT2   | protein arginine r 5UTR         | 0.000 | YES | 10.00 | 22.50 | - | - | down | no |
| chr3  | 64636251  | 64638000  | ENSG00000163638 | ADAMTS9 | ADAM metallopej 3UTR            | 0.000 | NO  | 11.98 | 17.96 | - | - | down | no |
| chr3  | 64634751  | 64636000  | ENSG00000163638 | ADAMTS9 | ADAM metallopej 3UTR            | 0.000 | NO  | 12.34 | 12.59 | - | - | down | no |
| chr1  | 10092251  | 10093500  | ENSG00000130939 | UBE4B   | ubiquitination fac 5UTR         | 0.006 | NO  | 0.71  | 2.06  | - | - | down | no |
| chr12 | 122063751 | 122065000 | ENSG00000182500 | ORAI1   | ORAI calcium rele 5UTR          | 0.035 | NO  | 1.06  | 3.10  | - | - | down | no |
| chr19 | 36630251  | 36631500  | ENSG00000126247 | CAPNS1  | calpain, small sub 5UTR         | 0.031 | NO  | 1.77  | 3.30  | - | - | down | no |
| chr19 | 45348876  | 45350125  | ENSG00000130202 | PVRL2   | poliovirus receptc 5UTR         | 0.010 | NO  | 1.21  | 2.68  | - | - | down | no |
| chr2  | 47403001  | 47404375  | ENSG00000143933 | CALM2   | calmodulin 2 (phc 5UTR          | 0.000 | NO  | 3.40  | 5.37  | - | - | down | no |
| chr20 | 62151376  | 62152875  | ENSG00000125534 | PPDPF   | pancreatic proger 5UTR          | 0.000 | NO  | 3.33  | 4.34  | - | - | down | no |
| chr20 | 7999126   | 8000375   | ENSG00000125827 | TMX4    | thioredoxin-relatc 5UTR         | 0.016 | NO  | 1.28  | 3.51  | - | - | down | no |
| chr20 | 24972751  | 24974250  | ENSG00000101474 | APMAP   | adipocyte plasma 5UTR           | 0.000 | NO  | 3.40  | 4.54  | - | - | down | no |
| chr22 | 21996001  | 21997250  | ENSG00000128228 | SDF2L1  | stromal cell-deriv 5UTR         | 0.010 | NO  | 1.84  | 4.13  | - | - | down | no |
| chr3  | 15642501  | 15643750  | ENSG00000169814 | BTD     | biotinidase [Sourc 5UTR         | 0.001 | NO  | 3.33  | 4.34  | - | - | down | no |
| chr7  | 44645876  | 44647125  | ENSG00000105953 | OGDH    | oxoglutarate (alpl 5UTR         | 0.047 | NO  | 2.55  | 3.10  | - | - | down | no |
| chr7  | 73097126  | 73098500  | ENSG00000071462 | WBSCR22 | Williams Beuren s 5UTR          | 0.001 | NO  | 1.56  | 4.13  | - | - | down | no |
| chr7  | 134330751 | 134332125 | ENSG00000172331 | BPGM    | 2,3-bisphosphogh 5UTR           | 0.004 | NO  | 2.62  | 3.30  | - | - | down | no |
| chr7  | 148725001 | 148726375 | ENSG00000155660 | PDIA4   | protein disulfide i 5UTR        | 0.000 | NO  | 2.41  | 4.95  | - | - | down | no |
| chr2  | 11692001  | 11693250  | ENSG00000196208 | GREB1   | growth regulator intron         | 0.014 | NO  | 0.99  | 2.48  | - | - | down | no |
| chr3  | 61946251  | 61947500  | ENSG00000144724 | PTPRG   | protein tyrosine $\zeta$ intron | 0.038 | NO  | 3.90  | 7.84  | - | - | down | no |

|      |          |          |                 |         |                                 |       |    |       |       |   |   |         |
|------|----------|----------|-----------------|---------|---------------------------------|-------|----|-------|-------|---|---|---------|
| chr3 | 61946751 | 61948000 | ENSG00000144724 | PTPRG   | protein tyrosine $\zeta$ intron | 0.005 | NO | 4.75  | 9.08  | - | - | down no |
| chr3 | 62150751 | 62152000 | ENSG00000144724 | PTPRG   | protein tyrosine $\zeta$ intron | 0.019 | NO | 3.90  | 7.02  | - | - | down no |
| chr3 | 61625751 | 61627000 | ENSG00000144724 | PTPRG   | protein tyrosine $\zeta$ intron | 0.001 | NO | 5.18  | 8.05  | - | - | down no |
| chr3 | 61993251 | 61994500 | ENSG00000144724 | PTPRG   | protein tyrosine $\zeta$ intron | 0.006 | NO | 4.54  | 6.81  | - | - | down no |
| chr3 | 61895501 | 61896750 | ENSG00000144724 | PTPRG   | protein tyrosine $\zeta$ intron | 0.007 | NO | 4.32  | 6.19  | - | - | down no |
| chr3 | 62050251 | 62051500 | ENSG00000144724 | PTPRG   | protein tyrosine $\zeta$ intron | 0.007 | NO | 5.18  | 6.40  | - | - | down no |
| chr3 | 61992751 | 61994000 | ENSG00000144724 | PTPRG   | protein tyrosine $\zeta$ intron | 0.020 | NO | 6.10  | 6.61  | - | - | down no |
| chr3 | 61732751 | 61734000 | ENSG00000144724 | PTPRG   | protein tyrosine $\zeta$ intron | 0.009 | NO | 5.10  | 5.16  | - | - | down no |
| chr3 | 64661001 | 64662500 | ENSG00000163638 | ADAMTS9 | ADAM metallopej intron          | 0.002 | NO | 7.59  | 11.97 | - | - | down no |
| chr3 | 64637251 | 64639000 | ENSG00000163638 | ADAMTS9 | ADAM metallopej intron          | 0.000 | NO | 11.70 | 16.51 | - | - | down no |
| chr3 | 64503501 | 64505000 | ENSG00000163638 | ADAMTS9 | ADAM metallopej intron          | 0.001 | NO | 5.67  | 7.84  | - | - | down no |
| chr3 | 64630751 | 64632000 | ENSG00000163638 | ADAMTS9 | ADAM metallopej intron          | 0.041 | NO | 8.72  | 11.15 | - | - | down no |
| chr3 | 64573751 | 64575000 | ENSG00000163638 | ADAMTS9 | ADAM metallopej intron          | 0.000 | NO | 8.44  | 10.73 | - | - | down no |
| chr3 | 64653501 | 64654750 | ENSG00000163638 | ADAMTS9 | ADAM metallopej intron          | 0.039 | NO | 11.13 | 13.83 | - | - | down no |
| chr3 | 64631251 | 64633000 | ENSG00000163638 | ADAMTS9 | ADAM metallopej intron          | 0.002 | NO | 12.26 | 15.07 | - | - | down no |
| chr3 | 64629251 | 64630500 | ENSG00000163638 | ADAMTS9 | ADAM metallopej intron          | 0.001 | NO | 7.09  | 8.67  | - | - | down no |
| chr3 | 64661751 | 64663000 | ENSG00000163638 | ADAMTS9 | ADAM metallopej intron          | 0.015 | NO | 8.51  | 10.32 | - | - | down no |
| chr3 | 64576751 | 64578000 | ENSG00000163638 | ADAMTS9 | ADAM metallopej intron          | 0.027 | NO | 7.80  | 9.29  | - | - | down no |
| chr3 | 64612251 | 64614250 | ENSG00000163638 | ADAMTS9 | ADAM metallopej intron          | 0.004 | NO | 14.67 | 17.34 | - | - | down no |
| chr3 | 64577501 | 64578750 | ENSG00000163638 | ADAMTS9 | ADAM metallopej intron          | 0.000 | NO | 8.93  | 10.32 | - | - | down no |
| chr3 | 64630001 | 64631250 | ENSG00000163638 | ADAMTS9 | ADAM metallopej intron          | 0.000 | NO | 8.22  | 9.50  | - | - | down no |
| chr3 | 64654001 | 64655750 | ENSG00000163638 | ADAMTS9 | ADAM metallopej intron          | 0.001 | NO | 15.24 | 17.34 | - | - | down no |
| chr3 | 64604001 | 64605500 | ENSG00000163638 | ADAMTS9 | ADAM metallopej intron          | 0.049 | NO | 9.29  | 10.12 | - | - | down no |
| chr3 | 64653001 | 64654250 | ENSG00000163638 | ADAMTS9 | ADAM metallopej intron          | 0.002 | NO | 10.99 | 11.35 | - | - | down no |
| chr3 | 64668501 | 64670250 | ENSG00000163638 | ADAMTS9 | ADAM metallopej intron          | 0.011 | NO | 12.55 | 12.80 | - | - | down no |
| chr3 | 64580751 | 64582250 | ENSG00000163638 | ADAMTS9 | ADAM metallopej intron          | 0.002 | NO | 12.26 | 12.39 | - | - | down no |
| chr3 | 64574751 | 64576750 | ENSG00000163638 | ADAMTS9 | ADAM metallopej intron          | 0.012 | NO | 14.82 | 14.86 | - | - | down no |
| chr3 | 64561001 | 64562500 | ENSG00000163638 | ADAMTS9 | ADAM metallopej intron          | 0.001 | NO | 13.33 | 13.21 | - | - | down no |
| chr3 | 64622501 | 64624000 | ENSG00000163638 | ADAMTS9 | ADAM metallopej intron          | 0.001 | NO | 10.92 | 10.73 | - | - | down no |
| chr3 | 64578001 | 64579500 | ENSG00000163638 | ADAMTS9 | ADAM metallopej intron          | 0.035 | NO | 11.56 | 11.35 | - | - | down no |
| chr3 | 64603251 | 64604500 | ENSG00000163638 | ADAMTS9 | ADAM metallopej intron          | 0.016 | NO | 9.07  | 7.43  | - | - | down no |

|       |           |           |                 |               |                                                  |       |     |       |       |   |   |      |     |
|-------|-----------|-----------|-----------------|---------------|--------------------------------------------------|-------|-----|-------|-------|---|---|------|-----|
| chr5  | 177578251 | 177579500 | ENSG00000145912 | NHP2          | NHP2 ribonucleoprotein intron                    | 0.005 | NO  | 3.69  | 4.75  | - | - | down | no  |
| chr17 | 35626376  | 35627625  | ENSG00000132142 | ACACA         | acetyl-CoA carboxylase intron                    | 0.004 | NO  | 0.50  | 2.06  | - | - | down | na  |
| chr4  | 17578376  | 17579750  | ENSG00000002549 | LAP3          | leucine aminopeptidase 5UTR                      | 0.000 | YES | 1.42  | 4.34  | - | - | -    | yes |
| chr6  | 87794501  | 87795750  | ENSG00000135346 | CGA           | glycoprotein hormone 3UTR                        | 0.033 | YES | 0.85  | 1.86  | - | - | -    | yes |
| chrX  | 53110876  | 53112250  | ENSG00000184205 | TSPYL2        | TSPY-like 2 [Source: 5UTR                        | 0.000 | YES | 1.56  | 3.10  | - | - | -    | yes |
| chr16 | 11349376  | 11350750  | ENSG00000185338 | SOCS1         | suppressor of cytokine signaling 5UTR            | 0.000 | YES | 2.34  | 4.54  | - | - | -    | yes |
| chr17 | 57914251  | 57916000  | ENSG00000062716 | VMP1          | vacuole membrane protein exon                    | 0.000 | YES | 25.66 | 34.89 | - | - | -    | yes |
| chr1  | 59249126  | 59250375  | ENSG00000177606 | JUN           | jun proto-oncogene 5UTR                          | 0.002 | YES | 3.12  | 3.51  | - | - | -    | yes |
| chr1  | 150551376 | 150552625 | ENSG00000143384 | MCL1          | myeloid cell leukemia 1 5UTR                     | 0.003 | NO  | 3.33  | 3.72  | - | - | -    | yes |
| chr19 | 13263126  | 13264500  | ENSG00000160888 | IER2          | immediate early response 2 5UTR                  | 0.009 | NO  | 3.26  | 2.68  | - | - | -    | yes |
| chr7  | 100808376 | 100809625 | ENSG00000128564 | VGF           | VGF nerve growth factor exon                     | 0.037 | NO  | 1.56  | 2.89  | - | - | -    | yes |
| chr3  | 9438501   | 9439750   | ENSG00000168137 | SETD5         | SET domain containing 5UTR                       | 0.000 | YES | 6.59  | 11.15 | - | - | -    | no  |
| chr3  | 11313251  | 11314750  | ENSG00000197548 | ATG7          | autophagy related 7 5UTR                         | 0.000 | YES | 3.33  | 7.43  | - | - | -    | no  |
| chr3  | 12525251  | 12526500  | ENSG00000154743 | TSEN2         | tRNA splicing endonuclease 2 5UTR                | 0.000 | YES | 3.33  | 6.81  | - | - | -    | no  |
| chr3  | 14165751  | 14167250  | ENSG00000163528 | CHCHD4        | coiled-coil-helix-coil domain 4 5UTR             | 0.000 | YES | 5.25  | 10.53 | - | - | -    | no  |
| chr3  | 15247001  | 15248250  | ENSG00000131375 | CAPN7         | calpain 7 [Source: 5UTR                          | 0.000 | YES | 4.47  | 6.40  | - | - | -    | no  |
| chr3  | 17783501  | 17785000  | ENSG00000131374 | TBC1D5        | TBC1 domain family member 5 exon                 | 0.001 | YES | 4.18  | 6.61  | - | - | -    | no  |
| chr1  | 77839001  | 77840250  | ENSG00000154027 | AK5           | adenylate kinase 5 intron                        | 0.045 | YES | 0.21  | 1.65  | - | - | -    | no  |
| chr3  | 33478751  | 33480000  | ENSG00000153560 | UBP1          | upstream binding protein intron                  | 0.001 | YES | 2.98  | 3.72  | - | - | -    | no  |
| chr3  | 33839501  | 33840750  | ENSG00000170248 | PDCD6IP       | programmed cell death 6 interacting protein 5UTR | 0.000 | YES | 3.54  | 4.75  | - | - | -    | no  |
| chr3  | 43731751  | 43733000  | ENSG00000011198 | ABHD5         | abhydrolase domain 5UTR                          | 0.000 | YES | 3.47  | 5.99  | - | - | -    | no  |
| chr3  | 46229751  | 46231000  | ENSG00000183625 | CCR3          | chemokine (C-C motif) receptor 3 intron          | 0.002 | YES | 3.47  | 2.89  | - | - | -    | no  |
| chr3  | 47017251  | 47018750  | ENSG00000160799 | CCDC12        | coiled-coil domain containing 12 5UTR            | 0.000 | YES | 6.45  | 15.28 | - | - | -    | no  |
| chr3  | 50376751  | 50378000  | ENSG00000068028 | RASSF1        | Ras association (Raf) domain containing 1 exon   | 0.025 | YES | 0.85  | 2.06  | - | - | -    | no  |
| chr3  | 63416251  | 63417500  | ENSG00000163630 | SYNPR         | synaptophysin [Source: 5UTR                      | 0.000 | YES | 2.84  | 5.16  | - | - | -    | no  |
| chr3  | 76566501  | 76567750  | ENSG00000185008 | ROBO2         | roundabout, axon guidance protein 2 intron       | 0.044 | YES | 0.43  | 2.48  | - | - | -    | no  |
| chr3  | 85768751  | 85770000  | ENSG00000175161 | CADM2         | cell adhesion molecule 2 intron                  | 0.045 | YES | 0.85  | 2.06  | - | - | -    | no  |
| chr3  | 112574376 | 112575750 | ENSG00000206531 | CD200R1L      | CD200 receptor 1 upstream region                 | 0.011 | YES | 0.78  | 2.89  | - | - | -    | no  |
| chr3  | 117347501 | 117348750 | ENSG00000185565 | LSAMP         | limbic system-associated protein intron          | 0.001 | YES | 1.84  | 3.30  | - | - | -    | no  |
| chr1  | 16161626  | 16163250  | ENSG00000179743 | RP11-169K16.9 | exon                                             | 0.000 | YES | 7.23  | 11.56 | - | - | -    | no  |
| chr3  | 124869001 | 124870250 | ENSG00000221955 | SLC12A8       | solute carrier family 12 member 8 exon           | 0.001 | YES | 0.85  | 3.10  | - | - | -    | no  |

|      |           |           |                 |          |                            |       |     |       |       |   |   |   |    |
|------|-----------|-----------|-----------------|----------|----------------------------|-------|-----|-------|-------|---|---|---|----|
| chr3 | 127309251 | 127310500 | ENSG00000163870 | TPRA1    | transmembrane p exon       | 0.028 | YES | 2.06  | 5.99  | - | - | - | no |
| chr3 | 135914251 | 135916250 | ENSG00000174579 | MSL2     | male-specific leth 5UTR    | 0.000 | YES | 6.52  | 17.55 | - | - | - | no |
| chr3 | 150320501 | 150321750 | ENSG00000198843 | SELT     | Selenoprotein T [ 5UTR     | 0.000 | YES | 3.54  | 6.19  | - | - | - | no |
| chr3 | 182833251 | 182834750 | ENSG00000078070 | MCCC1    | methylcrotonoyl- exon      | 0.000 | YES | 1.84  | 5.57  | - | - | - | no |
| chr3 | 183903001 | 183904500 | ENSG00000161204 | ABCF3    | ATP-binding casse 5UTR     | 0.000 | YES | 5.53  | 13.42 | - | - | - | no |
| chr3 | 184031751 | 184033000 | ENSG00000114867 | EIF4G1   | eukaryotic transla 5UTR    | 0.000 | YES | 1.42  | 4.75  | - | - | - | no |
| chr3 | 184278751 | 184280250 | ENSG00000182580 | EPHB3    | EPH receptor B3 [ 5UTR     | 0.002 | YES | 2.69  | 5.16  | - | - | - | no |
| chr4 | 330876    | 332250    | ENSG00000131127 | ZNF141   | zinc finger proteir 5UTR   | 0.000 | YES | 0.85  | 3.51  | - | - | - | no |
| chr4 | 40212876  | 40214375  | ENSG00000168421 | RHOH     | ras homolog fami exon      | 0.000 | YES | 1.28  | 3.72  | - | - | - | no |
| chr4 | 46109751  | 46111000  | ENSG00000163285 | GABRG1   | gamma-aminobut intron      | 0.039 | YES | 0.35  | 2.48  | - | - | - | no |
| chr4 | 47117626  | 47119000  | ENSG00000163288 | GABRB1   | gamma-aminobut intron      | 0.040 | YES | 0.35  | 2.68  | - | - | - | no |
| chr4 | 54243126  | 54244500  | ENSG00000145216 | FIP1L1   | FIP1 like 1 (S. cere 5UTR  | 0.000 | YES | 3.54  | 4.34  | - | - | - | no |
| chr4 | 92393501  | 92394750  | ENSG00000184305 | CCSER1   | coiled-coil serine- intron | 0.006 | YES | 0.50  | 2.68  | - | - | - | no |
| chr4 | 109751126 | 109752500 | ENSG00000188517 | COL25A1  | collagen, type XX\ intron  | 0.009 | YES | 0.43  | 2.48  | - | - | - | no |
| chr5 | 52404876  | 52406375  | ENSG00000164172 | MOCS2    | molybdenum cof: 5UTR       | 0.000 | YES | 2.34  | 6.81  | - | - | - | no |
| chr5 | 74632376  | 74633750  | ENSG00000113161 | HMGCR    | 3-hydroxy-3-metf 5UTR      | 0.000 | YES | 2.98  | 6.40  | - | - | - | no |
| chr5 | 77589876  | 77591250  | ENSG00000132842 | AP3B1    | adaptor-related p 5UTR     | 0.000 | YES | 3.69  | 7.84  | - | - | - | no |
| chr5 | 90678501  | 90679875  | ENSG00000113369 | ARRDC3   | arrestin domain c 5UTR     | 0.000 | YES | 6.10  | 7.02  | - | - | - | no |
| chr5 | 98108626  | 98110000  | ENSG00000174136 | RGMB     | RGM domain fam 5UTR        | 0.000 | YES | 1.35  | 4.54  | - | - | - | no |
| chr5 | 121779126 | 121780500 | ENSG00000064692 | SNCAIP   | synuclein, alpha ii 3UTR   | 0.031 | YES | 0.64  | 3.30  | - | - | - | no |
| chr5 | 148930376 | 148931875 | ENSG00000113712 | CSNK1A1  | casein kinase 1, a\ 5UTR   | 0.000 | YES | 1.84  | 8.46  | - | - | - | no |
| chr5 | 151150501 | 151152250 | ENSG00000145907 | G3BP1    | GTPase activating 5UTR     | 0.000 | YES | 4.47  | 9.29  | - | - | - | no |
| chr5 | 173422501 | 173423750 | ENSG00000185056 | C5orf47  | chromosome 5 of intron     | 0.041 | YES | 0.71  | 2.68  | - | - | - | no |
| chr5 | 179049751 | 179051500 | ENSG00000169045 | HNRNPH1  | heterogeneous n\ 5UTR      | 0.000 | YES | 12.26 | 26.84 | - | - | - | no |
| chr5 | 179104876 | 179106375 | ENSG00000127022 | CANX     | calnexin [Source:l 5UTR    | 0.000 | YES | 5.81  | 13.83 | - | - | - | no |
| chr5 | 179340376 | 179341750 | ENSG00000197226 | TBC1D9B  | TBC1 domain fam upstre     | 0.000 | YES | 1.77  | 4.95  | - | - | - | no |
| chr6 | 13328001  | 13329375  | ENSG00000145979 | TBC1D7   | TBC1 domain fam exon       | 0.000 | YES | 1.91  | 3.72  | - | - | - | no |
| chr6 | 24402376  | 24403875  | ENSG00000124532 | MRS2     | MRS2 magnesium 5UTR        | 0.000 | YES | 1.70  | 5.78  | - | - | - | no |
| chr6 | 24666376  | 24667875  | ENSG00000111802 | TDP2     | tyrosyl-DNA phos 5UTR      | 0.000 | YES | 2.76  | 5.16  | - | - | - | no |
| chr6 | 26216501  | 26217875  | ENSG00000187990 | HIST1H2B | histone cluster 1, 5UTR    | 0.000 | YES | 2.76  | 4.54  | - | - | - | no |
| chr6 | 32939251  | 32940750  | ENSG00000204256 | BRD2     | bromodomain coi 5UTR       | 0.000 | YES | 5.46  | 6.61  | - | - | - | no |

|      |           |           |                 |            |                             |       |     |       |       |   |   |   |    |
|------|-----------|-----------|-----------------|------------|-----------------------------|-------|-----|-------|-------|---|---|---|----|
| chr6 | 35226626  | 35228250  | ENSG00000065029 | ZNF76      | zinc finger proteir 5UTR    | 0.000 | YES | 17.79 | 28.07 | - | - | - | no |
| chr6 | 122720001 | 122721375 | ENSG00000025156 | HSF2       | heat shock transc 5UTR      | 0.000 | YES | 1.35  | 3.92  | - | - | - | no |
| chr6 | 133135001 | 133136375 | ENSG00000112306 | RPS12      | ribosomal proteir 5UTR      | 0.000 | YES | 2.62  | 4.13  | - | - | - | no |
| chr7 | 4680751   | 4682250   | ENSG00000164916 | FOXK1      | forkhead box K1 [upstre     | 0.000 | YES | 4.61  | 7.23  | - | - | - | no |
| chr7 | 5229126   | 5230625   | ENSG00000157954 | WIPI2      | WD repeat domai 5UTR        | 0.000 | YES | 2.41  | 10.32 | - | - | - | no |
| chr7 | 6387876   | 6389375   | ENSG00000178397 | FAM220A    | family with seque exon      | 0.000 | YES | 5.03  | 11.56 | - | - | - | no |
| chr7 | 6486876   | 6488375   | ENSG00000164535 | DAGLB      | diacylglycerol lipa 5UTR    | 0.000 | YES | 3.62  | 7.84  | - | - | - | no |
| chr7 | 6745876   | 6747250   | ENSG00000164631 | ZNF12      | zinc finger proteir exon    | 0.000 | YES | 3.12  | 4.95  | - | - | - | no |
| chr7 | 11012751  | 11014125  | ENSG00000106443 | PHF14      | PHD finger protei 5UTR      | 0.000 | YES | 2.06  | 3.72  | - | - | - | no |
| chr7 | 12250126  | 12251500  | ENSG00000106460 | TMEM106    | transmembrane p 5UTR        | 0.000 | YES | 1.56  | 5.16  | - | - | - | no |
| chr7 | 44887251  | 44888625  | ENSG00000105968 | H2AFV      | H2A histone famil 5UTR      | 0.000 | YES | 2.34  | 3.92  | - | - | - | no |
| chr7 | 56131251  | 56132625  | ENSG00000129103 | SUMF2      | sulfatase modifyir 5UTR     | 0.000 | YES | 2.34  | 5.57  | - | - | - | no |
| chr1 | 17231001  | 17232375  | ENSG00000058453 | CROCC      | ciliary rootlet coil intron | 0.003 | YES | 3.90  | 3.10  | - | - | - | no |
| chr7 | 99745751  | 99747125  | ENSG00000188186 | LAMTOR4    | late endosomal/l 5UTR       | 0.003 | YES | 1.21  | 4.13  | - | - | - | no |
| chr7 | 100895001 | 100896375 | ENSG00000214253 | FIS1       | fission 1 (mitocho 5UTR     | 0.007 | YES | 0.92  | 2.48  | - | - | - | no |
| chr7 | 116501876 | 116503250 | ENSG00000198898 | CAPZA2     | capping protein ( 5UTR      | 0.000 | YES | 1.21  | 4.75  | - | - | - | no |
| chr7 | 133398251 | 133399625 | ENSG00000131558 | EXOC4      | exocyst complex c intron    | 0.014 | YES | 0.57  | 2.48  | - | - | - | no |
| chr7 | 142984626 | 142986250 | ENSG00000106144 | CASP2      | caspase 2, apoptc 5UTR      | 0.000 | YES | 3.90  | 12.59 | - | - | - | no |
| chr7 | 156432501 | 156434125 | ENSG00000105982 | RNF32      | ring finger proteir 5UTR    | 0.000 | YES | 4.25  | 10.94 | - | - | - | no |
| chr7 | 158648501 | 158650000 | ENSG00000126870 | WDR60      | WD repeat domai 5UTR        | 0.000 | YES | 3.19  | 7.23  | - | - | - | no |
| chrX | 23361001  | 23362250  | ENSG00000165186 | PTCHD1     | patched domain c intron     | 0.032 | YES | 1.42  | 2.48  | - | - | - | no |
| chrX | 24209751  | 24211000  | ENSG00000005889 | ZFX        | zinc finger proteir intron  | 0.049 | YES | 0.50  | 2.06  | - | - | - | no |
| chrX | 47077501  | 47078875  | ENSG00000102225 | CDK16      | cyclin-dependent 5UTR       | 0.000 | YES | 1.42  | 4.34  | - | - | - | no |
| chrX | 48455751  | 48457250  | ENSG00000101940 | WDR13      | WD repeat domai 5UTR        | 0.000 | YES | 3.12  | 7.23  | - | - | - | no |
| chrX | 48534126  | 48535500  | ENSG00000015285 | WAS        | Wiskott-Aldrich sy 5UTR     | 0.000 | YES | 1.42  | 3.92  | - | - | - | no |
| chrX | 49643126  | 49644500  | ENSG00000234390 | AF238380.5 | exon                        | 0.000 | YES | 1.84  | 4.54  | - | - | - | no |
| chrX | 63425626  | 63427000  | ENSG00000184675 | AMER1      | APC membrane r 5UTR         | 0.000 | YES | 1.42  | 2.89  | - | - | - | no |
| chrX | 70287501  | 70289125  | ENSG00000147164 | SNX12      | sorting nexin 12 [ 5UTR     | 0.000 | YES | 17.37 | 31.58 | - | - | - | no |
| chrX | 123695001 | 123696250 | ENSG00000009694 | TENM1      | teneurin transme exon       | 0.002 | YES | 0.71  | 2.48  | - | - | - | no |
| chrX | 153626001 | 153627500 | ENSG00000147403 | RPL10      | ribosomal proteir 5UTR      | 0.000 | YES | 4.82  | 6.40  | - | - | - | no |
| chr8 | 23103251  | 23104750  | ENSG00000147457 | CHMP7      | charged multivesi 5UTR      | 0.000 | YES | 2.62  | 6.61  | - | - | - | no |



|       |           |           |                 |          |                     |        |       |     |       |       |   |   |   |    |
|-------|-----------|-----------|-----------------|----------|---------------------|--------|-------|-----|-------|-------|---|---|---|----|
| chr8  | 109449876 | 109451125 | ENSG00000104408 | EIF3E    | eukaryotic transla  | upstre | 0.046 | YES | 1.21  | 2.48  | - | - | - | no |
| chr8  | 142010751 | 142012250 | ENSG00000169398 | PTK2     | protein tyrosine k  | exon   | 0.000 | YES | 3.12  | 8.67  | - | - | - | no |
| chr8  | 145136751 | 145138125 | ENSG00000197858 | GPAA1    | glycosylphosphati   | 5UTR   | 0.000 | YES | 1.91  | 4.75  | - | - | - | no |
| chr8  | 146017126 | 146018500 | ENSG00000161016 | RPL8     | ribosomal protein   | 5UTR   | 0.000 | YES | 3.69  | 6.61  | - | - | - | no |
| chr9  | 36400501  | 36402000  | ENSG00000137075 | RNF38    | ring finger protein | exon   | 0.000 | YES | 3.97  | 7.43  | - | - | - | no |
| chr9  | 71394251  | 71395625  | ENSG00000187866 | FAM122A  | family with seque   | 5UTR   | 0.001 | YES | 2.84  | 5.37  | - | - | - | no |
| chr9  | 79791751  | 79793125  | ENSG00000197969 | VPS13A   | vacuolar protein    | 5UTR   | 0.000 | YES | 3.19  | 8.67  | - | - | - | no |
| chr9  | 116138501 | 116139875 | ENSG00000119431 | HDHD3    | haloacid dehaloge   | exon   | 0.000 | YES | 1.63  | 3.92  | - | - | - | no |
| chr9  | 124921376 | 124922750 | ENSG00000185681 | MORN5    | MORN repeat cor     | 5UTR   | 0.000 | YES | 2.48  | 6.61  | - | - | - | no |
| chr9  | 130829126 | 130830375 | ENSG00000171169 | NAIF1    | nuclear apoptosis   | 5UTR   | 0.000 | YES | 4.61  | 5.99  | - | - | - | no |
| chr9  | 131485751 | 131487250 | ENSG00000160446 | ZDHHC12  | zinc finger, DHHC   | 5UTR   | 0.000 | YES | 3.12  | 7.43  | - | - | - | no |
| chr9  | 140082376 | 140083875 | ENSG00000176101 | SSNA1    | Sjogren syndrome    | 5UTR   | 0.000 | YES | 3.33  | 5.16  | - | - | - | no |
| chr9  | 140512626 | 140514000 | ENSG00000181090 | EHMT1    | euchromatic histc   | 5UTR   | 0.000 | YES | 4.82  | 7.43  | - | - | - | no |
| chr10 | 6130126   | 6131625   | ENSG00000134453 | RBM17    | RNA binding moti    | 5UTR   | 0.000 | YES | 3.47  | 9.50  | - | - | - | no |
| chr10 | 22907001  | 22908250  | ENSG00000150867 | PIP4K2A  | phosphatidylinosi   | intron | 0.007 | YES | 1.49  | 2.68  | - | - | - | no |
| chr10 | 89621501  | 89623000  | ENSG00000171862 | PTEN     | phosphatase and     | 5UTR   | 0.000 | YES | 2.13  | 6.19  | - | - | - | no |
| chr10 | 103577501 | 103578875 | ENSG00000198408 | MGEA5    | meningioma expr     | 5UTR   | 0.000 | YES | 3.26  | 5.78  | - | - | - | no |
| chr10 | 124713251 | 124714625 | ENSG00000119965 | C10orf88 | chromosome 10 c     | 5UTR   | 0.000 | YES | 4.68  | 9.29  | - | - | - | no |
| chr11 | 47663501  | 47665000  | ENSG00000109919 | MTCH2    | mitochondrial car   | 5UTR   | 0.000 | YES | 3.19  | 9.08  | - | - | - | no |
| chr11 | 62420126  | 62421500  | ENSG00000185085 | INTS5    | integrator comple   | 5UTR   | 0.000 | YES | 2.48  | 5.37  | - | - | - | no |
| chr11 | 63952501  | 63954250  | ENSG00000168439 | STIP1    | stress-induced-ph   | 5UTR   | 0.000 | YES | 9.43  | 8.26  | - | - | - | no |
| chr11 | 64072251  | 64073625  | ENSG00000173153 | ESRRA    | estrogen-related    | 5UTR   | 0.000 | YES | 0.85  | 4.75  | - | - | - | no |
| chr11 | 64645376  | 64646750  | ENSG00000110047 | EHD1     | EH-domain conta     | 5UTR   | 0.000 | YES | 1.98  | 5.37  | - | - | - | no |
| chr11 | 65100626  | 65102125  | ENSG00000133884 | DPF2     | D4, zinc and doub   | 5UTR   | 0.000 | YES | 2.91  | 5.16  | - | - | - | no |
| chr11 | 66055876  | 66057375  | ENSG00000174851 | YIF1A    | Yip1 interacting f  | 5UTR   | 0.000 | YES | 4.04  | 5.57  | - | - | - | no |
| chr11 | 66188501  | 66190000  | ENSG00000174576 | NPAS4    | neuronal PAS don    | 5UTR   | 0.000 | YES | 6.24  | 6.19  | - | - | - | no |
| chr11 | 67980626  | 67982250  | ENSG00000110066 | SUV420H1 | suppressor of var   | exon   | 0.000 | YES | 4.40  | 11.77 | - | - | - | no |
| chr11 | 70048501  | 70050125  | ENSG00000168040 | FADD     | Fas (TNFRSF6)-as    | 5UTR   | 0.000 | YES | 4.11  | 9.91  | - | - | - | no |
| chr11 | 118306001 | 118307875 | ENSG00000118058 | MLL      | myeloid/lymphoir    | 5UTR   | 0.000 | YES | 39.49 | 91.24 | - | - | - | no |
| chr12 | 41901876  | 41903125  | ENSG00000165966 | PDZRN4   | PDZ domain cont     | intron | 0.021 | YES | 0.78  | 2.27  | - | - | - | no |
| chr12 | 49075376  | 49076750  | ENSG00000139620 | KANSL2   | KAT8 regulatory     | 5UTR   | 0.000 | YES | 2.55  | 4.54  | - | - | - | no |

|       |           |           |                 |         |                                 |       |     |      |       |   |   |   |    |
|-------|-----------|-----------|-----------------|---------|---------------------------------|-------|-----|------|-------|---|---|---|----|
| chr12 | 49961001  | 49962375  | ENSG00000110844 | PRPF40B | PRP40 pre-mRNA 5UTR             | 0.000 | YES | 7.02 | 9.70  | - | - | - | no |
| chr12 | 56367001  | 56368500  | ENSG00000111540 | RAB5B   | RAB5B, member F 5UTR            | 0.000 | YES | 5.95 | 8.46  | - | - | - | no |
| chr12 | 57039376  | 57040750  | ENSG00000110955 | ATP5B   | ATP synthase, H+ 5UTR           | 0.000 | YES | 3.83 | 4.95  | - | - | - | no |
| chr12 | 62489376  | 62490625  | ENSG00000198673 | FAM19A2 | family with seque intron        | 0.006 | YES | 1.06 | 2.48  | - | - | - | no |
| chr12 | 64845251  | 64846625  | ENSG00000183735 | TBK1    | TANK-binding kin: 5UTR          | 0.000 | YES | 4.11 | 7.64  | - | - | - | no |
| chr12 | 69861376  | 69862750  | ENSG00000166225 | FRS2    | fibroblast growth upstre        | 0.000 | YES | 2.06 | 4.13  | - | - | - | no |
| chr12 | 82096876  | 82098125  | ENSG00000139220 | PPFIA2  | protein tyrosine $\zeta$ intron | 0.017 | YES | 0.92 | 3.10  | - | - | - | no |
| chr12 | 109250876 | 109252250 | ENSG00000084112 | SSH1    | slingshot protein 5UTR          | 0.001 | YES | 0.57 | 3.30  | - | - | - | no |
| chr12 | 120638126 | 120639625 | ENSG00000089157 | RPLP0   | ribosomal protein 5UTR          | 0.000 | YES | 4.32 | 5.37  | - | - | - | no |
| chr12 | 125398501 | 125400000 | ENSG00000150991 | UBC     | ubiquitin C [Sourc 5UTR         | 0.000 | YES | 5.46 | 7.84  | - | - | - | no |
| chr12 | 132568126 | 132569625 | ENSG00000185684 | EP400NL | EP400 N-terminal 5UTR           | 0.000 | YES | 4.61 | 9.70  | - | - | - | no |
| chr13 | 20595126  | 20596500  | ENSG00000121741 | ZMYM2   | zinc finger, MYM- intron        | 0.015 | YES | 0.92 | 2.48  | - | - | - | no |
| chr13 | 21347126  | 21348875  | ENSG00000150456 | N6AMT2  | N-6 adenine-spec exon           | 0.000 | YES | 7.09 | 16.93 | - | - | - | no |
| chr1  | 21765876  | 21767250  | ENSG00000142794 | NBPF3   | neuroblastoma br 5UTR           | 0.000 | YES | 0.71 | 2.48  | - | - | - | no |
| chr13 | 43987626  | 43988875  | ENSG00000120658 | ENOX1   | ecto-NOX disulfid intron        | 0.023 | YES | 1.13 | 3.30  | - | - | - | no |
| chr13 | 111364626 | 111366125 | ENSG00000153487 | ING1    | inhibitor of growt 5UTR         | 0.000 | YES | 3.76 | 6.61  | - | - | - | no |
| chr14 | 39643626  | 39645000  | ENSG00000100941 | PNN     | pinin, desmosom: 5UTR           | 0.000 | YES | 3.33 | 4.54  | - | - | - | no |
| chr14 | 51706251  | 51707750  | ENSG00000139921 | TMX1    | thioredoxin-relate 5UTR         | 0.000 | YES | 3.19 | 6.81  | - | - | - | no |
| chr14 | 67826376  | 67827750  | ENSG00000100554 | ATP6V1D | ATPase, H+ trans $\zeta$ 5UTR   | 0.000 | YES | 3.62 | 8.05  | - | - | - | no |
| chr14 | 73392501  | 73393875  | ENSG00000119599 | DCAF4   | DDB1 and CUL4 a 5UTR            | 0.000 | YES | 3.12 | 6.81  | - | - | - | no |
| chr14 | 81686626  | 81688000  | ENSG00000165417 | GTF2A1  | general transcript 5UTR         | 0.000 | YES | 2.91 | 6.40  | - | - | - | no |
| chr14 | 81999501  | 82000875  | ENSG00000071537 | SEL1L   | sel-1 suppressor $\zeta$ 5UTR   | 0.001 | YES | 2.06 | 4.34  | - | - | - | no |
| chr14 | 89028626  | 89030000  | ENSG00000100722 | ZC3H14  | zinc finger CCCH-t 5UTR         | 0.000 | YES | 2.20 | 4.13  | - | - | - | no |
| chr14 | 90862626  | 90864125  | ENSG00000198668 | CALM1   | calmodulin 1 (phc 5UTR          | 0.000 | YES | 3.97 | 8.26  | - | - | - | no |
| chr14 | 96968001  | 96969375  | ENSG00000090060 | PAPOLA  | poly(A) polymera: 5UTR          | 0.000 | YES | 3.54 | 6.40  | - | - | - | no |
| chr15 | 41951876  | 41953250  | ENSG00000174197 | MGA     | MGA, MAX dimer 5UTR             | 0.000 | YES | 1.63 | 5.37  | - | - | - | no |
| chr15 | 51286126  | 51287375  | ENSG00000081014 | AP4E1   | adaptor-related p intron        | 0.001 | YES | 1.98 | 3.92  | - | - | - | no |
| chr15 | 53864376  | 53865625  | ENSG00000166415 | WDR72   | WD repeat domai intron          | 0.007 | YES | 0.64 | 3.72  | - | - | - | no |
| chr15 | 54331126  | 54332375  | ENSG00000137766 | UNC13C  | unc-13 homolog $\zeta$ intron   | 0.048 | YES | 2.62 | 2.68  | - | - | - | no |
| chr15 | 54555751  | 54557125  | ENSG00000137766 | UNC13C  | unc-13 homolog $\zeta$ exon     | 0.013 | YES | 1.13 | 3.30  | - | - | - | no |
| chr15 | 54821626  | 54822875  | ENSG00000137766 | UNC13C  | unc-13 homolog $\zeta$ intron   | 0.037 | YES | 0.78 | 2.27  | - | - | - | no |

|       |           |           |                 |          |                           |       |     |       |       |   |   |   |    |
|-------|-----------|-----------|-----------------|----------|---------------------------|-------|-----|-------|-------|---|---|---|----|
| chr15 | 56210626  | 56211875  | ENSG00000069869 | NEDD4    | neural precursor intron   | 0.017 | YES | 0.92  | 2.48  | - | - | - | no |
| chr15 | 68936001  | 68937375  | ENSG00000103647 | CORO2B   | coronin, actin bin intron | 0.001 | YES | 0.92  | 3.10  | - | - | - | no |
| chr15 | 72564376  | 72565875  | ENSG00000137817 | PARP6    | poly (ADP-ribose) exon    | 0.000 | YES | 2.27  | 7.84  | - | - | - | no |
| chr15 | 86867376  | 86868625  | ENSG00000166748 | AGBL1    | ATP/GTP binding intron    | 0.032 | YES | 0.64  | 3.30  | - | - | - | no |
| chr15 | 87325501  | 87326750  | ENSG00000166748 | AGBL1    | ATP/GTP binding intron    | 0.008 | YES | 1.06  | 2.89  | - | - | - | no |
| chr15 | 100077126 | 100078375 | ENSG00000068305 | MEF2A    | myocyte enhance intron    | 0.001 | YES | 0.64  | 2.68  | - | - | - | no |
| chr16 | 188001    | 189500    | ENSG00000103148 | NPRL3    | nitrogen permeas 5UTR     | 0.000 | YES | 3.83  | 8.67  | - | - | - | no |
| chr16 | 1727501   | 1728875   | ENSG00000206053 | HN1L     | hematological an 5UTR     | 0.000 | YES | 3.76  | 5.78  | - | - | - | no |
| chr16 | 2204626   | 2206000   | ENSG00000131653 | TRAF7    | TNF receptor-assc 5UTR    | 0.000 | YES | 4.11  | 7.02  | - | - | - | no |
| chr16 | 2254876   | 2256500   | ENSG00000167965 | MLST8    | MTOR associated 5UTR      | 0.000 | YES | 11.27 | 22.71 | - | - | - | no |
| chr16 | 2581376   | 2582750   | ENSG00000205923 | CEMP1    | cementum protei 5UTR      | 0.000 | YES | 2.34  | 4.54  | - | - | - | no |
| chr16 | 3073001   | 3075125   | ENSG00000103145 | HCFC1R1  | host cell factor C15UTR   | 0.000 | YES | 5.95  | 14.86 | - | - | - | no |
| chr16 | 3660501   | 3661750   | ENSG00000213918 | DNASE1   | deoxyribonucleas 5UTR     | 0.015 | YES | 3.62  | 8.26  | - | - | - | no |
| chr16 | 3660876   | 3662375   | ENSG00000213918 | DNASE1   | deoxyribonucleas 5UTR     | 0.000 | YES | 4.47  | 9.50  | - | - | - | no |
| chr16 | 4474751   | 4476625   | ENSG00000103423 | DNAJA3   | DnaJ (Hsp40) hon 5UTR     | 0.000 | YES | 13.54 | 30.55 | - | - | - | no |
| chr16 | 8714876   | 8716250   | ENSG00000067365 | METTL22  | methyltransferas 5UTR     | 0.000 | YES | 2.76  | 6.19  | - | - | - | no |
| chr16 | 9184626   | 9186250   | ENSG00000182831 | C16orf72 | chromosome 16 c 5UTR      | 0.000 | YES | 2.55  | 8.67  | - | - | - | no |
| chr16 | 11944751  | 11946125  | ENSG00000171490 | RSL1D1   | ribosomal L1 dom 5UTR     | 0.000 | YES | 3.19  | 6.19  | - | - | - | no |
| chr16 | 14164251  | 14165625  | ENSG00000186260 | MKL2     | MKL/myocardin-li 5UTR     | 0.000 | YES | 1.35  | 5.57  | - | - | - | no |
| chr16 | 15981751  | 15983125  | ENSG00000133393 | FOPNL    | FGFR1OP N-termi 5UTR      | 0.000 | YES | 3.26  | 4.34  | - | - | - | no |
| chr16 | 27214376  | 27216000  | ENSG00000155666 | KDM8     | lysine (K)-specific 5UTR  | 0.000 | YES | 6.17  | 13.42 | - | - | - | no |
| chr16 | 27560626  | 27562000  | ENSG00000047578 | KIAA0556 | KIAA0556 [Source 5UTR     | 0.000 | YES | 2.41  | 5.37  | - | - | - | no |
| chr16 | 28564876  | 28566250  | ENSG00000176476 | CCDC101  | coiled-coil domai 5UTR    | 0.000 | YES | 1.91  | 4.95  | - | - | - | no |
| chr16 | 28833501  | 28835000  | ENSG00000168488 | ATXN2L   | ataxin 2-like [Sou 5UTR   | 0.001 | YES | 4.11  | 6.40  | - | - | - | no |
| chr16 | 29936876  | 29938250  | ENSG00000174943 | KCTD13   | potassium chann 5UTR      | 0.000 | YES | 4.40  | 7.23  | - | - | - | no |
| chr16 | 30621001  | 30622375  | ENSG00000156853 | ZNF689   | zinc finger proteir 5UTR  | 0.000 | YES | 2.27  | 4.95  | - | - | - | no |
| chr16 | 31470626  | 31472000  | ENSG00000140691 | ARMC5    | armadillo repeat 5UTR     | 0.000 | YES | 2.41  | 4.95  | - | - | - | no |
| chr16 | 67062126  | 67063500  | ENSG00000067955 | CBFB     | core-binding fact 5UTR    | 0.001 | YES | 1.42  | 4.54  | - | - | - | no |
| chr16 | 67850001  | 67851375  | ENSG00000102904 | TSNAXIP1 | translin-associate intron | 0.000 | YES | 3.19  | 5.78  | - | - | - | no |
| chr16 | 69788251  | 69789625  | ENSG00000141101 | NOB1     | NIN1/RPN12 bind 5UTR      | 0.000 | YES | 2.69  | 5.37  | - | - | - | no |
| chr16 | 75680876  | 75682375  | ENSG00000166848 | TERF2IP  | telomeric repeat 5UTR     | 0.000 | YES | 3.33  | 8.46  | - | - | - | no |

|       |          |          |                 |          |                            |       |     |       |       |   |   |   |    |
|-------|----------|----------|-----------------|----------|----------------------------|-------|-----|-------|-------|---|---|---|----|
| chr1  | 24968876 | 24970375 | ENSG00000133226 | SRRM1    | serine/arginine re5UTR     | 0.000 | YES | 3.76  | 7.64  | - | - | - | no |
| chr16 | 86588126 | 86589625 | ENSG00000103248 | MTHFSD   | methenyltetrahydc5UTR      | 0.000 | YES | 5.81  | 10.73 | - | - | - | no |
| chr16 | 89574126 | 89575500 | ENSG00000197912 | SPG7     | spastic paraplegia5UTR     | 0.000 | YES | 2.98  | 8.46  | - | - | - | no |
| chr17 | 3571251  | 3572750  | ENSG00000127774 | EMC6     | ER membrane prc5UTR        | 0.000 | YES | 3.76  | 8.26  | - | - | - | no |
| chr17 | 7517626  | 7519250  | ENSG00000129245 | FXR2     | fragile X mental r5UTR     | 0.002 | YES | 1.35  | 6.40  | - | - | - | no |
| chr17 | 8102876  | 8104250  | ENSG00000196544 | C17orf59 | chromosome 17 cupstre      | 0.000 | YES | 2.13  | 3.30  | - | - | - | no |
| chr17 | 8338251  | 8339750  | ENSG00000166579 | NDEL1    | nudE nuclear disti5UTR     | 0.000 | YES | 2.76  | 6.81  | - | - | - | no |
| chr17 | 17739001 | 17740375 | ENSG00000072310 | SREBF1   | sterol regulatory r5UTR    | 0.001 | YES | 1.49  | 4.95  | - | - | - | no |
| chr17 | 18086376 | 18087750 | ENSG00000091542 | ALKBH5   | alkB, alkylation re5UTR    | 0.003 | YES | 2.20  | 5.16  | - | - | - | no |
| chr17 | 26367626 | 26369375 | ENSG00000087095 | NLK      | nemo-like kinase 5UTR      | 0.000 | YES | 3.05  | 5.78  | - | - | - | no |
| chr17 | 27169126 | 27170625 | ENSG00000173065 | FAM222B  | family with seque exon     | 0.000 | YES | 4.61  | 12.59 | - | - | - | no |
| chr17 | 27277751 | 27279500 | ENSG00000109118 | PHF12    | PHD finger protei5UTR      | 0.000 | YES | 17.86 | 40.46 | - | - | - | no |
| chr17 | 34135876 | 34137125 | ENSG00000172660 | TAF15    | TAF15 RNA polym5UTR        | 0.002 | YES | 0.92  | 3.72  | - | - | - | no |
| chr17 | 46178251 | 46179500 | ENSG00000108468 | CBX1     | chromobox homc exon        | 0.003 | YES | 1.77  | 4.95  | - | - | - | no |
| chr1  | 1259376  | 1260750  | ENSG00000224051 | GLTPD1   | glycolipid transfer5UTR    | 0.008 | YES | 1.13  | 2.89  | - | - | - | no |
| chr17 | 56084001 | 56085250 | ENSG00000136450 | SRSF1    | serine/arginine-ri5UTR     | 0.002 | YES | 6.38  | 8.46  | - | - | - | no |
| chr17 | 56594751 | 56596125 | ENSG00000108389 | MTMR4    | myotubularin rel exon      | 0.013 | YES | 5.10  | 9.70  | - | - | - | no |
| chr17 | 57155376 | 57156625 | ENSG00000108395 | TRIM37   | tripartite motif cc intron | 0.039 | YES | 9.15  | 8.46  | - | - | - | no |
| chr17 | 57183626 | 57185000 | ENSG00000108395 | TRIM37   | tripartite motif cc5UTR    | 0.000 | YES | 33.74 | 58.21 | - | - | - | no |
| chr17 | 57696626 | 57697875 | ENSG00000141367 | CLTC     | clathrin, heavy ch5UTR     | 0.001 | YES | 8.29  | 12.59 | - | - | - | no |
| chr17 | 57758626 | 57759875 | ENSG00000141367 | CLTC     | clathrin, heavy ch exon    | 0.000 | YES | 1.13  | 4.54  | - | - | - | no |
| chr17 | 57969251 | 57971375 | ENSG00000108443 | RPS6KB1  | ribosomal proteir5UTR      | 0.000 | YES | 59.90 | ####  | - | - | - | no |
| chr17 | 58554126 | 58555375 | ENSG00000062725 | APPBP2   | amyloid beta prec exon     | 0.027 | YES | 6.45  | 7.64  | - | - | - | no |
| chr17 | 58676876 | 58678250 | ENSG00000170836 | PPM1D    | protein phosphat5UTR       | 0.000 | YES | 26.87 | 46.03 | - | - | - | no |
| chr1  | 25573251 | 25574750 | ENSG00000117616 | C1orf63  | chromosome 1 of5UTR        | 0.000 | YES | 5.10  | 9.08  | - | - | - | no |
| chr17 | 59949626 | 59951000 | ENSG00000108506 | INTS2    | integrator comple exon     | 0.003 | YES | 15.74 | 17.55 | - | - | - | no |
| chr17 | 60004751 | 60006000 | ENSG00000108506 | INTS2    | integrator comple5UTR      | 0.006 | YES | 5.81  | 8.05  | - | - | - | no |
| chr17 | 60080626 | 60082000 | ENSG00000108510 | MED13    | mediator comple intron     | 0.001 | YES | 12.83 | 12.59 | - | - | - | no |
| chr17 | 66243376 | 66244875 | ENSG00000196704 | AMZ2     | archaelysin family5UTR     | 0.000 | YES | 5.60  | 11.56 | - | - | - | no |
| chr17 | 73775126 | 73776375 | ENSG00000132475 | H3F3B    | H3 histone, famil5UTR      | 0.002 | YES | 4.54  | 5.57  | - | - | - | no |
| chr17 | 75276751 | 75278125 | ENSG00000184640 | SEPT9    | septin 9 [Source:5UTR      | 0.000 | YES | 4.61  | 6.81  | - | - | - | no |

|       |           |           |                 |          |                                          |       |     |       |       |   |   |   |    |
|-------|-----------|-----------|-----------------|----------|------------------------------------------|-------|-----|-------|-------|---|---|---|----|
| chr17 | 79030251  | 79031625  | ENSG00000175866 | BAIAP2   | BAI1-associated p5UTR                    | 0.005 | YES | 2.76  | 3.30  | - | - | - | no |
| chr17 | 79828626  | 79830000  | ENSG00000141522 | ARHGDI1  | Rho GDP dissociation                     | 0.002 | YES | 2.20  | 4.95  | - | - | - | no |
| chr17 | 79848876  | 79850125  | ENSG00000141552 | ANAPC11  | anaphase promoting 5UTR                  | 0.043 | YES | 1.63  | 4.13  | - | - | - | no |
| chr18 | 10525126  | 10526625  | ENSG00000134265 | NAPG     | N-ethylmaleimide 5UTR                    | 0.000 | YES | 3.54  | 5.78  | - | - | - | no |
| chr20 | 3184251   | 3185875   | ENSG00000198171 | DDRKG1   | DDRKG domain c 5UTR                      | 0.000 | YES | 3.97  | 7.84  | - | - | - | no |
| chr20 | 3826751   | 3828125   | ENSG00000088888 | MAVS     | mitochondrial anti 5UTR                  | 0.000 | YES | 1.35  | 5.16  | - | - | - | no |
| chr1  | 28099001  | 28100375  | ENSG00000117758 | STX12    | syntaxin 12 [Source 5UTR                 | 0.001 | YES | 1.70  | 3.92  | - | - | - | no |
| chr1  | 28969001  | 28970250  | ENSG00000120656 | TAF12    | TAF12 RNA polymerase exon                | 0.001 | YES | 1.42  | 3.92  | - | - | - | no |
| chr1  | 114968001 | 114969375 | ENSG00000197323 | TRIM33   | tripartite motif c exon                  | 0.000 | YES | 6.03  | 9.08  | - | - | - | no |
| chr1  | 32478376  | 32480375  | ENSG00000121774 | KHDRBS1  | KH domain containing 5UTR                | 0.000 | YES | 8.44  | 22.71 | - | - | - | no |
| chr20 | 13055626  | 13057125  | ENSG00000172296 | SPTLC3   | serine palmitoyltransferase intron       | 0.001 | YES | 1.06  | 2.48  | - | - | - | no |
| chr20 | 14050626  | 14052125  | ENSG00000172264 | MACROD2  | MACRO domain containing intron           | 0.001 | YES | 1.06  | 2.48  | - | - | - | no |
| chr1  | 151253876 | 151255375 | ENSG00000143373 | ZNF687   | zinc finger protein 687 5UTR             | 0.000 | YES | 9.36  | 14.24 | - | - | - | no |
| chr1  | 35733501  | 35735000  | ENSG00000146463 | ZMYM4    | zinc finger, MYM- 5UTR                   | 0.000 | YES | 3.69  | 8.26  | - | - | - | no |
| chr1  | 155657876 | 155659250 | ENSG00000132676 | DAP3     | death associated protein 3 5UTR          | 0.000 | YES | 1.42  | 3.92  | - | - | - | no |
| chr20 | 25603876  | 25605375  | ENSG00000170191 | NANP     | N-acetylneuraminidase 5UTR               | 0.000 | YES | 3.05  | 7.23  | - | - | - | no |
| chr20 | 30539126  | 30540625  | ENSG00000088356 | PDRG1    | p53 and DNA-damage 5UTR                  | 0.000 | YES | 4.96  | 11.35 | - | - | - | no |
| chr1  | 167189126 | 167190625 | ENSG00000143190 | POU2F1   | POU class 2 homeobox 1 5UTR              | 0.000 | YES | 7.80  | 13.62 | - | - | - | no |
| chr20 | 34041876  | 34043375  | ENSG00000126001 | CEP250   | centrosomal protein 250 5UTR             | 0.000 | YES | 2.27  | 5.37  | - | - | - | no |
| chr20 | 37100751  | 37102125  | ENSG00000170471 | RALGAPB  | Ral GTPase activating protein 5UTR       | 0.003 | YES | 2.76  | 4.54  | - | - | - | no |
| chr1  | 176176001 | 176177500 | ENSG00000143207 | RFWD2    | ring finger and WD domain 5UTR           | 0.000 | YES | 3.40  | 7.23  | - | - | - | no |
| chr20 | 39656751  | 39658125  | ENSG00000198900 | TOP1     | topoisomerase (DNA) 5UTR                 | 0.003 | YES | 8.65  | 14.86 | - | - | - | no |
| chr1  | 42921501  | 42922875  | ENSG00000127125 | PPCS     | phosphopantothine synthase 5UTR          | 0.000 | YES | 3.05  | 5.99  | - | - | - | no |
| chr20 | 44485376  | 44486750  | ENSG00000101473 | ACOT8    | acyl-CoA thioesterase 8 5UTR             | 0.000 | YES | 3.62  | 6.81  | - | - | - | no |
| chr20 | 44562501  | 44564625  | ENSG00000100982 | PCIF1    | PDX1 C-terminal interacting 5UTR         | 0.000 | YES | 11.63 | 20.02 | - | - | - | no |
| chr1  | 201404251 | 201405625 | ENSG00000159173 | TNNI1    | troponin I type 1 (muscle) upstream 5UTR | 0.005 | YES | 2.41  | 3.92  | - | - | - | no |
| chr1  | 202857501 | 202859125 | ENSG00000183155 | RABIF    | RAB interacting factor 5UTR              | 0.000 | YES | 6.24  | 15.28 | - | - | - | no |
| chr20 | 47565751  | 47567250  | ENSG00000124198 | ARFGEF2  | ADP-ribosylation factor 2 intron         | 0.000 | YES | 1.77  | 4.95  | - | - | - | no |
| chr1  | 45139376  | 45140750  | ENSG00000198520 | C1orf228 | chromosome 1 open reading frame 228 5UTR | 0.000 | YES | 1.63  | 3.92  | - | - | - | no |
| chr1  | 216296751 | 216298000 | ENSG00000042781 | USH2A    | Usher syndrome type 2 intron             | 0.012 | YES | 1.91  | 2.68  | - | - | - | no |
| chr1  | 231472876 | 231474375 | ENSG00000116903 | EXOC8    | exocyst complex component 8 5UTR         | 0.000 | YES | 10.14 | 18.58 | - | - | - | no |

|       |           |           |                 |            |                                 |       |     |       |       |   |   |   |    |
|-------|-----------|-----------|-----------------|------------|---------------------------------|-------|-----|-------|-------|---|---|---|----|
| chr1  | 45986876  | 45988250  | ENSG00000117450 | PRDX1      | peroxiredoxin 1 [5' exon        | 0.000 | YES | 2.34  | 4.95  | - | - | - | no |
| chr1  | 246169751 | 246171000 | ENSG00000185420 | SMYD3      | SET and MYND domain intron      | 0.049 | YES | 0.50  | 1.65  | - | - | - | no |
| chr2  | 264126    | 265625    | ENSG00000143727 | ACP1       | acid phosphatase 5UTR           | 0.000 | YES | 4.68  | 11.97 | - | - | - | no |
| chr2  | 20550001  | 20551500  | ENSG00000055917 | PUM2       | pumilio homolog exon            | 0.000 | YES | 3.76  | 10.32 | - | - | - | no |
| chr2  | 26100751  | 26102250  | ENSG00000143970 | ASXL2      | additional sex combs 5UTR       | 0.000 | YES | 1.77  | 5.99  | - | - | - | no |
| chr2  | 26256251  | 26257625  | ENSG00000084733 | RAB10      | RAB10, member F 5UTR            | 0.000 | YES | 2.62  | 4.95  | - | - | - | no |
| chr1  | 46768376  | 46769625  | ENSG00000173660 | UQCRH      | ubiquinol-cytochrome c 5UTR     | 0.001 | YES | 0.78  | 3.72  | - | - | - | no |
| chr2  | 26568001  | 26569625  | ENSG00000173567 | GPR113     | G protein-coupled receptor 5UTR | 0.000 | YES | 6.03  | 12.39 | - | - | - | no |
| chr2  | 28973751  | 28975375  | ENSG00000213639 | PPP1CB     | protein phosphatase 5UTR        | 0.000 | YES | 3.33  | 11.15 | - | - | - | no |
| chr2  | 29116751  | 29118125  | ENSG00000163811 | WDR43      | WD repeat domain 5UTR           | 0.000 | YES | 1.91  | 3.72  | - | - | - | no |
| chr2  | 32287876  | 32289250  | ENSG00000021574 | SPAST      | spastin [Source:HGSC] 5UTR      | 0.000 | YES | 1.70  | 5.57  | - | - | - | no |
| chr2  | 70475126  | 70476500  | ENSG00000116001 | TIA1       | TIA1 cytotoxic granule 5UTR     | 0.000 | YES | 2.62  | 5.37  | - | - | - | no |
| chr20 | 57555376  | 57557000  | ENSG00000101158 | NELFCD     | negative elongation factor 5UTR | 0.000 | YES | 2.69  | 6.61  | - | - | - | no |
| chr2  | 98261626  | 98263125  | ENSG00000135940 | COX5B      | cytochrome c oxidase 5UTR       | 0.000 | YES | 2.76  | 4.13  | - | - | - | no |
| chr20 | 60640376  | 60641875  | ENSG00000130699 | TAF4       | TAF4 RNA polymerase II exon     | 0.000 | YES | 2.48  | 6.81  | - | - | - | no |
| chr20 | 60641126  | 60642500  | ENSG00000130699 | TAF4       | TAF4 RNA polymerase II promoter | 0.017 | YES | 2.76  | 7.02  | - | - | - | no |
| chr2  | 128458376 | 128459750 | ENSG00000173349 | SFT2D3     | SFT2 domain containing 5UTR     | 0.000 | YES | 3.62  | 4.75  | - | - | - | no |
| chr19 | 1204876   | 1206375   | ENSG00000118046 | STK11      | serine/threonine kinase 5UTR    | 0.000 | YES | 1.42  | 4.54  | - | - | - | no |
| chr19 | 1406626   | 1408000   | ENSG00000071626 | DAZAP1     | DAZ associated protein 5UTR     | 0.002 | YES | 0.64  | 2.89  | - | - | - | no |
| chr19 | 2327876   | 2329375   | ENSG00000130332 | LSM7       | LSM7 homolog, U5 snRNP 5UTR     | 0.000 | YES | 2.62  | 8.46  | - | - | - | no |
| chr19 | 4342126   | 4343625   | ENSG00000008382 | MPND       | MPN domain containing 5UTR      | 0.000 | YES | 3.69  | 6.81  | - | - | - | no |
| chr19 | 4342876   | 4344125   | ENSG00000008382 | MPND       | MPN domain containing 5UTR      | 0.020 | YES | 3.05  | 5.99  | - | - | - | no |
| chr19 | 5689376   | 5691000   | ENSG00000130255 | RPL36      | ribosomal protein L36 5UTR      | 0.000 | YES | 2.20  | 7.02  | - | - | - | no |
| chr19 | 5719876   | 5721375   | ENSG00000174898 | CATSPERD   | catsper channel alpha 5UTR      | 0.000 | YES | 3.40  | 5.37  | - | - | - | no |
| chr19 | 5977376   | 5979125   | ENSG00000031823 | RANBP3     | RAN binding protein 5UTR        | 0.000 | YES | 5.32  | 10.53 | - | - | - | no |
| chr19 | 6198751   | 6200500   | ENSG00000087903 | RFX2       | regulatory factor X2 exon       | 0.000 | YES | 12.05 | 31.58 | - | - | - | no |
| chr19 | 6372001   | 6373375   | ENSG00000125652 | ALKBH7     | alkB, alkylation repair 5UTR    | 0.005 | YES | 1.77  | 3.30  | - | - | - | no |
| chr19 | 11669376  | 11670875  | ENSG00000198551 | ZNF627     | zinc finger protein 627 5UTR    | 0.000 | YES | 1.98  | 7.43  | - | - | - | no |
| chr19 | 13055876  | 13057375  | ENSG00000179262 | RAD23A     | RAD23 homolog A 5UTR            | 0.000 | YES | 2.41  | 5.16  | - | - | - | no |
| chr19 | 18058126  | 18059500  | ENSG00000105642 | CTB-52I2.8 | upstream open reading frame     | 0.004 | YES | 3.40  | 3.51  | - | - | - | no |
| chr19 | 18303126  | 18304375  | ENSG00000254858 | MPV17L2    | MPV17 mitochondrial 5UTR        | 0.000 | YES | 1.91  | 3.10  | - | - | - | no |

|       |           |           |                 |         |                              |       |     |       |       |   |   |   |    |
|-------|-----------|-----------|-----------------|---------|------------------------------|-------|-----|-------|-------|---|---|---|----|
| chr19 | 19143626  | 19145250  | ENSG00000105676 | ARMC6   | armadillo repeat (5UTR       | 0.000 | YES | 5.10  | 9.50  | - | - | - | no |
| chr2  | 169548501 | 169549750 | ENSG00000172292 | CERS6   | ceramide synthas intron      | 0.035 | YES | 0.99  | 4.13  | - | - | - | no |
| chr19 | 35614751  | 35616250  | ENSG00000153902 | LGI4    | leucine-rich repeat 3UTR     | 0.000 | YES | 3.69  | 8.88  | - | - | - | no |
| chr19 | 39339376  | 39341375  | ENSG00000104824 | HNRNPL  | heterogeneous nt 5UTR        | 0.000 | YES | 7.80  | 16.51 | - | - | - | no |
| chr19 | 39340501  | 39341875  | ENSG00000104824 | HNRNPL  | heterogeneous nt 5UTR        | 0.000 | YES | 5.88  | 8.46  | - | - | - | no |
| chr19 | 40022751  | 40024250  | ENSG00000176401 | EID2B   | EP300 interacting 5UTR       | 0.000 | YES | 3.90  | 8.67  | - | - | - | no |
| chr19 | 40931126  | 40932625  | ENSG00000197019 | SERTAD1 | SERTA domain co 5UTR         | 0.000 | YES | 2.20  | 4.75  | - | - | - | no |
| chr19 | 41769501  | 41770875  | ENSG00000105323 | HNRNPUL | heterogeneous nt 5UTR        | 0.000 | YES | 4.18  | 5.57  | - | - | - | no |
| chr19 | 45873251  | 45874625  | ENSG00000104884 | ERCC2   | excision repair cr 5UTR      | 0.000 | YES | 1.56  | 2.68  | - | - | - | no |
| chr19 | 46087001  | 46088625  | ENSG00000125741 | OPA3    | optic atrophy 3 (a 5UTR      | 0.000 | YES | 4.04  | 6.40  | - | - | - | no |
| chr19 | 46405251  | 46406875  | ENSG00000176182 | MYPOP   | Myb-related tran:exon        | 0.000 | YES | 4.89  | 11.97 | - | - | - | no |
| chr19 | 47363001  | 47364500  | ENSG00000042753 | AP2S1   | adaptor-related pupstre 5UTR | 0.000 | YES | 2.41  | 6.19  | - | - | - | no |
| chr19 | 49217001  | 49218500  | ENSG00000176909 | MAMSTR  | MEF2 activating nexon        | 0.000 | YES | 2.34  | 4.54  | - | - | - | no |
| chr19 | 50179376  | 50181000  | ENSG00000126457 | PRMT1   | protein arginine r 5UTR      | 0.000 | YES | 2.62  | 5.78  | - | - | - | no |
| chr19 | 50886751  | 50888250  | ENSG00000062822 | POLD1   | polymerase (DNA 5UTR         | 0.000 | YES | 1.63  | 3.72  | - | - | - | no |
| chr19 | 54640251  | 54641625  | ENSG00000088038 | CNOT3   | CCR4-NOT transcr 5UTR        | 0.000 | YES | 3.33  | 5.57  | - | - | - | no |
| chr19 | 54662876  | 54664500  | ENSG00000105617 | LENG1   | leukocyte receptc 5UTR       | 0.000 | YES | 2.27  | 5.78  | - | - | - | no |
| chr19 | 55769626  | 55771375  | ENSG00000105063 | PPP6R1  | protein phosphat exon        | 0.000 | YES | 4.54  | 11.97 | - | - | - | no |
| chr22 | 21270876  | 21272375  | ENSG00000099942 | CRKL    | v-crk sarcoma viri 5UTR      | 0.000 | YES | 1.42  | 5.99  | - | - | - | no |
| chr22 | 21355376  | 21357125  | ENSG00000184436 | THAP7   | THAP domain con 5UTR         | 0.000 | YES | 2.20  | 6.61  | - | - | - | no |
| chr22 | 24199251  | 24200750  | ENSG00000133460 | SLC2A11 | solute carrier fam 5UTR      | 0.000 | YES | 4.40  | 9.08  | - | - | - | no |
| chr22 | 28314501  | 28316125  | ENSG00000180957 | PITPNB  | phosphatidylinosi 5UTR       | 0.000 | YES | 5.60  | 12.39 | - | - | - | no |
| chr22 | 37171501  | 37172875  | ENSG00000100360 | IFT27   | intraflagellar tran 5UTR     | 0.000 | YES | 2.13  | 3.51  | - | - | - | no |
| chr22 | 39915876  | 39917125  | ENSG00000128272 | ATF4    | activating transcri 5UTR     | 0.000 | YES | 1.63  | 4.54  | - | - | - | no |
| chr22 | 41696876  | 41698125  | ENSG00000100403 | ZC3H7B  | zinc finger CCCH-t 5UTR      | 0.003 | YES | 0.92  | 2.27  | - | - | - | no |
| chr22 | 41842126  | 41843625  | ENSG00000183864 | TOB2    | transducer of ERB exon       | 0.000 | YES | 2.84  | 6.40  | - | - | - | no |
| chr2  | 216973251 | 216974750 | ENSG00000079246 | XRCC5   | X-ray repair comp 5UTR       | 0.000 | YES | 8.22  | 17.34 | - | - | - | no |
| chr21 | 30256876  | 30258500  | ENSG00000156239 | N6AMT1  | N-6 adenine-spec 5UTR        | 0.000 | YES | 11.56 | 25.60 | - | - | - | no |
| chr2  | 216978876 | 216980250 | ENSG00000079246 | XRCC5   | X-ray repair comp intron     | 0.000 | YES | 3.26  | 4.54  | - | - | - | no |
| chr21 | 35747001  | 35748500  | ENSG00000205670 | SMIM11  | small integral mei 5UTR      | 0.000 | YES | 6.66  | 15.28 | - | - | - | no |
| chr21 | 40720501  | 40721875  | ENSG00000205581 | HMG1    | high mobility gro 5UTR       | 0.000 | YES | 2.34  | 5.99  | - | - | - | no |

|       |           |           |                 |          |                              |      |       |     |       |       |   |   |   |    |
|-------|-----------|-----------|-----------------|----------|------------------------------|------|-------|-----|-------|-------|---|---|---|----|
| chr21 | 44298626  | 44299875  | ENSG00000160193 | WDR4     | WD repeat domain             | 5UTR | 0.027 | YES | 8.86  | 12.80 | - | - | - | no |
| chr21 | 44299001  | 44300500  | ENSG00000160193 | WDR4     | WD repeat domain             | 5UTR | 0.000 | YES | 8.79  | 12.59 | - | - | - | no |
| chr21 | 45552751  | 45554250  | ENSG00000160221 | C21orf33 | chromosome 21 centromere     | 5UTR | 0.000 | YES | 6.17  | 11.35 | - | - | - | no |
| chr2  | 224773251 | 224774625 | ENSG00000085449 | WDFY1    | WD repeat and FY intron      | 5UTR | 0.000 | YES | 2.91  | 5.16  | - | - | - | no |
| chr2  | 233414626 | 233416000 | ENSG00000221944 | TIGD1    | tigger transposon            | 5UTR | 0.000 | YES | 1.91  | 3.92  | - | - | - | no |
| chr2  | 242254501 | 242255875 | ENSG00000168385 | SEPT2    | septin 2 [Source:HGSC        | 5UTR | 0.000 | YES | 3.47  | 7.84  | - | - | - | no |
| chr1  | 108677751 | 108679000 | ENSG00000085491 | SLC25A24 | solute carrier family 24     | 3UTR | 0.007 | NO  | 1.98  | 3.92  | - | - | - | no |
| chr1  | 114305751 | 114307125 | ENSG00000081019 | RSBN1    | round spermatid protein      | 3UTR | 0.006 | NO  | 3.54  | 5.99  | - | - | - | no |
| chr1  | 114436501 | 114437875 | ENSG00000134262 | AP4B1    | adaptor-related protein      | 3UTR | 0.009 | NO  | 4.25  | 6.40  | - | - | - | no |
| chr1  | 114437251 | 114438500 | ENSG00000134262 | AP4B1    | adaptor-related protein      | 3UTR | 0.043 | NO  | 5.18  | 6.61  | - | - | - | no |
| chr1  | 114935376 | 114936625 | ENSG00000197323 | TRIM33   | tripartite motif class       | 3UTR | 0.042 | NO  | 3.47  | 6.40  | - | - | - | no |
| chr1  | 114938876 | 114940125 | ENSG00000197323 | TRIM33   | tripartite motif class       | 3UTR | 0.040 | NO  | 5.81  | 4.13  | - | - | - | no |
| chr1  | 118419126 | 118420500 | ENSG00000196505 | GDAP2    | ganglioside inducible        | 3UTR | 0.004 | NO  | 1.63  | 3.72  | - | - | - | no |
| chr1  | 145012751 | 145014000 | ENSG00000178104 | PDE4DIP  | phosphodiesterase            | 3UTR | 0.008 | NO  | 4.18  | 4.95  | - | - | - | no |
| chr1  | 150669126 | 150670625 | ENSG00000143452 | HORMAD1  | HORMA domain                 | 3UTR | 0.000 | NO  | 3.12  | 4.95  | - | - | - | no |
| chr10 | 75571126  | 75572375  | ENSG00000148660 | CAMK2G   | calcium/calmodulin           | 3UTR | 0.001 | NO  | 0.99  | 3.30  | - | - | - | no |
| chr11 | 61730251  | 61731500  | ENSG00000167995 | BEST1    | bestrophin 1 [Source:HGSC    | 3UTR | 0.046 | NO  | 2.41  | 4.34  | - | - | - | no |
| chr11 | 120200501 | 120201750 | ENSG00000181264 | TMEM136  | transmembrane protein        | 3UTR | 0.017 | NO  | 0.64  | 3.10  | - | - | - | no |
| chr16 | 3077626   | 3078875   | ENSG00000131652 | THOC6    | THO complex 6 homolog        | 3UTR | 0.014 | NO  | 2.55  | 4.54  | - | - | - | no |
| chr16 | 72046751  | 72048125  | ENSG00000102967 | DHODH    | dihydroorotate dehydrogenase | 3UTR | 0.027 | NO  | 1.70  | 3.10  | - | - | - | no |
| chr16 | 89761751  | 89763000  | ENSG00000185324 | CDK10    | cyclin-dependent kinase      | 3UTR | 0.004 | NO  | 2.34  | 3.51  | - | - | - | no |
| chr17 | 57060126  | 57061375  | ENSG00000108395 | TRIM37   | tripartite motif class       | 3UTR | 0.001 | NO  | 10.07 | 12.80 | - | - | - | no |
| chr19 | 19647626  | 19648875  | ENSG00000250067 | YJEFN3   | YjeF N-terminal domain       | 3UTR | 0.010 | NO  | 0.50  | 2.27  | - | - | - | no |
| chr19 | 39125376  | 39126625  | ENSG00000178982 | EIF3K    | eukaryotic translation       | 3UTR | 0.039 | NO  | 0.85  | 2.06  | - | - | - | no |
| chr19 | 49653001  | 49654375  | ENSG00000177380 | PPFIA3   | protein tyrosine phosphatase | 3UTR | 0.001 | NO  | 1.21  | 3.30  | - | - | - | no |
| chr19 | 51227626  | 51229000  | ENSG00000105472 | CLEC11A  | C-type lectin domain         | 3UTR | 0.026 | NO  | 1.42  | 2.48  | - | - | - | no |
| chr19 | 52448626  | 52449875  | ENSG00000176024 | ZNF613   | zinc finger protein          | 3UTR | 0.041 | NO  | 0.71  | 1.86  | - | - | - | no |
| chr20 | 46284251  | 46285625  | ENSG00000124151 | NCOA3    | nuclear receptor corepressor | 3UTR | 0.000 | NO  | 11.63 | 13.01 | - | - | - | no |
| chr20 | 46284876  | 46286125  | ENSG00000124151 | NCOA3    | nuclear receptor corepressor | 3UTR | 0.047 | NO  | 11.20 | 9.91  | - | - | - | no |
| chr20 | 53266876  | 53268125  | ENSG00000101134 | DOK5     | docking protein 5            | 3UTR | 0.017 | NO  | 11.77 | 12.39 | - | - | - | no |
| chr20 | 25056751  | 25058125  | ENSG00000100987 | VSX1     | visual system homeobox       | 3UTR | 0.000 | NO  | 1.84  | 2.68  | - | - | - | no |



|       |           |           |                 |          |                     |      |       |    |       |       |   |   |   |    |
|-------|-----------|-----------|-----------------|----------|---------------------|------|-------|----|-------|-------|---|---|---|----|
| chr20 | 34292126  | 34293500  | ENSG00000131051 | RBM39    | RNA binding moti    | 3UTR | 0.035 | NO | 0.64  | 1.65  | - | - | - | no |
| chr20 | 40125001  | 40126375  | ENSG00000124177 | CHD6     | chromodomain h      | 3UTR | 0.010 | NO | 2.91  | 3.30  | - | - | - | no |
| chr3  | 7731876   | 7733125   | ENSG00000196277 | GRM7     | glutamate recepti   | 3UTR | 0.024 | NO | 0.99  | 3.10  | - | - | - | no |
| chr3  | 63541001  | 63542250  | ENSG00000163630 | SYNPR    | synaptoporin [So    | 3UTR | 0.014 | NO | 3.90  | 5.16  | - | - | - | no |
| chr3  | 63984751  | 63986000  | ENSG00000163635 | ATXN7    | ataxin 7 [Source:f  | 3UTR | 0.039 | NO | 10.14 | 13.21 | - | - | - | no |
| chr3  | 63985501  | 63987000  | ENSG00000163635 | ATXN7    | ataxin 7 [Source:f  | 3UTR | 0.002 | NO | 12.26 | 14.66 | - | - | - | no |
| chr3  | 63986501  | 63987750  | ENSG00000163635 | ATXN7    | ataxin 7 [Source:f  | 3UTR | 0.001 | NO | 9.43  | 10.94 | - | - | - | no |
| chr3  | 63983501  | 63985250  | ENSG00000163635 | ATXN7    | ataxin 7 [Source:f  | 3UTR | 0.002 | NO | 16.45 | 18.17 | - | - | - | no |
| chr3  | 122126126 | 122127375 | ENSG00000114023 | FAM162A  | family with seque   | 3UTR | 0.019 | NO | 0.99  | 2.89  | - | - | - | no |
| chr3  | 14154501  | 14155750  | ENSG00000163528 | CHCHD4   | coiled-coil-helix-c | 3UTR | 0.030 | NO | 0.92  | 2.06  | - | - | - | no |
| chr6  | 26054876  | 26056125  | ENSG00000187837 | HIST1H1C | histone cluster 1,  | 3UTR | 0.001 | NO | 4.75  | 2.48  | - | - | - | no |
| chr1  | 8021126   | 8022375   | ENSG00000116288 | PARK7    | parkinson protein   | 5UTR | 0.006 | NO | 3.05  | 3.92  | - | - | - | no |
| chr1  | 10458376  | 10459750  | ENSG00000142657 | PGD      | phosphogluconat     | 5UTR | 0.005 | NO | 0.85  | 3.30  | - | - | - | no |
| chr1  | 24104251  | 24105500  | ENSG00000057757 | PITHD1   | PITH (C-terminal    | 5UTR | 0.000 | NO | 2.27  | 4.34  | - | - | - | no |
| chr1  | 32670626  | 32671875  | ENSG00000160051 | IQCC     | IQ motif containir  | 5UTR | 0.031 | NO | 2.91  | 3.51  | - | - | - | no |
| chr1  | 33219001  | 33220250  | ENSG00000162522 | KIAA1522 | KIAA1522 [Source    | 5UTR | 0.005 | NO | 0.99  | 2.68  | - | - | - | no |
| chr1  | 41157126  | 41158375  | ENSG00000066136 | NFYC     | nuclear transcript  | 5UTR | 0.039 | NO | 2.13  | 2.06  | - | - | - | no |
| chr1  | 110026001 | 110027250 | ENSG00000162650 | ATXN7L2  | ataxin 7-like 2 [So | 5UTR | 0.039 | NO | 3.12  | 3.72  | - | - | - | no |
| chr1  | 150459126 | 150460500 | ENSG00000143374 | TARS2    | threonyl-tRNA syr   | 5UTR | 0.016 | NO | 2.98  | 4.95  | - | - | - | no |
| chr1  | 153606126 | 153607500 | ENSG00000160679 | CHTOP    | chromatin target    | 5UTR | 0.019 | NO | 3.26  | 4.54  | - | - | - | no |
| chr1  | 153699626 | 153701000 | ENSG00000143624 | INTS3    | integrator comple   | 5UTR | 0.014 | NO | 2.06  | 4.95  | - | - | - | no |
| chr1  | 155145126 | 155146500 | ENSG00000163462 | TRIM46   | tripartite motif cc | 5UTR | 0.004 | NO | 1.98  | 4.13  | - | - | - | no |
| chr1  | 156084001 | 156085250 | ENSG00000160789 | LMNA     | lamin A/C [Source   | 5UTR | 0.029 | NO | 2.13  | 3.51  | - | - | - | no |
| chr1  | 156182126 | 156183375 | ENSG00000160783 | PMF1     | polyamine-modul     | 5UTR | 0.002 | NO | 2.41  | 3.72  | - | - | - | no |
| chr1  | 160783751 | 160785125 | ENSG00000122224 | LY9      | lymphocyte antig    | 5UTR | 0.012 | NO | 1.28  | 2.27  | - | - | - | no |
| chr1  | 172501001 | 172502250 | ENSG00000094975 | SUCO     | SUN domain cont     | 5UTR | 0.016 | NO | 2.76  | 4.54  | - | - | - | no |
| chr1  | 179851001 | 179852375 | ENSG00000143337 | TOR1AIP1 | torsin A interactir | 5UTR | 0.009 | NO | 3.97  | 3.72  | - | - | - | no |
| chr1  | 200707376 | 200708750 | ENSG00000118200 | CAMSAP2  | calmodulin regula   | 5UTR | 0.002 | NO | 1.63  | 4.34  | - | - | - | no |
| chr1  | 219346501 | 219347875 | ENSG00000143353 | LYPLAL1  | lysophospholipas    | 5UTR | 0.000 | NO | 2.62  | 5.57  | - | - | - | no |
| chr1  | 227127126 | 227128375 | ENSG00000163050 | ADCK3    | aarF domain cont    | 5UTR | 0.041 | NO | 2.41  | 3.10  | - | - | - | no |
| chr1  | 2322376   | 2323750   | ENSG00000116151 | MORN1    | MORN repeat cor     | 5UTR | 0.004 | NO | 0.92  | 3.92  | - | - | - | no |

|       |           |           |                 |          |                          |       |    |       |       |   |   |   |    |
|-------|-----------|-----------|-----------------|----------|--------------------------|-------|----|-------|-------|---|---|---|----|
| chr1  | 6295376   | 6296625   | ENSG00000116237 | ICMT     | isoprenylcysteine 5UTR   | 0.043 | NO | 0.50  | 2.89  | - | - | - | no |
| chr1  | 6662251   | 6663500   | ENSG00000162413 | KLHL21   | kelch-like family r 5UTR | 0.037 | NO | 0.92  | 1.65  | - | - | - | no |
| chr1  | 16563001  | 16564375  | ENSG00000132881 | RSG1     | REM2 and RAB-lik 5UTR    | 0.001 | NO | 1.56  | 3.10  | - | - | - | no |
| chr1  | 20987501  | 20988750  | ENSG00000244038 | DDOST    | dolichyl-diphosph 5UTR   | 0.017 | NO | 1.84  | 2.48  | - | - | - | no |
| chr1  | 31537876  | 31539250  | ENSG00000134644 | PUM1     | pumilio homolog 5UTR     | 0.000 | NO | 1.49  | 4.13  | - | - | - | no |
| chr1  | 109968376 | 109969750 | ENSG00000143106 | PSMA5    | proteasome (pros 5UTR    | 0.003 | NO | 3.12  | 4.13  | - | - | - | no |
| chr1  | 114429876 | 114431125 | ENSG00000188761 | BCL2L15  | BCL2-like 15 [Soui 5UTR  | 0.030 | NO | 4.96  | 5.16  | - | - | - | no |
| chr1  | 115053126 | 115054625 | ENSG00000197323 | TRIM33   | tripartite motif cc 5UTR | 0.000 | NO | 8.79  | 15.28 | - | - | - | no |
| chr1  | 115299876 | 115301375 | ENSG00000009307 | CSDE1    | cold shock domain 5UTR   | 0.000 | NO | 11.48 | 16.72 | - | - | - | no |
| chr1  | 115282376 | 115283625 | ENSG00000009307 | CSDE1    | cold shock domain 5UTR   | 0.033 | NO | 4.96  | 5.57  | - | - | - | no |
| chr1  | 205179876 | 205181250 | ENSG00000133059 | DSTYK    | dual serine/threo 5UTR   | 0.005 | NO | 2.84  | 4.54  | - | - | - | no |
| chr1  | 246728876 | 246730125 | ENSG00000162851 | TFB2M    | transcription fact 5UTR  | 0.028 | NO | 1.35  | 2.89  | - | - | - | no |
| chr10 | 1033626   | 1034875   | ENSG00000107937 | GTPBP4   | GTP binding prote 5UTR   | 0.000 | NO | 2.91  | 4.54  | - | - | - | no |
| chr10 | 5726001   | 5727375   | ENSG00000108021 | FAM208B  | family with seque 5UTR   | 0.000 | NO | 2.69  | 5.37  | - | - | - | no |
| chr10 | 5931376   | 5932875   | ENSG00000134452 | FBXO18   | F-box protein, hel 5UTR  | 0.000 | NO | 3.12  | 6.19  | - | - | - | no |
| chr10 | 76585626  | 76586875  | ENSG00000156650 | KAT6B    | K(lysine) acetyltra 5UTR | 0.001 | NO | 2.84  | 3.51  | - | - | - | no |
| chr10 | 93557501  | 93558750  | ENSG00000107854 | TNKS2    | tankyrase, TRF1-i 5UTR   | 0.000 | NO | 2.48  | 3.92  | - | - | - | no |
| chr10 | 96161626  | 96162875  | ENSG00000108239 | TBC1D12  | TBC1 domain fam 5UTR     | 0.001 | NO | 0.64  | 3.30  | - | - | - | no |
| chr10 | 127511001 | 127512250 | ENSG00000107949 | BCCIP    | BRCA2 and CDKN: 5UTR     | 0.008 | NO | 3.05  | 5.37  | - | - | - | no |
| chr10 | 127511376 | 127512750 | ENSG00000107949 | BCCIP    | BRCA2 and CDKN: 5UTR     | 0.001 | NO | 3.54  | 5.99  | - | - | - | no |
| chr10 | 94333126  | 94334750  | ENSG00000119912 | IDE      | insulin-degrading 5UTR   | 0.008 | NO | 2.55  | 4.54  | - | - | - | no |
| chr11 | 18343501  | 18344875  | ENSG00000110768 | GTF2H1   | general transcript 5UTR  | 0.004 | NO | 2.20  | 3.92  | - | - | - | no |
| chr11 | 18417126  | 18418375  | ENSG00000134333 | LDHA     | lactate dehydroge 5UTR   | 0.005 | NO | 1.77  | 2.89  | - | - | - | no |
| chr11 | 46638126  | 46639375  | ENSG00000175224 | ATG13    | autophagy relate 5UTR    | 0.035 | NO | 2.41  | 4.13  | - | - | - | no |
| chr11 | 58345876  | 58347125  | ENSG00000255073 | ZFP91-CN | ZFP91-CNTF read 5UTR     | 0.025 | NO | 1.35  | 4.13  | - | - | - | no |
| chr11 | 61256126  | 61257500  | ENSG00000162148 | PPP1R32  | protein phosphat 5UTR    | 0.000 | NO | 1.84  | 5.16  | - | - | - | no |
| chr11 | 65382376  | 65383875  | ENSG00000197136 | PCNXL3   | pecanex-like 3 (Di 5UTR  | 0.000 | NO | 3.69  | 6.40  | - | - | - | no |
| chr11 | 70116126  | 70117375  | ENSG00000131626 | PPFIA1   | protein tyrosine p 5UTR  | 0.001 | NO | 2.20  | 3.30  | - | - | - | no |
| chr11 | 75109876  | 75111250  | ENSG00000149273 | RPS3     | ribosomal proteir 5UTR   | 0.002 | NO | 1.63  | 3.10  | - | - | - | no |
| chr11 | 47788501  | 47789750  | ENSG00000109920 | FNBP4    | formin binding pr 5UTR   | 0.003 | NO | 2.20  | 3.92  | - | - | - | no |
| chr11 | 59383126  | 59384375  | ENSG00000110048 | OSBP     | oxysterol binding 5UTR   | 0.018 | NO | 2.48  | 4.34  | - | - | - | no |

|       |           |           |                 |           |                          |       |    |      |       |   |   |   |    |
|-------|-----------|-----------|-----------------|-----------|--------------------------|-------|----|------|-------|---|---|---|----|
| chr11 | 59382751  | 59384000  | ENSG00000110048 | OSBP      | oxysterol binding 5UTR   | 0.004 | NO | 2.55 | 4.13  | - | - | - | no |
| chr11 | 62432001  | 62433500  | ENSG00000162194 | C11orf48  | chromosome 11 c 5UTR     | 0.000 | NO | 3.83 | 4.54  | - | - | - | no |
| chr11 | 64084376  | 64085625  | ENSG00000173113 | TRMT112   | tRNA methyltrans 5UTR    | 0.012 | NO | 2.91 | 4.54  | - | - | - | no |
| chr11 | 65429751  | 65431000  | ENSG00000173039 | RELA      | v-rel reticuloendc 5UTR  | 0.004 | NO | 1.42 | 3.72  | - | - | - | no |
| chr11 | 71813501  | 71814875  | ENSG00000149357 | LAMTOR1   | late endosomal/l 5UTR    | 0.019 | NO | 1.56 | 3.30  | - | - | - | no |
| chr11 | 77850001  | 77851375  | ENSG00000159063 | ALG8      | ALG8, alpha-1,3-g 5UTR   | 0.000 | NO | 2.34 | 2.89  | - | - | - | no |
| chr12 | 53845876  | 53847125  | ENSG00000197111 | PCBP2     | poly(rC) binding p 5UTR  | 0.004 | NO | 2.13 | 4.34  | - | - | - | no |
| chr12 | 54718126  | 54719500  | ENSG00000111481 | COPZ1     | coatomer protein 5UTR    | 0.000 | NO | 3.12 | 4.34  | - | - | - | no |
| chr3  | 40498251  | 40499500  | ENSG00000188846 | RPL14     | ribosomal proteir 5UTR   | 0.002 | NO | 2.69 | 3.72  | - | - | - | no |
| chr12 | 108078876 | 108080250 | ENSG00000136045 | PWP1      | PWP1 homolog (S 5UTR     | 0.000 | NO | 2.69 | 4.34  | - | - | - | no |
| chr12 | 124196251 | 124197500 | ENSG00000185344 | ATP6VOA2  | ATPase, H+ trans 5UTR    | 0.014 | NO | 1.42 | 2.89  | - | - | - | no |
| chr12 | 6579126   | 6580375   | ENSG00000139190 | VAMP1     | vesicle-associatec 5UTR  | 0.045 | NO | 1.70 | 3.51  | - | - | - | no |
| chr12 | 49524001  | 49525250  | ENSG00000123416 | TUBA1B    | tubulin, alpha 1b 5UTR   | 0.003 | NO | 4.18 | 3.72  | - | - | - | no |
| chr12 | 117627626 | 117628875 | ENSG00000135108 | FBXO21    | F-box protein 21   5UTR  | 0.037 | NO | 1.84 | 2.27  | - | - | - | no |
| chr13 | 20532251  | 20533500  | ENSG00000121741 | ZMYM2     | zinc finger, MYM- 5UTR   | 0.000 | NO | 2.84 | 5.16  | - | - | - | no |
| chr13 | 20356501  | 20357875  | ENSG00000121390 | PSPC1     | paraspeckle com 5UTR     | 0.013 | NO | 2.84 | 2.89  | - | - | - | no |
| chr13 | 39611501  | 39612875  | ENSG00000120685 | PROSER1   | proline and serine 5UTR  | 0.000 | NO | 3.54 | 5.16  | - | - | - | no |
| chr13 | 52026501  | 52027750  | ENSG00000102786 | INTS6     | integrator comple 5UTR   | 0.001 | NO | 2.84 | 4.13  | - | - | - | no |
| chr14 | 38063876  | 38065625  | ENSG00000139865 | TTC6      | tetratricopeptide 5UTR   | 0.000 | NO | 5.88 | 14.66 | - | - | - | no |
| chr14 | 76126751  | 76128000  | ENSG00000119685 | TTLL5     | tubulin tyrosine li 5UTR | 0.023 | NO | 2.69 | 3.72  | - | - | - | no |
| chr14 | 78226751  | 78228125  | ENSG00000197734 | C14orf178 | chromosome 14 c 5UTR     | 0.005 | NO | 1.98 | 4.75  | - | - | - | no |
| chr14 | 94492001  | 94493250  | ENSG00000089723 | OTUB2     | OTU domain, ubic 5UTR    | 0.012 | NO | 1.63 | 3.30  | - | - | - | no |
| chr14 | 99947126  | 99948375  | ENSG00000090061 | CCNK      | cyclin K [Source:H 5UTR  | 0.028 | NO | 2.27 | 3.10  | - | - | - | no |
| chr14 | 78082626  | 78084000  | ENSG00000100596 | SPTLC2    | serine palmitoyltr 5UTR  | 0.011 | NO | 2.06 | 4.75  | - | - | - | no |
| chr12 | 120933251 | 120934500 | ENSG00000088986 | DYNLL1    | dynein, light chair 5UTR | 0.027 | NO | 2.20 | 3.51  | - | - | - | no |
| chr14 | 91884001  | 91885250  | ENSG00000015133 | CCDC88C   | coiled-coil domair 5UTR  | 0.048 | NO | 1.84 | 3.10  | - | - | - | no |
| chr15 | 75315376  | 75316625  | ENSG00000138621 | PPCDC     | phosphopantothe 5UTR     | 0.001 | NO | 1.63 | 3.10  | - | - | - | no |
| chr15 | 93447001  | 93448250  | ENSG00000173575 | CHD2      | chromodomain h 5UTR      | 0.028 | NO | 3.90 | 5.78  | - | - | - | no |
| chr15 | 99790876  | 99792125  | ENSG00000168904 | LRRRC28   | leucine rich repea 5UTR  | 0.021 | NO | 1.91 | 3.10  | - | - | - | no |
| chr15 | 100105501 | 100106875 | ENSG00000068305 | MEF2A     | myocyte enhance 5UTR     | 0.000 | NO | 3.26 | 5.16  | - | - | - | no |
| chr15 | 65809251  | 65810500  | ENSG00000074603 | DPP8      | dipeptidyl-peptid: 5UTR  | 0.025 | NO | 0.99 | 3.72  | - | - | - | no |

|       |           |           |                 |          |                     |      |       |    |      |      |   |   |   |    |
|-------|-----------|-----------|-----------------|----------|---------------------|------|-------|----|------|------|---|---|---|----|
| chr15 | 81281501  | 81282750  | ENSG00000117899 | MESDC2   | mesoderm develc     | 5UTR | 0.000 | NO | 2.20 | 3.92 | - | - | - | no |
| chr15 | 102191876 | 102193125 | ENSG00000184277 | TM2D3    | TM2 domain cont     | 5UTR | 0.022 | NO | 2.34 | 5.37 | - | - | - | no |
| chr16 | 284251    | 285625    | ENSG00000167930 | ITFG3    | integrin alpha FG-  | 5UTR | 0.000 | NO | 3.05 | 4.34 | - | - | - | no |
| chr16 | 1832251   | 1833500   | ENSG00000095906 | NUBP2    | nucleotide bindin   | 5UTR | 0.023 | NO | 4.89 | 4.95 | - | - | - | no |
| chr16 | 2932501   | 2933875   | ENSG00000162076 | FLYWCH2  | FLYWCH family m     | 5UTR | 0.000 | NO | 3.90 | 6.40 | - | - | - | no |
| chr16 | 21964001  | 21965250  | ENSG00000140740 | UQCRC2   | ubiquinol-cytochr   | 5UTR | 0.029 | NO | 2.69 | 3.51 | - | - | - | no |
| chr16 | 28835126  | 28836375  | ENSG00000168488 | ATXN2L   | ataxin 2-like [Sou  | 5UTR | 0.026 | NO | 2.84 | 6.40 | - | - | - | no |
| chr16 | 12069876  | 12071125  | ENSG00000048471 | SNX29    | sorting nexin 29 [  | 5UTR | 0.013 | NO | 0.85 | 2.89 | - | - | - | no |
| chr16 | 50099501  | 50100875  | ENSG00000155393 | HEATR3   | HEAT repeat cont    | 5UTR | 0.000 | NO | 1.56 | 5.78 | - | - | - | no |
| chr16 | 50775251  | 50776500  | ENSG00000083799 | CYLD     | cylindromatosis (t  | 5UTR | 0.034 | NO | 2.27 | 3.51 | - | - | - | no |
| chr16 | 67193251  | 67194500  | ENSG00000135722 | FBXL8    | F-box and leucine   | 5UTR | 0.017 | NO | 1.70 | 3.30 | - | - | - | no |
| chr16 | 70322751  | 70324125  | ENSG00000157349 | DDX19B   | DEAD (Asp-Glu-Al    | 5UTR | 0.000 | NO | 3.62 | 4.34 | - | - | - | no |
| chr16 | 84852876  | 84854250  | ENSG00000103196 | CRISPLD2 | cysteine-rich secr  | 5UTR | 0.000 | NO | 1.42 | 4.95 | - | - | - | no |
| chr16 | 88636001  | 88637250  | ENSG00000158545 | ZC3H18   | zinc finger CCCH-t  | 5UTR | 0.002 | NO | 1.98 | 4.13 | - | - | - | no |
| chr16 | 3072251   | 3073625   | ENSG00000103145 | HCFC1R1  | host cell factor C1 | 5UTR | 0.002 | NO | 2.84 | 5.99 | - | - | - | no |
| chr16 | 87416876  | 87418125  | ENSG00000103264 | FBXO31   | F-box protein 31    | 5UTR | 0.022 | NO | 1.56 | 4.95 | - | - | - | no |
| chr17 | 79650251  | 79651500  | ENSG00000185359 | HGS      | hepatocyte growt    | 5UTR | 0.017 | NO | 2.62 | 4.13 | - | - | - | no |
| chr17 | 1419251   | 1420500   | ENSG00000132376 | INPP5K   | inositol polyphos   | 5UTR | 0.043 | NO | 1.91 | 3.51 | - | - | - | no |
| chr17 | 4458126   | 4459375   | ENSG00000132382 | MYBBP1A  | MYB binding prot    | 5UTR | 0.011 | NO | 0.50 | 2.48 | - | - | - | no |
| chr16 | 2014126   | 2015375   | ENSG00000140988 | RPS2     | ribosomal proteir   | 5UTR | 0.017 | NO | 4.54 | 4.13 | - | - | - | no |
| chr17 | 79817751  | 79819000  | ENSG00000185624 | P4HB     | prolyl 4-hydroxyl   | 5UTR | 0.012 | NO | 5.03 | 7.43 | - | - | - | no |
| chr18 | 33708626  | 33710000  | ENSG00000134759 | ELP2     | elongator acetyltr  | 5UTR | 0.000 | NO | 2.48 | 5.99 | - | - | - | no |
| chr18 | 33709126  | 33710375  | ENSG00000134759 | ELP2     | elongator acetyltr  | 5UTR | 0.010 | NO | 2.55 | 5.57 | - | - | - | no |
| chr18 | 77438626  | 77439875  | ENSG00000060069 | CTDP1    | CTD (carboxy-terr   | 5UTR | 0.009 | NO | 1.28 | 2.68 | - | - | - | no |
| chr19 | 4968251   | 4969625   | ENSG00000127663 | KDM4B    | lysine (K)-specific | 5UTR | 0.001 | NO | 1.98 | 3.51 | - | - | - | no |
| chr19 | 10827626  | 10829375  | ENSG00000079805 | DNM2     | dynamin 2 [Sourc    | 5UTR | 0.003 | NO | 6.03 | 4.95 | - | - | - | no |
| chr19 | 16221626  | 16222875  | ENSG00000167461 | RAB8A    | RAB8A, member f     | 5UTR | 0.015 | NO | 2.20 | 3.51 | - | - | - | no |
| chr19 | 17325751  | 17327125  | ENSG00000053501 | USE1     | unconventional S    | 5UTR | 0.007 | NO | 1.49 | 2.27 | - | - | - | no |
| chr19 | 19303001  | 19304250  | ENSG00000064490 | RFXANK   | regulatory factor   | 5UTR | 0.048 | NO | 0.99 | 3.10 | - | - | - | no |
| chr19 | 19626376  | 19627625  | ENSG00000186010 | NDUFA13  | NADH dehydroge      | 5UTR | 0.008 | NO | 1.06 | 1.86 | - | - | - | no |
| chr19 | 36119001  | 36120375  | ENSG00000126254 | RBM42    | RNA binding moti    | 5UTR | 0.004 | NO | 1.98 | 4.34 | - | - | - | no |

|       |           |           |                 |          |                         |       |    |      |      |   |   |   |    |
|-------|-----------|-----------|-----------------|----------|-------------------------|-------|----|------|------|---|---|---|----|
| chr19 | 36248376  | 36249625  | ENSG00000167595 | C19orf55 | chromosome 19 c5UTR     | 0.004 | NO | 1.28 | 3.72 | - | - | - | no |
| chr19 | 36605501  | 36607125  | ENSG00000105254 | TBCB     | tubulin folding co5UTR  | 0.000 | NO | 3.19 | 5.99 | - | - | - | no |
| chr19 | 38893001  | 38894250  | ENSG00000130244 | FAM98C   | family with seque5UTR   | 0.025 | NO | 1.49 | 2.06 | - | - | - | no |
| chr19 | 39902876  | 39904125  | ENSG00000090924 | PLEKHG2  | pleckstrin homolc5UTR   | 0.001 | NO | 3.62 | 3.30 | - | - | - | no |
| chr19 | 45393876  | 45395125  | ENSG00000130204 | TOMM40   | translocase of out5UTR  | 0.002 | NO | 2.69 | 4.95 | - | - | - | no |
| chr19 | 45393251  | 45394500  | ENSG00000130204 | TOMM40   | translocase of out5UTR  | 0.049 | NO | 3.05 | 4.75 | - | - | - | no |
| chr19 | 49990251  | 49991500  | ENSG00000142541 | RPL13A   | ribosomal proteir5UTR   | 0.001 | NO | 3.12 | 2.27 | - | - | - | no |
| chr19 | 50432126  | 50433375  | ENSG00000169136 | ATF5     | activating transcri5UTR | 0.031 | NO | 2.48 | 3.92 | - | - | - | no |
| chr19 | 52429376  | 52430750  | ENSG00000176024 | ZNF613   | zinc finger proteir5UTR | 0.010 | NO | 0.78 | 2.06 | - | - | - | no |
| chr19 | 52772251  | 52773500  | ENSG00000196214 | ZNF766   | zinc finger proteir5UTR | 0.003 | NO | 1.70 | 3.51 | - | - | - | no |
| chr19 | 10675876  | 10677250  | ENSG00000129347 | KRI1     | KRI1 homolog (S. 5UTR   | 0.000 | NO | 2.27 | 2.48 | - | - | - | no |
| chr19 | 10679126  | 10680500  | ENSG00000129355 | CDKN2D   | cyclin-dependent 5UTR   | 0.003 | NO | 0.71 | 3.30 | - | - | - | no |
| chr19 | 11615751  | 11617000  | ENSG00000161914 | ZNF653   | zinc finger proteir5UTR | 0.037 | NO | 1.63 | 2.27 | - | - | - | no |
| chr19 | 15489751  | 15491000  | ENSG00000105127 | AKAP8    | A kinase (PRKA) a 5UTR  | 0.021 | NO | 2.76 | 3.72 | - | - | - | no |
| chr19 | 15490126  | 15491375  | ENSG00000105127 | AKAP8    | A kinase (PRKA) a 5UTR  | 0.020 | NO | 2.48 | 3.30 | - | - | - | no |
| chr19 | 15529126  | 15530625  | ENSG00000011243 | AKAP8L   | A kinase (PRKA) a 5UTR  | 0.002 | NO | 2.13 | 4.34 | - | - | - | no |
| chr19 | 46194626  | 46196000  | ENSG00000125743 | SNRPD2   | small nuclear ribo5UTR  | 0.001 | NO | 2.55 | 4.95 | - | - | - | no |
| chr1  | 1334126   | 1335375   | ENSG00000221978 | CCNL2    | cyclin L2 [Source: 5UTR | 0.019 | NO | 1.35 | 3.10 | - | - | - | no |
| chr2  | 9983126   | 9984375   | ENSG00000115750 | TAF1B    | TATA box binding 5UTR   | 0.027 | NO | 1.70 | 4.54 | - | - | - | no |
| chr2  | 32581376  | 32582750  | ENSG00000115760 | BIRC6    | baculoviral IAP re 5UTR | 0.001 | NO | 2.76 | 4.13 | - | - | - | no |
| chr2  | 46843501  | 46844875  | ENSG00000119878 | CRIP1    | cysteine-rich PDZ 5UTR  | 0.000 | NO | 3.26 | 6.40 | - | - | - | no |
| chr2  | 64067501  | 64068750  | ENSG00000169764 | UGP2     | UDP-glucose pyro5UTR    | 0.037 | NO | 2.98 | 3.92 | - | - | - | no |
| chr2  | 68693876  | 68695250  | ENSG00000169621 | APLF     | aprataxin and PNI5UTR   | 0.004 | NO | 1.21 | 4.34 | - | - | - | no |
| chr2  | 70056001  | 70057375  | ENSG00000087338 | GMCL1    | germ cell-less, spc5UTR | 0.000 | NO | 2.98 | 5.37 | - | - | - | no |
| chr2  | 70313501  | 70314875  | ENSG00000169564 | PCBP1    | poly(rC) binding p5UTR  | 0.000 | NO | 3.90 | 4.75 | - | - | - | no |
| chr2  | 75185126  | 75186500  | ENSG00000115350 | POLE4    | polymerase (DNA 5UTR    | 0.028 | NO | 2.41 | 3.92 | - | - | - | no |
| chr2  | 85765626  | 85766875  | ENSG00000168906 | MAT2A    | methionine adenc5UTR    | 0.029 | NO | 4.18 | 5.78 | - | - | - | no |
| chr2  | 101178751 | 101180375 | ENSG00000115539 | PDCL3    | phosducin-like 3 [5UTR  | 0.000 | NO | 2.20 | 6.61 | - | - | - | no |
| chr2  | 208394126 | 208395375 | ENSG00000118260 | CREB1    | cAMP responsive 5UTR    | 0.035 | NO | 2.06 | 5.16 | - | - | - | no |
| chr2  | 208393751 | 208395000 | ENSG00000118260 | CREB1    | cAMP responsive 5UTR    | 0.016 | NO | 2.41 | 5.16 | - | - | - | no |
| chr2  | 217362876 | 217364250 | ENSG00000197756 | RPL37A   | ribosomal proteir5UTR   | 0.002 | NO | 3.19 | 3.72 | - | - | - | no |

|       |           |           |                 |         |                          |       |    |      |      |   |   |   |    |
|-------|-----------|-----------|-----------------|---------|--------------------------|-------|----|------|------|---|---|---|----|
| chr2  | 219081126 | 219082500 | ENSG00000163466 | ARPC2   | actin related prot 5UTR  | 0.000 | NO | 2.48 | 6.40 | - | - | - | no |
| chr2  | 242088876 | 242090500 | ENSG00000115685 | PPP1R7  | protein phosphat 5UTR    | 0.000 | NO | 4.54 | 7.23 | - | - | - | no |
| chr2  | 96873876  | 96875250  | ENSG00000084090 | STARD7  | StAR-related lipid 5UTR  | 0.000 | NO | 3.33 | 6.61 | - | - | - | no |
| chr2  | 97523251  | 97524625  | ENSG00000213337 | ANKRD39 | ankyrin repeat do 5UTR   | 0.007 | NO | 3.19 | 3.92 | - | - | - | no |
| chr2  | 150443626 | 150445000 | ENSG00000168288 | MMADHC  | methylmalonic ac 5UTR    | 0.000 | NO | 1.70 | 4.13 | - | - | - | no |
| chr2  | 153573251 | 153574625 | ENSG00000196504 | PRPF40A | PRP40 pre-mRNA 5UTR      | 0.002 | NO | 3.76 | 4.75 | - | - | - | no |
| chr2  | 232645376 | 232646750 | ENSG00000156973 | PDE6D   | phosphodiesteras 5UTR    | 0.002 | NO | 2.27 | 3.51 | - | - | - | no |
| chr20 | 306376    | 307875    | ENSG00000177732 | SOX12   | SRY (sex determir 5UTR   | 0.004 | NO | 1.06 | 2.48 | - | - | - | no |
| chr20 | 1098626   | 1099875   | ENSG00000125818 | PSMF1   | proteasome (pros 5UTR    | 0.049 | NO | 1.06 | 2.68 | - | - | - | no |
| chr20 | 3189376   | 3190625   | ENSG00000125877 | ITPA    | inosine triphosph 5UTR   | 0.025 | NO | 0.28 | 1.65 | - | - | - | no |
| chr20 | 3869626   | 3870875   | ENSG00000125779 | PANK2   | pantothenate kin: 5UTR   | 0.023 | NO | 2.13 | 2.48 | - | - | - | no |
| chr20 | 5107126   | 5108500   | ENSG00000101290 | CDS2    | CDP-diacylglycero 5UTR   | 0.001 | NO | 0.57 | 2.89 | - | - | - | no |
| chr20 | 16710001  | 16711250  | ENSG00000125870 | SNRPB2  | small nuclear ribo 5UTR  | 0.020 | NO | 3.40 | 4.54 | - | - | - | no |
| chr20 | 21283376  | 21284625  | ENSG00000088930 | XRN2    | 5'-3' exoribonucle 5UTR  | 0.010 | NO | 2.84 | 3.72 | - | - | - | no |
| chr20 | 32581126  | 32582375  | ENSG00000125970 | RALY    | RNA binding prot: 5UTR   | 0.017 | NO | 1.35 | 2.48 | - | - | - | no |
| chr20 | 44044126  | 44045375  | ENSG00000124155 | PIGT    | phosphatidylinosi 5UTR   | 0.047 | NO | 3.76 | 5.16 | - | - | - | no |
| chr20 | 44509126  | 44510500  | ENSG00000168612 | ZSWIM1  | zinc finger, SWIM 5UTR   | 0.003 | NO | 1.77 | 4.54 | - | - | - | no |
| chr20 | 48428751  | 48430125  | ENSG00000197818 | SLC9A8  | solute carrier fam 5UTR  | 0.004 | NO | 2.06 | 5.37 | - | - | - | no |
| chr20 | 56963626  | 56964875  | ENSG00000124164 | VAPB    | VAMP (vesicle-as: 5UTR   | 0.049 | NO | 3.62 | 5.37 | - | - | - | no |
| chr20 | 60696376  | 60697750  | ENSG00000149657 | LSM14B  | LSM14B, SCD6 ho 5UTR     | 0.006 | NO | 2.41 | 4.75 | - | - | - | no |
| chr20 | 60812876  | 60814250  | ENSG00000130703 | OSBPL2  | oxysterol binding 5UTR   | 0.001 | NO | 1.77 | 2.89 | - | - | - | no |
| chr20 | 60877126  | 60878375  | ENSG00000130706 | ADRM1   | adhesion regulati 5UTR   | 0.040 | NO | 2.13 | 3.51 | - | - | - | no |
| chr20 | 61273501  | 61274875  | ENSG00000101187 | SLCO4A1 | solute carrier org: 5UTR | 0.004 | NO | 2.20 | 5.57 | - | - | - | no |
| chr20 | 62495751  | 62497125  | ENSG00000101150 | TPD52L2 | tumor protein D5 5UTR    | 0.011 | NO | 2.91 | 4.95 | - | - | - | no |
| chr20 | 32307501  | 32308750  | ENSG00000101417 | PXMP4   | peroxisomal mer: 5UTR    | 0.011 | NO | 1.42 | 1.86 | - | - | - | no |
| chr20 | 39317251  | 39318750  | ENSG00000204103 | MAFB    | v-maf musculoap: 5UTR    | 0.001 | NO | 1.35 | 3.92 | - | - | - | no |
| chr2  | 32235501  | 32236750  | ENSG00000162959 | MEMO1   | mediator of cell n 5UTR  | 0.020 | NO | 0.78 | 3.30 | - | - | - | no |
| chr21 | 37528001  | 37529250  | ENSG00000142197 | DOPEY2  | dopey family mer 5UTR    | 0.002 | NO | 2.41 | 4.13 | - | - | - | no |
| chr21 | 40759001  | 40760375  | ENSG00000182093 | WRB     | tryptophan rich b 5UTR   | 0.003 | NO | 2.13 | 3.92 | - | - | - | no |
| chr21 | 45208626  | 45210000  | ENSG00000160214 | RRP1    | ribosomal RNA pr 5UTR    | 0.000 | NO | 2.91 | 5.37 | - | - | - | no |
| chr21 | 47878126  | 47879375  | ENSG00000160305 | DIP2A   | DIP2 disco-interac 5UTR  | 0.005 | NO | 3.90 | 5.78 | - | - | - | no |

|       |           |           |                 |          |                          |       |    |      |      |   |   |   |    |
|-------|-----------|-----------|-----------------|----------|--------------------------|-------|----|------|------|---|---|---|----|
| chr21 | 35287501  | 35288750  | ENSG00000241837 | ATP5O    | ATP synthase, H+ 5UTR    | 0.001 | NO | 2.20 | 3.72 | - | - | - | no |
| chr21 | 40685001  | 40686375  | ENSG00000185658 | BRWD1    | bromodomain an 5UTR      | 0.000 | NO | 4.18 | 5.99 | - | - | - | no |
| chr21 | 44527001  | 44528375  | ENSG00000160201 | U2AF1    | U2 small nuclear l 5UTR  | 0.003 | NO | 2.69 | 5.78 | - | - | - | no |
| chr22 | 20861501  | 20862750  | ENSG00000099917 | MED15    | mediator comple 5UTR     | 0.035 | NO | 1.06 | 3.30 | - | - | - | no |
| chr22 | 29663001  | 29664375  | ENSG00000182944 | EWSR1    | Ewing sarcoma br 5UTR    | 0.000 | NO | 1.49 | 3.51 | - | - | - | no |
| chr22 | 38597626  | 38598875  | ENSG00000185022 | MAFF     | v-maf musculoap 5UTR     | 0.020 | NO | 2.27 | 2.89 | - | - | - | no |
| chr22 | 41600751  | 41602000  | ENSG00000100395 | L3MBTL2  | l(3)mbt-like 2 (Dr 5UTR  | 0.042 | NO | 0.78 | 2.06 | - | - | - | no |
| chr22 | 24950501  | 24951875  | ENSG00000138867 | GUCD1    | guanylyl cyclase d 5UTR  | 0.005 | NO | 2.62 | 4.95 | - | - | - | no |
| chr22 | 30722126  | 30723375  | ENSG00000099992 | TBC1D10A | TBC1 domain fam 5UTR     | 0.038 | NO | 0.57 | 2.68 | - | - | - | no |
| chr3  | 9470751   | 9472000   | ENSG00000168137 | SETD5    | SET domain conta 5UTR    | 0.003 | NO | 1.77 | 2.89 | - | - | - | no |
| chr3  | 122513251 | 122514500 | ENSG00000138463 | DIRC2    | disrupted in renal 5UTR  | 0.041 | NO | 1.56 | 3.51 | - | - | - | no |
| chr3  | 133291501 | 133292750 | ENSG00000091527 | CDV3     | CDV3 homolog (r 5UTR     | 0.048 | NO | 1.77 | 3.72 | - | - | - | no |
| chr3  | 141456501 | 141457750 | ENSG00000114125 | RNF7     | ring finger proteir 5UTR | 0.012 | NO | 1.28 | 3.72 | - | - | - | no |
| chr3  | 142719751 | 142721000 | ENSG00000163714 | U2SURP   | U2 snRNP-associa 5UTR    | 0.041 | NO | 0.99 | 4.13 | - | - | - | no |
| chr3  | 179280001 | 179281250 | ENSG00000136518 | ACTL6A   | actin-like 6A [Sou 5UTR  | 0.005 | NO | 2.48 | 1.86 | - | - | - | no |
| chr3  | 185303251 | 185304500 | ENSG00000163904 | SENP2    | SUMO1/sentrin/S 5UTR     | 0.008 | NO | 1.91 | 4.13 | - | - | - | no |
| chr3  | 193310251 | 193311500 | ENSG00000198836 | OPA1     | optic atrophy 1 (a 5UTR  | 0.000 | NO | 4.61 | 5.16 | - | - | - | no |
| chr3  | 149688251 | 149689750 | ENSG00000070087 | PFN2     | profilin 2 [Source: 5UTR | 0.033 | NO | 3.26 | 5.78 | - | - | - | no |
| chr3  | 195163001 | 195164500 | ENSG00000114331 | ACAP2    | ArfGAP with coile 5UTR   | 0.000 | NO | 7.59 | 9.29 | - | - | - | no |
| chr4  | 4291251   | 4292500   | ENSG00000168826 | ZBTB49   | zinc finger and BT 5UTR  | 0.000 | NO | 1.77 | 2.68 | - | - | - | no |
| chr4  | 6783751   | 6785000   | ENSG00000170871 | KIAA0232 | KIAA0232 [Source 5UTR    | 0.010 | NO | 0.78 | 2.48 | - | - | - | no |
| chr4  | 48832376  | 48833625  | ENSG00000109180 | OCIAD1   | OCIA domain con 5UTR     | 0.039 | NO | 1.21 | 2.89 | - | - | - | no |
| chr4  | 52708501  | 52709875  | ENSG00000109184 | DCUN1D4  | DCN1, defective ii 5UTR  | 0.001 | NO | 3.12 | 3.30 | - | - | - | no |
| chr4  | 87927501  | 87928750  | ENSG00000172493 | AFF1     | AF4/FMR2 family, 5UTR    | 0.036 | NO | 1.84 | 3.10 | - | - | - | no |
| chr4  | 87855626  | 87857000  | ENSG00000172493 | AFF1     | AF4/FMR2 family, 5UTR    | 0.018 | NO | 1.42 | 1.86 | - | - | - | no |
| chr4  | 1241876   | 1243125   | ENSG00000159692 | CTBP1    | C-terminal bindin 5UTR   | 0.000 | NO | 1.49 | 4.34 | - | - | - | no |
| chr4  | 2757251   | 2758500   | ENSG00000168884 | TNIP2    | TNFAIP3 interacti 5UTR   | 0.011 | NO | 1.06 | 3.30 | - | - | - | no |
| chr4  | 24585501  | 24586875  | ENSG00000109606 | DHX15    | DEAH (Asp-Glu-Al 5UTR    | 0.000 | NO | 2.62 | 3.92 | - | - | - | no |
| chr4  | 77996501  | 77998000  | ENSG00000118816 | CCNI     | cyclin I [Source:H 5UTR  | 0.001 | NO | 4.82 | 5.37 | - | - | - | no |
| chr4  | 103748126 | 103749500 | ENSG00000109332 | UBE2D3   | ubiquitin-conjuga 5UTR   | 0.000 | NO | 2.20 | 4.34 | - | - | - | no |
| chr4  | 108640751 | 108642250 | ENSG00000138801 | PAPSS1   | 3'-phosphoadeno 5UTR     | 0.000 | NO | 1.28 | 4.34 | - | - | - | no |

|      |           |           |                 |          |                     |      |       |    |      |      |   |   |   |    |
|------|-----------|-----------|-----------------|----------|---------------------|------|-------|----|------|------|---|---|---|----|
| chr4 | 111543751 | 111545000 | ENSG00000164093 | PITX2    | paired-like homec   | 5UTR | 0.004 | NO | 0.78 | 2.48 | - | - | - | no |
| chr1 | 226249626 | 226250875 | ENSG00000163041 | H3F3A    | H3 histone, family  | 5UTR | 0.010 | NO | 0.71 | 2.68 | - | - | - | no |
| chr5 | 31531501  | 31532875  | ENSG00000082213 | C5orf22  | chromosome 5 or     | 5UTR | 0.000 | NO | 2.48 | 4.75 | - | - | - | no |
| chr5 | 68389126  | 68390500  | ENSG00000145740 | SLC30A5  | solute carrier fam  | 5UTR | 0.000 | NO | 3.12 | 3.72 | - | - | - | no |
| chr5 | 112311501 | 112313000 | ENSG00000172795 | DCP2     | DCP2 decapping e    | 5UTR | 0.000 | NO | 2.62 | 5.57 | - | - | - | no |
| chr5 | 139780501 | 139782000 | ENSG00000131503 | ANKHD1   | ankyrin repeat an   | 5UTR | 0.002 | NO | 4.40 | 5.99 | - | - | - | no |
| chr5 | 141348001 | 141349250 | ENSG00000013561 | RNF14    | ring finger proteir | 5UTR | 0.038 | NO | 1.49 | 4.13 | - | - | - | no |
| chr5 | 145826126 | 145827500 | ENSG00000113649 | TCERG1   | transcription elon  | 5UTR | 0.000 | NO | 3.40 | 3.92 | - | - | - | no |
| chr5 | 148736876 | 148738250 | ENSG00000145882 | PCYOX1L  | prenylcysteine ox   | 5UTR | 0.001 | NO | 2.62 | 3.92 | - | - | - | no |
| chr5 | 175223376 | 175224750 | ENSG00000145920 | CPLX2    | complexin 2 [Sou    | 5UTR | 0.000 | NO | 4.04 | 4.13 | - | - | - | no |
| chr5 | 175874751 | 175876000 | ENSG00000113194 | FAF2     | Fas associated fac  | 5UTR | 0.003 | NO | 2.76 | 3.30 | - | - | - | no |
| chr5 | 177557126 | 177558750 | ENSG00000145916 | RMND5B   | required for meio   | 5UTR | 0.000 | NO | 2.76 | 8.67 | - | - | - | no |
| chr5 | 178985876 | 178987250 | ENSG00000176783 | RUFY1    | RUN and FYVE do     | 5UTR | 0.020 | NO | 1.70 | 4.13 | - | - | - | no |
| chr5 | 179125001 | 179126625 | ENSG00000127022 | CANX     | calnexin [Source:l  | 5UTR | 0.000 | NO | 3.47 | 7.02 | - | - | - | no |
| chr5 | 1345001   | 1346250   | ENSG00000049656 | CLPTM1L  | CLPTM1-like [Sou    | 5UTR | 0.002 | NO | 3.19 | 4.95 | - | - | - | no |
| chr5 | 77071501  | 77072750  | ENSG00000171530 | TBCA     | tubulin folding co  | 5UTR | 0.010 | NO | 1.35 | 3.51 | - | - | - | no |
| chr6 | 13614876  | 13616125  | ENSG00000225921 | NOL7     | nucleolar protein   | 5UTR | 0.020 | NO | 2.69 | 3.30 | - | - | - | no |
| chr6 | 30584376  | 30585750  | ENSG00000204568 | MRPS18B  | mitochondrial rib   | 5UTR | 0.000 | NO | 2.55 | 5.78 | - | - | - | no |
| chr6 | 37137251  | 37138500  | ENSG00000137193 | PIM1     | pim-1 oncogene [    | 5UTR | 0.005 | NO | 1.70 | 3.92 | - | - | - | no |
| chr6 | 109169001 | 109170250 | ENSG00000118690 | ARMC2    | armadillo repeat    | 5UTR | 0.000 | NO | 1.56 | 2.89 | - | - | - | no |
| chr6 | 170151001 | 170152250 | ENSG00000130023 | C6orf70  | chromosome 6 or     | 5UTR | 0.000 | NO | 2.62 | 2.68 | - | - | - | no |
| chr6 | 26056001  | 26057375  | ENSG00000187837 | HIST1H1C | histone cluster 1,  | 5UTR | 0.000 | NO | 6.66 | 4.13 | - | - | - | no |
| chr6 | 56708376  | 56709750  | ENSG00000151914 | DST      | dystonin [Source:   | 5UTR | 0.000 | NO | 1.63 | 2.68 | - | - | - | no |
| chr6 | 135375251 | 135376750 | ENSG00000112339 | HBS1L    | HBS1-like (S. cere  | 5UTR | 0.000 | NO | 3.83 | 5.57 | - | - | - | no |
| chr7 | 1576251   | 1577500   | ENSG00000198517 | MAFK     | v-maf musculoap     | 5UTR | 0.019 | NO | 2.27 | 4.95 | - | - | - | no |
| chr7 | 100025751 | 100027000 | ENSG00000146834 | MEPCE    | methylphosphate     | 5UTR | 0.032 | NO | 3.76 | 5.99 | - | - | - | no |
| chr7 | 100136001 | 100137250 | ENSG00000106351 | AGFG2    | ArfGAP with FG r    | 5UTR | 0.037 | NO | 1.28 | 4.13 | - | - | - | no |
| chr7 | 100183251 | 100184875 | ENSG00000106336 | FBXO24   | F-box protein 24    | 5UTR | 0.000 | NO | 4.04 | 5.57 | - | - | - | no |
| chr7 | 148981626 | 148983000 | ENSG00000204946 | ZNF783   | zinc finger family  | 5UTR | 0.013 | NO | 1.70 | 4.34 | - | - | - | no |
| chr7 | 154861251 | 154862500 | ENSG00000157219 | HTR5A    | 5-hydroxytryptan    | 5UTR | 0.010 | NO | 1.77 | 3.51 | - | - | - | no |
| chr7 | 1498251   | 1499750   | ENSG00000164877 | MICALL2  | MICAL-like 2 [Sou   | 5UTR | 0.000 | NO | 1.70 | 5.37 | - | - | - | no |



|      |           |           |                 |             |                                           |      |       |    |      |      |   |   |   |    |
|------|-----------|-----------|-----------------|-------------|-------------------------------------------|------|-------|----|------|------|---|---|---|----|
| chr6 | 74230376  | 74231625  | ENSG00000156508 | EEF1A1      | eukaryotic transl                         | 5UTR | 0.024 | NO | 2.20 | 4.34 | - | - | - | no |
| chr7 | 33101751  | 33103125  | ENSG00000122643 | NT5C3A      | 5'-nucleotidase, c                        | 5UTR | 0.000 | NO | 1.91 | 4.75 | - | - | - | no |
| chr7 | 35734126  | 35735375  | ENSG00000122557 | HERPUD2     | HERPUD family m                           | 5UTR | 0.002 | NO | 1.63 | 4.95 | - | - | - | no |
| chr7 | 42971376  | 42972625  | ENSG00000106588 | PSMA2       | proteasome (pros                          | 5UTR | 0.034 | NO | 1.49 | 2.06 | - | - | - | no |
| chr7 | 91763376  | 91764625  | ENSG00000001630 | CYP51A1     | cytochrome P450                           | 5UTR | 0.044 | NO | 1.56 | 2.48 | - | - | - | no |
| chr8 | 29939876  | 29941250  | ENSG00000133872 | TMEM66      | transmembrane $\mu$                       | 5UTR | 0.005 | NO | 0.64 | 3.30 | - | - | - | no |
| chr8 | 99129001  | 99130375  | ENSG00000132541 | HRSP12      | heat-responsive $\mu$                     | 5UTR | 0.000 | NO | 4.04 | 6.81 | - | - | - | no |
| chr8 | 101733751 | 101735000 | ENSG00000070756 | PABPC1      | poly(A) binding pr                        | 5UTR | 0.003 | NO | 2.20 | 4.95 | - | - | - | no |
| chr8 | 144623251 | 144624500 | ENSG00000014164 | ZC3H3       | zinc finger CCCH-t                        | 5UTR | 0.006 | NO | 1.91 | 3.10 | - | - | - | no |
| chr9 | 129566626 | 129567875 | ENSG00000169155 | ZBTB43      | zinc finger and BT                        | 5UTR | 0.005 | NO | 1.63 | 3.72 | - | - | - | no |
| chr9 | 134000251 | 134001500 | ENSG00000126883 | NUP214      | nucleoporin 214k                          | 5UTR | 0.044 | NO | 2.48 | 3.51 | - | - | - | no |
| chr9 | 139743001 | 139744500 | ENSG00000054148 | PHPT1       | phosphohistidine                          | 5UTR | 0.004 | NO | 2.98 | 5.16 | - | - | - | no |
| chr9 | 94877001  | 94878250  | ENSG00000090054 | SPTLC1      | serine palmitoyltr                        | 5UTR | 0.039 | NO | 1.49 | 3.72 | - | - | - | no |
| chr9 | 100459001 | 100460250 | ENSG00000136936 | XPA         | xeroderma pigme                           | 5UTR | 0.014 | NO | 2.76 | 4.75 | - | - | - | no |
| chr9 | 127951501 | 127952750 | ENSG00000119414 | PPP6C       | protein phosphat                          | 5UTR | 0.028 | NO | 1.56 | 2.48 | - | - | - | no |
| chr9 | 140094626 | 140095875 | ENSG00000176058 | TPRN        | taperin [Source:H                         | 5UTR | 0.009 | NO | 1.63 | 3.30 | - | - | - | no |
| chrX | 13670501  | 13671750  | ENSG00000176896 | TCEANC      | transcription elon                        | 5UTR | 0.003 | NO | 1.49 | 3.72 | - | - | - | no |
| chrX | 48397376  | 48398750  | ENSG00000068354 | TBC1D25     | TBC1 domain fam                           | 5UTR | 0.002 | NO | 1.13 | 2.27 | - | - | - | no |
| chrX | 146992626 | 146993875 | ENSG00000102081 | FMR1        | fragile X mental r                        | 5UTR | 0.005 | NO | 1.28 | 2.89 | - | - | - | no |
| chrX | 16887876  | 16889125  | ENSG00000102054 | RBBP7       | retinoblastoma bi                         | 5UTR | 0.016 | NO | 2.27 | 3.51 | - | - | - | no |
| chrX | 48814501  | 48815875  | ENSG00000068308 | OTUD5       | OTU domain cont                           | 5UTR | 0.010 | NO | 2.48 | 4.34 | - | - | - | no |
| chrX | 106959626 | 106960875 | ENSG00000157514 | TSC22D3     | TSC22 domain far                          | 5UTR | 0.008 | NO | 1.77 | 2.06 | - | - | - | no |
| chr6 | 33167876  | 33169250  | ENSG00000204231 | RXR $\beta$ | retinoid X recept                         | 5UTR | 0.000 | NO | 1.63 | 5.37 | - | - | - | no |
| chr6 | 33238626  | 33240000  | ENSG00000223501 | VPS52       | vacuolar protein $\epsilon$               | 5UTR | 0.001 | NO | 2.34 | 4.34 | - | - | - | no |
| chr1 | 32816751  | 32818000  | ENSG00000162526 | TSSK3       | testis-specific seri                      | exon | 0.017 | NO | 1.42 | 3.30 | - | - | - | no |
| chr1 | 114223376 | 114224625 | ENSG00000081026 | MAGI3       | membrane associ                           | exon | 0.003 | NO | 2.20 | 3.10 | - | - | - | no |
| chr1 | 116930876 | 116932125 | ENSG00000163399 | ATP1A1      | ATPase, Na <sup>+</sup> /K <sup>+</sup> t | exon | 0.002 | NO | 3.69 | 6.19 | - | - | - | no |
| chr1 | 116936251 | 116937500 | ENSG00000163399 | ATP1A1      | ATPase, Na <sup>+</sup> /K <sup>+</sup> t | exon | 0.000 | NO | 4.25 | 5.57 | - | - | - | no |
| chr1 | 150248626 | 150249875 | ENSG00000118292 | C1orf54     | chromosome 1 or                           | exon | 0.004 | NO | 1.35 | 2.27 | - | - | - | no |
| chr1 | 27816001  | 27817375  | ENSG00000158195 | WASF2       | WAS protein fami                          | exon | 0.004 | NO | 1.35 | 2.48 | - | - | - | no |
| chr1 | 114949001 | 114950250 | ENSG00000197323 | TRIM33      | tripartite motif cc                       | exon | 0.039 | NO | 4.04 | 5.57 | - | - | - | no |

|       |           |           |                 |         |                          |       |    |       |       |   |   |   |    |
|-------|-----------|-----------|-----------------|---------|--------------------------|-------|----|-------|-------|---|---|---|----|
| chr1  | 114968876 | 114970125 | ENSG00000197323 | TRIM33  | tripartite motif cc exon | 0.006 | NO | 4.82  | 5.37  | - | - | - | no |
| chr1  | 115255876 | 115257125 | ENSG00000213281 | NRAS    | neuroblastoma R/exon     | 0.013 | NO | 3.83  | 5.37  | - | - | - | no |
| chr1  | 151762376 | 151763750 | ENSG00000182134 | TDRKH   | tudor and KH don exon    | 0.000 | NO | 6.88  | 6.81  | - | - | - | no |
| chr1  | 154945876 | 154947125 | ENSG00000160691 | SHC1    | SHC (Src homolog exon    | 0.010 | NO | 2.91  | 5.57  | - | - | - | no |
| chr1  | 155196876 | 155198125 | ENSG00000160766 | GBAP1   | glucosidase, beta, exon  | 0.021 | NO | 2.48  | 4.13  | - | - | - | no |
| chr1  | 160231626 | 160233000 | ENSG00000132716 | DCAF8   | DDB1 and CUL4 a exon     | 0.000 | NO | 1.56  | 4.34  | - | - | - | no |
| chr11 | 64901501  | 64903000  | ENSG00000162298 | SYVN1   | synovial apoptosi exon   | 0.000 | NO | 4.18  | 4.54  | - | - | - | no |
| chr11 | 66725126  | 66726375  | ENSG00000173599 | PC      | pyruvate carboxyl exon   | 0.031 | NO | 1.42  | 3.92  | - | - | - | no |
| chr11 | 122932626 | 122933875 | ENSG00000109971 | HSPA8   | heat shock 70kDa exon    | 0.042 | NO | 2.13  | 3.51  | - | - | - | no |
| chr13 | 26795376  | 26796625  | ENSG00000127870 | RNF6    | ring finger proteir exon | 0.002 | NO | 3.47  | 5.16  | - | - | - | no |
| chr14 | 35342376  | 35343750  | ENSG00000198604 | BAZ1A   | bromodomain ad exon      | 0.026 | NO | 2.91  | 3.51  | - | - | - | no |
| chr15 | 23033876  | 23035125  | ENSG00000140157 | NIPAA2  | non imprinted in exon    | 0.013 | NO | 1.13  | 1.86  | - | - | - | no |
| chr15 | 72522876  | 72524250  | ENSG00000067225 | PKM     | pyruvate kinase, r exon  | 0.005 | NO | 3.83  | 4.75  | - | - | - | no |
| chr15 | 78591376  | 78592625  | ENSG00000140395 | WDR61   | WD repeat domai exon     | 0.005 | NO | 1.56  | 3.10  | - | - | - | no |
| chr17 | 57757876  | 57759125  | ENSG00000141367 | CLTC    | clathrin, heavy ch exon  | 0.025 | NO | 1.98  | 4.75  | - | - | - | no |
| chr17 | 60483376  | 60484625  | ENSG00000172421 | EFCAB3  | EF-hand calcium t exon   | 0.019 | NO | 1.77  | 2.68  | - | - | - | no |
| chr17 | 44270876  | 44272125  | ENSG00000120071 | KANSL1  | KAT8 regulatory l exon   | 0.035 | NO | 0.78  | 2.27  | - | - | - | no |
| chr17 | 47439126  | 47440375  | ENSG00000198740 | ZNF652  | zinc finger proteir exon | 0.050 | NO | 2.76  | 4.54  | - | - | - | no |
| chr17 | 60001126  | 60002500  | ENSG00000108506 | INTS2   | integrator comple exon   | 0.033 | NO | 2.06  | 3.72  | - | - | - | no |
| chr17 | 59945001  | 59946500  | ENSG00000108506 | INTS2   | integrator comple exon   | 0.007 | NO | 17.01 | 14.45 | - | - | - | no |
| chr17 | 77983876  | 77985250  | ENSG00000167291 | TBC1D16 | TBC1 domain fam exon     | 0.021 | NO | 1.06  | 3.30  | - | - | - | no |
| chr19 | 1220626   | 1221875   | ENSG00000118046 | STK11   | serine/threonine exon    | 0.037 | NO | 1.06  | 3.10  | - | - | - | no |
| chr19 | 10490626  | 10492000  | ENSG00000105397 | TYK2    | tyrosine kinase 2 exon   | 0.014 | NO | 1.63  | 3.72  | - | - | - | no |
| chr19 | 10612251  | 10613625  | ENSG00000079999 | KEAP1   | kelch-like ECH-ass exon  | 0.001 | NO | 1.91  | 4.75  | - | - | - | no |
| chr19 | 14116501  | 14118125  | ENSG00000132005 | RFX1    | regulatory factor exon   | 0.000 | NO | 4.68  | 6.40  | - | - | - | no |
| chr19 | 41220876  | 41222125  | ENSG00000123815 | ADCK4   | aarF domain cont exon    | 0.003 | NO | 1.13  | 2.89  | - | - | - | no |
| chr19 | 58665876  | 58667125  | ENSG00000181894 | ZNF329  | zinc finger proteir exon | 0.000 | NO | 1.49  | 4.13  | - | - | - | no |
| chr14 | 21737001  | 21738500  | ENSG00000092199 | HNRNPC  | heterogeneous ni exon    | 0.000 | NO | 7.23  | 6.40  | - | - | - | no |
| chr2  | 27578501  | 27579750  | ENSG00000115207 | GTF3C2  | general transcript exon  | 0.049 | NO | 2.34  | 3.51  | - | - | - | no |
| chr2  | 61765251  | 61766625  | ENSG00000082898 | XPO1    | exportin 1 (CRM1 exon    | 0.000 | NO | 3.62  | 4.95  | - | - | - | no |
| chr20 | 21311501  | 21312875  | ENSG00000088930 | XRN2    | 5'-3' exoribonucle exon  | 0.002 | NO | 0.57  | 1.86  | - | - | - | no |

|       |           |           |                 |          |                     |      |       |    |       |       |   |   |   |    |
|-------|-----------|-----------|-----------------|----------|---------------------|------|-------|----|-------|-------|---|---|---|----|
| chr20 | 37074751  | 37076000  | ENSG00000174365 | SNHG11   | small nucleolar R   | exon | 0.029 | NO | 0.57  | 2.68  | - | - | - | no |
| chr20 | 39743126  | 39744625  | ENSG00000198900 | TOP1     | topoisomerase (D    | exon | 0.006 | NO | 2.41  | 3.92  | - | - | - | no |
| chr20 | 39740501  | 39741750  | ENSG00000198900 | TOP1     | topoisomerase (D    | exon | 0.020 | NO | 3.05  | 4.34  | - | - | - | no |
| chr20 | 39741126  | 39742500  | ENSG00000198900 | TOP1     | topoisomerase (D    | exon | 0.023 | NO | 2.62  | 2.89  | - | - | - | no |
| chr20 | 46253376  | 46254625  | ENSG00000124151 | NCOA3    | nuclear receptor    | exon | 0.026 | NO | 7.44  | 9.29  | - | - | - | no |
| chr20 | 46262501  | 46263750  | ENSG00000124151 | NCOA3    | nuclear receptor    | exon | 0.004 | NO | 10.70 | 12.39 | - | - | - | no |
| chr20 | 46250126  | 46251500  | ENSG00000124151 | NCOA3    | nuclear receptor    | exon | 0.004 | NO | 7.87  | 8.67  | - | - | - | no |
| chr20 | 46267376  | 46268750  | ENSG00000124151 | NCOA3    | nuclear receptor    | exon | 0.000 | NO | 15.60 | 15.69 | - | - | - | no |
| chr20 | 46253876  | 46255125  | ENSG00000124151 | NCOA3    | nuclear receptor    | exon | 0.018 | NO | 9.85  | 8.88  | - | - | - | no |
| chr20 | 46265876  | 46267375  | ENSG00000124151 | NCOA3    | nuclear receptor    | exon | 0.001 | NO | 11.06 | 9.91  | - | - | - | no |
| chr20 | 46265126  | 46266500  | ENSG00000124151 | NCOA3    | nuclear receptor    | exon | 0.001 | NO | 12.26 | 10.94 | - | - | - | no |
| chr20 | 46261376  | 46262625  | ENSG00000124151 | NCOA3    | nuclear receptor    | exon | 0.018 | NO | 9.92  | 7.84  | - | - | - | no |
| chr20 | 20660501  | 20662125  | ENSG00000188559 | RALGAPAZ | Ral GTPase activa   | exon | 0.010 | NO | 0.99  | 2.27  | - | - | - | no |
| chr20 | 25492501  | 25493750  | ENSG00000101004 | NINL     | ninein-like [Sourc  | exon | 0.038 | NO | 1.70  | 1.65  | - | - | - | no |
| chr20 | 34329876  | 34331250  | ENSG00000131051 | RBM39    | RNA binding moti    | exon | 0.007 | NO | 2.41  | 4.34  | - | - | - | no |
| chr20 | 40864501  | 40865750  | ENSG00000196090 | PTPRT    | protein tyrosine    | exon | 0.048 | NO | 1.42  | 3.10  | - | - | - | no |
| chr20 | 40864126  | 40865375  | ENSG00000196090 | PTPRT    | protein tyrosine    | exon | 0.042 | NO | 1.49  | 2.89  | - | - | - | no |
| chr20 | 40863626  | 40864875  | ENSG00000196090 | PTPRT    | protein tyrosine    | exon | 0.021 | NO | 1.91  | 2.68  | - | - | - | no |
| chr3  | 15073501  | 15074750  | ENSG00000177463 | NR2C2    | nuclear receptor    | exon | 0.050 | NO | 1.28  | 2.68  | - | - | - | no |
| chr3  | 63983001  | 63984250  | ENSG00000163635 | ATXN7    | ataxin 7 [Source:   | exon | 0.011 | NO | 12.12 | 11.15 | - | - | - | no |
| chr3  | 183438626 | 183439875 | ENSG00000163872 | YEATS2   | YEATS domain core   | exon | 0.034 | NO | 0.57  | 1.45  | - | - | - | no |
| chr3  | 48129751  | 48131000  | ENSG00000047849 | MAP4     | microtubule-asso    | exon | 0.017 | NO | 1.35  | 3.30  | - | - | - | no |
| chr3  | 48754001  | 48755250  | ENSG00000068745 | IP6K2    | inositol hexakisph  | exon | 0.003 | NO | 1.49  | 2.89  | - | - | - | no |
| chr3  | 63999251  | 64001000  | ENSG00000163636 | PSMD6    | proteasome (pros    | exon | 0.000 | NO | 16.38 | 19.20 | - | - | - | no |
| chr3  | 63998751  | 64000000  | ENSG00000163636 | PSMD6    | proteasome (pros    | exon | 0.001 | NO | 10.63 | 11.77 | - | - | - | no |
| chr3  | 113415001 | 113416250 | ENSG00000176542 | KIAA2018 | KIAA2018 [Source    | exon | 0.002 | NO | 1.91  | 3.72  | - | - | - | no |
| chr3  | 114865501 | 114866750 | ENSG00000181722 | ZBTB20   | zinc finger and BT  | exon | 0.012 | NO | 1.35  | 4.34  | - | - | - | no |
| chr3  | 125093501 | 125094750 | ENSG00000163848 | ZNF148   | zinc finger proteir | exon | 0.037 | NO | 1.28  | 2.68  | - | - | - | no |
| chr1  | 202986126 | 202987375 | ENSG00000163444 | TMEM183  | transmembrane       | exon | 0.040 | NO | 1.70  | 3.10  | - | - | - | no |
| chr6  | 30180376  | 30181750  | ENSG00000234127 | TRIM26   | tripartite motif    | exon | 0.001 | NO | 1.13  | 2.48  | - | - | - | no |
| chr7  | 2691876   | 2693125   | ENSG00000136295 | TTYH3    | tweety homolog      | exon | 0.002 | NO | 0.78  | 2.48  | - | - | - | no |

|      |           |           |                 |          |                            |       |    |      |       |   |   |   |    |
|------|-----------|-----------|-----------------|----------|----------------------------|-------|----|------|-------|---|---|---|----|
| chr7 | 25164251  | 25165750  | ENSG00000172115 | CYCS     | cytochrome c, sor exon     | 0.000 | NO | 1.91 | 5.16  | - | - | - | no |
| chr7 | 32930626  | 32931875  | ENSG00000170852 | KBTBD2   | kelch repeat and lexon     | 0.017 | NO | 3.19 | 4.54  | - | - | - | no |
| chr7 | 45150626  | 45152000  | ENSG00000136270 | TBRG4    | transforming grovexon      | 0.000 | NO | 1.35 | 4.34  | - | - | - | no |
| chr8 | 101964376 | 101965875 | ENSG00000164924 | YWHAZ    | tyrosine 3-monoc exon      | 0.000 | NO | 5.74 | 10.73 | - | - | - | no |
| chr9 | 123963501 | 123964750 | ENSG00000119396 | RAB14    | RAB14, member F exon       | 0.002 | NO | 2.13 | 3.72  | - | - | - | no |
| chrX | 48957501  | 48958750  | ENSG00000196998 | WDR45    | WD repeat domai exon       | 0.008 | NO | 1.42 | 2.68  | - | - | - | no |
| chrX | 119763376 | 119764625 | ENSG00000171155 | C1GALT1C | C1GALT1-specific exon      | 0.004 | NO | 1.35 | 3.10  | - | - | - | no |
| chr5 | 68628001  | 68629375  | ENSG00000183323 | CCDC125  | coiled-coil domai exon     | 0.000 | NO | 1.49 | 3.92  | - | - | - | no |
| chr1 | 33225251  | 33226625  | ENSG00000162522 | KIAA1522 | KIAA1522 [Source intron    | 0.000 | NO | 0.78 | 5.57  | - | - | - | no |
| chr1 | 116933626 | 116934875 | ENSG00000163399 | ATP1A1   | ATPase, Na+/K+ ti intron   | 0.013 | NO | 4.18 | 4.75  | - | - | - | no |
| chr1 | 181408126 | 181409375 | ENSG00000198216 | CACNA1E  | calcium channel, i intron  | 0.028 | NO | 1.49 | 2.89  | - | - | - | no |
| chr1 | 181446501 | 181447875 | ENSG00000198216 | CACNA1E  | calcium channel, i intron  | 0.017 | NO | 2.41 | 3.30  | - | - | - | no |
| chr1 | 58487751  | 58489000  | ENSG00000173406 | DAB1     | Dab, reelin signal intron  | 0.013 | NO | 0.99 | 1.65  | - | - | - | no |
| chr1 | 112413876 | 112415125 | ENSG00000171385 | KCND3    | potassium voltage intron   | 0.007 | NO | 3.54 | 5.57  | - | - | - | no |
| chr1 | 112450126 | 112451375 | ENSG00000171385 | KCND3    | potassium voltage intron   | 0.030 | NO | 3.40 | 3.51  | - | - | - | no |
| chr1 | 114990376 | 114991875 | ENSG00000197323 | TRIM33   | tripartite motif cc intron | 0.020 | NO | 6.17 | 7.84  | - | - | - | no |
| chr1 | 115038001 | 115039375 | ENSG00000197323 | TRIM33   | tripartite motif cc intron | 0.002 | NO | 5.25 | 5.57  | - | - | - | no |
| chr1 | 116304126 | 116305375 | ENSG00000118729 | CASQ2    | calsequestrin 2 (c intron  | 0.005 | NO | 2.06 | 5.57  | - | - | - | no |
| chr1 | 145008876 | 145010250 | ENSG00000178104 | PDE4DIP  | phosphodiesteras intron    | 0.001 | NO | 3.76 | 6.81  | - | - | - | no |
| chr1 | 145034501 | 145035875 | ENSG00000178104 | PDE4DIP  | phosphodiesteras intron    | 0.002 | NO | 2.84 | 4.95  | - | - | - | no |
| chr1 | 145025126 | 145026500 | ENSG00000178104 | PDE4DIP  | phosphodiesteras intron    | 0.003 | NO | 6.10 | 7.23  | - | - | - | no |
| chr1 | 145041251 | 145042625 | ENSG00000178104 | PDE4DIP  | phosphodiesteras intron    | 0.026 | NO | 5.60 | 5.57  | - | - | - | no |
| chr1 | 145001001 | 145002250 | ENSG00000178104 | PDE4DIP  | phosphodiesteras intron    | 0.036 | NO | 5.81 | 5.37  | - | - | - | no |
| chr1 | 145010376 | 145011625 | ENSG00000178104 | PDE4DIP  | phosphodiesteras intron    | 0.026 | NO | 2.62 | 2.27  | - | - | - | no |
| chr1 | 145023376 | 145024625 | ENSG00000178104 | PDE4DIP  | phosphodiesteras intron    | 0.049 | NO | 5.81 | 4.95  | - | - | - | no |
| chr1 | 144987376 | 144988625 | ENSG00000178104 | PDE4DIP  | phosphodiesteras intron    | 0.041 | NO | 4.75 | 3.92  | - | - | - | no |
| chr1 | 144943251 | 144944500 | ENSG00000178104 | PDE4DIP  | phosphodiesteras intron    | 0.042 | NO | 3.69 | 2.89  | - | - | - | no |
| chr1 | 167048501 | 167049750 | ENSG00000143167 | GPA33    | glycoprotein A33 intron    | 0.047 | NO | 0.85 | 2.27  | - | - | - | no |
| chr1 | 175491626 | 175492875 | ENSG00000116147 | TNR      | tenascin R [Source intron  | 0.045 | NO | 0.50 | 2.68  | - | - | - | no |
| chr1 | 216525751 | 216527000 | ENSG00000042781 | USH2A    | Usher syndrome i intron    | 0.048 | NO | 1.84 | 4.13  | - | - | - | no |
| chr1 | 216885626 | 216886875 | ENSG00000196482 | ESRRG    | estrogen-related intron    | 0.037 | NO | 2.27 | 2.68  | - | - | - | no |

|       |          |          |                 |         |                            |       |    |       |       |   |   |   |    |
|-------|----------|----------|-----------------|---------|----------------------------|-------|----|-------|-------|---|---|---|----|
| chr10 | 5700501  | 5701750  | ENSG00000196372 | ASB13   | ankyrin repeat an intron   | 0.019 | NO | 0.99  | 3.92  | - | - | - | no |
| chr11 | 63280751 | 63282000 | ENSG00000133317 | LGALS12 | lectin, galactoside intron | 0.003 | NO | 0.71  | 2.48  | - | - | - | no |
| chr11 | 69469251 | 69470500 | ENSG00000149716 | ORAOV1  | oral cancer overe intron   | 0.000 | NO | 4.18  | 5.16  | - | - | - | no |
| chr11 | 70883876 | 70885125 | ENSG00000162105 | SHANK2  | SH3 and multiple intron    | 0.018 | NO | 1.06  | 3.10  | - | - | - | no |
| chr15 | 49961001 | 49962250 | ENSG00000140285 | FGF7    | fibroblast growth intron   | 0.035 | NO | 1.91  | 4.13  | - | - | - | no |
| chr15 | 50046626 | 50047875 | ENSG00000140285 | FGF7    | fibroblast growth intron   | 0.023 | NO | 1.70  | 2.89  | - | - | - | no |
| chr15 | 54327501 | 54328750 | ENSG00000137766 | UNC13C  | unc-13 homolog ( intron    | 0.045 | NO | 1.70  | 4.54  | - | - | - | no |
| chr15 | 54310001 | 54311250 | ENSG00000137766 | UNC13C  | unc-13 homolog ( intron    | 0.029 | NO | 2.62  | 3.51  | - | - | - | no |
| chr16 | 88994376 | 88995625 | ENSG00000129993 | CBFA2T3 | core-binding fact intron   | 0.033 | NO | 1.49  | 4.34  | - | - | - | no |
| chr17 | 11321376 | 11322625 | ENSG00000188803 | SHISA6  | shisa homolog 6 ( intron   | 0.003 | NO | 0.14  | 1.65  | - | - | - | no |
| chr17 | 57973751 | 57975000 | ENSG00000108443 | RPS6KB1 | ribosomal protein intron   | 0.005 | NO | 9.07  | 11.97 | - | - | - | no |
| chr17 | 1698751  | 1700000  | ENSG00000186532 | SMYD4   | SET and MYND dc intron     | 0.026 | NO | 0.00  | 1.45  | - | - | - | no |
| chr17 | 57134751 | 57136125 | ENSG00000108395 | TRIM37  | tripartite motif cc intron | 0.002 | NO | 1.84  | 3.72  | - | - | - | no |
| chr17 | 57114501 | 57115750 | ENSG00000108395 | TRIM37  | tripartite motif cc intron | 0.000 | NO | 5.39  | 6.81  | - | - | - | no |
| chr17 | 57077001 | 57078250 | ENSG00000108395 | TRIM37  | tripartite motif cc intron | 0.023 | NO | 7.09  | 8.46  | - | - | - | no |
| chr17 | 57170501 | 57171750 | ENSG00000108395 | TRIM37  | tripartite motif cc intron | 0.021 | NO | 8.44  | 9.08  | - | - | - | no |
| chr17 | 57095001 | 57096375 | ENSG00000108395 | TRIM37  | tripartite motif cc intron | 0.004 | NO | 5.03  | 5.37  | - | - | - | no |
| chr17 | 57138626 | 57139875 | ENSG00000108395 | TRIM37  | tripartite motif cc intron | 0.044 | NO | 9.71  | 8.46  | - | - | - | no |
| chr17 | 58138126 | 58139375 | ENSG00000068097 | HEATR6  | HEAT repeat cont intron    | 0.007 | NO | 8.86  | 12.18 | - | - | - | no |
| chr17 | 58145501 | 58146750 | ENSG00000068097 | HEATR6  | HEAT repeat cont intron    | 0.042 | NO | 9.50  | 12.80 | - | - | - | no |
| chr17 | 58557376 | 58558625 | ENSG00000062725 | APPBP2  | amyloid beta prec intron   | 0.043 | NO | 8.44  | 8.05  | - | - | - | no |
| chr17 | 59963751 | 59965000 | ENSG00000108506 | INTS2   | integrator comple intron   | 0.010 | NO | 9.15  | 10.32 | - | - | - | no |
| chr17 | 60078376 | 60079750 | ENSG00000108510 | MED13   | mediator comple intron     | 0.013 | NO | 14.32 | 14.24 | - | - | - | no |
| chr17 | 60094876 | 60096125 | ENSG00000108510 | MED13   | mediator comple intron     | 0.027 | NO | 11.70 | 6.19  | - | - | - | no |
| chr17 | 71362251 | 71363500 | ENSG00000069188 | SDK2    | sidekick cell adhe intron  | 0.040 | NO | 0.64  | 1.86  | - | - | - | no |
| chr19 | 50489876 | 50491250 | ENSG00000105053 | VRK3    | vaccinia related k intron  | 0.003 | NO | 2.69  | 2.68  | - | - | - | no |
| chr2  | 71804501 | 71805750 | ENSG00000135636 | DYSF    | dysferlin, limb gir intron | 0.018 | NO | 0.64  | 2.06  | - | - | - | no |
| chr20 | 2105501  | 2106875  | ENSG00000125834 | STK35   | serine/threonine intron    | 0.025 | NO | 0.50  | 2.06  | - | - | - | no |
| chr20 | 10416751 | 10418250 | ENSG00000149346 | SLX4IP  | SLX4 interacting p intron  | 0.000 | NO | 0.64  | 1.65  | - | - | - | no |
| chr20 | 12994876 | 12996250 | ENSG00000172296 | SPTLC3  | serine palmitoyltr intron  | 0.001 | NO | 1.13  | 2.68  | - | - | - | no |
| chr20 | 14647126 | 14648625 | ENSG00000172264 | MACROD2 | MACRO domain c intron      | 0.001 | NO | 0.35  | 2.89  | - | - | - | no |

|       |          |          |                 |         |                           |       |    |       |       |   |   |   |    |
|-------|----------|----------|-----------------|---------|---------------------------|-------|----|-------|-------|---|---|---|----|
| chr20 | 14322001 | 14323375 | ENSG00000172264 | MACROD2 | MACRO domain c intron     | 0.001 | NO | 0.43  | 1.86  | - | - | - | no |
| chr20 | 14145751 | 14147250 | ENSG00000172264 | MACROD2 | MACRO domain c intron     | 0.000 | NO | 0.78  | 1.86  | - | - | - | no |
| chr20 | 15245126 | 15246500 | ENSG00000172264 | MACROD2 | MACRO domain c intron     | 0.003 | NO | 1.13  | 2.48  | - | - | - | no |
| chr20 | 24614126 | 24615375 | ENSG00000101463 | SYNDIG1 | synapse different intron  | 0.023 | NO | 1.21  | 2.27  | - | - | - | no |
| chr20 | 24617501 | 24618750 | ENSG00000101463 | SYNDIG1 | synapse different intron  | 0.015 | NO | 0.99  | 1.45  | - | - | - | no |
| chr20 | 24506251 | 24507625 | ENSG00000101463 | SYNDIG1 | synapse different intron  | 0.000 | NO | 0.99  | 1.24  | - | - | - | no |
| chr20 | 30557876 | 30559375 | ENSG00000101321 | XKR7    | XK, Kell blood gro intron | 0.000 | NO | 0.85  | 2.06  | - | - | - | no |
| chr20 | 39732626 | 39733875 | ENSG00000198900 | TOP1    | topoisomerase (D intron   | 0.009 | NO | 2.48  | 4.34  | - | - | - | no |
| chr20 | 39738751 | 39740000 | ENSG00000198900 | TOP1    | topoisomerase (D intron   | 0.028 | NO | 2.06  | 3.51  | - | - | - | no |
| chr20 | 39710001 | 39711375 | ENSG00000198900 | TOP1    | topoisomerase (D intron   | 0.016 | NO | 3.05  | 3.72  | - | - | - | no |
| chr20 | 39710626 | 39712000 | ENSG00000198900 | TOP1    | topoisomerase (D intron   | 0.003 | NO | 3.19  | 3.72  | - | - | - | no |
| chr20 | 43522751 | 43524500 | ENSG00000166913 | YWHAB   | tyrosine 3-monoc intron   | 0.001 | NO | 1.84  | 3.10  | - | - | - | no |
| chr20 | 44563876 | 44565125 | ENSG00000100982 | PCIF1   | PDX1 C-terminal i intron  | 0.009 | NO | 2.13  | 3.30  | - | - | - | no |
| chr20 | 45785501 | 45786750 | ENSG00000064655 | EYA2    | eyes absent hom c intron  | 0.017 | NO | 11.06 | 12.39 | - | - | - | no |
| chr20 | 46142501 | 46143750 | ENSG00000124151 | NCOA3   | nuclear receptor i intron | 0.042 | NO | 3.62  | 4.95  | - | - | - | no |
| chr20 | 46168001 | 46169250 | ENSG00000124151 | NCOA3   | nuclear receptor i intron | 0.025 | NO | 7.23  | 8.88  | - | - | - | no |
| chr20 | 46227001 | 46228375 | ENSG00000124151 | NCOA3   | nuclear receptor i intron | 0.000 | NO | 5.39  | 6.61  | - | - | - | no |
| chr20 | 46224126 | 46225375 | ENSG00000124151 | NCOA3   | nuclear receptor i intron | 0.041 | NO | 7.51  | 9.08  | - | - | - | no |
| chr20 | 46179626 | 46181250 | ENSG00000124151 | NCOA3   | nuclear receptor i intron | 0.001 | NO | 13.97 | 16.10 | - | - | - | no |
| chr20 | 46159626 | 46160875 | ENSG00000124151 | NCOA3   | nuclear receptor i intron | 0.048 | NO | 11.41 | 11.97 | - | - | - | no |
| chr20 | 46227876 | 46229125 | ENSG00000124151 | NCOA3   | nuclear receptor i intron | 0.026 | NO | 6.52  | 6.81  | - | - | - | no |
| chr20 | 46167626 | 46168875 | ENSG00000124151 | NCOA3   | nuclear receptor i intron | 0.025 | NO | 8.72  | 9.08  | - | - | - | no |
| chr20 | 46180626 | 46182000 | ENSG00000124151 | NCOA3   | nuclear receptor i intron | 0.025 | NO | 9.71  | 9.91  | - | - | - | no |
| chr20 | 46179001 | 46180500 | ENSG00000124151 | NCOA3   | nuclear receptor i intron | 0.005 | NO | 11.77 | 11.97 | - | - | - | no |
| chr20 | 46271626 | 46272875 | ENSG00000124151 | NCOA3   | nuclear receptor i intron | 0.041 | NO | 7.51  | 7.64  | - | - | - | no |
| chr20 | 46141876 | 46143125 | ENSG00000124151 | NCOA3   | nuclear receptor i intron | 0.047 | NO | 5.10  | 5.16  | - | - | - | no |
| chr20 | 46231251 | 46232500 | ENSG00000124151 | NCOA3   | nuclear receptor i intron | 0.019 | NO | 8.37  | 8.26  | - | - | - | no |
| chr20 | 46242626 | 46243875 | ENSG00000124151 | NCOA3   | nuclear receptor i intron | 0.023 | NO | 12.48 | 12.18 | - | - | - | no |
| chr20 | 46228876 | 46230375 | ENSG00000124151 | NCOA3   | nuclear receptor i intron | 0.000 | NO | 6.88  | 6.61  | - | - | - | no |
| chr20 | 46202501 | 46203750 | ENSG00000124151 | NCOA3   | nuclear receptor i intron | 0.000 | NO | 12.26 | 11.77 | - | - | - | no |
| chr20 | 46221126 | 46222375 | ENSG00000124151 | NCOA3   | nuclear receptor i intron | 0.040 | NO | 7.23  | 6.40  | - | - | - | no |

|       |          |          |                 |       |                          |       |    |       |       |   |   |   |    |
|-------|----------|----------|-----------------|-------|--------------------------|-------|----|-------|-------|---|---|---|----|
| chr20 | 46248876 | 46250125 | ENSG00000124151 | NCOA3 | nuclear receptor (intron | 0.006 | NO | 7.73  | 6.81  | - | - | - | no |
| chr20 | 46221876 | 46223125 | ENSG00000124151 | NCOA3 | nuclear receptor (intron | 0.010 | NO | 5.46  | 4.75  | - | - | - | no |
| chr20 | 46269126 | 46270375 | ENSG00000124151 | NCOA3 | nuclear receptor (intron | 0.040 | NO | 7.02  | 5.99  | - | - | - | no |
| chr20 | 46206001 | 46207375 | ENSG00000124151 | NCOA3 | nuclear receptor (intron | 0.004 | NO | 10.85 | 8.88  | - | - | - | no |
| chr20 | 46230251 | 46231500 | ENSG00000124151 | NCOA3 | nuclear receptor (intron | 0.028 | NO | 10.35 | 8.26  | - | - | - | no |
| chr20 | 46246001 | 46247250 | ENSG00000124151 | NCOA3 | nuclear receptor (intron | 0.029 | NO | 6.73  | 5.37  | - | - | - | no |
| chr20 | 46237126 | 46238375 | ENSG00000124151 | NCOA3 | nuclear receptor (intron | 0.048 | NO | 8.65  | 6.61  | - | - | - | no |
| chr20 | 46184876 | 46186250 | ENSG00000124151 | NCOA3 | nuclear receptor (intron | 0.018 | NO | 10.56 | 7.64  | - | - | - | no |
| chr20 | 46203626 | 46205000 | ENSG00000124151 | NCOA3 | nuclear receptor (intron | 0.010 | NO | 14.32 | 9.70  | - | - | - | no |
| chr20 | 46244876 | 46246250 | ENSG00000124151 | NCOA3 | nuclear receptor (intron | 0.004 | NO | 7.80  | 5.16  | - | - | - | no |
| chr20 | 46165376 | 46166625 | ENSG00000124151 | NCOA3 | nuclear receptor (intron | 0.048 | NO | 5.67  | 3.30  | - | - | - | no |
| chr20 | 53125626 | 53126875 | ENSG00000101134 | DOK5  | docking protein 5 intron | 0.018 | NO | 3.90  | 6.61  | - | - | - | no |
| chr20 | 53135126 | 53136875 | ENSG00000101134 | DOK5  | docking protein 5 intron | 0.000 | NO | 7.02  | 11.77 | - | - | - | no |
| chr20 | 53164126 | 53165875 | ENSG00000101134 | DOK5  | docking protein 5 intron | 0.018 | NO | 8.37  | 12.80 | - | - | - | no |
| chr20 | 53122876 | 53124125 | ENSG00000101134 | DOK5  | docking protein 5 intron | 0.016 | NO | 4.82  | 7.23  | - | - | - | no |
| chr20 | 53223876 | 53225375 | ENSG00000101134 | DOK5  | docking protein 5 intron | 0.000 | NO | 5.67  | 8.46  | - | - | - | no |
| chr20 | 53146626 | 53148000 | ENSG00000101134 | DOK5  | docking protein 5 intron | 0.026 | NO | 8.93  | 12.59 | - | - | - | no |
| chr20 | 53206876 | 53208125 | ENSG00000101134 | DOK5  | docking protein 5 intron | 0.018 | NO | 7.94  | 11.15 | - | - | - | no |
| chr20 | 53158626 | 53160250 | ENSG00000101134 | DOK5  | docking protein 5 intron | 0.000 | NO | 9.85  | 13.83 | - | - | - | no |
| chr20 | 53183501 | 53184750 | ENSG00000101134 | DOK5  | docking protein 5 intron | 0.011 | NO | 4.32  | 5.99  | - | - | - | no |
| chr20 | 53233126 | 53234500 | ENSG00000101134 | DOK5  | docking protein 5 intron | 0.029 | NO | 4.96  | 6.81  | - | - | - | no |
| chr20 | 53126251 | 53127500 | ENSG00000101134 | DOK5  | docking protein 5 intron | 0.019 | NO | 8.44  | 11.56 | - | - | - | no |
| chr20 | 53242376 | 53243750 | ENSG00000101134 | DOK5  | docking protein 5 intron | 0.000 | NO | 8.93  | 11.97 | - | - | - | no |
| chr20 | 53113376 | 53115000 | ENSG00000101134 | DOK5  | docking protein 5 intron | 0.003 | NO | 10.99 | 14.24 | - | - | - | no |
| chr20 | 53128126 | 53129375 | ENSG00000101134 | DOK5  | docking protein 5 intron | 0.010 | NO | 9.85  | 12.59 | - | - | - | no |
| chr20 | 53115876 | 53117500 | ENSG00000101134 | DOK5  | docking protein 5 intron | 0.004 | NO | 10.21 | 13.01 | - | - | - | no |
| chr20 | 53116626 | 53117875 | ENSG00000101134 | DOK5  | docking protein 5 intron | 0.015 | NO | 4.89  | 6.19  | - | - | - | no |
| chr20 | 53184126 | 53185375 | ENSG00000101134 | DOK5  | docking protein 5 intron | 0.003 | NO | 5.32  | 6.61  | - | - | - | no |
| chr20 | 53192126 | 53193375 | ENSG00000101134 | DOK5  | docking protein 5 intron | 0.024 | NO | 6.66  | 8.26  | - | - | - | no |
| chr20 | 53153126 | 53154625 | ENSG00000101134 | DOK5  | docking protein 5 intron | 0.001 | NO | 8.72  | 10.73 | - | - | - | no |
| chr20 | 53211876 | 53213125 | ENSG00000101134 | DOK5  | docking protein 5 intron | 0.047 | NO | 10.14 | 12.18 | - | - | - | no |

|       |          |          |                 |           |                                      |       |    |       |       |   |   |   |    |
|-------|----------|----------|-----------------|-----------|--------------------------------------|-------|----|-------|-------|---|---|---|----|
| chr20 | 53257501 | 53258750 | ENSG00000101134 | DOK5      | docking protein 5 intron             | 0.011 | NO | 8.58  | 10.12 | - | - | - | no |
| chr20 | 53215126 | 53216500 | ENSG00000101134 | DOK5      | docking protein 5 intron             | 0.010 | NO | 10.28 | 11.97 | - | - | - | no |
| chr20 | 53246626 | 53248250 | ENSG00000101134 | DOK5      | docking protein 5 intron             | 0.018 | NO | 9.15  | 10.53 | - | - | - | no |
| chr20 | 53112751 | 53114000 | ENSG00000101134 | DOK5      | docking protein 5 intron             | 0.017 | NO | 7.51  | 8.46  | - | - | - | no |
| chr20 | 53143126 | 53144375 | ENSG00000101134 | DOK5      | docking protein 5 intron             | 0.049 | NO | 10.14 | 11.35 | - | - | - | no |
| chr20 | 53176126 | 53177750 | ENSG00000101134 | DOK5      | docking protein 5 intron             | 0.000 | NO | 11.13 | 12.39 | - | - | - | no |
| chr20 | 53114251 | 53115625 | ENSG00000101134 | DOK5      | docking protein 5 intron             | 0.023 | NO | 11.34 | 12.39 | - | - | - | no |
| chr20 | 53094751 | 53096125 | ENSG00000101134 | DOK5      | docking protein 5 intron             | 0.009 | NO | 10.00 | 10.73 | - | - | - | no |
| chr20 | 53193126 | 53194625 | ENSG00000101134 | DOK5      | docking protein 5 intron             | 0.000 | NO | 12.69 | 13.62 | - | - | - | no |
| chr20 | 53105001 | 53106625 | ENSG00000101134 | DOK5      | docking protein 5 intron             | 0.003 | NO | 10.42 | 11.15 | - | - | - | no |
| chr20 | 53194876 | 53196250 | ENSG00000101134 | DOK5      | docking protein 5 intron             | 0.004 | NO | 7.16  | 7.64  | - | - | - | no |
| chr20 | 53174376 | 53175875 | ENSG00000101134 | DOK5      | docking protein 5 intron             | 0.018 | NO | 10.85 | 11.56 | - | - | - | no |
| chr20 | 53173876 | 53175125 | ENSG00000101134 | DOK5      | docking protein 5 intron             | 0.047 | NO | 8.93  | 9.50  | - | - | - | no |
| chr20 | 53114876 | 53116125 | ENSG00000101134 | DOK5      | docking protein 5 intron             | 0.047 | NO | 11.56 | 12.18 | - | - | - | no |
| chr20 | 53103751 | 53105125 | ENSG00000101134 | DOK5      | docking protein 5 intron             | 0.019 | NO | 11.34 | 11.56 | - | - | - | no |
| chr20 | 53257001 | 53258250 | ENSG00000101134 | DOK5      | docking protein 5 intron             | 0.018 | NO | 8.93  | 9.08  | - | - | - | no |
| chr20 | 53248376 | 53249625 | ENSG00000101134 | DOK5      | docking protein 5 intron             | 0.016 | NO | 6.59  | 6.61  | - | - | - | no |
| chr20 | 53147376 | 53148625 | ENSG00000101134 | DOK5      | docking protein 5 intron             | 0.048 | NO | 11.34 | 10.94 | - | - | - | no |
| chr20 | 53206251 | 53207625 | ENSG00000101134 | DOK5      | docking protein 5 intron             | 0.005 | NO | 10.99 | 10.32 | - | - | - | no |
| chr20 | 53103251 | 53104500 | ENSG00000101134 | DOK5      | docking protein 5 intron             | 0.025 | NO | 10.63 | 9.91  | - | - | - | no |
| chr20 | 53137376 | 53138625 | ENSG00000101134 | DOK5      | docking protein 5 intron             | 0.040 | NO | 8.51  | 7.84  | - | - | - | no |
| chr20 | 53118376 | 53119625 | ENSG00000101134 | DOK5      | docking protein 5 intron             | 0.023 | NO | 9.57  | 8.67  | - | - | - | no |
| chr20 | 53245251 | 53246500 | ENSG00000101134 | DOK5      | docking protein 5 intron             | 0.028 | NO | 12.05 | 10.53 | - | - | - | no |
| chr20 | 53106251 | 53107500 | ENSG00000101134 | DOK5      | docking protein 5 intron             | 0.043 | NO | 9.57  | 7.64  | - | - | - | no |
| chr20 | 56931501 | 56932750 | ENSG00000124209 | RAB22A    | RAB22A, member intron                | 0.004 | NO | 1.49  | 3.10  | - | - | - | no |
| chr20 | 57259751 | 57261125 | ENSG00000254995 | STX16-NPI | STX16-NPEPL1 re:intron               | 0.004 | NO | 2.20  | 4.13  | - | - | - | no |
| chr20 | 25525001 | 25526250 | ENSG00000101004 | NINL      | ninein-like [Source: Ensembl] intron | 0.038 | NO | 0.50  | 1.86  | - | - | - | no |
| chr20 | 40170251 | 40171500 | ENSG00000124177 | CHD6      | chromodomain h intron                | 0.006 | NO | 1.35  | 3.51  | - | - | - | no |
| chr20 | 40169251 | 40170625 | ENSG00000124177 | CHD6      | chromodomain h intron                | 0.000 | NO | 1.98  | 3.92  | - | - | - | no |
| chr20 | 40199876 | 40201375 | ENSG00000124177 | CHD6      | chromodomain h intron                | 0.002 | NO | 2.06  | 3.30  | - | - | - | no |
| chr20 | 40139376 | 40140625 | ENSG00000124177 | CHD6      | chromodomain h intron                | 0.040 | NO | 2.34  | 2.27  | - | - | - | no |



|       |          |          |                 |       |                                 |       |    |      |      |   |   |   |    |
|-------|----------|----------|-----------------|-------|---------------------------------|-------|----|------|------|---|---|---|----|
| chr20 | 41087376 | 41088750 | ENSG00000196090 | PTPRT | protein tyrosine $\zeta$ intron | 0.025 | NO | 1.91 | 5.16 | - | - | - | no |
| chr20 | 41086751 | 41088000 | ENSG00000196090 | PTPRT | protein tyrosine $\zeta$ intron | 0.016 | NO | 2.13 | 5.16 | - | - | - | no |
| chr20 | 40775126 | 40776750 | ENSG00000196090 | PTPRT | protein tyrosine $\zeta$ intron | 0.004 | NO | 2.55 | 5.78 | - | - | - | no |
| chr20 | 40720251 | 40721625 | ENSG00000196090 | PTPRT | protein tyrosine $\zeta$ intron | 0.016 | NO | 1.56 | 3.30 | - | - | - | no |
| chr20 | 40903501 | 40905000 | ENSG00000196090 | PTPRT | protein tyrosine $\zeta$ intron | 0.003 | NO | 1.49 | 3.10 | - | - | - | no |
| chr20 | 41027876 | 41029750 | ENSG00000196090 | PTPRT | protein tyrosine $\zeta$ intron | 0.000 | NO | 1.84 | 3.72 | - | - | - | no |
| chr20 | 41122251 | 41123625 | ENSG00000196090 | PTPRT | protein tyrosine $\zeta$ intron | 0.000 | NO | 2.34 | 2.68 | - | - | - | no |
| chr20 | 40831626 | 40833000 | ENSG00000196090 | PTPRT | protein tyrosine $\zeta$ intron | 0.005 | NO | 4.40 | 4.95 | - | - | - | no |
| chr22 | 19450501 | 19451750 | ENSG00000070010 | UFD1L | ubiquitin fusion d intron       | 0.028 | NO | 0.50 | 2.06 | - | - | - | no |
| chr3  | 1421876  | 1423125  | ENSG00000134115 | CNTN6 | contactin 6 [Source: intron     | 0.021 | NO | 1.06 | 3.30 | - | - | - | no |
| chr3  | 2854751  | 2856000  | ENSG00000144619 | CNTN4 | contactin 4 [Source: intron     | 0.043 | NO | 0.92 | 2.27 | - | - | - | no |
| chr3  | 2277126  | 2278625  | ENSG00000144619 | CNTN4 | contactin 4 [Source: intron     | 0.037 | NO | 1.28 | 2.89 | - | - | - | no |
| chr3  | 7102376  | 7103625  | ENSG00000196277 | GRM7  | glutamate recepti intron        | 0.040 | NO | 0.78 | 3.30 | - | - | - | no |
| chr3  | 7730251  | 7731500  | ENSG00000196277 | GRM7  | glutamate recepti intron        | 0.025 | NO | 1.42 | 3.51 | - | - | - | no |
| chr3  | 7641001  | 7642250  | ENSG00000196277 | GRM7  | glutamate recepti intron        | 0.025 | NO | 1.42 | 2.48 | - | - | - | no |
| chr3  | 9461126  | 9462375  | ENSG00000168137 | SETD5 | SET domain conta intron         | 0.041 | NO | 0.92 | 2.68 | - | - | - | no |
| chr3  | 19219251 | 19220500 | ENSG00000183960 | KCNH8 | potassium voltage intron        | 0.044 | NO | 1.13 | 2.89 | - | - | - | no |
| chr3  | 38238876 | 38240125 | ENSG00000172939 | OXSRI | oxidative-stress r intron       | 0.049 | NO | 0.92 | 2.06 | - | - | - | no |
| chr3  | 50051126 | 50052375 | ENSG00000004534 | RBM6  | RNA binding moti intron         | 0.029 | NO | 0.14 | 1.45 | - | - | - | no |
| chr3  | 63215501 | 63216750 | ENSG00000163630 | SYNPR | synaptoporin [Soi intron        | 0.003 | NO | 3.90 | 7.23 | - | - | - | no |
| chr3  | 63455751 | 63457000 | ENSG00000163630 | SYNPR | synaptoporin [Soi intron        | 0.004 | NO | 3.69 | 6.81 | - | - | - | no |
| chr3  | 63220751 | 63222000 | ENSG00000163630 | SYNPR | synaptoporin [Soi intron        | 0.012 | NO | 3.33 | 5.99 | - | - | - | no |
| chr3  | 63220251 | 63221500 | ENSG00000163630 | SYNPR | synaptoporin [Soi intron        | 0.004 | NO | 3.90 | 6.61 | - | - | - | no |
| chr3  | 63566001 | 63567250 | ENSG00000163630 | SYNPR | synaptoporin [Soi intron        | 0.009 | NO | 4.61 | 6.19 | - | - | - | no |
| chr3  | 63376251 | 63377750 | ENSG00000163630 | SYNPR | synaptoporin [Soi intron        | 0.004 | NO | 5.74 | 7.43 | - | - | - | no |
| chr3  | 63512001 | 63513250 | ENSG00000163630 | SYNPR | synaptoporin [Soi intron        | 0.006 | NO | 5.46 | 7.02 | - | - | - | no |
| chr3  | 63919501 | 63920750 | ENSG00000163635 | ATXN7 | ataxin 7 [Source: f intron      | 0.022 | NO | 7.16 | 8.26 | - | - | - | no |
| chr3  | 63919001 | 63920250 | ENSG00000163635 | ATXN7 | ataxin 7 [Source: f intron      | 0.030 | NO | 7.73 | 7.64 | - | - | - | no |
| chr3  | 63894751 | 63896250 | ENSG00000163635 | ATXN7 | ataxin 7 [Source: f intron      | 0.008 | NO | 7.59 | 7.43 | - | - | - | no |
| chr3  | 77448126 | 77449375 | ENSG00000185008 | ROBO2 | roundabout, axor intron         | 0.031 | NO | 0.64 | 2.68 | - | - | - | no |
| chr3  | 85291126 | 85292375 | ENSG00000175161 | CADM2 | cell adhesion mol intron        | 0.032 | NO | 0.21 | 1.45 | - | - | - | no |

|       |           |           |                 |               |                                            |                |       |    |      |      |   |   |   |    |
|-------|-----------|-----------|-----------------|---------------|--------------------------------------------|----------------|-------|----|------|------|---|---|---|----|
| chr3  | 85714126  | 85715375  | ENSG00000175161 | CADM2         | cell adhesion mol                          | intron         | 0.032 | NO | 0.35 | 1.86 | - | - | - | no |
| chr3  | 86022126  | 86023375  | ENSG00000175161 | CADM2         | cell adhesion mol                          | intron         | 0.032 | NO | 0.85 | 2.06 | - | - | - | no |
| chr3  | 97124876  | 97126125  | ENSG00000080224 | EPHA6         | EPH receptor A6                            | [intron        | 0.032 | NO | 0.28 | 2.06 | - | - | - | no |
| chr3  | 107365626 | 107366875 | ENSG00000114439 | BBX           | bobby sox homol                            | intron         | 0.033 | NO | 0.50 | 2.68 | - | - | - | no |
| chr3  | 151473126 | 151474375 | ENSG00000197953 | AADACL2       | arylacetamide de                           | intron         | 0.034 | NO | 1.42 | 2.48 | - | - | - | no |
| chr3  | 158722376 | 158723625 | ENSG00000214216 | IQCJ          | IQ motif containir                         | intron         | 0.034 | NO | 0.99 | 2.89 | - | - | - | no |
| chr3  | 160645501 | 160646750 | ENSG00000163590 | PPM1L         | protein phosphat                           | intron         | 0.015 | NO | 0.71 | 2.48 | - | - | - | no |
| chr3  | 17970501  | 17971750  | ENSG00000131374 | TBC1D5        | TBC1 domain fam                            | intron         | 0.043 | NO | 0.50 | 2.27 | - | - | - | no |
| chr3  | 18246376  | 18247625  | ENSG00000131374 | TBC1D5        | TBC1 domain fam                            | intron         | 0.026 | NO | 0.71 | 2.06 | - | - | - | no |
| chr3  | 18429876  | 18431125  | ENSG00000131374 | TBC1D5        | TBC1 domain fam                            | intron         | 0.042 | NO | 0.99 | 2.27 | - | - | - | no |
| chr3  | 25768126  | 25769375  | ENSG00000151092 | NGLY1         | N-glycanase 1                              | [So intron     | 0.046 | NO | 1.13 | 1.86 | - | - | - | no |
| chr3  | 118677501 | 118678750 | ENSG00000144847 | IGSF11        | immunoglobulin s                           | intron         | 0.018 | NO | 0.57 | 1.86 | - | - | - | no |
| chr3  | 131660126 | 131661375 | ENSG00000196353 | CPNE4         | copine IV                                  | [Source intron | 0.033 | NO | 0.99 | 1.65 | - | - | - | no |
| chr3  | 137801001 | 137802250 | ENSG00000158163 | DZIP1L        | DAZ interacting p                          | intron         | 0.013 | NO | 1.06 | 2.27 | - | - | - | no |
| chr3  | 139240251 | 139241500 | ENSG00000114115 | RBP1          | retinol binding pr                         | intron         | 0.037 | NO | 0.85 | 2.06 | - | - | - | no |
| chr3  | 165506001 | 165507250 | ENSG00000114200 | BCHE          | butyrylcholineste                          | intron         | 0.026 | NO | 0.99 | 2.48 | - | - | - | no |
| chr3  | 170736876 | 170738125 | ENSG00000163581 | SLC2A2        | solute carrier fam                         | intron         | 0.034 | NO | 0.85 | 3.30 | - | - | - | no |
| chr3  | 197411501 | 197412750 | ENSG00000145016 | KIAA0226      | KIAA0226                                   | [Source intron | 0.016 | NO | 1.28 | 3.72 | - | - | - | no |
| chr4  | 144437126 | 144438375 | ENSG00000153147 | SMARCA5       | SWI/SNF related,                           | intron         | 0.034 | NO | 0.64 | 2.68 | - | - | - | no |
| chr4  | 148990376 | 148991625 | ENSG00000071205 | ARHGAP11      | Rho GTPase activi                          | intron         | 0.040 | NO | 0.28 | 2.27 | - | - | - | no |
| chr4  | 174464001 | 174465250 | ENSG00000237125 | RP11-471J12.1 |                                            | intron         | 0.005 | NO | 0.28 | 2.06 | - | - | - | no |
| chr4  | 5618376   | 5619750   | ENSG00000173040 | EVC2          | Ellis van Creveld s                        | intron         | 0.006 | NO | 0.50 | 2.27 | - | - | - | no |
| chr4  | 155258001 | 155259375 | ENSG00000197410 | DCHS2         | dachsous 2 (Dros                           | intron         | 0.017 | NO | 1.13 | 1.65 | - | - | - | no |
| chr6  | 7112001   | 7113250   | ENSG00000124782 | RREB1         | ras responsive ele                         | intron         | 0.026 | NO | 0.85 | 2.06 | - | - | - | no |
| chr7  | 1571001   | 1572250   | ENSG00000198517 | MAFK          | v-maf musculoapi                           | intron         | 0.006 | NO | 2.76 | 4.95 | - | - | - | no |
| chr8  | 121682126 | 121683375 | ENSG00000172164 | SNTB1         | syntrophin, beta                           | intron         | 0.019 | NO | 1.28 | 2.27 | - | - | - | no |
| chr1  | 116913751 | 116915125 | ENSG00000163399 | ATP1A1        | ATPase, Na <sup>+</sup> /K <sup>+</sup> ti | promot         | 0.002 | NO | 4.04 | 4.13 | - | - | - | no |
| chr11 | 120206251 | 120207500 | ENSG00000196914 | ARHGEF12      | Rho guanine nucl                           | promot         | 0.021 | NO | 1.42 | 2.89 | - | - | - | no |
| chr22 | 41843126  | 41844375  | ENSG00000183864 | TOB2          | transducer of ERE                          | promot         | 0.008 | NO | 1.56 | 3.92 | - | - | - | no |
| chr1  | 168521251 | 168522500 | ENSG00000143185 | XCL2          | chemokine (C mo                            | upstre         | 0.023 | NO | 0.71 | 2.89 | - | - | - | no |
| chr14 | 105281751 | 105283000 | ENSG00000258701 | LINC00638     | long intergenic nc                         | upstre         | 0.013 | NO | 2.20 | 5.16 | - | - | - | no |

|       |           |           |                 |            |                                                |       |     |       |       |   |   |   |    |
|-------|-----------|-----------|-----------------|------------|------------------------------------------------|-------|-----|-------|-------|---|---|---|----|
| chr15 | 50565376  | 50566625  | ENSG00000140287 | HDC        | histidine decarboxylase upstream               | 0.035 | NO  | 1.42  | 2.68  | - | - | - | no |
| chr17 | 19308751  | 19310000  | ENSG00000128482 | RNF112     | ring finger protein upstream                   | 0.041 | NO  | 0.14  | 2.06  | - | - | - | no |
| chr17 | 58668376  | 58669625  | ENSG00000170836 | PPM1D      | protein phosphatase upstream                   | 0.035 | NO  | 9.92  | 8.67  | - | - | - | no |
| chr18 | 11154251  | 11155500  | ENSG00000154864 | PIEZO2     | piezo-type mechanosensory channel upstream     | 0.048 | NO  | 0.92  | 2.68  | - | - | - | no |
| chr19 | 36192751  | 36194000  | ENSG00000011590 | ZBTB32     | zinc finger and BTB domain protein upstream    | 0.006 | NO  | 1.35  | 2.27  | - | - | - | no |
| chr19 | 58985376  | 58986625  | ENSG00000083838 | ZNF446     | zinc finger protein upstream                   | 0.019 | NO  | 0.21  | 2.48  | - | - | - | no |
| chr20 | 3020376   | 3021750   | ENSG00000125787 | GNRH2      | gonadotropin-releasing hormone 2 upstream      | 0.001 | NO  | 0.21  | 2.06  | - | - | - | no |
| chr20 | 46127626  | 46128875  | ENSG00000124151 | NCOA3      | nuclear receptor corepressor 3 upstream        | 0.040 | NO  | 2.41  | 4.95  | - | - | - | no |
| chr20 | 53083251  | 53084500  | ENSG00000101134 | DOK5       | docking protein 5 upstream                     | 0.000 | NO  | 11.70 | 10.94 | - | - | - | no |
| chr20 | 53089876  | 53091125  | ENSG00000101134 | DOK5       | docking protein 5 upstream                     | 0.048 | NO  | 9.92  | 8.67  | - | - | - | no |
| chr3  | 64012251  | 64013750  | ENSG00000163636 | PSMD6      | proteasome (prosome) subunit 6 upstream        | 0.001 | NO  | 14.39 | 12.80 | - | - | - | no |
| chr3  | 64016501  | 64018250  | ENSG00000163636 | PSMD6      | proteasome (prosome) subunit 6 upstream        | 0.007 | NO  | 13.12 | 11.56 | - | - | - | no |
| chr4  | 148644251 | 148645500 | ENSG00000071205 | ARHGAP10   | Rho GTPase activator 10 upstream               | 0.030 | NO  | 0.43  | 2.06  | - | - | - | no |
| chr6  | 40298751  | 40300125  | ENSG00000204091 | TDRG1      | testis development regulator 1 upstream        | 0.040 | NO  | 0.71  | 2.27  | - | - | - | no |
| chr8  | 105482501 | 105483750 | ENSG00000147647 | DPYS       | dihydropyrimidinase upstream                   | 0.026 | NO  | 1.98  | 4.34  | - | - | - | no |
| chr3  | 196044501 | 196045750 | ENSG00000213123 | TCTEX1D2   | Tctex1 domain containing 2 5'UTR               | 0.000 | YES | 4.25  | 7.02  | - | - | - | na |
| chr5  | 217626    | 219000    | ENSG00000073578 | SDHA       | succinate dehydrogenase subunit A 5'UTR        | 0.000 | YES | 1.56  | 4.34  | - | - | - | na |
| chr1  | 16939376  | 16940750  | ENSG00000219481 | NBPF1      | neuroblastoma breakpoint family protein 1 exon | 0.000 | YES | 2.13  | 6.40  | - | - | - | na |
| chr7  | 55954501  | 55955875  | ENSG00000178665 | ZNF713     | zinc finger protein 713 5'UTR                  | 0.000 | YES | 0.85  | 3.30  | - | - | - | na |
| chr8  | 125191751 | 125193125 | ENSG00000253868 | FER1L6-AS1 | FER1L6 antisense 1 upstream                    | 0.000 | YES | 2.69  | 5.16  | - | - | - | na |
| chr1  | 149223126 | 149224750 | ENSG00000206737 | RNU1-5     | RNA, U1 small nuclear RNA 5'UTR                | 0.000 | YES | 12.76 | 9.91  | - | - | - | na |
| chr2  | 198363876 | 198365500 | ENSG00000115541 | HSPE1      | heat shock 10kDa protein 1 5'UTR               | 0.000 | YES | 16.31 | 40.25 | - | - | - | na |
| chr19 | 41283376  | 41284750  | ENSG00000167578 | RAB4B      | RAB4B, member RAB4 family, small GTPase 5'UTR  | 0.000 | NO  | 2.41  | 3.72  | - | - | - | na |
| chr19 | 58789501  | 58790875  | ENSG00000267216 | AC010642   | Uncharacterized protein 5'UTR                  | 0.000 | NO  | 3.26  | 4.13  | - | - | - | na |
| chr2  | 86789876  | 86791250  | ENSG00000115561 | CHMP3      | charged multivesicular body protein 3 5'UTR    | 0.000 | NO  | 4.47  | 4.75  | - | - | - | na |
| chr20 | 34252126  | 34253500  | ENSG00000214078 | CPNE1      | copine I [Source:Ensembl] 5'UTR                | 0.011 | NO  | 3.12  | 3.72  | - | - | - | na |
| chr3  | 9856751   | 9858000   | ENSG00000214021 | TTLL3      | tubulin tyrosine lyase 3 exon                  | 0.038 | NO  | 2.06  | 3.51  | - | - | - | na |
| chr1  | 231774501 | 231775750 | ENSG00000162946 | DISC1      | disrupted in schizophrenia 1 intron            | 0.049 | NO  | 0.21  | 1.86  | - | - | - | na |
| chr20 | 35213501  | 35214875  | ENSG00000118707 | TGIF2      | TGF-beta-induced factor 2 intron               | 0.024 | NO  | 1.84  | 2.06  | - | - | - | na |

| <b>Table S6. Identification of over-represented transcription factor motifs within PKC- <math>\theta</math> binding genes.</b> |              |              |                |                  |               |                |                  |               |                                                                                                     |                                                                                 |
|--------------------------------------------------------------------------------------------------------------------------------|--------------|--------------|----------------|------------------|---------------|----------------|------------------|---------------|-----------------------------------------------------------------------------------------------------|---------------------------------------------------------------------------------|
| TF Familie                                                                                                                     | Nr. of Input | Nr. of Match | Expected (log) | Over represented | Z-Score (log) | Expected (log) | Over represented | Z-Score (log) | Description                                                                                         | Binding Factors                                                                 |
| V\$ZF5F                                                                                                                        | 51           | 498          | 17.62          | 28.26            | 114.34        | 147.37         | 3.38             | 28.87         | ZF5 POZ domain zinc finger                                                                          | Zfp161                                                                          |
| V\$E2FF                                                                                                                        | 65           | 741          | 109.87         | 6.74             | 60.21         | 295.89         | 2.5              | 25.9          | E2F-myc activator/cell cycle regulator                                                              | E2f1, E2f2, E2f3, E2f4, E2f5, E2f6, E2f7, E2f8, Tfdp1, Tfdp2, Tfdp3             |
| V\$ZF02                                                                                                                        | 67           | 787          | 113.68         | 6.92             | 63.15         | 345.01         | 2.28             | 23.83         | C2H2 zinc finger transcription factors 2                                                            | Slc12ab, Zbtb7a, Zbtb7b, Zkscan3, Znf148, Znf219, Znf202, Znf281, Znf300        |
| V\$EGRF                                                                                                                        | 63           | 658          | 75.51          | 8.71             | 67.01         | 271            | 2.43             | 23.52         | EGR/nerve growth factor induced protein C & related factors                                         | Egr1, Egr2, Egr4, Egr3, Wt1                                                     |
| V\$SP1F                                                                                                                        | 63           | 606          | 75.75          | 8                | 60.9          | 245.08         | 2.47             | 23.06         | GC-Box factors SP1/GC                                                                               | Cdca7l, Eapp, Klf10, Klf11, Klf16, Klf5, Sp1, Sp2, Sp3, Sp4, Sp5, Sp6, Sp7, Sp8 |
| V\$NRF1                                                                                                                        | 45           | 304          | 6.9            | 44.08            | 112.95        | 93.91          | 3.24             | 21.64         | Nuclear respiratory factor 1                                                                        | Nrf1                                                                            |
| V\$CTCF                                                                                                                        | 65           | 462          | 49.03          | 9.42             | 58.92         | 182.25         | 2.53             | 20.71         | CTCF and BORIS gene family, transcriptional regulators with 11 highly conserved zinc finger domains | Ctcf, Ctcf1                                                                     |
| V\$PLAG                                                                                                                        | 62           | 452          | 76.22          | 5.93             | 43.01         | 196.65         | 2.3              | 18.2          | Pleomorphic adenoma gene                                                                            | Plag1, Plagl1, Plagl2                                                           |
| V\$HDBP                                                                                                                        | 45           | 169          | 5.31           | 31.85            | 70.84         | 51.45          | 3.29             | 16.33         | Huntington's disease gene regulatory region binding proteins                                        | Slc2a4rg, Znf395                                                                |
| V\$MAZF                                                                                                                        | 57           | 316          | 40.86          | 7.73             | 42.98         | 132.58         | 2.38             | 15.9          | Myc associated zinc fingers                                                                         | Maz, Patz1                                                                      |
| V\$KLFS                                                                                                                        | 67           | 592          | 191.19         | 3.1              | 28.99         | 341.45         | 1.73             | 13.57         | Krueppel like transcription factors                                                                 | Klf1, Klf12, Klf13, Klf15, Klf2, Klf3, Klf4, Klf6, Klf7, Klf8, Klf9             |
| V\$AP2F                                                                                                                        | 59           | 305          | 58.65          | 5.2              | 32.12         | 150.35         | 2.03             | 12.58         | Activator protein 2                                                                                 | Tfap2a, Tfap2b, Tfap2c, Tfap2d, Tfap2e                                          |
| V\$NDPK                                                                                                                        | 55           | 224          | 31.28          | 7.16             | 34.38         | 101            | 2.22             | 12.2          | Nucleoside diphosphate kinase                                                                       | Nme1, Nme2                                                                      |
| V\$CDEF                                                                                                                        | 43           | 85           | 5.14           | 16.53            | 34.99         | 30.78          | 2.76             | 9.68          | Cell cycle regulators: Cell cycle dependent element                                                 | not known                                                                       |
| V\$DEAF                                                                                                                        | 48           | 84           | 10.48          | 8.02             | 22.56         | 31.87          | 2.64             | 9.15          | Homolog to deformed epidermal autoregulatory factor-1 from D. melanogaster                          | Deaf1                                                                           |
| V\$NFkB                                                                                                                        | 56           | 185          | 67.94          | 2.72             | 14.15         | 102.97         | 1.8              | 8.04          | Nuclear factor kappa B/c-rel                                                                        | Hivep1, Hivep2, Hivep3, Nfkb1, Nfkb2, Rel, Rela, Relb                           |
| V\$ZF07                                                                                                                        | 49           | 139          | 25.79          | 5.39             | 22.2          | 71.4           | 1.95             | 7.94          | C2H2 zinc finger transcription factors 7                                                            | Znf263                                                                          |
| V\$NOLF                                                                                                                        | 56           | 156          | 42.19          | 3.7              | 17.45         | 83.25          | 1.87             | 7.92          | Neuron-specific olfactory factor                                                                    | Ebf1, Ebf2, Ebf3, Ebf4                                                          |
| V\$NRSF                                                                                                                        | 54           | 161          | 41.94          | 3.84             | 18.31         | 87.18          | 1.85             | 7.86          | Neuron-restrictive silencer factor                                                                  | Rest                                                                            |
| V\$WHNF                                                                                                                        | 43           | 81           | 9.88           | 8.2              | 22.46         | 36.65          | 2.21             | 7.25          | Winged helix binding sites                                                                          | Foxn1, Foxn2                                                                    |
| V\$HESF                                                                                                                        | 54           | 185          | 59.7           | 3.1              | 16.16         | 109            | 1.7              | 7.24          | Vertebrate homologues of enhancer of split complex                                                  | Hes1, Hes2, Hey1, Hey2, Helt, Itgb3bp                                           |
| V\$AHRR                                                                                                                        | 54           | 139          | 35.73          | 3.89             | 17.2          | 75.83          | 1.83             | 7.2           | AHR-arnt heterodimers and AHR-related factors                                                       | Ahr, Arnt, Npas4, Sim1, Sim2                                                    |
| V\$ZF57                                                                                                                        | 38           | 76           | 13.49          | 5.63             | 16.88         | 34.12          | 2.23             | 7.09          | KRAB domain zinc finger protein 57                                                                  | Zfp57                                                                           |
